# Supplementary material for: Primary α-tertiary amine synthesis via α-C–H functionalization
Source: Royal Society of Chemistry journal article supplement (doi:10.1039/c8sc05164j), 2019-01-01
Supplement: c8sc05164j2.pdf [file c8sc05164j2.pdf]

## Supplementary Materials for

### **Primary $\alpha$ -Tertiary Amine Synthesis *via* $\alpha$ -C–H Functionalization**

Dhananjayan Vasu, Ángel L. Fuentes de Arriba, Jamie A. Leitch, Antoine de Gombert,

Darren J. Dixon\*

Correspondence to: [darren.dixon@chem.ox.ac.uk](mailto:darren.dixon@chem.ox.ac.uk)

## Table of Contents

|                                                                                                                  |      |
|------------------------------------------------------------------------------------------------------------------|------|
| 1: General information:.....                                                                                     | S3   |
| 2: Optimization study:.....                                                                                      | S4   |
| 2.1: Optimization for organometallic addition:.....                                                              | S4   |
| 2.2: Optimization for cyanation:.....                                                                            | S4   |
| 2.3: Optimization for oxidative cleavage of phenol unit: .....                                                   | S5   |
| 3: General Procedures:.....                                                                                      | S6   |
| 3.1: Synthesis of <i>o</i> -quinones:.....                                                                       | S6   |
| 3.1.1: Synthesis of 4-( <i>tert</i> -butyl)- <i>o</i> -benzoquinone (A):.....                                    | S6   |
| 3.1.2: Synthesis of 4-( <i>tert</i> -butyl)-5-methoxy- <i>o</i> -benzoquinone (B): .....                         | S6   |
| 3.1.3: Synthesis of 3,5-diisopropyl- <i>o</i> -benzoquinone (C):.....                                            | S7   |
| 3.1.4: Synthesis of 3,5-di- <i>tert</i> -butyl- <i>o</i> -benzoquinone (D):.....                                 | S7   |
| 3.2: General Procedure A for $\alpha$ -C–H Functionalization of primary amines with Grignard reagent: S8         |      |
| 3.3: General Procedure B for $\alpha$ -C–H Functionalization of primary amines with Grignard reagent: S9         |      |
| 3.4 General Procedure C for $\alpha$ -C–H Functionalization of primary amines with organolithium reagents: ..... | S9   |
| 3.5 General Procedure D for oxidative cyanation of primary amines: .....                                         | S10  |
| 3.6: General Procedure E for the photocatalytic reverse polarity $\alpha$ -allylation: .....                     | S11  |
| 3.7: Procedure for Alternative Protocol (Scheme 6A) .....                                                        | S12  |
| 3.6.1: Photoreactor details: .....                                                                               | S13  |
| 3.6.2: Coupling partner synthesis: .....                                                                         | S14  |
| 4: Demonstration of stepwise procedure for one-pot operation:.....                                               | S18  |
| 5: Spectral data for $\alpha$ -functionalized products (1-68):.....                                              | S31  |
| 6: NMR Spectra:.....                                                                                             | S57  |
| 7: X- ray structure and data for compound 57:.....                                                               | S144 |
| 8: References:.....                                                                                              | S147 |

## 1: General information:

All reagents bought from commercial sources were used as received. Organic solvents were evaporated under reduced pressure using a Büchi rotary evaporator. All solvents were commercially supplied or dried by filtration through activated alumina (powder ~150 mesh, pore size 58 Å, basic, Sigma-Aldrich) columns. Petrol ether (PE) refers to distilled light petroleum of fraction 30 - 40 °C. Toluene was distilled twice over calcium hydride.

All reactions were followed by thin-layer chromatography (TLC) when practical, using Merck Kieselgel 60 F254 fluorescent treated silica. Visualization was accomplished under UV light ( $\lambda_{\text{max}} = 254$  nm) and by staining with potassium permanganate staining dip. Chromatographic purification was performed on VWR 60 silica gel 40-63  $\mu\text{m}$  using HPLC grade solvents that were used as supplied. NMR spectra were recorded on Bruker spectrometers operating at 400 or 500 MHz ( $^1\text{H}$  resonance). Proton chemical shifts ( $\delta$ ) are given in parts per million (ppm) relative to tetramethylsilane (TMS) with the solvent resonance as internal standard:  $\text{CDCl}_3$ ,  $\delta = 7.26$  ppm;  $\text{CD}_2\text{Cl}_2$ ,  $\delta = 5.32$  ppm;  $\text{CD}_3\text{CN}$ ,  $\delta = 2.13$  ppm;  $\text{CD}_3\text{OD}$ ,  $\delta = 3.31$  ppm. The following abbreviations are used to describe spin multiplicity: s = singlet, d = doublet, t = triplet, q = quartet, dd = doublet of doublets, dt = doublet of triplets, ddt = doublet of doublet of triplets, m = multiplet, br s = broad signal. Coupling constants ( $J$ ) are given in Hertz (Hz).  $^{13}\text{C}$  NMR spectra were recorded with complete proton decoupling. Carbon chemical shifts are reported in ppm ( $\delta$ ) relative to TMS with the solvent resonance as internal standard:  $\text{CDCl}_3$ ,  $\delta = 77.16$  ppm;  $\text{CD}_2\text{Cl}_2$ ,  $\delta = 53.84$  ppm;  $\text{CD}_3\text{CN}$ ,  $\delta = 1.32$  ppm.  $\text{CD}_3\text{OD}$ ,  $\delta = 49.00$  ppm. Two-dimensional NMR spectroscopy experiments (COSY, HSQC and HMBC) were used where appropriate to assist in the assignment of signals in  $^1\text{H}$  and  $^{13}\text{C}$  spectra and data are not reported. High-resolution mass spectra (HRMS) were recorded on Bruker Daltonics MicroTOF mass spectrometer equipped with an ESI source. Infrared spectra (IR) were recorded on a Bruker Tensor 27 FT-IR spectrometer from a thin film on a diamond ATR module. Only selected maximum absorbances are reported. All other commercial reagents were used without further purification, unless otherwise indicated.

## 2: Optimization study:

### 2.1: Optimization for organometallic addition:

Table S1:

(i) Quinone **A-F** (1 eq), solvent (0.1 M), 25 °C, 1-24 h  
(ii) **AllylMgBr** (6 eq), additive (1 eq), 0-25 °C, 24 h  
(iii) **I<sub>2</sub>** (1.2 eq)/ **NaOH** (5 eq, 1M), **CH<sub>3</sub>CN** (0.05 M)  
0 °C, 10-15 min

| Entry | Quinone  | Additive (1 equiv) | Solvent           | Isolated yield (%) |
|-------|----------|--------------------|-------------------|--------------------|
| 1     | A        | ---                | PhMe              | c.m                |
| 2     | B        | ---                | PhMe              | c.m                |
| 3     | C        | ---                | PhMe              | 32                 |
| 4     | D        | ---                | PhMe              | 56                 |
| 5     | <b>D</b> | <b>TMEDA</b>       | <b>PhMe</b>       | <b>81</b>          |
| 6     | C        | TMEDA              | DCE               | 72                 |
| 7     | C        | TMEDA              | THF               | 52                 |
| 8     | C        | TMEDA              | Et <sub>2</sub> O | 51                 |
| 9     | C        | TMEDA              | Dioxane           | 24                 |
| 10    | E        | ---                | DCE               | n.r                |
| 11    | F        | ---                | DCE               | n.r                |

**A** = R<sup>4</sup>=*t*Bu; R<sup>5</sup>=H  
**B** = R<sup>4</sup>=*t*Bu; R<sup>5</sup>=OMe  
**C** = R<sup>4</sup>=*i*Pr; R<sup>6</sup>=*i*Pr  
**D** = R<sup>4</sup>=*t*Bu; R<sup>6</sup>=*t*Bu  
**E**  
**F**

Yields are reported after isolation from silica gel flash column chromatography. c.m = complex mixture in ketimine formation. n.r = represents no hemiaminal formation at both 25 °C and 80 °C in DCE. DCE = 1,2-Dichloroethane. TMEDA = N,N,N',N'-Tetramethylethylenediamine.

We began our investigation by screening various quinones against 1-(4-methoxyphenyl)ethan-1-amine with commercially available allylmagnesium bromide and the results are summarised in Table S1. Further screening in solvents reveal that toluene (entry 5) is superior to chlorinated (entry 6) or ethereal solvents (entries 7-9) under these standard conditions. DCE is superior to other solvents for *p*-quinones **E** and **F**, due to its poor solubility. No hemiaminal formation occurred with both *p*-quinones **E** and **F** (entries 10-11) with DCE at either 25 °C or 80 °C which suggest that are not suitable reagents for this transformation.

### 2.2: Optimization for cyanation:

After several attempts, we were delighted to find that the careful selection of solvents along with the nucleophile source (TMSCN), can play a crucial role in the incorporation of nitriles to the ketimines (Table S2). The reaction is unsuccessful with toluene alone but successful with the combination of toluene and MeOH in 2:1 ratio (0.1 M), suggesting that MeOH is crucial for the

generation of HCN from TMSCN. Pleasingly, almost comparable results were observed (entries 2-3) with MeOH (0.1 M) alone. For the sake of convenience and homogeneity, we decided to use MeOH (0.1 M) as solvent for the subsequent transformations.

**Table S2:**

| entry | solvent         | time/h | products (%)     |
|-------|-----------------|--------|------------------|
| 1     | PhMe            | 4      | n.r <sup>a</sup> |
| 2     | PhMe/MeOH (2:1) | 24     | <b>57</b> (96)   |
| 3     | MeOH            | 24     | <b>57</b> (97)   |

<sup>a</sup> Imine/hemiaminal was intacted after 4 h at 25 °C.

### 2.3: Optimization for oxidative cleavage of phenol unit:

**Table S3:**

| entry | oxidant                                                                        | solvent                                   | time   | product yields |      |     |
|-------|--------------------------------------------------------------------------------|-------------------------------------------|--------|----------------|------|-----|
|       |                                                                                |                                           |        | 49             | 49'' | D   |
| 1     | I <sub>2</sub> (2 equiv)/ aq. NaOH (5 equiv)                                   | CH <sub>3</sub> CN                        | 24 h   | ---            | 99%  | --- |
| 2     | CAN (4 equiv)                                                                  | CH <sub>3</sub> CN:H <sub>2</sub> O (1:1) | 15 min | ---            | ---  | 72% |
| 3     | PhI(OAc) <sub>2</sub> (2 equiv)                                                | CH <sub>3</sub> CN:H <sub>2</sub> O (2:1) | 15 min | ---            | 82%  | 10% |
| 4     | PhI(OTFA) <sub>2</sub> (2 equiv)                                               | CH <sub>3</sub> CN:H <sub>2</sub> O (2:1) | 15 min | ---            | ---  | 85% |
| 5     | PhI=O (2 equiv)                                                                | CH <sub>3</sub> CN:H <sub>2</sub> O (2:1) | 15 min | ---            | 95%  | --- |
| 6     | O <sub>2</sub> ballon/ aq. NaOH (5 equiv)                                      | CH <sub>3</sub> CN                        | 24 h   | ---            | 65%  | 12% |
| 7     | H <sub>5</sub> IO <sub>6</sub> (4 equiv)/ Conc. H <sub>2</sub> SO <sub>4</sub> | CH <sub>3</sub> CN:H <sub>2</sub> O (1:1) | 10 min | 84%            | ---  | 92% |
| 8     | H <sub>5</sub> IO <sub>6</sub> (1.05 equiv)                                    | CH <sub>3</sub> CN:H <sub>2</sub> O (1:1) | 10 min | 86%            | ---  | 96% |

The initial oxidative conditions (I<sub>2</sub>/NaOH) were unsuccessful and gave only the undesired imine **49''** (Table S3, entry 1). Further hydrolysis of **49''** with either aqueous NaOH or aqueous HCl gave complex mixture of products. After numerous attempts by screening a variety of oxidants, we were pleased to find that orthoperiodic acid (H<sub>5</sub>IO<sub>6</sub>) proved to be more efficient and cleaved the phenolic unit completely from the cyanoaddition product (entry 8).

### 3: General Procedures:

#### 3.1: Synthesis of *o*-quinones:

##### 3.1.1: Synthesis of 4-(*tert*-butyl)-*o*-benzoquinone (A):

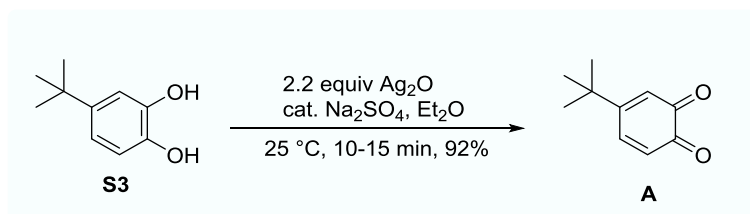

The compound **A** was synthesised using the known literature method with slight modifications. To an ether (30 mL) solution of 4-*tert*-butylcatechol **S3** (0.50 g, 2.57 mmol) and Na<sub>2</sub>SO<sub>4</sub> (0.1 g) was added Ag<sub>2</sub>O (3.10 g, 13.4 mmol) at 25 °C and stirred the resulting heterogeneous mixture for 10-15 min. After completion as indicated by TLC, the ether layer was collected by filtration. The combined ether layer was dried by Na<sub>2</sub>SO<sub>4</sub> and concentrated to give 4-(*tert*-butyl)-*o*-benzoquinone **A** as a red solid (0.91 g, 5.60 mmol, 92%). <sup>1</sup>H NMR (400 MHz, CDCl<sub>3</sub>): δ 7.18 (dd, *J* = 10.4, 2.4 Hz, 1 H), 6.40 – 6.31 (m, 1 H), 6.24 (dd, *J* = 2.2, 1.2 Hz, 1 H), 1.22 – 1.20 (m, 9 H). <sup>13</sup>C NMR (101 MHz, CDCl<sub>3</sub>): δ 180.4, 180.3, 162.2, 140.2, 129.5, 123.9, 35.7, 27.9. The remaining data is consistent with the literature precedent.<sup>1</sup>

##### 3.1.2: Synthesis of 4-(*tert*-butyl)-5-methoxy-*o*-benzoquinone (B):

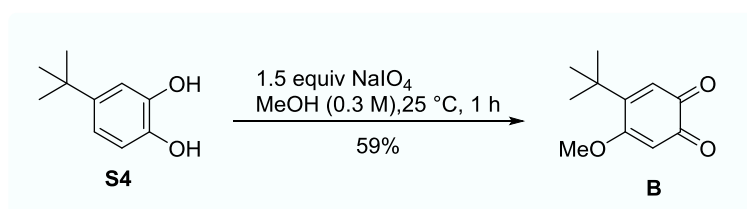

The compound **B** was synthesised using the known literature method with slight modifications. 4-(*tert*-butyl)benzene-1,2-diol **S4** (1.00 g, 6.02 mmol) was dissolved in a 100 mL round bottom flask using 20 mL of methanol. To this, NaIO<sub>4</sub> (1.93 g, 9.02 mmol) was added at 25 °C and stirred for 1 h. After completion as indicated by TLC, water (50 mL) was added and the resulting solution was extracted with ether (100 mL), dried (Na<sub>2</sub>SO<sub>4</sub>) and evaporated under rotary evaporator. The crude dark red sticky material was triturated with *n*-pentane to give a red solid of 4-(*tert*-butyl)-5-methoxy-*o*-benzoquinone **B** (0.69 g, 3.55 mmol, 59%). The data is consistent with the literature precedent.<sup>1</sup>

### 3.1.3: Synthesis of 3,5-diisopropyl-*o*-benzoquinone (C):

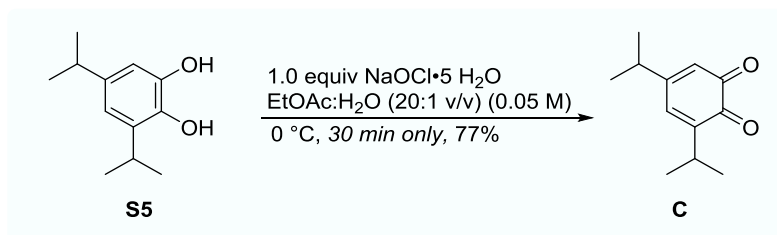

The compound **C** was synthesised using the known literature method with slight modifications. 3,5-diisopropylcatechol **S5** (0.50 g, 2.57 mmol) was dissolved in a 100 mL round bottom flask using 49 mL of EtOAc and 2.5 mL of water (20:1, 0.05 M) and the resulting biphasic solution was cooled to 0 °C before the addition of bleach (NaOCl·5H<sub>2</sub>O) (3.02 mL, 2.57 mmol, 6-14% active Cl<sub>2</sub>). The resulting heterogeneous green solution was stirred for exactly 30 minutes at 0 °C. After this time, the crude product was taken into separating funnel and organic phase was separated, washed with brine and dried (Na<sub>2</sub>SO<sub>4</sub>), filtered, and concentrated under reduced pressure. The crude product was recrystallized using pentane gave a deep brown solid of compound **C** (380 mg, 1.98 mmol, 77%). <sup>1</sup>H NMR (400 MHz, CDCl<sub>3</sub>): δ 6.62 (d, *J* = 0.9 Hz, 1 H), 6.11 (d, *J* = 0.9 Hz, 1 H), 2.97 (m, 1 H), 2.55 (m, 1 H), 1.19 (d, *J* = 6.8 Hz, 6 H), 1.12 (d, *J* = 6.8 Hz, 6 H). <sup>13</sup>C NMR (101 MHz, CDCl<sub>3</sub>): δ 180.8, 180.4, 161.8, 149.1, 134.6, 122.2, 34.9, 27.5, 21.7, 20.6. The remaining data was consistent with the literature.<sup>2</sup>

### 3.1.4: Synthesis of 3,5-di-*tert*-butyl-*o*-benzoquinone (D):

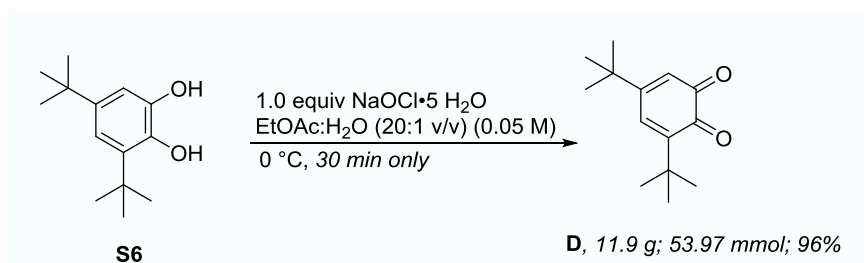

The compound **D** was synthesised using the known literature method with slight modifications. 3,5-di-*tert*-butylcatechol **S6** (12.5 g, 56.3 mmol) was dissolved in a 2 L round bottom flask using 1.07 L of EtOAc and 53.6 mL of water (20:1, 0.05 M) and the resulting biphasic solution was cooled to 0 °C before the addition of bleach (NaOCl·5H<sub>2</sub>O) (66.0 mL, 56.2 mmol, 6-14% active Cl<sub>2</sub>). The resulting heterogeneous green solution was stirred for exactly 30 minutes at 0 °C. After this time, the crude product was taken into separating funnel and organic phase was separated, washed with brine and dried (Na<sub>2</sub>SO<sub>4</sub>), filtered, and concentrated under reduced pressure. The crude product was recrystallized using pentane gave a deep red crystals of compound **D** (11.9 g, 53.97 mmol, 96%). <sup>1</sup>H NMR (400 MHz, CDCl<sub>3</sub>): δ 6.92 (d, *J* = 2.3 Hz, 1 H), 6.20 (d, *J* = 2.3 Hz, 1 H), 1.26 (s, 9 H), 1.21 (s, 9 H).

$^{13}\text{C}$  NMR (101 MHz,  $\text{CDCl}_3$ ):  $\delta$  181.3, 180.2, 163.4, 150.1, 133.6, 122.2, 36.2, 35.6, 29.3, 28.0. The remaining data was consistent with the literature.<sup>2</sup>

**3.2: General Procedure A** for  $\alpha\text{-C-H}$  Functionalization of primary amines with Grignard reagent:

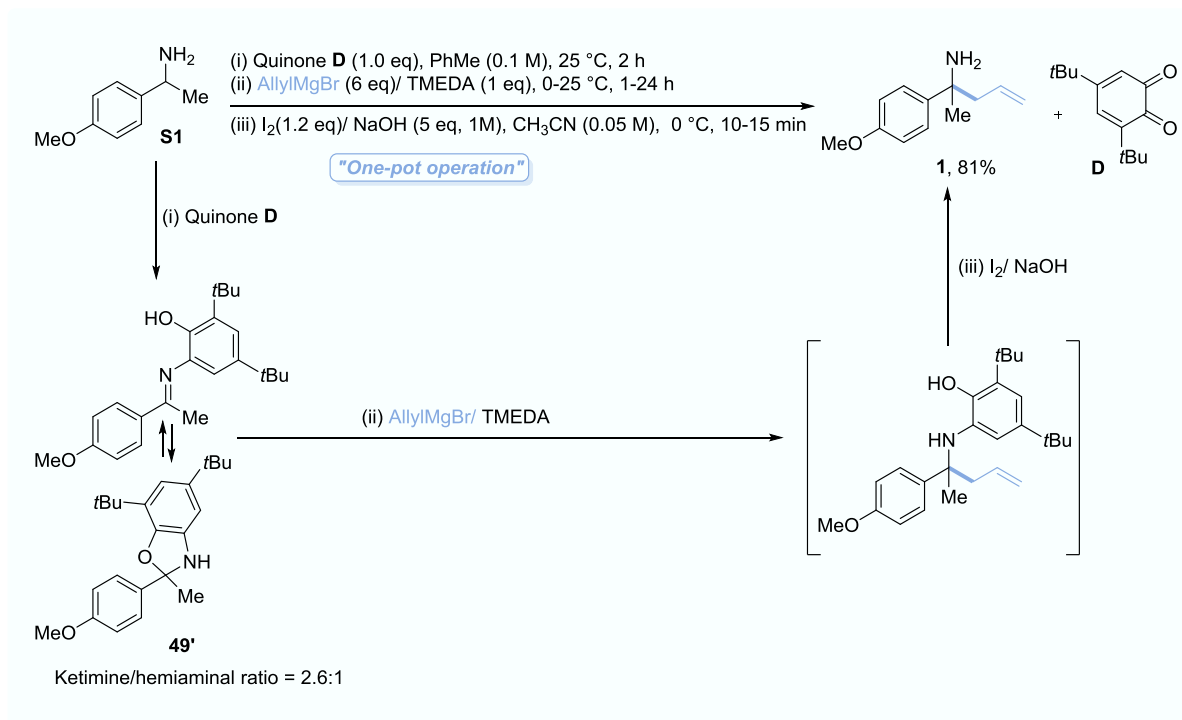

The synthesis of 2-(4-methoxyphenyl)pent-4-en-2-amine **1** is representative. To a stirred solution of 3,5-di-*tert*-butyl-*o*-benzoquinone **D** (0.29 g, 1.32 mmol, 1.0 equiv) in toluene (6.0 mL), was added a solution of 1-(4-methoxyphenyl)ethan-1-amine **S1** (0.20 g, 1.32 mmol, 1.0 equiv) in toluene (7.2 mL) dropwise over 5 min under argon atmosphere. The deep green coloured solution was stirred at room temperature for 2 h. After completion as indicated by TLC (*Note: colour changes from deep green to dark violet*), the reaction mixture was cooled to 0 °C, and was added TMEDA (0.19 mL, 1.32 mmol, 1.0 equiv) and allylmagnesium bromide (1.0 M in  $\text{Et}_2\text{O}$ , 7.94 mL, 7.94 mmol, 6.0 equiv) and maintained at 0 °C for 1 h. During the Grignard addition, the colour of the reaction mixture changes from dark violet to yellowish brown. The reaction temperature was gradually allowed to return to 25 °C and allowed to stir until TLC analysis (A small aliquot of the reaction mixture was worked up in  $\text{NH}_4\text{Cl}$ -EtOAc to check TLC (Pentane:EtOAc 9.5:0.5)) showed complete conversion. After completion of the reaction as indicated by TLC, the reaction mixture was again cooled to 0 °C and aqueous NaOH (1 M) (6.62 mL, 6.62 mmol, 5.0 equiv) was carefully added dropwise to quench the remaining Grignard reagent. To the resulting heterogeneous mixture were added 26 mL of  $\text{CH}_3\text{CN}$  (0.05 M) and iodine granules (0.40 g, 1.59 mmol, 1.2 equiv) and stirred vigorously for 10 min under argon



atmosphere. The *o*-quinone reappeared gradually during basic oxidation. After completion, reaction mixture was extracted with CH<sub>3</sub>CN (3 x 20 mL). The combined organic layers were washed with aqueous saturated sodium thiosulfate (1 x 10 mL) and brine (2 x 10 mL), respectively, dried over Na<sub>2</sub>SO<sub>4</sub>, filtered, and concentrated *in vacuo*. The crude residue was purified by column chromatography on silica gel eluting with Pentane:EtOAc (80:20 v:v) to EtOAc:MeOH:Et<sub>3</sub>N (70:20:10 v:v) to afford compound **1** (205 mg, 1.07 mmol, 81%) as a yellow oil.

**3.3: General Procedure B** for  $\alpha$ -C–H Functionalization of primary amines with Grignard reagent:

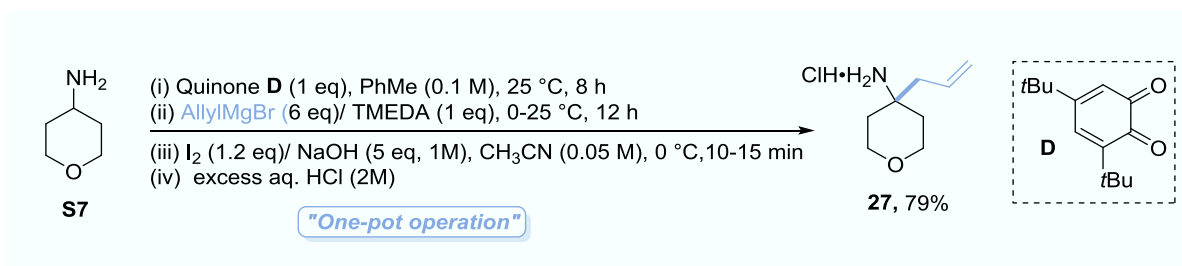

The synthesis of 4-allyltetrahydro-2H-pyran-4-amine hydrochloride **27** is representative. For volatile, low boiling point amines, a modified work-up was employed. After oxidative cleavage of the *o*-quinone, the reaction mixture was extracted with CH<sub>3</sub>CN (3 x 20 mL). The combined organic layers were washed with saturated sodium thiosulfate (1 x 10 mL), brine (2 x 10 mL) respectively. The organic layer was acidified with aqueous 2 M HCl and extracted two times (2 x 20 mL) with aqueous 2 M HCl. The combined aqueous phases were washed with hexane and concentrated *in vacuo* (Bath temp: 60 °C, 72 mbar) to afford the crude yellow solid, which was dissolved in warm CHCl<sub>3</sub>, dried over Na<sub>2</sub>SO<sub>4</sub>, filtered, and concentrated under reduced pressure to give 4-allyltetrahydro-2H-pyran-4-amine hydrochloride **27** (139 mg, 0.78 mmol, 79%) as off-white powder.

**3.4 General Procedure C** for  $\alpha$ -C–H Functionalization of primary amines with organolithium reagents:

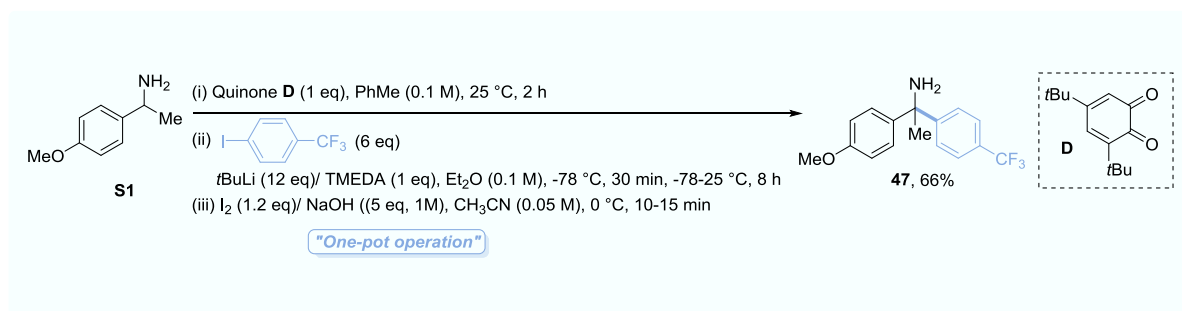

The synthesis of 1-(4-methoxyphenyl)-1-(4-(trifluoromethyl)phenyl)ethan-1-amine **47** is representative. To a stirred solution of 3,5-di-*tert*-butyl-*o*-benzoquinone **D** (0.15 g, 0.66 mmol, 1.0 equiv) in toluene (3.3 mL), was added a solution of 1-(4-methoxyphenyl)ethan-1-amine **S1** (0.10 g, 0.66 mmol, 1.0 equiv) in toluene (3.3 mL) dropwise over 5 min under argon atmosphere. The deep green coloured solution was stirred at room temperature for 2 h. In the meantime, the organolithium was prepared by treating 1-iodo-4-(trifluoromethyl)benzene (0.58 mL, 3.97 mmol, 6 equiv) with *t*BuLi (4.67 mL, 7.94 mmol, 1.7 M in pentane, 12 equiv) at -78 °C for 30 min in dry Et<sub>2</sub>O (0.1 M) under argon atmosphere.<sup>4</sup> After completion of the ketimine/hemiaminal formation as indicated by TLC (*Note: colour changes from deep green to dark violet*), the reaction mixture was treated with TMEDA (94 µL, 0.66 mmol, 1.0 equiv) and transferred through syringe to the flask containing (4-(trifluoromethyl)phenyl)lithium at -78 °C, and the resulting mixture stirred for 8 h at 25 °C. A small aliquot of the reaction mixture was worked up in NH<sub>4</sub>Cl-EtOAc to check TLC (Pentane:EtOAc 9.5:0.5). After completion of the reaction as indicated by TLC, the reaction mixture was cooled to 0 °C and aqueous NaOH (1 M) (3.31 mL, 3.31 mmol, 5.0 equiv) was added dropwise to quench the remaining organolithium reagent. To this mixture were added 13 mL of CH<sub>3</sub>CN and iodine granules (0.20 g, 0.79 mmol, 1.2 equiv) and the mixture stirred vigorously for 10 min under argon atmosphere. The *o*-quinone reappeared gradually during basic oxidation. After completion, the reaction mixture was extracted with CH<sub>3</sub>CN (3 x 20 mL). The combined organic layers were washed with aqueous saturated sodium thiosulfate (1 x 10 mL) and brine (2 x 10 mL), dried over Na<sub>2</sub>SO<sub>4</sub>, filtered, and concentrated under reduced pressure. The crude residue was purified by column chromatography on silica gel eluting with Pentane:EtOAc (80:20 v:v) to EtOAc:MeOH:Et<sub>3</sub>N (70:20:10 v:v) to afford compound **47** (129 mg, 0.44 mmol, 66%) as a brown oil.

### 3.5 General Procedure D for oxidative cyanation of primary amines:

The synthesis of 4-aminotetrahydro-2*H*-pyran-4-carbonitrile **54** is representative.<sup>7</sup>

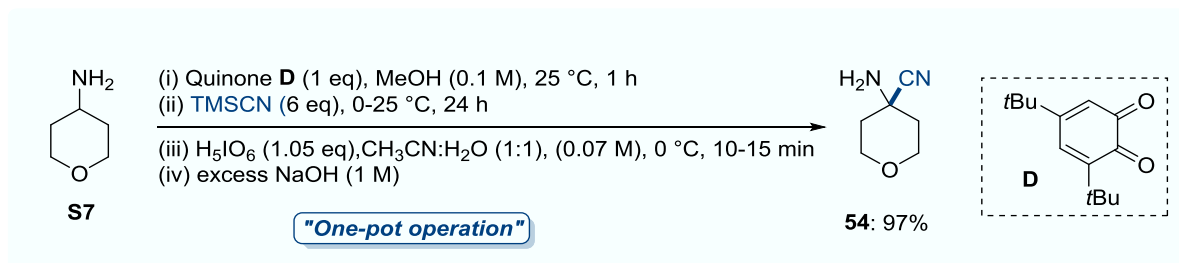

To a stirred solution of 3,5-di-*tert*-butyl-*o*-benzoquinone **D** (0.22 g, 0.99 mmol, 1.0 equiv) in MeOH (5.0 mL), was added slowly a solution of 4-aminotetrahydropyran **S7** (0.10 g, 0.99 mmol, 1.0 equiv) in MeOH (5 mL) dropwise over 5 min and the resulting mixture was stirred for 1 h at 25 °C. After

completion as indicated by TLC, the reaction mixture was then cooled to 0 °C and trimethylsilyl cyanide (0.74 mL, 5.93 mmol, 6.0 equiv) was added. The resulting mixture was gradually allowed to return to 25 °C and allowed to stir until TLC analysis showed complete conversion. After completion as indicated by TLC, solvent and excess trimethylsilyl cyanide were removed on a rotary evaporator using bath temperature below 25 °C (*Caution: high bath temperature causes decomposition of addition product*). The resulting grey solid was dissolved in CH<sub>3</sub>CN:H<sub>2</sub>O (1:1) (14.1 mL), and cooled to 0 °C. To the resulting mixture was added orthoperiodic acid (H<sub>5</sub>IO<sub>6</sub>) (0.24 g, 1.04 mmol, 1.05 equiv) and stirred vigorously for 10 min (appearance of brown colour denotes reformation of quinone). After completion, the organic solvent was removed under reduced pressure (Bath temp: 40 °C) and the resulting aqueous acidic phase was washed with Et<sub>2</sub>O:Hexane (10:1) (2 x 10 mL), and the aqueous phase was then concentrated *in vacuo* (Bath temp: 60 °C, 72 mbar). The resulting residue was basified with 1 M NaOH (5 mL) and extracted with CHCl<sub>3</sub> (3 x 10 mL). The combined organic layers were washed with brine, dried over Na<sub>2</sub>SO<sub>4</sub>, filtered and concentrated *in vacuo* to afford the 4-aminotetrahydro-2H-pyran-4-carbonitrile **54** as a yellow oil (121 mg, 0.96 mmol, 97%). In most cases (**48**, **51**, **52**, **53**, **55**, **56**, **66**, **68**), the obtained crude products were pure, and no further purification was performed. Compounds **49** and **50** were purified by column chromatography on Et<sub>3</sub>N-treated silica gel eluting with (pentane/EtOAc = 80:20 v:v) to (EtOAc:MeOH:Et<sub>3</sub>N = 70:20:10 v:v).

### 3.6: General Procedure E for the photocatalytic reverse polarity $\alpha$ -allylation:

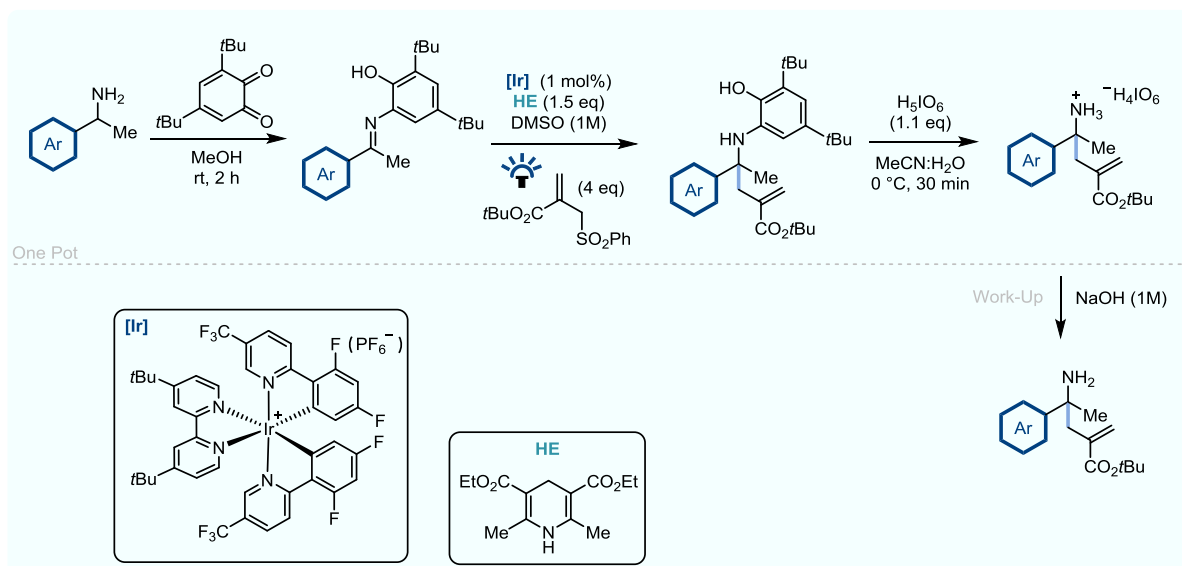

To a mass spec vial under a stream of N<sub>2</sub> was equipped a micro-stirrer charged 3,5-di-*tert*-butyl-*o*-benzoquinone **D** (55.0 mg, 0.25 mmol), anhydrous MeOH (0.50 mL), and relevant benzylamine structure (0.25 mmol). The nitrogen line was removed and the reaction mixture allowed to stir for 2

h. The solvent was then removed under a nitrogen stream. To the residue was added anhydrous DMSO (0.25 mL), followed by  $\text{Ir}[(\text{dFCF}_3\text{ppy})_2(\text{dtbbpy})]\text{PF}_6$  ( $[\text{Ir}]$ , 2.8 mg, 0.0025 mmol), diethyl 1,4-dihydro-2,6-dimethyl-3,5-pyridinedicarboxylate (HE, 95.0 mg, 0.375 mmol) and *tert*-butyl 2-((phenylsulfonyl)methyl)acrylate (282 mg, 1.00 mmol). The reaction mixture was then degassed with  $\text{N}_2$  for 10 min. The flask was sealed and allowed to stir for 20 h under blue light irradiation. After this time the reaction mixture was cooled to 0 °C, and MeCN (0.50 mL), water (0.25 mL) and periodic acid (63.0 mg, 0.28 mmol) were added. The resulting mixture went instantly deep brown to signal reformation of 3,5-di-*tert*-butyl-*o*-benzoquinone and was then allowed to stir at 0 °C for 30 min. The reaction mixture was poured into a separating funnel containing water (5 mL) and  $\text{Et}_2\text{O}$  (10 mL). The aqueous phase was extracted, and the organic phase re-extracted with water (4 x 5 mL). To the combined aqueous phases was added NaOH (1M, 10 mL). The aqueous phase was then extracted with  $\text{EtOAc}:\text{MeCN}$  (1:1, 5 x 10 mL). The combined organics were then washed with NaOH (1M, 5 x 5 mL) and the organics were dried over  $\text{MgSO}_4$  and concentrated *in vacuo*. The crude residue was then purified *via* silica gel column chromatography to give the desired primary amine product.

### 3.7: Procedure for Alternative Protocol (Scheme 6A)

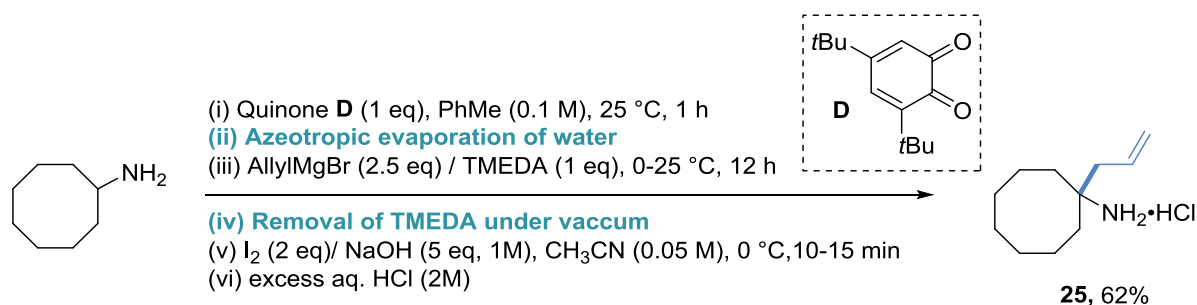

To a stirred solution of 3,5-di-*tert*-butyl-*o*-benzoquinone **D** (1.75 g, 7.94 mmol, 1.01 equiv) in toluene (40 mL), was added a solution of 1-(4-methoxyphenyl)ethan-1-amine **S1** (1.00 g, 7.86 mmol, 1.0 equiv) in toluene (40 mL) dropwise over 5 min under argon atmosphere. After completion as indicated by TLC (*Note: colour changes from deep green to dark violet*), the reaction mixture was concentrated *in vacuo* (150 – 5 mbar, 40 °C) to remove water. To the crude residue was added toluene (80 mL) and 4Å molecular sieves ( and the reaction mixture was cooled to 0 °C. To the cooled solution was added TMEDA (1.18 mL, 7.86 mmol, 1.0 equiv) and allylmagnesium bromide (1.0 M in  $\text{Et}_2\text{O}$ , 19.63 mL, 19.63 mmol, 2.5 equiv) and maintained at 0 °C for 30 mins. The reaction temperature was gradually allowed to return to 25 °C and allowed to stir until TLC analysis showed complete conversion. concentrated *in vacuo* (80 - 40 mbar, 60 °C, then high vacuum) to remove the TMEDA. (to assist product isolation post-oxidation). The crude residue was again cooled to 0 °C and aqueous NaOH (1 M) (6.62 mL, 6.62 mmol, 5.0 equiv) was carefully added dropwise to quench the remaining

Grignard reagent. To the resulting heterogeneous mixture were added 40 mL of CH<sub>3</sub>CN (0.05 M) and iodine granules (3.99 g, 39.3 mmol, 2 equiv) and stirred vigorously for 10 min under argon atmosphere. The *o*-quinone reappeared gradually during basic oxidation. After completion, the reaction mixture was extracted with CH<sub>3</sub>CN (3 x 80 mL). The combined organic layers were washed with saturated sodium thiosulfate (1 x 80 mL), brine (2 x 80 mL) respectively. The organic layer was acidified with aqueous 2 M HCl and extracted two times (2 x 80 mL) with aqueous 2 M HCl. The combined aqueous phases were washed with hexane and concentrated *in vacuo* (Bath temp: 60 °C, 72 mbar) to afford **25** as the hydrochloride salt, (993 mg, 4.87 mmol, 62%).

### 3.6.1: Photoreactor details:

Hepatochem PhotoRedOx Box, equipped with an EvoluChem LED 18 W light source supplied by Hepatochem. A cardboard cover was also placed over the reactor during reactions. Capable of carrying out up to 8 reactions at one time. Accurate and reproducible results, high throughput.

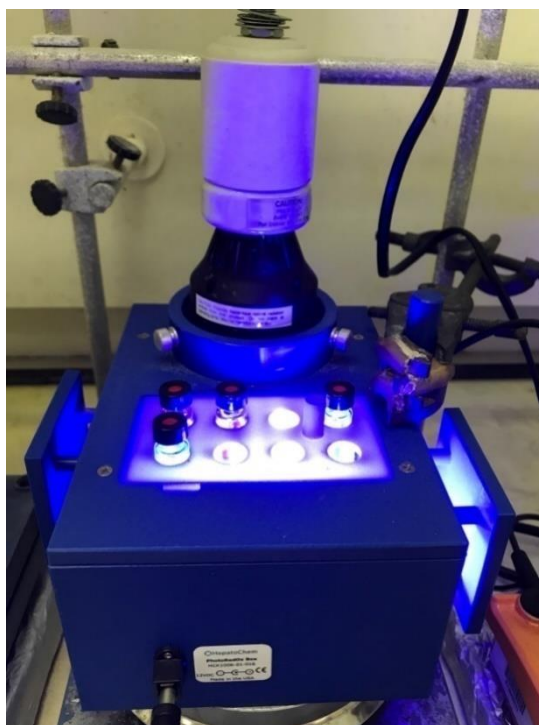

### 3.6.2: Coupling partner synthesis:

#### Synthesis of *tert*-butyl 2-((phenylsulfonyl)methyl)acrylate:

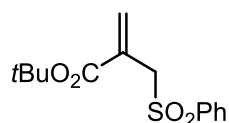

To a 1 L round-bottomed flask containing *tert*-butyl acrylate (11.7 mL, 80.0 mmol) and formaldehyde (3.60 g, 120 mmol) in 1,4-dioxane (80 mL) and water (80 mL) was added 1,4-diazabicyclo[2.2.2]octane (11.6 g, 104 mmol) portionwise. The reaction mixture was allowed to stir at room temperature for 16 h. The resulting mixture was partitioned between EtOAc (200 mL) and water (200 mL). The organic layer was extracted and then washed with brine (300 mL). The organics were then dried over MgSO<sub>4</sub> and concentrated *in vacuo*. The crude residue was then dispersed in anhydrous Et<sub>2</sub>O (300 mL) and the flask cooled to -10 °C. To the resulting mixture was added phosphorus tribromide (4.05 mL, 43.0 mmol) dropwise. The flask was allowed to warm to room temperature and stirred for 4 h. The flask was quenched by dropwise addition of water (200 mL). The resulting suspension was poured into a separating funnel and organic layer extracted. The aqueous phase was then re-extracted with pentane (2 x 200 mL). The combined organics were washed with brine, dried over MgSO<sub>4</sub> and concentrated *in vacuo*. The crude residue was dissolved in MeOH (300 mL) and was added sodium benzenesulfinate (5.50 g, 33.5 mmol) and the reaction mixture was heated to reflux for 16 h. The flask was allowed to cool for rt and then the MeOH was removed *in vacuo*. The crude residue was partitioned between EtOAc (200 mL) and water (200 mL). The organic layer was extracted and then washed with brine (300 mL), dried over MgSO<sub>4</sub> and concentrated *in vacuo*. The crude residue was purified *via* silica gel column chromatography (EtOAc:Pentane 3:7 v:v) to give the above compound as a white crystalline solid (4.90 g, 17.4 mmol, 22%). <sup>1</sup>H NMR (400 MHz, CDCl<sub>3</sub>): δ 7.88 – 7.78 (m, 2 H), 7.68 – 7.57 (m, 1 H), 7.57 – 7.43 (m, 2 H), 6.43 (d, *J* = 0.9 Hz, 1 H), 5.89 (d, *J* = 0.9 Hz, 1 H), 4.13 (d, *J* = 0.8 Hz, 2 H), 1.31 (s, 9 H). <sup>13</sup>C NMR (101 MHz, CDCl<sub>3</sub>): δ 163.8, 138.6, 133.9, 132.9, 130.4, 129.2, 129.0, 81.9, 57.5, 27.9. Data is in line with literature precedent.<sup>8</sup>

#### Synthesis of ethyl 2-((phenylsulfonyl)methyl)acrylate:

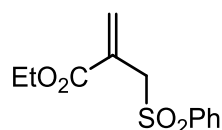

To a 1 L round-bottomed flask containing ethyl acrylate (21.8 mL, 200 mmol) and formaldehyde (9.00 g, 300 mmol) in 1,4-dioxane (200 mL) and water (200 mL) was added 1,4-diazabicyclo[2.2.2]octane (29.1 g, 260 mmol) portionwise. The reaction mixture was allowed to stir at room temperature for 16 h. The resulting mixture was partitioned between EtOAc (300 mL) and water (300 mL). The organic layer was extracted and then washed with brine (300 mL). The organics were then dried over MgSO<sub>4</sub> and concentrated *in vacuo*. The crude residue was then dispersed in anhydrous Et<sub>2</sub>O (300 mL) and the flask cooled to -10 °C. To the resulting mixture was added phosphorus tribromide (13.8 mL, 134 mmol) dropwise. The flask was allowed to warm to room temperature and stirred for 4 h. The flask was quenched by dropwise addition of water (300 mL). The resulting suspension was poured into a separating funnel and organic layer extracted. The aqueous phase was then re-extracted with pentane (2 x 300 mL). The combined organics were washed with brine, dried over MgSO<sub>4</sub> and concentrated *in vacuo*. The crude residue was dissolved in MeOH (300 mL) and was added sodium benzenesulfinate (19.4 g, 119 mmol) and the reaction mixture was heated to reflux for 16 h. The flask was allowed to cool for rt and then the MeOH was removed *in vacuo*. The crude residue was partitioned between EtOAc (300 mL) and water (300 mL). The organic layer was extracted and then washed with brine (300 mL), dried over MgSO<sub>4</sub> and concentrated *in vacuo*. The crude residue was purified *via* silica gel column chromatography (Et<sub>2</sub>O:Pentane 3:7 v:v) to give the above compound as a thick colourless oil (19.1 g, 75.1 mmol, 38%). <sup>1</sup>H NMR (400 MHz, CDCl<sub>3</sub>): δ 7.84 (dd, *J* = 8.3, 1.3 Hz, 2 H), 7.70 – 7.59 (m, 1 H), 7.59 – 7.45 (m, 2 H), 6.49 (s, 1 H), 5.90 (d, *J* = 1.0 Hz, 1 H), 4.15 (d, *J* = 0.8 Hz, 2 H), 3.99 (q, *J* = 7.1 Hz, 2 H), 1.15 (t, *J* = 7.1 Hz, 3 H). <sup>13</sup>C NMR (101 MHz, CDCl<sub>3</sub>): δ 164.8, 138.5, 133.9, 133.4, 129.2, 129.1, 128.8, 61.5, 57.6, 14.1. Data is in line with literature precedent.<sup>9</sup>

### 3.6.3: Catalyst Synthesis:

#### Synthesis of 2-(2,4-difluorophenyl)-5-(trifluoromethyl)pyridine:

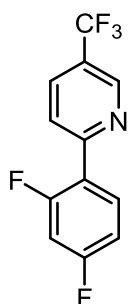

To a three-necked 250 mL round bottomed flask was charged with 2,4-difluorophenylboronic acid (5.68 g, 36.0 mmol), 2-bromo-5-trifluoromethylpyridine (6.78 g, 30.0 mmol), potassium carbonate (12.4 g, 90.0 mmol), palladium acetate (202 mg, 0.90 mmol) and triphenylphosphine (472 mg, 1.80

mmol). The flask was equipped with a condenser then evacuated and refilled with N<sub>2</sub> three times. Following this, toluene (40 mL), water (40 mL) and ethanol (8 mL) were added *via* septum. The flask was heated to reflux for 16 h. After this time, the flask was cooled to room temperature and quenched with water (100 mL). The organic phase was separated and then the aqueous phase re-extracted with Et<sub>2</sub>O (3 x 200 mL). The combined organics were washed with brine (3 x 200 mL) and then dried over MgSO<sub>4</sub> and concentrated *in vacuo*. The crude residue was then purified *via* silica gel column chromatography (EtOAc: Pentane 1:99 – 4:96 v:v) to give the title compound as a white solid (6.62 g, 25.5 mmol, 85%). <sup>1</sup>H NMR (400 MHz, CDCl<sub>3</sub>): δ 8.85 (dd, *J* = 2.4, 1.2 Hz, 1 H), 7.99 (td, *J* = 8.9, 6.6 Hz, 1 H), 7.87 (dd, *J* = 8.3, 2.4 Hz, 1 H), 7.82 – 7.76 (m, 1 H), 6.98 – 6.88 (m, 1 H), 6.82 (ddd, *J* = 11.3, 8.7, 2.5 Hz, 1 H). <sup>19</sup>F NMR (377 MHz, CDCl<sub>3</sub>): δ -62.49, -107.28 (t, *J* = 8.0 Hz), -112.04 (d, *J* = 10.0 Hz). <sup>13</sup>C NMR (101 MHz, CDCl<sub>3</sub>): δ 164.0 (dd, *J* = 252.8, 12.5 Hz), 161.1 (dd, *J* = 253.6, 12.0 Hz), 155.9, 146.7 (q, *J* = 4.2 Hz), 133.8 (q, *J* = 3.5 Hz), 132.6 (dd, *J* = 10.0, 4.2 Hz), 125.3 (q, *J* = 33.2 Hz), 123.7 (q, *J* = 272.3 Hz), 123.7 (d, *J* = 11.1 Hz), 122.5 (dd, *J* = 11.3, 3.8 Hz), 112.4 (dd, *J* = 21.1, 3.6 Hz), 106.5 – 101.0 (app t). Data was consistent with literature precedent.<sup>10</sup>

### Synthesis of [Ir(dF(CF<sub>3</sub>)ppy)<sub>2</sub>Cl]<sub>2</sub>:

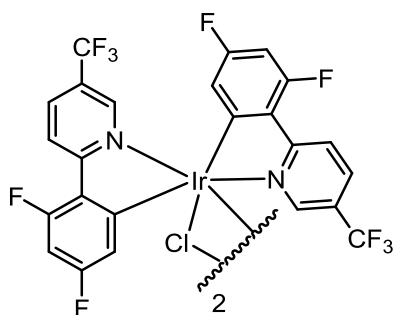

To a three-necked 100 mL round bottomed flask was charged iridium(III) chloride hydrate (448 mg, 1.50 mmol) and 2-(2,4-difluorophenyl)-5-(trifluoromethyl)pyridine (856 mg, 3.30 mmol). The flask was equipped with a condenser, then evacuated and refilled with nitrogen three times. Rigorously degassed 2-ethoxyethanol (18 mL) and water (6 mL) were added *via* syringe. The reaction mixture was heated 150 °C for 16 h. After this time the reaction mixture was allowed to return to room temperature and the bright yellow precipitate formed was filtered under a blanket of N<sub>2</sub>, washing with water (150 mL) and then hexane (60 mL), to give title compound after further removal of water *via* high vacuum (960 mg, 0.65 mmol, 86%). <sup>1</sup>H NMR (400 MHz, CDCl<sub>3</sub>): δ 9.51 (d, *J* = 2.1 Hz, 1 H), 8.46 (dd, *J* = 8.7, 3.0 Hz, 1 H), 8.05 (dd, *J* = 8.7, 2.3 Hz, 1 H), 6.43 (ddd, *J* = 12.5, 8.8, 2.3 Hz, 1 H), 5.07 (dd, *J* = 8.8, 2.3 Hz, 1 H). <sup>19</sup>F NMR (377 MHz, CDCl<sub>3</sub>): δ -62.36 (12 F), -103.41 – -103.72 (m, 4 F), -106.97 – -107.91 (m, 4 F). Data was consistent with literature precedent.<sup>10</sup>



### Synthesis of $[\text{Ir}(\text{dF}(\text{CF}_3)\text{ppy})_2(\text{dtbpy})]\text{PF}_6 - [\text{Ir}]$ :

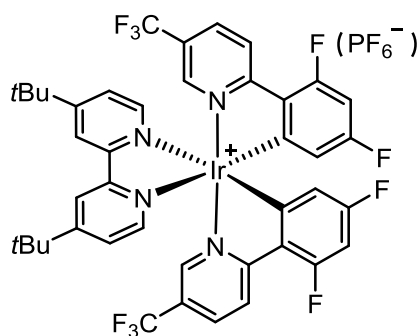

To a three-necked 250 mL round bottomed flask was charged  $[\text{Ir}(\text{dF}(\text{CF}_3)\text{ppy})_2\text{Cl}]_2$  (960 mg, 0.65 mmol) and 4,4'-di-*tert*-butyl-2,2'-dipyridyl (429 mg, 1.60 mmol). The flask was equipped with a reflux condenser, then evacuated and refilled three times with nitrogen. Rigorously degassed ethylene glycol (44 mL) was then added *via* syringe. The reaction mixture was then heated to 150 °C for 16 h. After this time the flask was allowed to return to room temperature. The mixture was diluted in water (300 mL) and hexane (300 mL). The aqueous phase was then separated and then re-extracted with hexane (2 x 300 mL). The aqueous phase was then decanted into a 500 mL conical flask and equipped with a stirrer bar. The flask was heated at 80 °C for 1 hour to remove residual hexane. The flask was allowed to return to room temperature, and an aqueous solution of potassium hexafluorophosphate (7 g in 70 mL water) was added with stirring, and a vibrant yellow precipitate was formed. The mixture was then allowed to stand at 5 °C for 1 hour, before the precipitate was collected *via* vacuum filtration washing with water (150 mL) and hexane (100 mL). The collected powdery solid was then subjected to further water removal *via* high vacuum, to give the title compound, (915 mg, 0.82 mmol, 63%).  $^1\text{H NMR}$  (400 MHz,  $\text{CDCl}_3$ ):  $\delta$  8.88 (d,  $J = 2.1$  Hz, 2 H), 8.47 (dd,  $J = 8.7, 3.1$  Hz, 2 H), 8.04 (dd,  $J = 8.8, 2.1$  Hz, 2 H), 7.86 (d,  $J = 5.9$  Hz, 2 H), 7.59 (dd,  $J = 5.9, 1.9$  Hz, 2 H), 7.41 (s, 2 H), 6.64 (ddd,  $J = 11.6, 8.9, 2.3$  Hz, 2 H), 5.63 (dd,  $J = 8.0, 2.4$  Hz, 2 H), 1.50 (s, 18 H).  $^{19}\text{F NMR}$  (377 MHz,  $\text{CDCl}_3$ ):  $\delta$  -62.99 (6 F), -72.24 (3 F), -74.13 (3 F), -101.81 (dt,  $J = 12.4, 8.4$  Hz, 2 F), -105.92 (td,  $J = 12.4, 3.4$  Hz, 2 F). NMR Spectra matched those from commercial sources.

#### 4: Demonstration of stepwise procedure for one-pot operation:

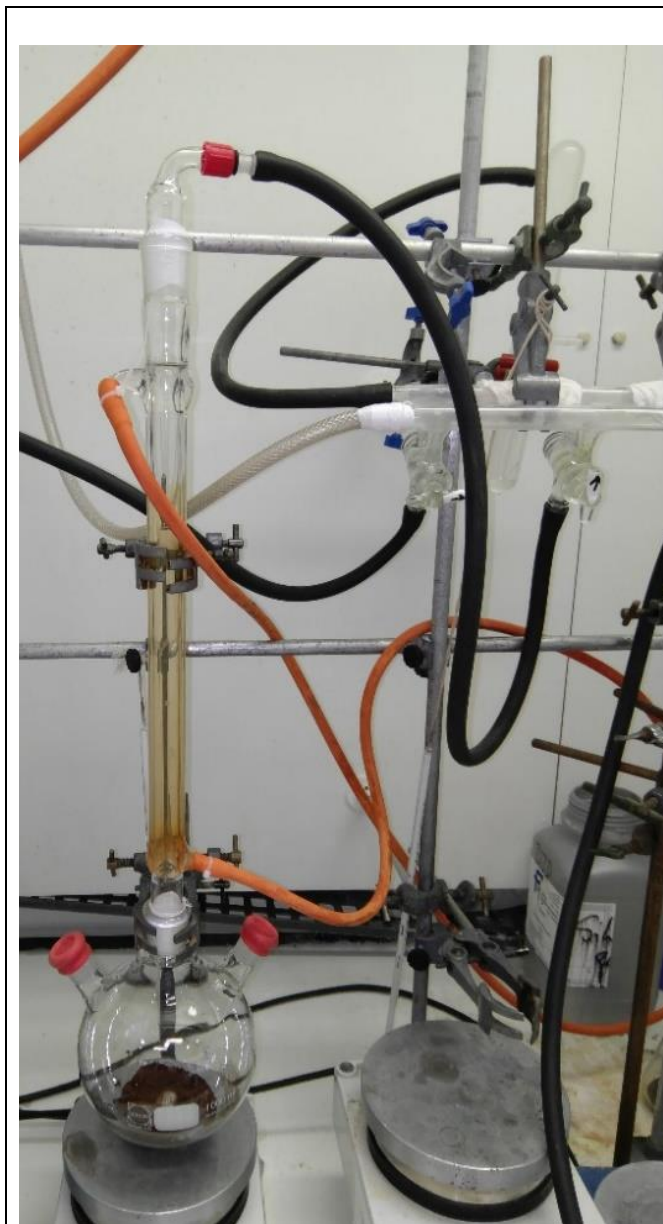

##### Reaction setup:

**Step 1:**  
**(ketimine/hemiaminal formation):** *o*-quinone (6.60 g, 30.0 mmol) was placed in a 3 neck round bottom flask (1000 ml), which was connected to a reflux condenser and argon. The evacuate/refill cycle was repeated 2-3 times before the addition of dry toluene and the whole setup was maintained under argon.

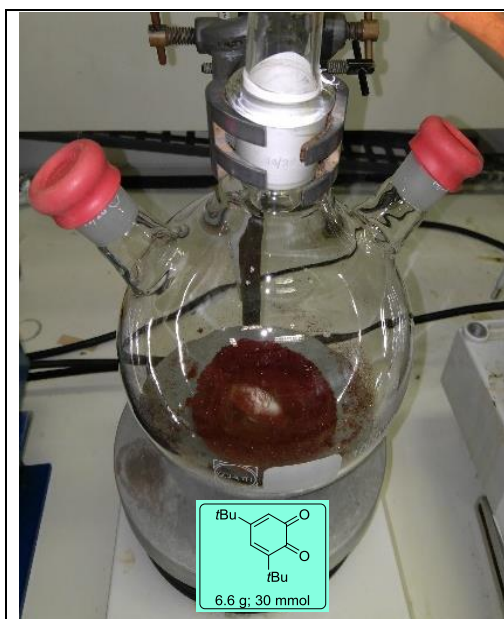

Close view of *o*-quinone.

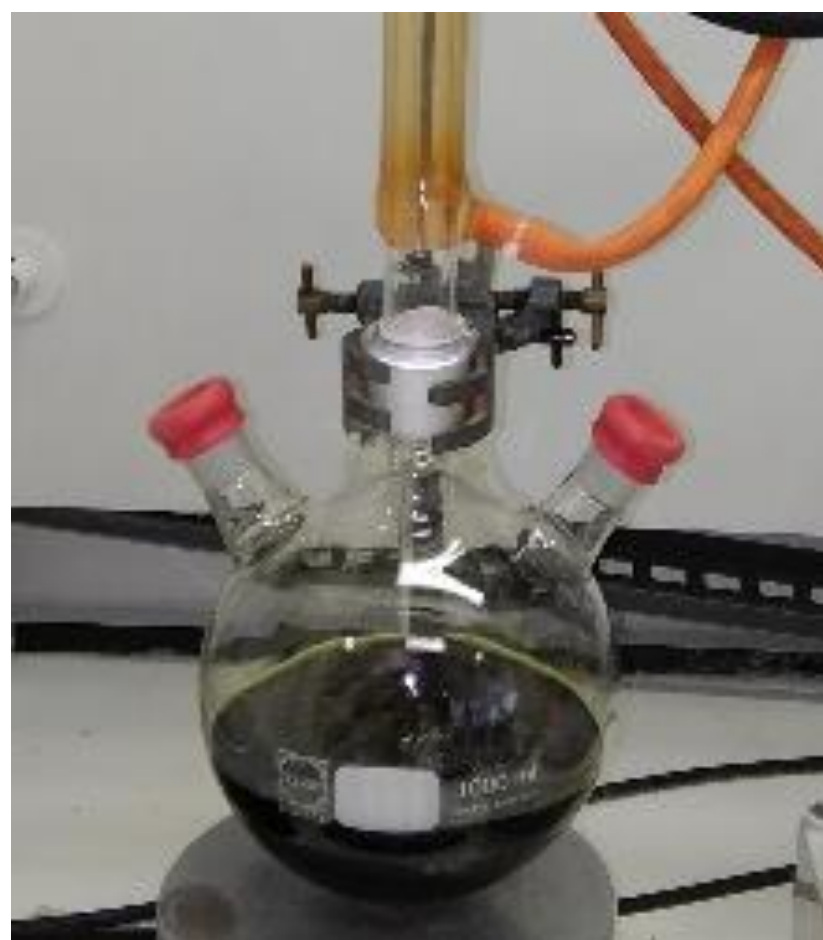

Addition of toluene

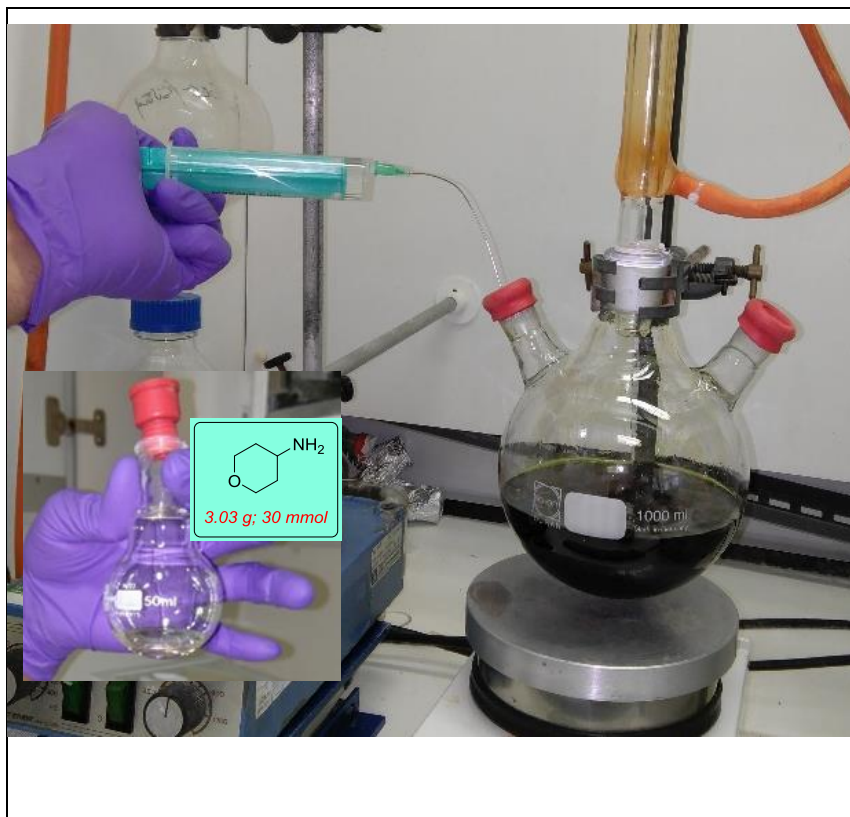

Addition of 4-aminotetrahydropyran in toluene at 25 °C. (Inside Picture: 4-aminotetrahydropyran, 3.03 g; 30.0 mmol).

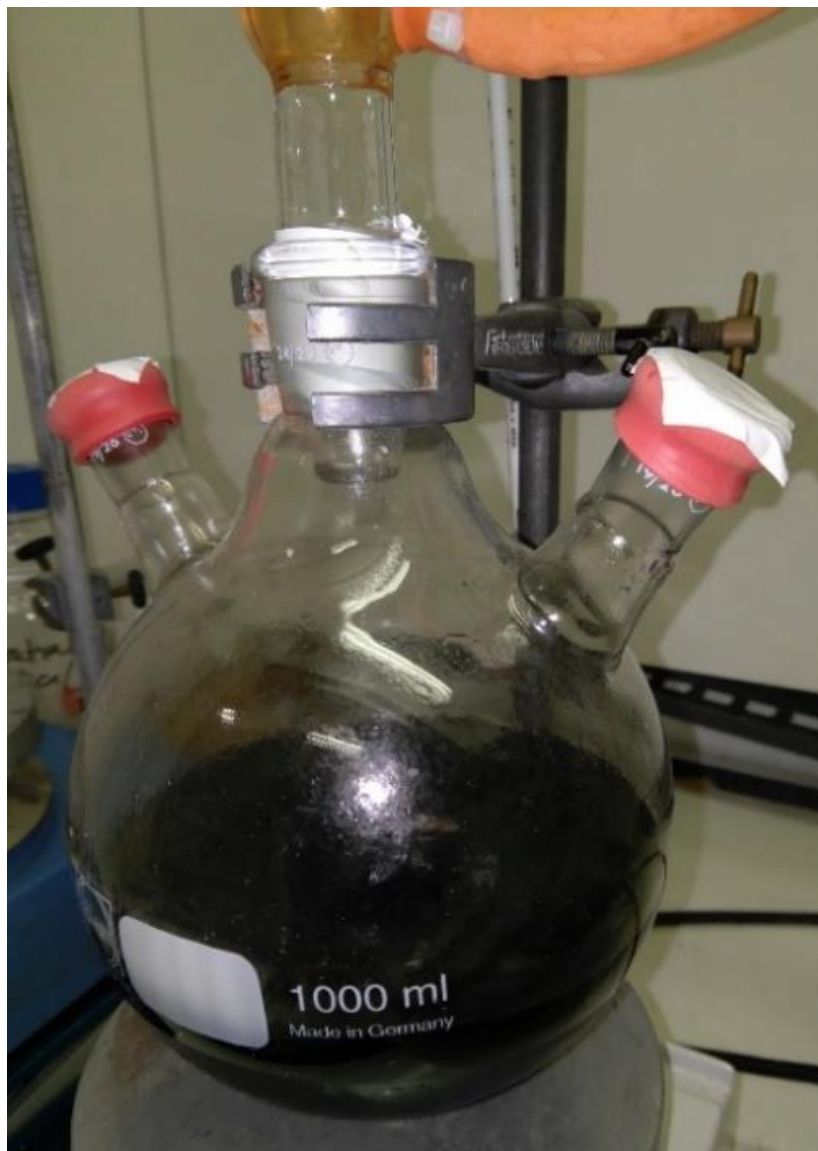

Completion of ketimine/hemiaminal formation. (**Note:** the colour changes from deep green (o-quinone) to violet (ketimine/hemiaminal) during the course of reaction).

**Ketimine/hemiaminal formation:**

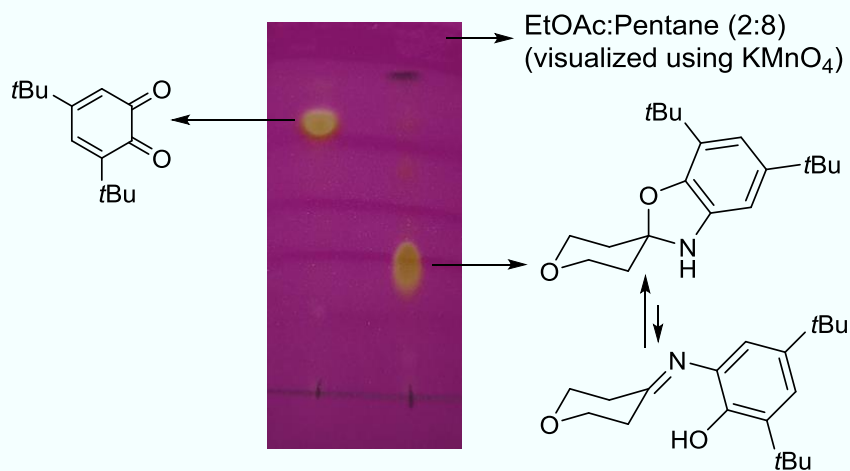

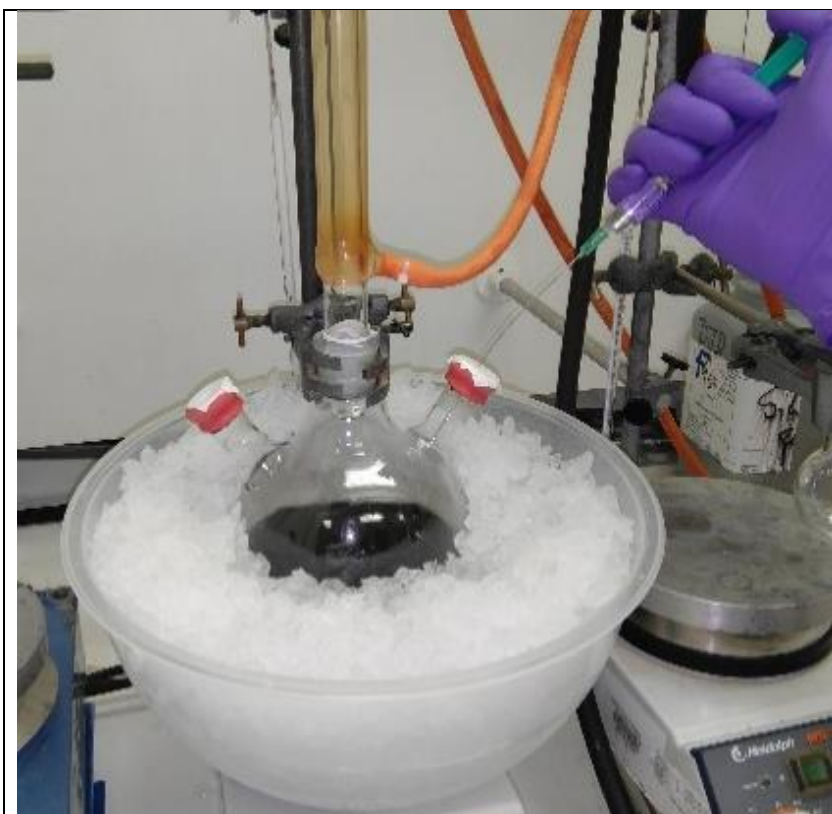

**Step 2: (Allylation):**

Addition of TMEDA at 0 °C in neat form.

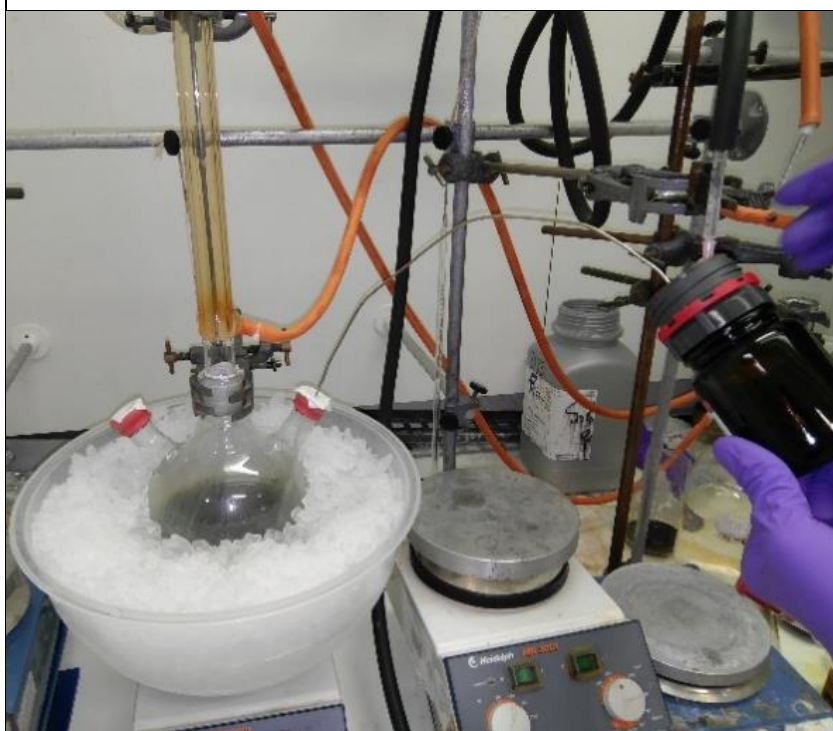

Addition of allylmagnesium bromide (1.0 M in Et<sub>2</sub>O) via cannula.

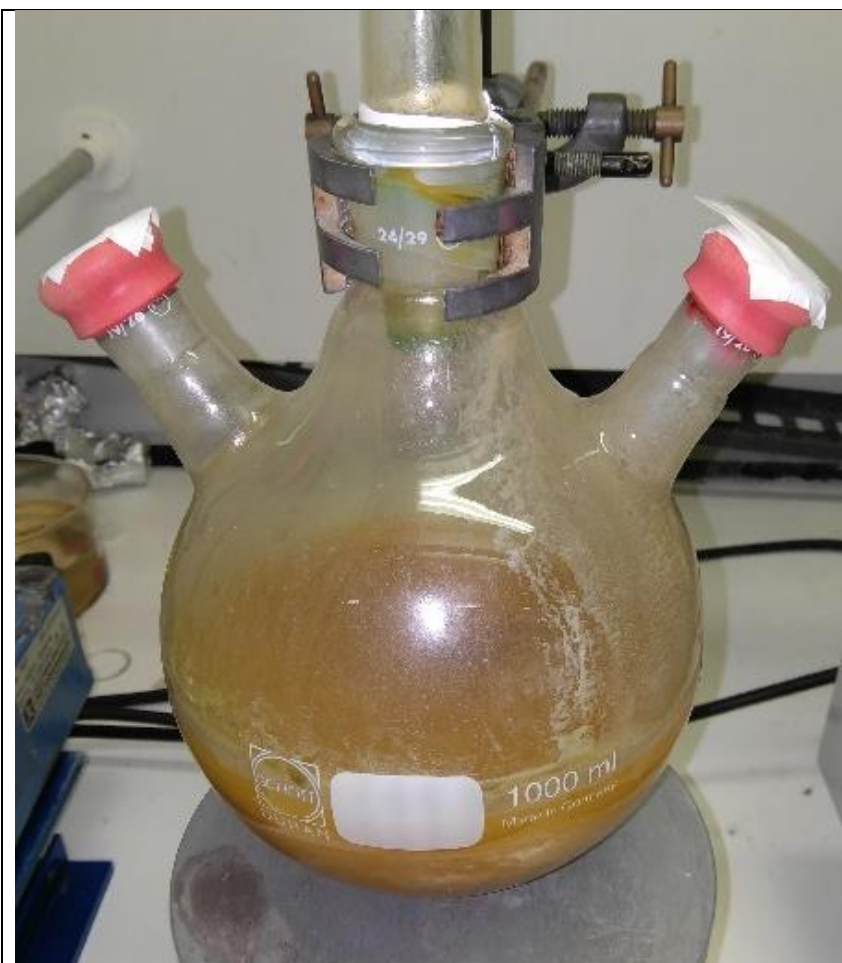

Completion of allylation.  
**Note:** (violet to yellow colouration).

**Allylation: (A small aliquot was worked up in  $\text{NH}_4\text{Cl}$ -EtOAc for TLC)**

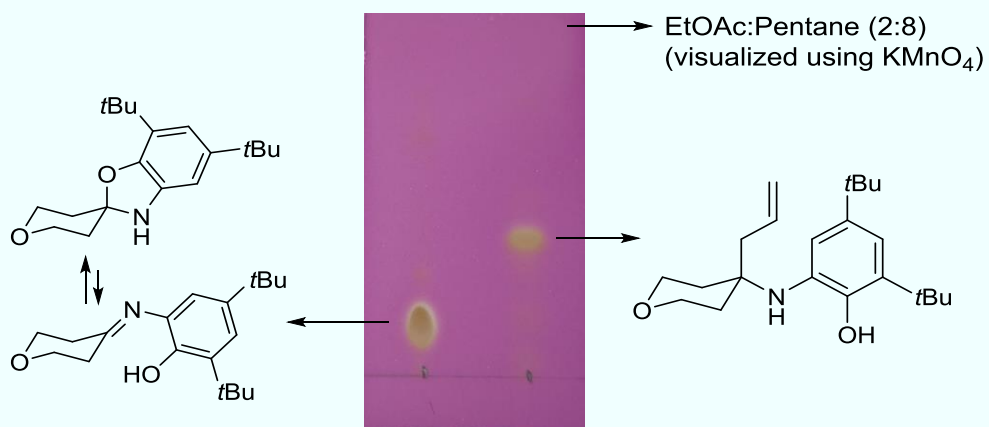

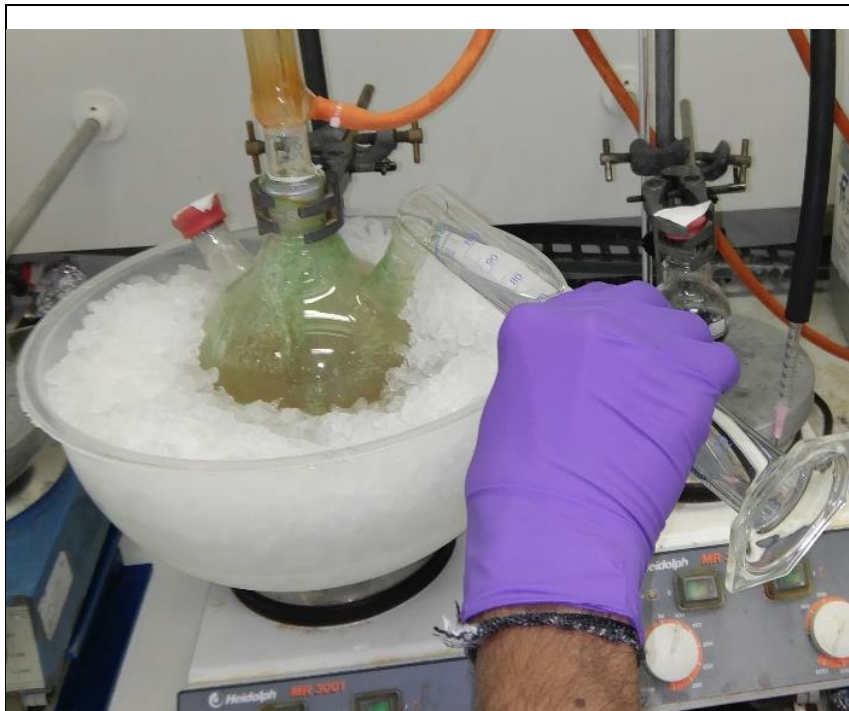

**Step 3: Oxidative cleavage:**

Quenching the remaining RMgX by the addition of 1M NaOH (150 mL) at 0 °C under argon atmosphere.

**Note:** Care must be taken while addition due to vigorous reaction.

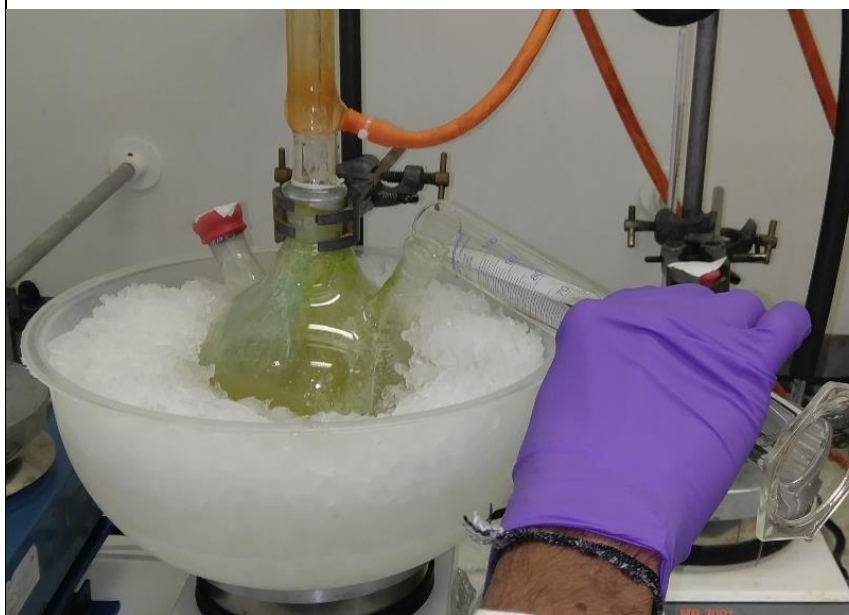

Addition of CH<sub>3</sub>CN (300 mL).



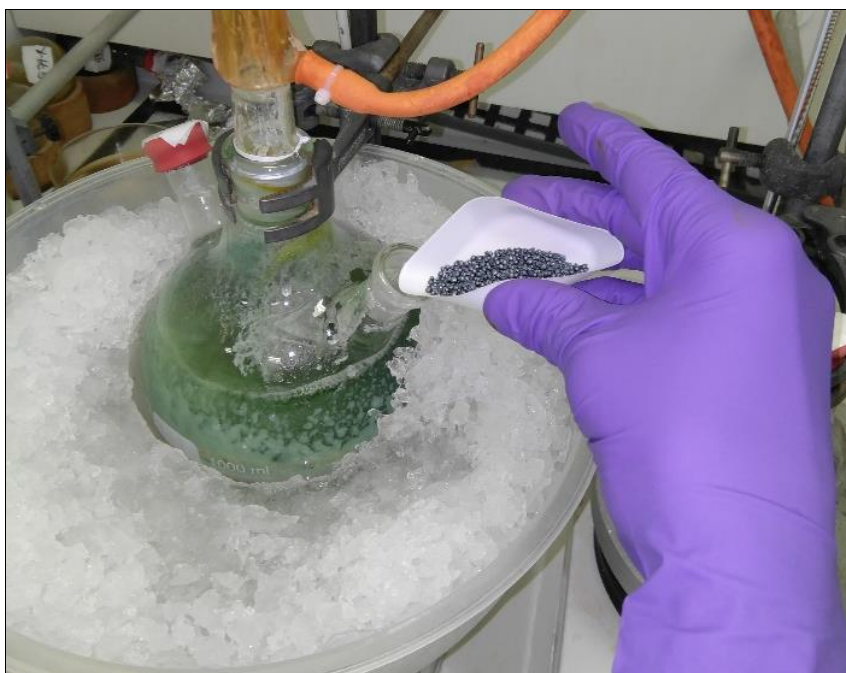

Addition of Iodine (7.62 g,  
30.0 mmol)

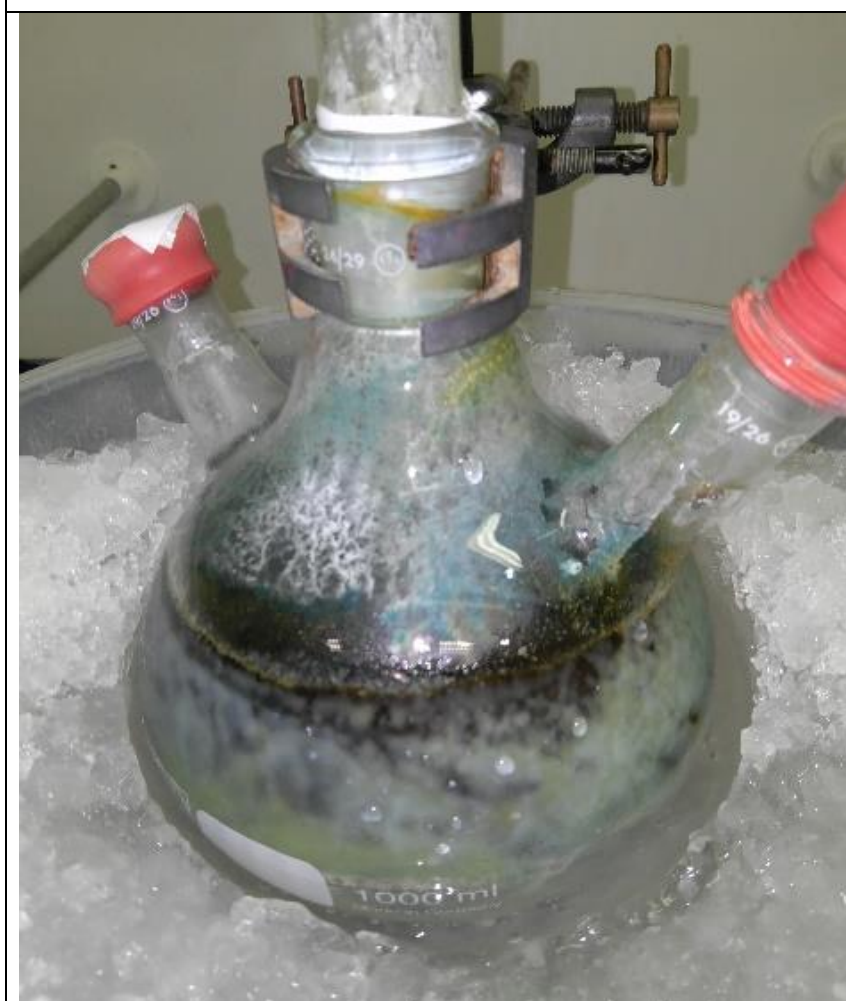

Completion of oxidation  
**Note:** (green to orange)

**Oxidative Cleavage:**

**TLC Solvent System:**  
EtOAc: Pentane (2:8)  
(visualized using  $\text{KMnO}_4$ )

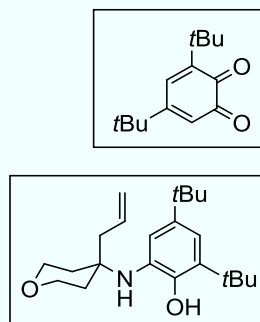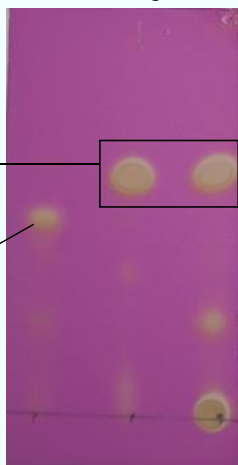

**TLC Solvent System:**  
MeOH:EtOAc (2:8)  
(visualized using  $\text{KMnO}_4$ )

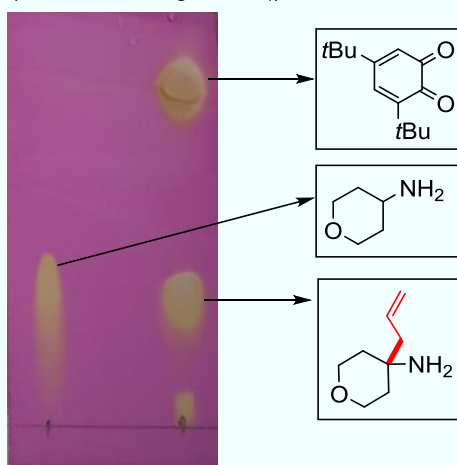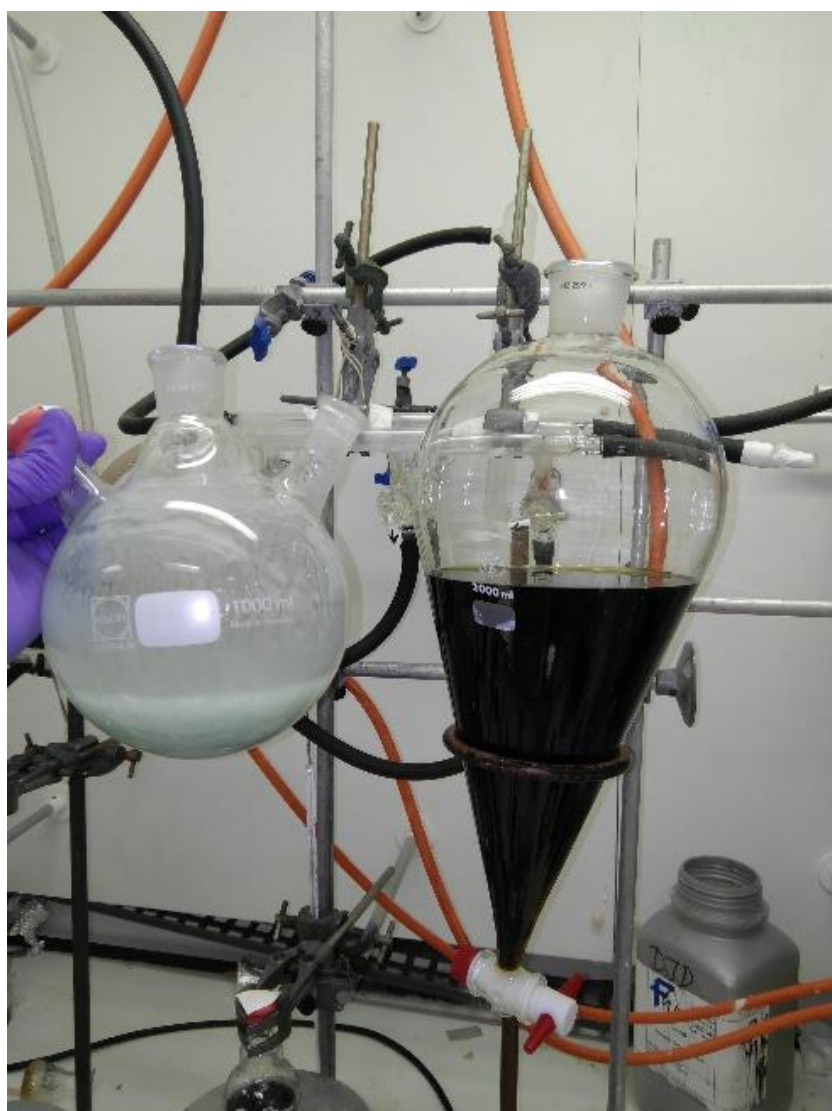

**Work up:**

Separation of Organic layer from the heterogeneous mixture using  $\text{CH}_3\text{CN}$ .

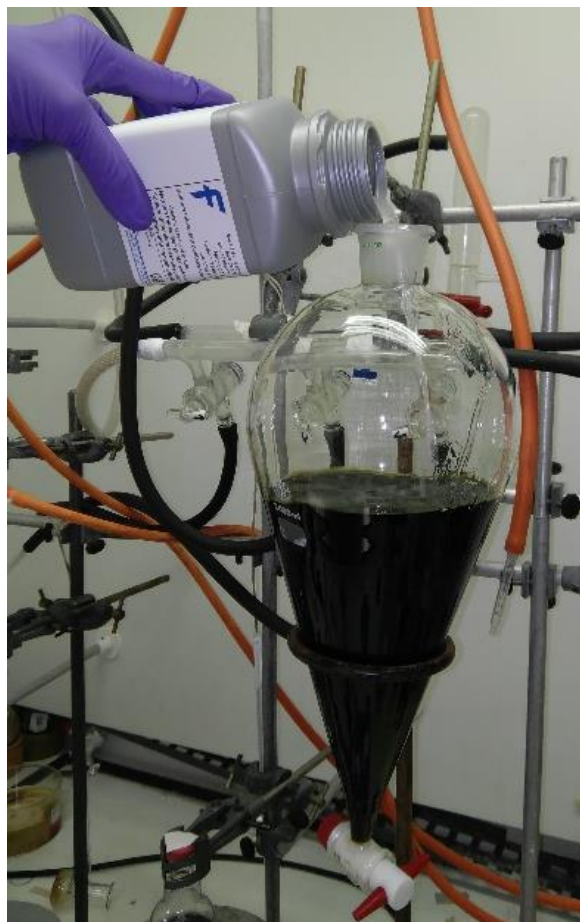

Organic layer was washed with saturated sodium thiosulphate (1 x 50 mL) to remove iodine.

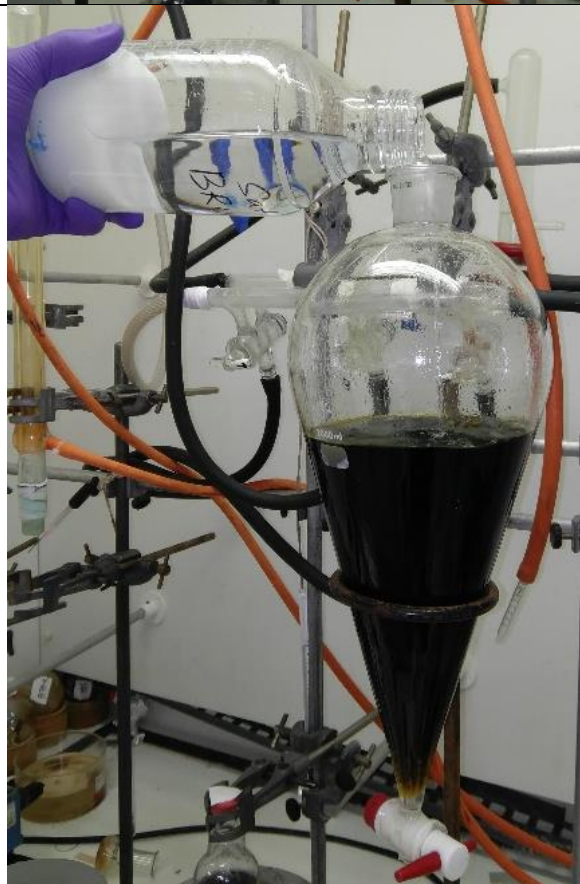

Washed with brine twice (2 x 50 mL) to remove TMEDA and any residual iodinated species.

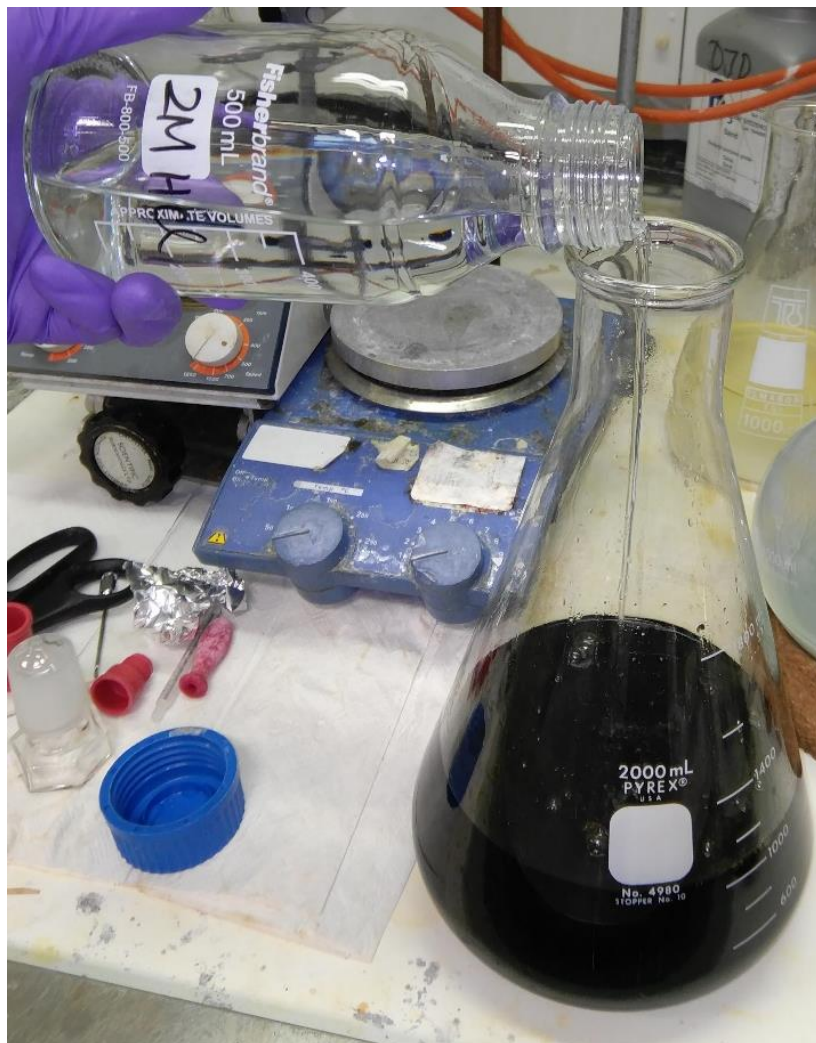

Organic layer was acidified directly with 2 M HCl (**General Procedure B**). For **General Procedure A and C**; the resulting organic layer was dried and condensed *via vacuo*, followed by column chromatography.

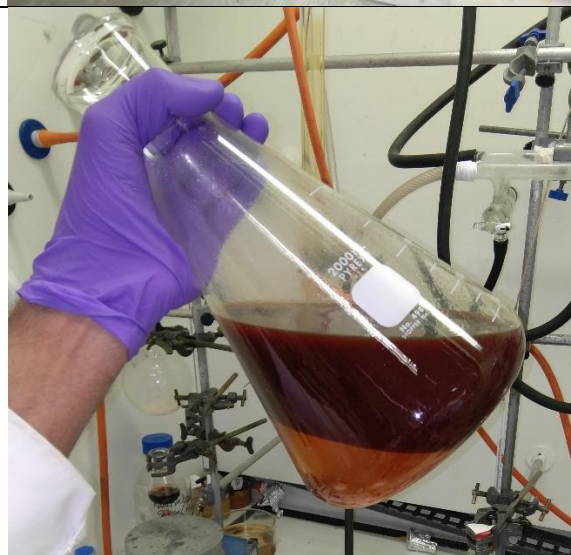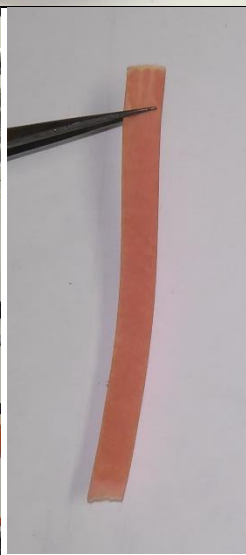

Dispersion of aqueous acidic phase from organic phase; and conformation of its acidity using pH paper.

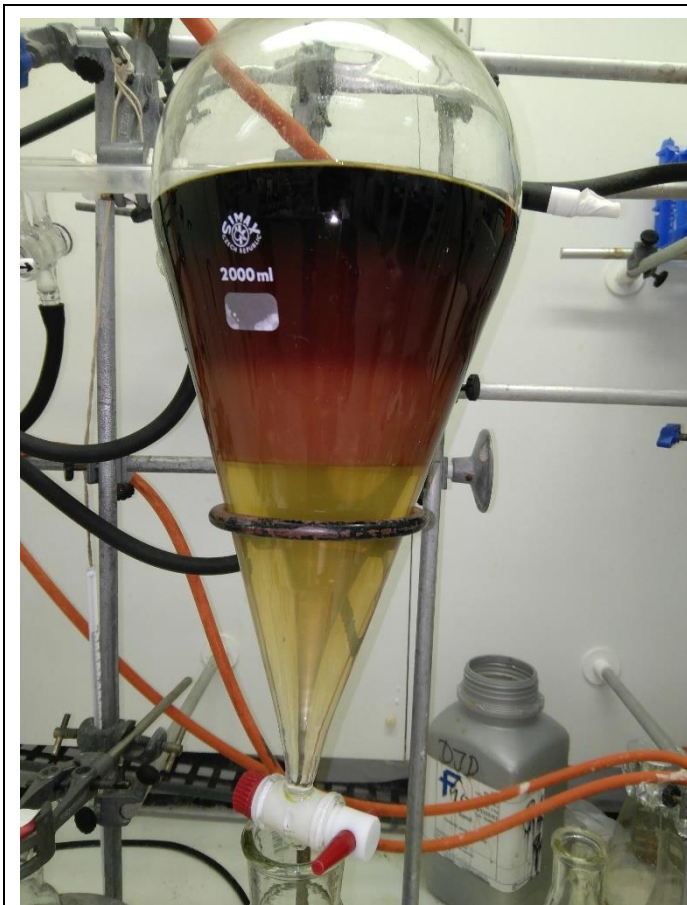

Partitioned between aqueous and organic layers

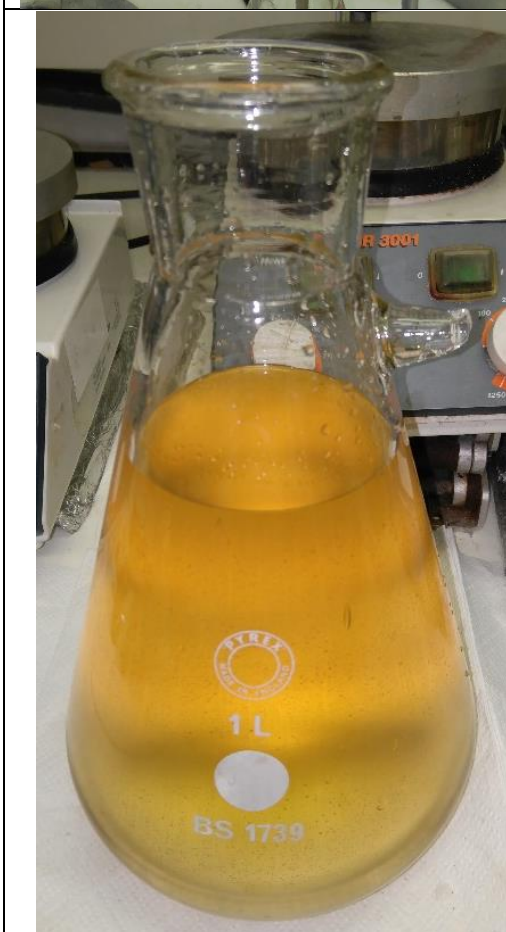

Separation of aqueous acidic phase from organic phase and followed by further extraction twice with 2M aqueous HCl (2 x 250 mL).

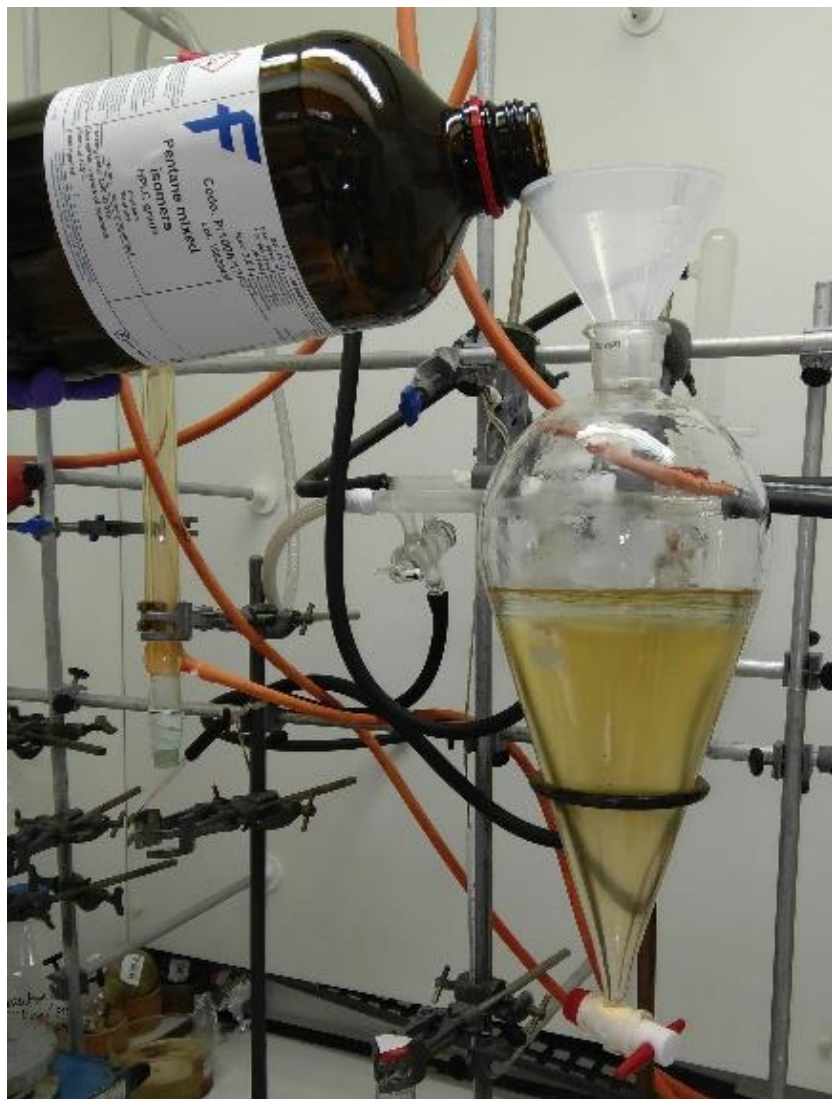

The aqueous acidic phase was washed with pentane to remove any  $I_2$  impurity.

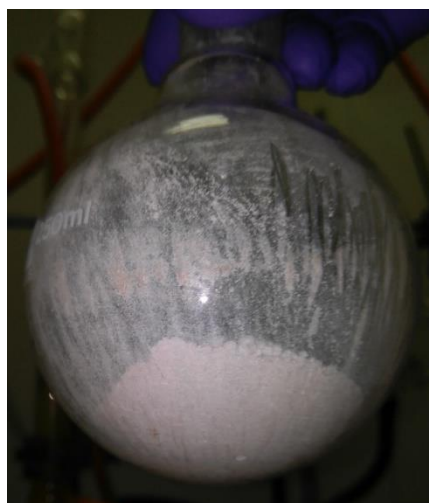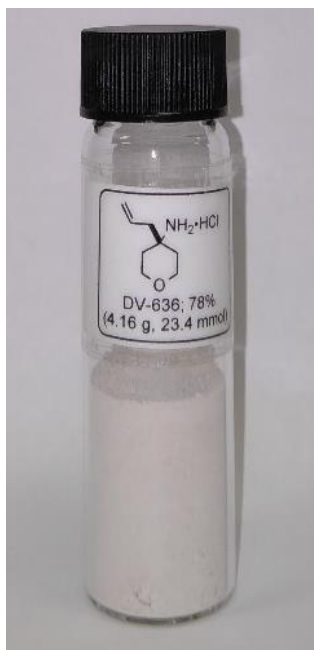

Evaporation of aqueous acidic phase by rotary evaporator gave ammonium salt **27** as off-white powder (4.16 g, 23.4 mmol, 78%).

## 5: Spectral data for $\alpha$ -functionalized products (1-68):

### Synthesis of 2-(4-methoxyphenyl)pent-4-en-2-amine (1)

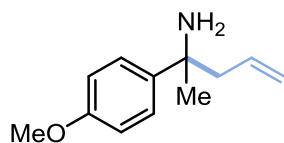

The title compound was prepared using **General Procedure A**. The cleavage of phenol unit was performed by using 3 equiv of  $I_2$  and 5 equiv NaOH (1 M). Yellow oil (205 mg, 1.07 mmol, 81%). **FT-IR** (thin film)  $\nu_{\max}$  ( $\text{cm}^{-1}$ ): 3073, 2962, 1610, 1511, 1247, 1034, 830.  **$^1\text{H NMR}$**  (400 MHz,  $\text{CDCl}_3$ ):  $\delta$  7.37 (d,  $J = 8.8$  Hz, 2 H), 6.86 (d,  $J = 8.8$  Hz, 2 H), 5.57 (dddd,  $J = 17.0, 10.2, 7.9, 6.8$  Hz, 1 H), 5.09 – 5.03 (m, 2 H), 3.80 (s, 3 H), 2.53 (ddt,  $J = 13.5, 6.8, 1.3$  Hz, 1 H), 2.39 (ddt,  $J = 13.5, 7.8, 1.1$  Hz, 1 H), 1.57 (br s, 2 H,  $\text{NH}_2$ ), 1.45 (s, 3 H).  **$^{13}\text{C NMR}$**  (101 MHz,  $\text{CDCl}_3$ ):  $\delta$  158.0, 140.7, 134.5, 126.4, 118.5, 113.5, 55.3, 54.3, 49.8, 31.0. **HRMS** (ESI) Calcd for  $\text{C}_{12}\text{H}_{15}\text{O}$  [ $\text{M}-\text{NH}_2$ ]: 175.1117, found: 175.1118.

### Synthesis of 2-phenylpent-4-en-2-amine (2)

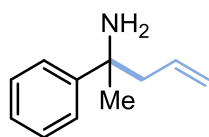

The title compound was prepared using **General Procedure A**. Brown oil (125 mg, 0.77 mmol, 94%). **FT-IR** (thin film)  $\nu_{\max}$  ( $\text{cm}^{-1}$ ): 3060, 2925, 1639, 1445, 1197, 917, 766, 699.  **$^1\text{H NMR}$**  (400 MHz,  $\text{CDCl}_3$ ):  $\delta$  7.49 – 7.45 (m, 2 H), 7.36 – 7.31 (m, 2 H), 7.25 – 7.20 (m, 1 H), 5.56 (dddd,  $J = 17.0, 10.1, 7.9, 6.8$  Hz, 1 H), 5.11 – 5.04 (m, 2 H), 2.62 – 2.44 (m, 4 H,  $\text{CH}_2, \text{NH}_2$ ), 1.50 (s, 3 H).  **$^{13}\text{C NMR}$**  (101 MHz,  $\text{CDCl}_3$ ):  $\delta$  147.9, 134.1, 128.3, 126.5, 125.3, 118.9, 55.2, 49.4, 30.4. **HRMS** (ESI) Calcd for  $\text{C}_{11}\text{H}_{16}\text{N}$  [ $(\text{M}+\text{H})^+$ ]: 162.1277, found: 162.1278.

### Synthesis of 1,1-diphenylbut-3-en-1-amine (3)

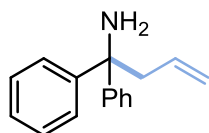

The title compound was prepared using **General Procedure A**. Yellow semi-solid (211 mg, 0.95 mmol, 80%). **FT-IR** (thin film)  $\nu_{\max}$  ( $\text{cm}^{-1}$ ): 3059, 2980, 1598, 1492, 1445, 1156, 917, 755, 698.  **$^1\text{H NMR}$**  (400 MHz,  $\text{CDCl}_3$ ):  $\delta$  7.43 – 7.40 (m, 4 H), 7.34 – 7.30 (m, 4 H), 7.25 – 7.20 (m, 2 H), 5.55 (dddd,  $J = 16.6, 10.2, 7.6, 6.8$  Hz, 1 H), 5.22 – 5.10 (m, 2 H), 3.05 (dt,  $J = 7.1, 1.2$  Hz, 2 H), 1.87 (br s, 2 H,  $\text{NH}_2$ ).

$^{13}\text{C}$  NMR (101 MHz,  $\text{CDCl}_3$ ):  $\delta$  148.2, 134.2, 128.2, 126.7, 126.5, 119.3, 60.3, 47.6. HRMS (ESI) Calcd for  $\text{C}_{16}\text{H}_{15}$   $[\text{M}-\text{NH}_2]$ : 207.1168, found: 207.1170.

#### Synthesis of 2-(2-methoxyphenyl)pent-4-en-2-amine (4)

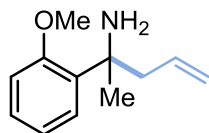

The title compound was prepared using **General Procedure A**. The cleavage of phenol unit was performed by using 3 equiv of  $\text{I}_2$  and 5 equiv NaOH (1 M). Viscous yellow oil (160 mg, 0.84 mmol, 63%). FT-IR (thin film)  $\nu_{\text{max}}$  ( $\text{cm}^{-1}$ ): 3375, 3073, 2934, 1582, 1488, 1234, 1027, 753.  $^1\text{H}$  NMR (400 MHz,  $\text{CDCl}_3$ ):  $\delta$  7.31 (dd,  $J = 7.7, 1.8$  Hz, 1 H), 7.26 – 7.20 (m, 1 H), 6.94 – 6.89 (m, 2 H), 5.57 – 5.48 (m, 1 H), 5.04 – 4.94 (m, 2 H), 3.87 (s, 3 H), 2.75 – 2.62 (m, 2 H), 2.26 (br s, 2 H,  $\text{NH}_2$ ), 1.50 (s, 3 H).  $^{13}\text{C}$  NMR (101 MHz,  $\text{CDCl}_3$ ):  $\delta$  157.6, 135.7, 135.5, 128.0, 126.9, 120.6, 117.5, 111.5, 55.2, 55.0, 46.6, 28.0. HRMS (ESI) Calcd for  $\text{C}_{12}\text{H}_{18}\text{NO}$   $[(\text{M}+\text{H})^+]$ : 192.1383, found: 192.1382.

#### Synthesis of 2-(3-methoxyphenyl)pent-4-en-2-amine (5)

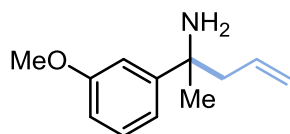

The title compound was prepared using **General Procedure A**. The cleavage of phenol unit was performed by using 3 equiv of  $\text{I}_2$  and 5 equiv NaOH (1 M). Yellow oil (197 mg, 1.03 mmol, 78%). FT-IR (thin film)  $\nu_{\text{max}}$  ( $\text{cm}^{-1}$ ): 3074, 2924, 1582, 1431, 1244, 1045, 781, 702.  $^1\text{H}$  NMR (400 MHz,  $\text{CDCl}_3$ ):  $\delta$  7.27 – 7.23 (m, 1 H), 7.04 – 7.01 (m, 2 H), 6.77 – 6.75 (m, 1 H), 5.56 (dddd,  $J = 17.0, 10.1, 8.0, 6.7$  Hz, 1 H), 5.10 – 5.03 (m, 2 H), 3.80 (s, 3 H), 2.57 (ddt,  $J = 13.6, 6.7, 1.3$  Hz, 1 H), 2.42 (ddt,  $J = 13.6, 8.1, 1.1$  Hz, 1 H), 2.06 (br s, 2 H,  $\text{NH}_2$ ), 1.46 (s, 3 H).  $^{13}\text{C}$  NMR (101 MHz,  $\text{CDCl}_3$ ):  $\delta$  159.6, 150.2, 134.2, 129.2, 118.7, 117.8, 111.7, 111.2, 55.3, 54.9, 49.5, 30.7. HRMS (ESI) Calcd for  $\text{C}_{12}\text{H}_{18}\text{NO}$   $[(\text{M}+\text{H})^+]$ : 192.1383, found: 192.1385.

#### Synthesis of 2-(*p*-tolyl)pent-4-en-2-amine (6)

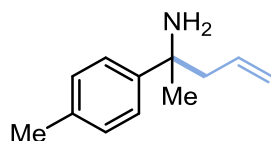

The title compound was prepared using **General Procedure A**. Yellow oil (174 mg, 0.99 mmol, 67%). FT-IR (thin film)  $\nu_{\text{max}}$  ( $\text{cm}^{-1}$ ): 2980, 2923, 1639, 1513, 914, 816.  $^1\text{H}$  NMR (400 MHz,  $\text{CDCl}_3$ ):  $\delta$  7.36 (d,  $J$



= 8.3 Hz, 2 H), 7.15 (d,  $J = 8.3$  Hz, 2 H), 5.59 (dddd,  $J = 17.0, 10.1, 7.9, 6.7$  Hz, 1 H), 5.11 – 5.04 (m, 2 H), 2.56 (ddt,  $J = 13.5, 6.7, 1.2$  Hz, 1 H), 2.41 (ddt,  $J = 13.5, 7.8, 1.1$  Hz, 1 H), 2.34 (s, 3 H), 1.53 (br s, 2 H, NH<sub>2</sub>), 1.46 (s, 3 H). <sup>13</sup>C NMR (101 MHz, CDCl<sub>3</sub>): δ 145.9, 135.7, 134.6, 128.9, 125.2, 118.4, 54.4, 49.8, 31.1, 21.0. HRMS (ESI) Calcd for C<sub>12</sub>H<sub>18</sub>N [(M+H)<sup>+</sup>]: 176.1434, found: 176.1435.

### Synthesis of 4-(2-aminopent-4-en-2-yl)phenol hydrochloride (7)

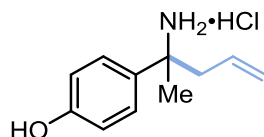

The title compound was prepared using **General Procedure B**. A mixture of Toluene:THF (5:1)(0.1 M) was used to improve the solubility of starting material for ketimine formation. Yellow solid (184 mg, 0.86 mmol, 59%). FT-IR (thin film)  $\nu_{\max}$  (cm<sup>-1</sup>): 3401, 3025, 2922, 1614, 1519, 1224, 1188, 833. <sup>1</sup>H NMR (400 MHz, CD<sub>3</sub>OD): δ 7.31 (d,  $J = 8.8$  Hz, 2 H), 6.86 (d,  $J = 8.8$  Hz, 2 H), 5.54 (ddt,  $J = 17.3, 10.1, 7.2$  Hz, 1 H), 5.23 – 5.14 (m, 2 H), 2.81 – 2.69 (m, 2 H), 1.69 (s, 3 H). <sup>13</sup>C NMR (101 MHz, CD<sub>3</sub>OD): δ 158.8, 132.3, 131.8, 127.6, 121.3, 116.6, 59.2, 46.5, 25.1. HRMS (ESI) Calcd for C<sub>11</sub>H<sub>13</sub>O [M-NH<sub>3</sub>Cl]: 161.0961, found: 161.0961.

### Synthesis of 2-(4-fluorophenyl)pent-4-en-2-amine (8)

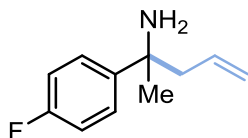

The title compound was prepared using **General Procedure A**. Brown oil (183 mg, 1.02 mmol, 71%). FT-IR (thin film)  $\nu_{\max}$  (cm<sup>-1</sup>): 2980, 1601, 1509, 1225, 919, 834. <sup>1</sup>H NMR (400 MHz, CDCl<sub>3</sub>): δ 7.42 (dd,  $J = 8.9, 5.3$  Hz, 2 H), 6.99 (t,  $J = 8.7$  Hz, 2 H), 5.53 (dddd,  $J = 16.6, 10.5, 7.8, 6.8$  Hz, 1 H), 5.08 – 5.03 (m, 2 H), 2.54 (ddt,  $J = 13.6, 6.9, 1.2$  Hz, 1 H), 2.41 (ddt,  $J = 13.6, 7.9, 1.0$  Hz, 1 H), 2.28 (br s, 2 H, NH<sub>2</sub>), 1.46 (s, 3 H). <sup>19</sup>F NMR (377 MHz, CDCl<sub>3</sub>): δ -117.2 (d,  $J = 11.6$  Hz). <sup>13</sup>C NMR (101 MHz, CDCl<sub>3</sub>): δ 161.5 (d,  $J_{C-F} = 245.6$  Hz), 143.7 (d,  $J_{C-F} = 3.2$  Hz), 133.8, 127.0 (d,  $J_{C-F} = 7.9$  Hz), 119.0, 114.9 (d,  $J_{C-F} = 21.1$  Hz), 54.8, 49.6, 30.7. HRMS (ESI) Calcd for C<sub>11</sub>H<sub>15</sub>NF [(M+H)<sup>+</sup>]: 180.1183, found: 180.1182.

### Synthesis of 2-(4-chlorophenyl)pent-4-en-2-amine (9)

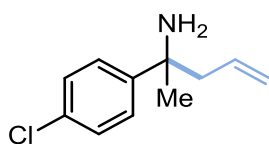

The title compound was prepared using **General Procedure A**. Yellow oil (171 mg, 0.87 mmol, 68%). **FT-IR** (thin film)  $\nu_{\max}$  ( $\text{cm}^{-1}$ ): 3075, 2923, 2849, 1639, 1490, 1195, 918, 826.  **$^1\text{H NMR}$**  (400 MHz,  $\text{CDCl}_3$ ):  $\delta$  7.32 (d,  $J = 8.7$  Hz, 2 H), 7.21 (d,  $J = 8.7$  Hz, 2 H), 5.45 (dddd,  $J = 16.5, 10.8, 7.9, 6.8$  Hz, 1 H), 5.02 – 4.96 (m, 2 H), 2.47 (ddt,  $J = 13.6, 6.8, 1.2$  Hz, 1 H), 2.33 (ddt,  $J = 13.6, 7.9, 1.0$  Hz, 1 H), 2.03 (br s, 2 H,  $\text{NH}_2$ ), 1.39 (s, 3 H).  **$^{13}\text{C NMR}$**  (101 MHz,  $\text{CDCl}_3$ ):  $\delta$  146.7, 133.7, 132.2, 128.3, 126.9, 119.2, 54.8, 49.5, 30.7. **HRMS** (ESI) Calcd for  $\text{C}_{11}\text{H}_{15}\text{N}_3\text{Cl}$  [(M+H) $^+$ ]: 196.0888, found: 196.0888.

### Synthesis of 2-(4-bromophenyl)pent-4-en-2-amine (10)

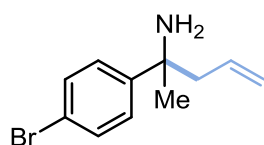

The title compound was prepared using **General Procedure A**. Pale brown oil (159 mg, 0.66 mmol, 66%). **FT-IR** (thin film)  $\nu_{\max}$  ( $\text{cm}^{-1}$ ): 3075, 2965, 2924, 1639, 1484, 1007, 918, 822.  **$^1\text{H NMR}$**  (400 MHz,  $\text{CDCl}_3$ ):  $\delta$  7.43 (d,  $J = 8.6$  Hz, 2 H), 7.33 (d,  $J = 8.6$  Hz, 2 H), 5.58 – 5.48 (m, 1 H), 5.08 – 5.02 (m, 2 H), 2.52 (ddt,  $J = 13.6, 6.9, 1.2$  Hz, 1 H), 2.37 (ddt,  $J = 13.6, 7.9, 1.1$  Hz, 1 H), 1.64 (br s, 2 H,  $\text{NH}_2$ ), 1.43 (s, 3 H).  **$^{13}\text{C NMR}$**  (101 MHz,  $\text{CDCl}_3$ ):  $\delta$  147.7, 133.9, 131.2, 127.3, 120.2, 119.0, 54.6, 49.7, 30.9. **HRMS** (ESI) Calcd for  $\text{C}_{11}\text{H}_{15}\text{N}_79\text{Br}$  [(M+H) $^+$ ]: 240.0382, found: 240.0381.

### Synthesis of 4-(4-fluorophenyl)hepta-1,6-dien-4-amine (11)

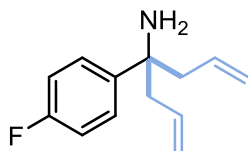

The title compound was prepared using 2-amino-2-(4-fluorophenyl)acetonitrile as amine precursor. ketimine formation was done at 80 °C for 8 h. 10 equiv of allylmagnesium bromide (1 M in  $\text{Et}_2\text{O}$ ) was used and the remaining procedure is same as **General Procedure A**. Yellow oil (79.0 mg, 0.38 mmol, 58%). **FT-IR** (thin film)  $\nu_{\max}$  ( $\text{cm}^{-1}$ ): 3076, 2920, 1601, 1508, 1224, 916, 833, 815.  **$^1\text{H NMR}$**  (400 MHz,  $\text{CDCl}_3$ ):  $\delta$  7.38 (dd,  $J = 8.9, 5.3$  Hz, 2 H), 6.99 (t,  $J = 8.7$  Hz, 2 H), 5.50 (dddd,  $J = 16.7, 10.1, 8.3, 6.4$  Hz, 2 H), 5.08 – 5.02 (m, 4 H), 2.60 (ddt,  $J = 13.7, 6.3, 1.4$  Hz, 2 H), 2.38 (ddt,  $J = 13.7, 7.9, 1.0$  Hz, 2 H), 1.55 (br s, 2 H,  $\text{NH}_2$ ).  **$^{19}\text{F NMR}$**  (377 MHz,  $\text{CDCl}_3$ ):  $\delta$  -117.4 (d,  $J = 6.1$  Hz).  **$^{13}\text{C NMR}$**  (101 MHz,  $\text{CDCl}_3$ ):  $\delta$  161.4 (d,  $J_{\text{C-F}} = 245.6$  Hz), 142.4 (d,  $J_{\text{C-F}} = 3.2$  Hz), 133.7, 127.6 (d,  $J_{\text{C-F}} = 8.0$  Hz), 118.9, 114.8 (d,  $J_{\text{C-F}} = 20.7$  Hz), 56.7, 48.2. **HRMS** (ESI) Calcd for  $\text{C}_{13}\text{H}_{17}\text{NF}$  [(M+H) $^+$ ]: 206.1340, found: 206.1339.

### Synthesis of 2-(3,5-difluorophenyl)pent-4-en-2-amine (12)

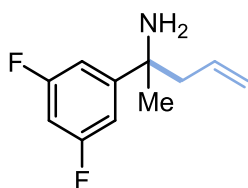

The title compound was prepared using **General Procedure A**. Brown oil (207 mg, 1.05 mmol, 82%). **FT-IR** (thin film)  $\nu_{\max}$  ( $\text{cm}^{-1}$ ): 3079, 2969, 2926, 1623, 1597, 1432, 1115, 984, 856.  **$^1\text{H NMR}$**  (400 MHz,  $\text{CDCl}_3$ ):  $\delta$  6.97 (dd,  $J = 9.4, 2.3$  Hz, 2 H), 6.62 (tt,  $J = 8.8, 2.3$  Hz, 1 H), 5.56 – 5.46 (m, 1 H), 5.08 – 5.02 (m, 2 H), 2.49 (ddt,  $J = 13.6, 6.7, 1.2$  Hz, 1 H), 2.34 (ddt,  $J = 13.7, 8.0, 1.0$  Hz, 1 H), 1.59 (br s, 2 H,  $\text{NH}_2$ ), 1.41 (s, 3 H).  **$^{19}\text{F NMR}$**  (377 MHz,  $\text{CDCl}_3$ ):  $\delta$  -110.1.  **$^{13}\text{C NMR}$**  (101 MHz,  $\text{CDCl}_3$ ):  $\delta$  163.0 (dd,  $J_{\text{C-F}} = 248.0, 12.7$  Hz), 153.3 (t,  $J_{\text{C-F}} = 7.9$  Hz), 133.5, 119.3, 108.6 (dd,  $J_{\text{C-F}} = 19.0, 7.0$  Hz), 101.6 (t,  $J_{\text{C-F}} = 25.8$  Hz), 54.8 (t,  $J_{\text{C-F}} = 2.1$  Hz), 49.5, 30.8. **HRMS** (ESI) Calcd for  $\text{C}_{11}\text{H}_{14}\text{F}_2\text{N}$   $[(\text{M}+\text{H})^+]$ : 198.1089, found: 198.1087.

### Synthesis of 2-(naphthalen-1-yl)pent-4-en-2-amine (13)

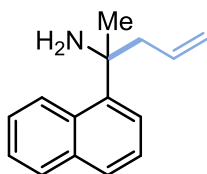

The title compound was prepared using **General Procedure A**. Yellow oil (148 mg, 0.70 mmol, 60%). **FT-IR** (thin film)  $\nu_{\max}$  ( $\text{cm}^{-1}$ ): 3047, 2925, 1638, 1509, 1177, 914, 803, 776.  **$^1\text{H NMR}$**  (400 MHz,  $\text{CDCl}_3$ ):  $\delta$  8.89 (d,  $J = 9.0$  Hz, 1 H), 7.89 (dd,  $J = 8.0, 1.8$  Hz, 1 H), 7.77 (d,  $J = 8.0$  Hz, 1 H), 7.61 (dd,  $J = 7.4, 1.3$  Hz, 1 H), 7.54 – 7.40 (m, 3 H), 5.59 (ddt,  $J = 17.3, 10.2, 7.4$  Hz, 1 H), 5.12 – 5.03 (m, 2 H), 3.01 (ddt,  $J = 13.7, 7.1, 1.2$  Hz, 1 H), 2.84 (ddt,  $J = 13.8, 7.6, 1.2$  Hz, 1 H), 1.77 (s, 5 H,  $\text{CH}_3, \text{NH}_2$ ).  **$^{13}\text{C NMR}$**  (101 MHz,  $\text{CDCl}_3$ ):  $\delta$  143.4, 135.1, 134.7, 131.3, 129.5, 128.4, 127.4, 125.1, 125.0, 124.9, 124.1, 118.4, 56.2, 48.2, 31.4. **HRMS** (ESI) Calcd for  $\text{C}_{15}\text{H}_{18}\text{N}$   $[(\text{M}+\text{H})^+]$ : 212.1434, found: 212.1437.

### Synthesis of 2-(naphthalen-2-yl)pent-4-en-2-amine (14)

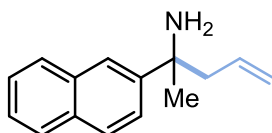

The title compound was prepared using **General Procedure A**. Pale yellow oil (180 mg, 0.73 mmol, 62%). **FT-IR** (thin film)  $\nu_{\max}$  ( $\text{cm}^{-1}$ ): 3364, 3057, 2924, 2856, 1638, 1600, 916, 818, 748.  **$^1\text{H NMR}$**  (400 MHz,  $\text{CDCl}_3$ ):  $\delta$  7.91 (s, 1 H), 7.85 – 7.81 (m, 3 H), 7.60 (dd,  $J = 8.7, 2.0$  Hz, 1 H), 7.50 – 7.43 (m, 2 H),

5.57 (ddt,  $J = 17.1, 9.8, 7.2$  Hz, 1 H), 5.12 – 5.03 (m, 2 H), 2.69 (dd,  $J = 13.6, 6.6$  Hz, 1 H), 2.51 (dd,  $J = 13.6, 8.0$  Hz, 1 H), 1.66 (br s, 2 H, NH<sub>2</sub>), 1.57 (s, 3 H). <sup>13</sup>C NMR (101 MHz, CDCl<sub>3</sub>):  $\delta$  146.2, 134.4, 133.3, 132.1, 128.2, 127.9, 127.5, 126.1, 125.7, 124.4, 123.5, 118.7, 54.9, 49.6, 31.1. HRMS (ESI) Calcd for C<sub>15</sub>H<sub>18</sub>N [(M+H)<sup>+</sup>]: 212.1434, found: 212.1435.

### Synthesis of 1-allyl-2,3-dihydro-1H-inden-1-amine (15)

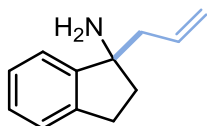

The title compound was prepared using **General Procedure A**. Yellow oil (159 mg, 0.92 mmol, 61%). FT-IR (thin film)  $\nu_{\max}$  (cm<sup>-1</sup>): 3354, 3071, 2980, 2930, 1638, 1457, 1157, 998, 915, 761. <sup>1</sup>H NMR (400 MHz, CDCl<sub>3</sub>):  $\delta$  7.27 – 7.20 (m, 4 H), 5.78 (ddt,  $J = 17.4, 10.2, 7.4$  Hz, 1 H), 5.17 – 5.10 (m, 2 H), 2.97 – 2.80 (m, 2 H), 2.49 – 2.37 (m, 2 H), 2.28 (ddd,  $J = 12.9, 7.9, 4.0$  Hz, 1 H), 2.03 (br s, 2 H, NH<sub>2</sub>), 1.93 (dt,  $J = 12.8, 8.3$  Hz, 1 H). <sup>13</sup>C NMR (101 MHz, CDCl<sub>3</sub>):  $\delta$  149.4, 142.8, 134.2, 127.5, 126.6, 125.0, 122.8, 118.8, 64.1, 45.6, 40.8, 29.6. HRMS (ESI) Calcd for C<sub>12</sub>H<sub>16</sub>N [(M+H)<sup>+</sup>]: 174.1277, found: 174.1277.

### Synthesis of 4-methylnon-1-en-4-amine (16)

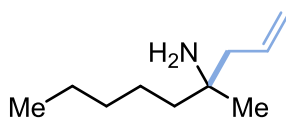

The title compound was prepared using **General Procedure B**. Yellow oil (270 mg, 1.41 mmol, 81%). FT-IR (thin film)  $\nu_{\max}$  (cm<sup>-1</sup>): 3017, 2930, 2874, 1617, 1518, 1298, 994, 921. <sup>1</sup>H NMR (400 MHz, CDCl<sub>3</sub>):  $\delta$  5.83 (ddt,  $J = 16.8, 10.3, 7.5$  Hz, 1 H), 5.15 – 5.04 (m, 2 H), 3.02 – 2.31 (br s, 2 H, NH<sub>2</sub>), 2.15 (dt,  $J = 7.4, 1.1$  Hz, 2 H), 1.38 – 1.26 (m, 8 H), 1.09 (s, 3 H), 0.88 (t,  $J = 6.9$  Hz, 3 H). <sup>13</sup>C NMR (101 MHz, CDCl<sub>3</sub>):  $\delta$  134.3, 118.6, 52.5, 46.7, 42.2, 32.6, 27.3, 23.6, 22.8, 14.2. HRMS (ESI) Calcd for C<sub>10</sub>H<sub>22</sub>N [(M+H)<sup>+</sup>]: 156.1747, found: 156.1745.

### Synthesis of 4-propylhept-1-en-4-amine hydrochloride (17)

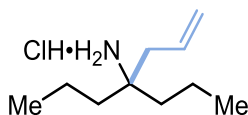

The title compound was prepared using **General Procedure B**. Yellow solid (323 mg, 1.68 mmol, 95%). FT-IR (thin film)  $\nu_{\max}$  (cm<sup>-1</sup>): 2964, 2876, 1643, 1518, 1252. <sup>1</sup>H NMR (400 MHz, CDCl<sub>3</sub>):  $\delta$  8.32 (br s, 3 H, NH<sub>3</sub><sup>+</sup>), 5.90 (ddt,  $J = 17.5, 10.2, 7.3$  Hz, 1 H), 5.24 – 5.19 (m, 2 H), 2.45 (d,  $J = 7.3$  Hz, 2 H), 1.66 – 1.62 (m, 4 H), 1.49 – 1.43 (m, 4 H), 0.93 (t,  $J = 7.2$  Hz, 6 H). <sup>13</sup>C NMR (101 MHz, CDCl<sub>3</sub>):  $\delta$  131.1,

120.7, 59.8, 41.1, 38.7, 16.6, 14.5. **HRMS** (ESI) Calcd for  $C_{10}H_{22}N$   $[(M-Cl)^+]$ : 156.1747, found: 156.1746.

### Synthesis of 1-(3,5-dimethoxyphenyl)cyclobutan-1-amine (18)

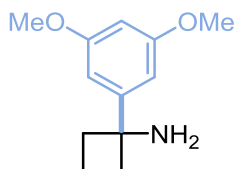

The title compound was prepared using **General Procedure C** with slight modification. The ketimine was generated in DCE from the combination of cyclobutylamine (0.10 g, 1.41 mmol) and 3,5-di-*tert*-butyl-*o*-benzoquinone **D** (0.31 g, 1.41 mmol) at 0 °C for 1 h. The solvent DCE was exchanged with toluene before the addition of (3,5-dimethoxyphenyl)lithium<sup>3</sup> which was generated from 1-bromo-3,5-dimethoxybenzene (1.83 g, 8.44 mmol, 6 equiv) and *t*BuLi (9.92 mL, 16.9 mmol, 1.7 M in pentane, 12 equiv) at -78 °C for 1 h in dry Et<sub>2</sub>O (0.1 M) under argon atmosphere. The remaining procedure is same as **General Procedure C**. Yellow oil (80.0 mg, 0.39 mmol, 27% yield). **FT-IR** (thin film)  $\nu_{max}$  (cm<sup>-1</sup>): 2981, 1596, 1252, 1204, 1154, 840. **<sup>1</sup>H NMR** (500 MHz, CDCl<sub>3</sub>):  $\delta$  6.56 (d,  $J$  = 2.3 Hz, 2 H), 6.35 (t,  $J$  = 2.3 Hz, 1 H), 3.80 (s, 6 H), 3.40 – 3.02 (br s, 2 H, NH<sub>2</sub>), 2.56 – 2.50 (m, 2 H), 2.26 – 2.08 (m, 3 H), 1.80 – 1.74 (m, 1 H). **<sup>13</sup>C NMR** (126 MHz, CDCl<sub>3</sub>):  $\delta$  161.1, 151.1, 103.5, 98.8, 59.6, 55.5, 36.0, 14.4. **HRMS** (ESI) Calcd for  $C_{12}H_{18}NO_2$   $[(M+H)^+]$ : 208.1332, found: 208.1334.

### Synthesis of 1-allylcyclopentan-1-amine hydrochloride (19)

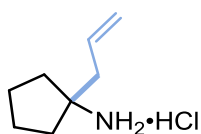

The title compound was prepared using **General Procedure B**. Yellow oil (110 mg, 0.68 mmol, 58%). **FT-IR** (thin film)  $\nu_{max}$  (cm<sup>-1</sup>): 3393, 2958, 2874, 1609, 1519, 1186, 994, 923. **<sup>1</sup>H NMR** (400 MHz, CDCl<sub>3</sub>):  $\delta$  8.31 (br s, 3 H, NH<sub>3</sub><sup>+</sup>), 5.93 – 5.85 (m, 1 H), 5.25 (dd,  $J$  = 13.4, 9.3 Hz, 2 H), 2.55 (d,  $J$  = 7.0 Hz, 2 H), 2.07 – 1.86 (m, 4 H), 1.85 – 1.73 (m, 2 H), 1.72 – 1.53 (m, 2 H). **<sup>13</sup>C NMR** (101 MHz, CDCl<sub>3</sub>):  $\delta$  131.5, 121.2, 64.8, 42.6, 36.3, 24.1. **HRMS** (ESI) Calcd for  $C_8H_{16}N$   $[(M-Cl)^+]$ : 126.1277, found: 126.1277.

### Synthesis of 1-allylcyclohexan-1-amine hydrochloride (20)

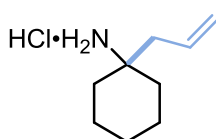

The title compound was prepared using **General Procedure B**. Pale yellow solid (76.5 mg, 0.44 mmol, 78%). **FT-IR** (thin film)  $\nu_{\max}$  ( $\text{cm}^{-1}$ ): 3031, 2925, 2861, 1616, 1516, 1197, 999.  **$^1\text{H}$  NMR** (500 MHz,  $\text{CDCl}_3$ ):  $\delta$  8.22 (br s, 3 H,  $\text{NH}_3^+$ ), 5.97 – 5.90 (m, 1 H), 5.27 – 5.24 (m, 2 H), 2.54 (d,  $J = 7.1$  Hz, 2 H), 1.90 – 1.66 (m, 6 H), 1.58 – 1.34 (m, 4 H).  **$^{13}\text{C}$  NMR** (126 MHz,  $\text{CDCl}_3$ ):  $\delta$  130.8, 121.4, 57.5, 41.4, 33.8, 24.9, 21.3. **HRMS** (ESI) Calcd for  $\text{C}_9\text{H}_{18}\text{N}$  [(M-Cl) $^+$ ]: 140.1434, found: 140.1434.

### Synthesis of 1-benzylcyclohexan-1-amine (21)

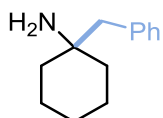

The title compound was prepared using **General Procedure A**. 10 equiv of  $\text{BnMgCl}$  (2 M in THF) was used instead of allylmagnesium bromide for the addition. Pale yellow solid (64.0 mg, 0.34 mmol, 67%). **FT-IR** (thin film)  $\nu_{\max}$  ( $\text{cm}^{-1}$ ): 3428, 2980, 2934, 2859, 1574, 1487, 1463, 1148, 764, 704.  **$^1\text{H}$  NMR** (500 MHz,  $\text{CD}_3\text{OD}$ ):  $\delta$  7.40 – 7.36 (m, 2 H), 7.34 – 7.30 (m, 1 H), 7.28 – 7.25 (m, 2 H), 3.00 (s, 2 H), 1.79 – 1.63 (m, 8 H), 1.59 – 1.45 (m, 2 H).  **$^{13}\text{C}$  NMR** (126 MHz,  $\text{CD}_3\text{OD}$ ):  $\delta$  135.6, 131.8, 129.8, 128.6, 57.5, 43.6, 35.0, 25.9, 22.3. **HRMS** (ESI) Calcd for  $\text{C}_{13}\text{H}_{20}\text{N}$  [(M+H) $^+$ ]: 190.1590, found: 190.1592.

### Synthesis of *N*-(1-phenylcyclohexyl)benzamide (22)

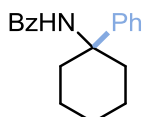

The title compound was prepared using **General Procedure C**. Commercial Phenyl lithium was used as arylating agent. The free amine was protected as benzoyl derivative using benzoyl chloride (5 equiv) with aqueous  $\text{NaOH}$  (1 M) (5 equiv). White solid (60.0 mg, 0.23 mmol, 68%). **FT-IR** (thin film)  $\nu_{\max}$  ( $\text{cm}^{-1}$ ): 3416, 2980, 1621, 1462, 1383, 1252, 1073, 954.  **$^1\text{H}$  NMR** (500 MHz,  $\text{CDCl}_3$ ):  $\delta$  7.79 (d,  $J = 7.3$  Hz, 2 H), 7.52 – 7.49 (m, 1 H), 7.47 – 7.43 (m, 4 H), 7.33 (t,  $J = 7.8$  Hz, 2 H), 7.22 (t,  $J = 7.3$  Hz, 1 H), 6.29 (s, 1 H), 2.56 – 2.50 (m, 2 H), 1.94 – 1.88 (m, 2 H), 1.78 – 1.71 (m, 3 H), 1.68 – 1.58 (m, 2 H), 1.42 – 1.32 (m, 1 H).  **$^{13}\text{C}$  NMR** (126 MHz,  $\text{CDCl}_3$ ):  $\delta$  166.3, 146.7, 135.8, 131.5, 128.8, 128.5, 126.9, 126.7, 125.2, 58.6, 36.4, 25.6, 22.6. **HRMS** (ESI) Calcd for  $\text{C}_{19}\text{H}_{22}\text{NO}$  [(M+H) $^+$ ]: 280.1696, found: 280.1695.

### Synthesis of 4-(*tert*-butyl)-1-phenylcyclohexan-1-amine (23)

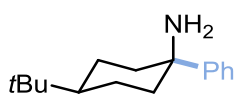

**23** (dr=4.26:1)  
(trans:cis)

The title compounds (**23** and **23'**) were prepared using **General Procedure C**. Commercial Phenyl lithium was used as arylating agent. dr=4.26:1 (determined using crude  $^1\text{H}$  NMR). White solid (756 mg, 3.27 mmol, 51%). **FT-IR** (thin film)  $\nu_{\text{max}}$  ( $\text{cm}^{-1}$ ): 2968, 2867, 1600, 1445, 1239, 757, 698.  **$^1\text{H}$  NMR** (400 MHz,  $\text{CDCl}_3$ ):  $\delta$  7.59 – 7.52 (m, 2 H), 7.40 – 7.30 (m, 2 H), 7.28 – 7.18 (m, 1 H), 1.89 – 1.68 (m, 8 H), 1.51 – 1.39 (m, 2 H), 1.08 (tt,  $J = 12.2, 3.2$  Hz, 1 H), 0.93 (s, 9 H).  **$^{13}\text{C}$  NMR** (101 MHz,  $\text{CDCl}_3$ ):  $\delta$ : 150.9, 128.2, 126.3, 124.9, 53.3, 47.8, 39.7, 32.5, 27.7, 23.0. **HRMS** (ESI) Calcd for  $\text{C}_{16}\text{H}_{26}\text{N}$  [(M+H) $^+$ ]: 232.2060, found: 232.2063.

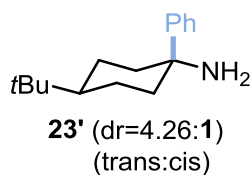

Yellow oil (180 mg, 0.78 mmol, 12%). **FT-IR** (thin film)  $\nu_{\text{max}}$  ( $\text{cm}^{-1}$ ): 2939, 2864, 1601, 1496, 1206, 768, 699.  **$^1\text{H}$  NMR** (400 MHz,  $\text{CDCl}_3$ ):  $\delta$  7.50 – 7.42 (m, 2 H), 7.34 (dd,  $J = 8.5, 7.0$  Hz, 2 H), 7.25 – 7.17 (m, 1 H), 2.57 – 2.44 (m, 2 H), 2.15 (br s, 2 H,  $\text{NH}_2$ ), 1.68 – 1.54 (m, 4 H), 1.11 (tt,  $J = 11.9, 3.1$  Hz, 1 H), 1.04 – 0.90 (m, 2 H), 0.74 (s, 9 H).  **$^{13}\text{C}$  NMR** (101 MHz,  $\text{CDCl}_3$ ):  $\delta$  145.7, 128.7, 126.5, 126.2, 54.5, 48.1, 39.5, 32.3, 27.6, 24.5. **HRMS** (ESI) Calcd for  $\text{C}_{16}\text{H}_{26}\text{N}$  [(M+H) $^+$ ]: 232.2060, found: 232.2061.

#### Synthesis of 1-allylcycloheptan-1-amine hydrochloride (**24**)

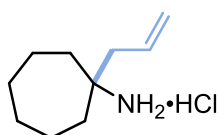

The title compound was prepared using **General Procedure B**. Off-white solid (356 mg, 1.88 mmol, 61%). **FT-IR** (thin film)  $\nu_{\text{max}}$  ( $\text{cm}^{-1}$ ): 2981, 2929, 1614, 1514, 1252, 955.  **$^1\text{H}$  NMR** (400 MHz,  $\text{CDCl}_3$ ):  $\delta$  8.30 (br s, 3 H,  $\text{NH}_3^+$ ), 5.96 (ddt,  $J = 16.4, 10.3, 7.4$  Hz, 1 H), 5.28 – 5.23 (m, 2 H), 2.49 (d,  $J = 7.4$  Hz, 2 H), 2.00 – 1.89 (m, 2 H), 1.89 – 1.76 (m, 4 H), 1.71 – 1.59 (m, 2 H), 1.56 – 1.39 (m, 4 H).  **$^{13}\text{C}$  NMR** (101 MHz,  $\text{CDCl}_3$ ):  $\delta$  131.2, 121.4, 61.0, 44.1, 37.7, 29.9, 22.3. **HRMS** (ESI) Calcd for  $\text{C}_{10}\text{H}_{20}\text{N}$  [(M-Cl) $^+$ ]: 154.1590, found: 154.1590.

#### Synthesis of 1-allylcyclooctan-1-amine hydrochloride (**25**)

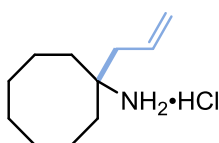

The title compound was prepared using **General Procedure A**. The free amine was protected as HCl salt using 4 M HCl in dioxane. The cleavage of phenol unit was performed by using 2 equiv of  $\text{I}_2$  and 5

equiv NaOH (1 M). Pale yellow solid (993 mg, 4.87 mmol, 62%). **FT-IR** (thin film)  $\nu_{\max}$  ( $\text{cm}^{-1}$ ): 2980, 2916, 1641, 1517, 1253, 920, 731.  **$^1\text{H}$  NMR** (400 MHz,  $\text{CDCl}_3$ ):  $\delta$  8.25 (br s, 3 H,  $\text{NH}_3^+$ ), 6.07 – 5.97 (m, 1 H), 5.29 – 5.22 (m, 2 H), 2.47 (d,  $J = 7.4$  Hz, 2 H), 2.08 – 2.02 (m, 2 H), 1.83 – 1.62 (m, 6 H), 1.61 – 1.49 (m, 4 H), 1.48 – 1.35 (m, 2 H).  **$^{13}\text{C}$  NMR** (101 MHz,  $\text{CDCl}_3$ ):  $\delta$  131.2, 121.1, 60.8, 43.0, 33.2, 28.1, 24.9, 22.1. **HRMS** (ESI) Calcd for  $\text{C}_{11}\text{H}_{22}\text{N}$  [(M-Cl) $^+$ ]: 168.1747, found: 168.1745.

### Synthesis of 3-allyltetrahydrofuran-3-amine (26)

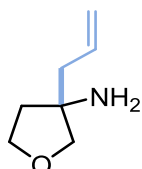

The title compound was prepared using **General Procedure A**. The cleavage of phenol unit was performed by using 2 equiv of  $\text{I}_2$  and 5 equiv NaOH (1 M). Yellow oil (141 mg, 1.11 mmol, 88%). **FT-IR** (thin film)  $\nu_{\max}$  ( $\text{cm}^{-1}$ ): 3349, 2928, 2866, 1640, 1440, 1220, 1054, 913.  **$^1\text{H}$  NMR** (400 MHz,  $\text{CDCl}_3$ ):  $\delta$  5.80 (ddt,  $J = 19.9, 9.2, 7.4$  Hz, 1 H), 5.15 – 5.11 (m, 2 H), 3.97 (dd,  $J = 16.0, 8.0$  Hz, 1 H), 3.85 (td,  $J = 8.7, 4.7$  Hz, 1 H), 3.56 (d,  $J = 8.7$  Hz, 1 H), 3.48 (d,  $J = 8.7$  Hz, 1 H), 2.29 (d,  $J = 7.4$  Hz, 2 H), 1.91 (dt,  $J = 12.4, 8.3$  Hz, 1 H), 1.82 (br s, 2 H,  $\text{NH}_2$ ), 1.72 (ddd,  $J = 12.5, 7.6, 4.7$  Hz, 1 H).  **$^{13}\text{C}$  NMR** (101 MHz,  $\text{CDCl}_3$ ):  $\delta$  133.8, 119.1, 79.2, 67.5, 60.5, 44.0, 40.0. **HRMS** (ESI) Calcd for  $\text{C}_7\text{H}_{14}\text{NO}$  [(M+H) $^+$ ]: 128.1070, found: 128.1069.

### Synthesis of 4-allyltetrahydro-2H-pyran-4-amine hydrochloride (27)

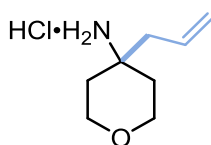

The title compound was prepared using **General Procedure B**. Off-white powder (139 mg, 0.78 mmol, 79%). **FT-IR** (thin film)  $\nu_{\max}$  ( $\text{cm}^{-1}$ ): 3390, 2980, 1640, 1524, 1237, 1157, 936, 839.  **$^1\text{H}$  NMR** (400 MHz,  $\text{CDCl}_3$ ):  $\delta$  8.56 (br s, 3 H,  $\text{NH}_3^+$ ), 5.94 (ddt,  $J = 17.5, 10.3, 7.4$  Hz, 1 H), 5.44 – 5.14 (m, 2 H), 3.96 (ddd,  $J = 11.9, 8.0, 3.6$  Hz, 2 H), 3.70 (ddd,  $J = 12.4, 6.2, 4.1$  Hz, 2 H), 2.61 (d,  $J = 7.4$  Hz, 2 H), 2.00 – 1.81 (m, 4 H).  **$^{13}\text{C}$  NMR** (101 MHz,  $\text{CDCl}_3$ ):  $\delta$  129.8, 122.2, 62.8, 55.0, 41.8, 33.8. **HRMS** (ESI) Calcd for  $\text{C}_8\text{H}_{16}\text{NO}$  [(M-Cl) $^+$ ]: 142.1226, found: 142.1225.



### Synthesis of 4-allyltetrahydro-2H-thiopyran-4-amine (28)

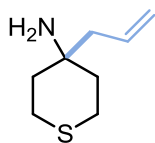

The title compound was prepared using **General Procedure B**. The HCl salt of compound **28** was basified with 1 M NaOH (1 mL), extracted with CHCl<sub>3</sub> (3 x 20 mL) and dried by Na<sub>2</sub>SO<sub>4</sub>. After removal of solvents gave the desired 4-allyltetrahydro-2H-thiopyran-4-amine **28** as yellow oil (99.0 mg, 0.63 mmol, 67%). **FT-IR** (thin film)  $\nu_{\max}$  (cm<sup>-1</sup>): 3336, 3073, 2925, 1638, 1437, 1273, 998, 916. **<sup>1</sup>H NMR** (400 MHz, CDCl<sub>3</sub>):  $\delta$  5.81 (ddt,  $J$  = 16.9, 10.2, 7.5 Hz, 1 H), 5.18 – 5.05 (m, 2 H), 2.89 – 2.77 (m, 2 H), 2.55 – 2.41 (m, 2 H), 2.13 (dt,  $J$  = 7.5, 1.1 Hz, 2 H), 2.01 – 1.90 (br s, 2 H, NH<sub>2</sub>), 1.81 – 1.67 (m, 4 H). **<sup>13</sup>C NMR** (101 MHz, CDCl<sub>3</sub>):  $\delta$  133.0, 119.1, 49.7, 48.0, 39.2, 24.2. **HRMS** (ESI) Calcd for C<sub>8</sub>H<sub>16</sub>NS [(M+H)<sup>+</sup>]: 158.0998, found: 158.0999.

### Synthesis of 2-(4-allyl-4-aminopiperidin-1-yl)-4,6-di-*tert*-butylphenol (29)

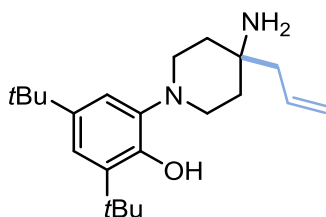

The title compound was prepared using **General Procedure A** starting from *tert*-butyl 4-aminopiperidine-1-carboxylate. The Boc protection was cleaved during oxidation and the free amine 4-allylpiperidin-4-amine was reactive enough to undergo a self-condensation with the formed *o*-quinone, which ends up with the product **29**<sup>5</sup> as a yellow oil (76.0 mg, 0.22 mmol, 44%). **FT-IR** (thin film)  $\nu_{\max}$  (cm<sup>-1</sup>): 3389, 2958, 1640, 1480, 1248, 967. **<sup>1</sup>H NMR** (400 MHz, CD<sub>3</sub>OD):  $\delta$  7.01 (d,  $J$  = 2.3 Hz, 1 H), 6.93 (d,  $J$  = 2.3 Hz, 1 H), 5.96 (ddt,  $J$  = 17.5, 10.3, 7.3 Hz, 1 H), 5.22 – 5.15 (m, 2 H), 3.35 – 3.29 (m, 2 H), 3.16 (ddd,  $J$  = 12.9, 6.9, 4.0 Hz, 2 H), 2.50 (d,  $J$  = 7.3 Hz, 2 H), 2.01 – 1.93 (m, 2 H), 1.83 (ddd,  $J$  = 14.1, 9.0, 3.9 Hz, 2 H), 1.39 (s, 9 H), 1.28 (s, 9 H). **<sup>13</sup>C NMR** (101 MHz, CD<sub>3</sub>OD):  $\delta$  148.9, 142.7, 137.2, 134.1, 132.5, 120.6, 119.7, 119.5, 54.6, 43.3, 41.6, 35.8, 35.1, 32.9, 32.1, 30.2. **HRMS** (ESI) Calcd for C<sub>22</sub>H<sub>37</sub>N<sub>2</sub>O [(M+H)<sup>+</sup>]: 345.2900, found: 345.2898.

### Synthesis of *tert*-butyl 4-allyl-4-aminopiperidine-1-carboxylate hydrochloride (**30**)

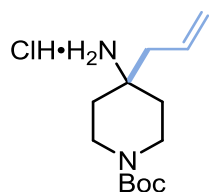

The title compound was prepared using **General Procedure B**. The cleavage of phenol unit was performed by adding 1.2 equiv of pyrrolidine along with I<sub>2</sub> (1.2 equiv) and NaOH (1 M) (5 equiv) to suppress the self-condensation of 4-allylpiperidin-4-amine with the liberated *o*-quinone. The HCl salt of compound **30** was selectively Boc protected on the secondary amine using Boc<sub>2</sub>O (2 equiv) and K<sub>2</sub>CO<sub>3</sub> (3 equiv) in THF:H<sub>2</sub>O (2:1 v:v)(0.4 M) at 25 °C for 24 h. The crude product was purified by column chromatography on silica gel using pentane/EtOAc (80:20 v:v) and followed by EtOAc:MeOH:Et<sub>3</sub>N (70:20:10 v:v) as solvent system to afford the Boc protected free amine **30** (82.0 mg, 0.38 mmol, 68%) as a brown oil and the free amine was protected as HCl salt using 4 M HCl (excess) in dioxane to give a yellow solid. **FT-IR** (thin film)  $\nu_{\max}$  (cm<sup>-1</sup>): 3398, 2928, 1693, 1526 1479, 1249, 1164. **<sup>1</sup>H NMR** (500 MHz, CDCl<sub>3</sub>):  $\delta$  8.53 (br s, 3 H, NH<sub>3</sub><sup>+</sup>), 5.97 – 5.87 (m, 1 H), 5.34 – 5.24 (m, 2 H), 3.70 – 3.49 (m, 4 H), 2.57 (d, *J* = 7.0 Hz, 2 H), 1.95 – 1.71 (m, 4 H), 1.45 (s, 9 H). **<sup>13</sup>C NMR** (126 MHz, CDCl<sub>3</sub>):  $\delta$  154.5, 129.7, 122.3, 80.3, 56.0, 41.6, 39.0, 33.2, 28.5. **HRMS** (ESI) Calcd for C<sub>13</sub>H<sub>25</sub>N<sub>2</sub>O<sub>2</sub> [(M-Cl)<sup>+</sup>]: 241.1911, found: 241.1913.

### Synthesis of 2-(pyridin-4-yl)pent-4-en-2-amine (**31**)

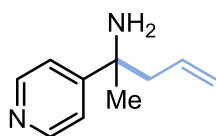

The title compound was prepared using **General Procedure B**. The HCl salt of compound **31** was basified with 1 M NaOH (1 mL), extracted with CHCl<sub>3</sub> (3 x 20 mL) and dried with Na<sub>2</sub>SO<sub>4</sub>. After removal of solvents gave the desired 2-(pyridin-4-yl)pent-4-en-2-amine **31** as a pale-yellow oil (100 mg, 0.62 mmol, 75%). **FT-IR** (thin film)  $\nu_{\max}$  (cm<sup>-1</sup>): 3349, 3077, 2921, 2850, 1640, 1439, 1279, 1000, 922, 825. **<sup>1</sup>H NMR** (400 MHz, CDCl<sub>3</sub>):  $\delta$  8.55 (d, *J* = 6.3 Hz, 2 H), 7.37 (d, *J* = 6.3 Hz, 2 H), 5.57 – 5.46 (m, 1 H), 5.10 – 5.05 (m, 2 H), 2.54 (ddt, *J* = 13.6, 6.7, 1.3 Hz, 1 H), 2.39 (ddt, *J* = 13.6, 8.0, 1.1 Hz, 1 H), 1.91 (br s, 2 H, NH<sub>2</sub>), 1.45 (s, 3 H). **<sup>13</sup>C NMR** (101 MHz, CDCl<sub>3</sub>):  $\delta$  157.7, 149.8, 133.3, 120.8, 119.6, 54.6, 49.2, 30.5. **HRMS** (ESI) Calcd for C<sub>10</sub>H<sub>15</sub>N<sub>2</sub> [(M+H)<sup>+</sup>]: 163.1230, found: 163.1230.

### Synthesis of 2-(4-methoxyphenyl)propan-2-amine (32)

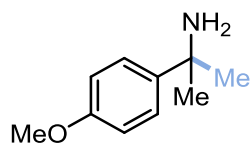

The title compound was prepared using **General Procedure C**. Commercial methylolithium solution (1.6 M in diethyl ether) was used. Yellow oil (94.0 mg, 0.57 mmol, 86%). **FT-IR** (thin film)  $\nu_{\max}$  ( $\text{cm}^{-1}$ ): 3353, 2962, 2836, 1610, 1512, 1245, 1180, 1032, 830.  **$^1\text{H NMR}$**  (400 MHz,  $\text{CDCl}_3$ ):  $\delta$  7.42 (d,  $J = 8.9$  Hz, 2 H), 6.85 (d,  $J = 8.9$  Hz, 2 H), 3.78 (s, 3 H), 1.96 (br s, 2 H,  $\text{NH}_2$ ), 1.48 (s, 6 H).  **$^{13}\text{C NMR}$**  (101 MHz,  $\text{CDCl}_3$ ):  $\delta$  158.0, 142.3, 125.9, 113.5, 55.2, 52.1, 32.8. **HRMS** (ESI) Calcd for  $\text{C}_{10}\text{H}_{13}\text{O}$  [ $\text{M}-\text{NH}_2$ ]: 149.0961, found: 149.0960.

### Synthesis of 2-(4-methoxyphenyl)hexan-2-amine (33)

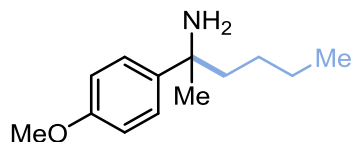

The title compound was prepared using **General Procedure C**. Commercial *n*-butyllithium solution (2.5 M in hexanes) was used. Yellow oil (107 mg, 0.52 mmol, 78%). **FT-IR** (thin film)  $\nu_{\max}$  ( $\text{cm}^{-1}$ ): 3396, 2956, 2930, 2860, 1611, 1510, 1246, 1180, 1135, 829.  **$^1\text{H NMR}$**  (400 MHz,  $\text{CDCl}_3$ ):  $\delta$  7.35 (d,  $J = 8.9$  Hz, 2 H), 6.85 (d,  $J = 8.9$  Hz, 2 H), 3.79 (s, 3 H), 1.89 (br s, 2 H,  $\text{NH}_2$ ), 1.77 – 1.63 (m, 2 H), 1.44 (s, 3 H), 1.29 – 1.02 (m, 4 H), 0.83 (t,  $J = 7.3$  Hz, 3 H).  **$^{13}\text{C NMR}$**  (101 MHz,  $\text{CDCl}_3$ ):  $\delta$  157.8, 141.0, 126.4, 113.4, 55.3, 54.7, 45.1, 31.1, 26.7, 23.2, 14.1. **HRMS** (ESI) Calcd for  $\text{C}_{13}\text{H}_{19}\text{O}$  [ $\text{M}-\text{NH}_2$ ]: 191.1430, found: 191.1431.

### Synthesis of 2-(4-methoxyphenyl)-3-methylpentan-2-amine (34)

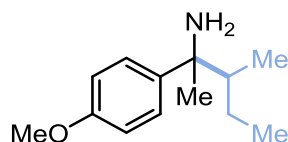

The title compound was prepared using **General Procedure C**. Commercial *sec*-butyllithium solution (1.4 M in cyclohexane) was used. dr = 1:1, yellow oil (99.0 mg, 0.48 mmol, 72%). **FT-IR** (thin film)  $\nu_{\max}$  ( $\text{cm}^{-1}$ ): 3390, 2965, 2931, 1610, 1510, 1247, 1180, 1136, 831.  **$^1\text{H NMR}$**  (400 MHz,  $\text{CDCl}_3$ ):  $\delta$  7.35 (d,  $J = 8.9$  Hz, 4 H), 6.85 (d,  $J = 8.9$  Hz, 4 H), 3.79 (s, 6 H), 1.66 – 1.56 (m, 2 H), 1.55 – 1.41 (m, 6 H), 1.40 (s, 3 H), 1.37 (s, 3 H), 0.93 – 0.80 (m, 11 H), 0.78 (d,  $J = 6.7$  Hz, 3 H).  **$^{13}\text{C NMR}$**  (101 MHz,  $\text{CDCl}_3$ ):  $\delta$  157.8 (2

x C), 141.8, 141.6, 126.8, 126.7, 113.3, 113.2, 57.6, 57.4, 55.3 (2 x OCH<sub>3</sub>), 46.4, 46.3, 28.1, 27.5, 24.3, 24.2, 13.7, 13.6, 13.0 (2 x CH<sub>3</sub>). **HRMS** (ESI) Calcd for C<sub>13</sub>H<sub>19</sub>O[M-NH<sub>2</sub>]: 191.1430, found: 191.1430.

### Synthesis of 2-(4-methoxyphenyl)-3,3-dimethylbutan-2-amine hydrochloride (35)

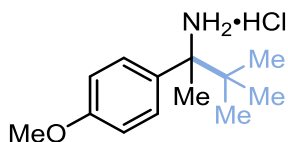

The title compound was prepared using **General Procedure C**. Commercial *tert*-butyllithium solution (1.7 M in pentane) was used. The free amine was protected as HCl salt using 4 M HCl (excess) in dioxane. Yellow solid (96.0 mg, 0.46 mmol, 70%). **FT-IR** (thin film)  $\nu_{\max}$  (cm<sup>-1</sup>): 2980, 2889, 1610, 1515, 1256, 831, 729. **<sup>1</sup>H NMR** (400 MHz, CDCl<sub>3</sub>):  $\delta$  7.37 (d, *J* = 8.9 Hz, 2 H), 6.78 (d, *J* = 8.9 Hz, 2 H), 3.74 (s, 3 H), 1.80 (s, 3 H), 1.01 (s, 9 H). **<sup>13</sup>C NMR** (101 MHz, CDCl<sub>3</sub>):  $\delta$  158.7, 131.0, 128.5, 113.0, 65.4, 55.2, 37.4, 26.1, 21.4. **HRMS** (ESI) Calcd for C<sub>13</sub>H<sub>22</sub>NO[(M-Cl)<sup>+</sup>]: 208.1696, found: 208.1697.

### Synthesis of 2-(4-methoxyphenyl)but-3-en-2-amine hydrochloride (36)

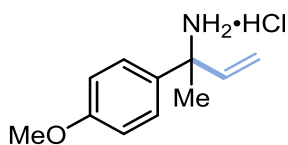

The title compound was prepared using **General Procedure C**. Vinyl lithium was generated using the known literature method<sup>6</sup> in brief, in a Schlenk tube under an argon atmosphere, *n*-butyllithium (3.17, 7.94 mmol, 2.5 M in hexanes) was added dropwise to the neat tetravinyl stannane (0.72 mL, 3.97 mmol) over the course of 5 min at 25 °C. A white precipitate has formed during the addition of *n*-butyllithium. After letting it settle, the supernatant solution was collected through syringe and added to the ketimine/hemiaminal and TMEDA mixture at 0 °C. The reaction was gradually warmed to 25 °C and continued the stirring for 24 h. The remaining procedure is same as **General Procedure C**. 10 equiv of NaOH (1.0 M) was used during oxidation. The free amine was protected as HCl salt using 4 M HCl (0.5 mL) in dioxane. Yellow solid (107 mg, 0.50 mmol, 76%). **FT-IR** (thin film)  $\nu_{\max}$  (cm<sup>-1</sup>): 3387, 2980, 1609, 1514, 1255, 1188, 1029, 830. **<sup>1</sup>H NMR** (400 MHz, CDCl<sub>3</sub>):  $\delta$  9.01 (br s, 3 H, NH<sub>3</sub><sup>+</sup>), 7.45 (d, *J* = 8.9 Hz, 2 H), 6.84 (d, *J* = 8.9 Hz, 2 H), 6.02 (dd, *J* = 17.4, 10.9 Hz, 1 H), 5.40 – 5.23 (m, 2 H), 3.77 (s, 3 H), 1.82 (s, 3 H). **<sup>13</sup>C NMR** (101 MHz, CDCl<sub>3</sub>):  $\delta$  159.5, 139.0, 131.3, 127.8, 116.2, 114.0, 60.1, 55.3, 25.3. **HRMS** (ESI) Calcd for C<sub>11</sub>H<sub>13</sub>O [M-NH<sub>3</sub>Cl]: 161.0961, found: 161.0961.

### Synthesis of 1-(4-methoxyphenyl)-1-phenylethan-1-amine (37)

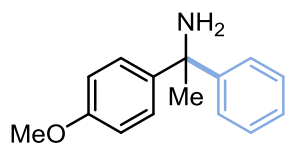

The title compound was prepared using **General Procedure C**. Commercial PhLi (1.9 M in dibutyl ether) was used. Yellow oil (123 mg, 0.54 mmol, 82%). **FT-IR** (thin film)  $\nu_{\max}$  (cm<sup>-1</sup>): 2967, 2835, 1609, 1509, 1248, 1180, 1030, 832, 701. **<sup>1</sup>H NMR** (400 MHz, CDCl<sub>3</sub>):  $\delta$  7.39 – 7.36 (m, 2 H), 7.32 – 7.27 (m, 4 H), 7.23 – 7.19 (m, 1 H), 6.83 (d,  $J$  = 8.9 Hz, 2 H), 3.79 (s, 3 H), 2.31 (br s, 2 H, NH<sub>2</sub>), 1.85 (s, 3 H). **<sup>13</sup>C NMR** (101 MHz, CDCl<sub>3</sub>):  $\delta$  158.2, 149.9, 141.9, 128.2, 127.5, 126.5, 126.2, 113.5, 58.3, 55.4, 32.0. **HRMS** (ESI) Calcd for C<sub>15</sub>H<sub>15</sub>O [M-NH<sub>2</sub>]: 211.1117, found: 211.1116.

### Synthesis of 2-(4-methoxyphenyl)-1-phenylpropan-2-amine (38)

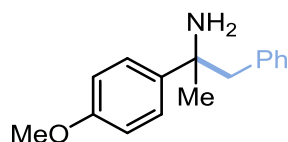

The title compound was prepared using **General Procedure A**. 10 equiv of BnMgCl (2 M in THF) was used instead of allylmagnesium bromide for the addition. Yellow oil (101 mg, 0.42 mmol, 63%). **FT-IR** (thin film)  $\nu_{\max}$  (cm<sup>-1</sup>): 3028, 2930, 2835, 1610, 1511, 1247, 1181, 1033, 831, 703. **<sup>1</sup>H NMR** (400 MHz, CDCl<sub>3</sub>):  $\delta$  7.32 (d,  $J$  = 8.9 Hz, 2 H), 7.21 – 7.17 (m, 3 H), 6.94 – 6.90 (m, 2 H), 6.86 (d,  $J$  = 8.9 Hz, 2 H), 3.81 (s, 3 H), 3.00 (d,  $J$  = 13.0 Hz, 1 H), 2.94 (d,  $J$  = 13.0 Hz, 1 H), 1.51 (br s, 2 H, NH<sub>2</sub>), 1.48 (s, 3 H). **<sup>13</sup>C NMR** (101 MHz, CDCl<sub>3</sub>):  $\delta$  158.1, 140.8, 137.8, 130.7, 127.9, 126.7, 126.4, 113.4, 55.4, 55.2, 51.9, 30.8. **HRMS** (ESI) Calcd for C<sub>16</sub>H<sub>17</sub>O [M-NH<sub>2</sub>]: 225.1274, found: 225.1273.

### Synthesis of 1-(4-butylphenyl)-1-(4-methoxyphenyl)ethan-1-amine (39)

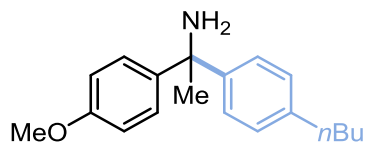

The title compound was prepared using **General Procedure C**. 1-bromo-4-butylbenzene was used for lithium-halogen exchange<sup>3</sup> in THF at -78 °C for 1 h. Yellow oil (125 mg, 0.44 mmol, 67%). **FT-IR** (thin film)  $\nu_{\max}$  (cm<sup>-1</sup>): 3023, 2956, 2929, 2857, 1609, 1510, 1249, 1181, 1034, 831. **<sup>1</sup>H NMR** (400 MHz, CDCl<sub>3</sub>):  $\delta$  7.31 – 7.25 (m, 4 H), 7.10 (d,  $J$  = 8.90 Hz, 2 H), 6.83 (d,  $J$  = 8.9 Hz, 2 H), 3.79 (s, 3 H), 2.58 (t,  $J$  = 7.8 Hz, 2 H), 2.01 (br s, 2 H, NH<sub>2</sub>), 1.82 (s, 3 H), 1.61 – 1.54 (m, 2 H), 1.38 – 1.33 (m, 2 H), 0.92 (t,  $J$  = 7.3 Hz, 3 H). **<sup>13</sup>C NMR** (101 MHz, CDCl<sub>3</sub>):  $\delta$  158.1, 147.2, 142.1, 141.0, 128.2, 127.4, 126.1, 113.5,

58.0, 55.3, 35.3, 33.7, 32.1, 22.6, 14.1. **HRMS** (ESI) Calcd for  $C_{19}H_{23}O$  [M-NH<sub>2</sub>]: 267.1743, found: 267.1743.

#### Synthesis of 4-(1-amino-1-(4-methoxyphenyl)ethyl)-*N,N*-dimethylaniline (40)

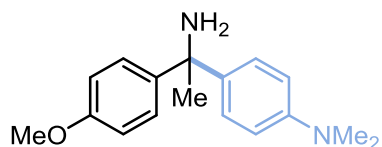

The title compound was prepared using **General Procedure C**. 4-bromo-*N,N*-dimethylaniline was used for lithium-halogen exchange<sup>3</sup> in THF at -78 °C for 1 h. 3 equiv of iodine was used as oxidant. Brown oil (95.0 mg, 0.35 mmol, 53%). **FT-IR** (thin film)  $\nu_{\max}$  (cm<sup>-1</sup>): 3310, 2929, 2910, 2863, 1609, 1509, 1245, 1178, 1032, 815. **<sup>1</sup>H NMR** (400 MHz, CD<sub>2</sub>Cl<sub>2</sub>):  $\delta$  7.30 (d,  $J$  = 8.9 Hz, 2 H), 7.21 (d,  $J$  = 8.8 Hz, 2 H), 6.81 (d,  $J$  = 8.9 Hz, 2 H), 6.66 (d,  $J$  = 8.8 Hz, 2 H), 3.77 (s, 3 H), 2.91 (s, 6 H), 1.92 (br s, 2 H, NH<sub>2</sub>), 1.77 (s, 3 H). **<sup>13</sup>C NMR** (101 MHz, CD<sub>2</sub>Cl<sub>2</sub>):  $\delta$  158.2, 149.5, 143.3, 138.7, 127.6, 127.1, 113.5, 112.5, 57.6, 55.5, 40.8, 32.5. **HRMS** (ESI) Calcd for  $C_{17}H_{20}NO$  [M-NH<sub>2</sub>]: 254.1539, found: 254.1541.

#### Synthesis of 1,1-bis(4-methoxyphenyl)ethan-1-amine (41)

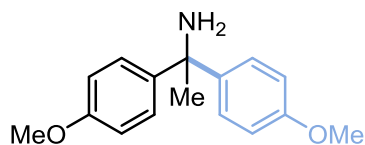

The title compound was prepared using **General Procedure C**. 1-bromo-4-methoxybenzene was used for lithium-halogen exchange<sup>3</sup> in THF at -78 °C for 1 h. 2 equiv of iodine was used as oxidant. Yellow oil (86.0 mg, 0.33 mmol, 51%). **FT-IR** (thin film)  $\nu_{\max}$  (cm<sup>-1</sup>): 3035, 2934, 2836, 1609, 1510, 1246, 1181, 1029, 1008, 830, 758. **<sup>1</sup>H NMR** (400 MHz, CDCl<sub>3</sub>):  $\delta$  7.29 (d,  $J$  = 8.9 Hz, 4 H), 6.83 (d,  $J$  = 8.9 Hz, 4 H), 3.79 (s, 6 H), 2.73 (br s, 2 H, NH<sub>2</sub>), 1.83 (s, 3 H). **<sup>13</sup>C NMR** (101 MHz, CDCl<sub>3</sub>):  $\delta$  158.1, 141.7, 127.4, 113.5, 58.0, 55.3, 32.0. **HRMS** (ESI) Calcd for  $C_{16}H_{17}O_2$  [M-NH<sub>2</sub>]: 241.1223, found: 241.1221.

#### Synthesis of 1-(3,5-dimethoxyphenyl)-1-(4-methoxyphenyl)ethan-1-amine (42)

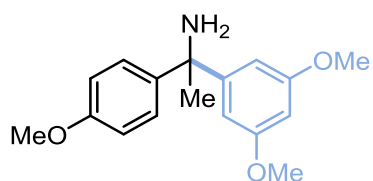

The title compound was prepared using **General Procedure C**. 1-bromo-3,5-dimethoxybenzene was used for lithium-halogen exchange<sup>3</sup> in THF at -78 °C for 1 h. Yellow oil (123 mg, 0.43 mmol, 65%). **FT-**

**IR** (thin film)  $\nu_{\max}$  ( $\text{cm}^{-1}$ ): 3315, 2935, 2836, 1595, 1456, 1247, 1181, 1034, 832.  **$^1\text{H NMR}$**  (400 MHz,  $\text{CDCl}_3$ ):  $\delta$  7.29 (d,  $J = 8.9$  Hz, 2 H), 6.82 (d,  $J = 8.9$  Hz, 2 H), 6.53 (d,  $J = 2.3$  Hz, 2 H), 6.32 (t,  $J = 2.3$  Hz, 1 H), 3.79 (s, 3 H), 3.75 (s, 6 H), 1.98 (br s, 2 H,  $\text{NH}_2$ ), 1.80 (s, 3 H).  **$^{13}\text{C NMR}$**  (101 MHz,  $\text{CDCl}_3$ ):  $\delta$  160.6, 158.1, 152.9, 141.8, 127.3, 113.5, 104.9, 97.9, 58.3, 55.4, 55.3, 32.1. **HRMS** (ESI) Calcd for  $\text{C}_{17}\text{H}_{19}\text{O}_3$  [ $\text{M}-\text{NH}_2$ ]: 271.1329, found: 271.1329.

### Synthesis of 1-(4-methoxyphenyl)-1-(4-(methylthio)phenyl)ethan-1-amine (43)

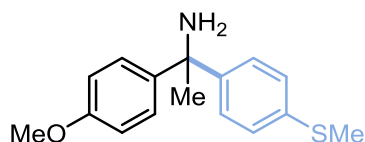

The title compound was prepared using **General Procedure C**. (4-bromophenyl)(methyl)sulfane was used for lithium-halogen exchange<sup>3</sup> in THF at  $-78$  °C for 1.5 h. 5 equiv of iodine was used as oxidant. Yellow oil (113 mg, 0.41 mmol, 63%). **FT-IR** (thin film)  $\nu_{\max}$  ( $\text{cm}^{-1}$ ): 3300, 2965, 2837, 1608, 1510, 1247, 1181, 1031, 814, 782.  **$^1\text{H NMR}$**  (400 MHz,  $\text{CDCl}_3$ ):  $\delta$  7.30 (dd,  $J = 8.7, 5.5$  Hz, 4 H), 7.19 (d,  $J = 8.9$  Hz, 2 H), 6.83 (d,  $J = 8.9$  Hz, 2 H), 3.79 (s, 3 H), 3.49 (br s, 2 H,  $\text{NH}_2$ ), 2.47 (s, 3 H), 1.85 (s, 3 H).  **$^{13}\text{C NMR}$**  (101 MHz,  $\text{CDCl}_3$ ):  $\delta$  158.3, 146.1, 140.8, 136.5, 127.4, 126.8, 126.5, 113.5, 58.4, 55.3, 31.5, 15.9. **HRMS** (ESI) Calcd for  $\text{C}_{16}\text{H}_{17}\text{OS}$  [ $\text{M}-\text{NH}_2$ ]: 257.0995, found: 257.0995.

### Synthesis of 1-(benzo[*d*][1,3]dioxol-5-yl)-1-(4-methoxyphenyl)ethan-1-amine (44)

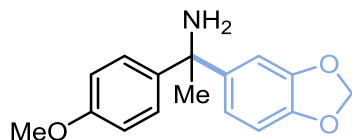

The title compound was prepared using **General Procedure C**. 5-bromobenzo[*d*][1,3]dioxole was used for lithium-halogen exchange<sup>3</sup> in THF at  $-78$  °C for 1 h. 2 equiv of iodine was used as oxidant. Yellow oil (101 mg, 0.37 mmol, 56%). **FT-IR** (thin film)  $\nu_{\max}$  ( $\text{cm}^{-1}$ ): 3356, 2980, 2890, 1609, 1485, 1237, 1180, 1035, 864, 833.  **$^1\text{H NMR}$**  (500 MHz,  $\text{CDCl}_3$ ):  $\delta$  7.29 (d,  $J = 8.9$  Hz, 2 H), 6.87 (dd,  $J = 8.1, 2.0$  Hz, 1 H), 6.84 – 6.82 (m, 3 H), 6.72 (d,  $J = 8.1$  Hz, 1 H), 5.91 (s, 2 H), 3.79 (s, 3 H), 2.02 (br s, 2 H,  $\text{NH}_2$ ), 1.80 (s, 3 H).  **$^{13}\text{C NMR}$**  (126 MHz,  $\text{CDCl}_3$ ):  $\delta$  158.2, 147.6, 146.0, 144.3, 142.0, 127.3, 119.1, 113.5, 107.7, 107.5, 101.1, 58.1, 55.4, 32.3. **HRMS** (ESI) Calcd for  $\text{C}_{16}\text{H}_{15}\text{O}_3$  [ $\text{M}-\text{NH}_2$ ]: 255.1016, found: 255.1016.

### Synthesis of 1-(4-fluorophenyl)-1-(4-methoxyphenyl)ethan-1-amine (45)

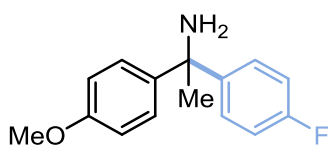

The title compound was prepared using **General Procedure C**. 1-bromo-4-fluorobenzene was used for lithium-halogen exchange<sup>4</sup> in Et<sub>2</sub>O at -78 °C for 30 min. Yellow oil (70.0 mg, 0.29 mmol, 43%). **FT-IR** (thin film)  $\nu_{\max}$  (cm<sup>-1</sup>): 3062, 2927, 2836, 1603, 1509, 1249, 1033, 833. **<sup>1</sup>H NMR** (400 MHz, CDCl<sub>3</sub>):  $\delta$  7.26 (dd,  $J$  = 8.9, 5.3 Hz, 2 H), 7.19 (d,  $J$  = 8.9 Hz, 2 H), 6.88 (t,  $J$  = 8.7 Hz, 2 H), 6.76 (d,  $J$  = 8.9 Hz, 2 H), 3.72 (s, 3 H), 1.80 (br s, 2 H, NH<sub>2</sub>), 1.74 (s, 3 H). **<sup>19</sup>F NMR** (377 MHz, CDCl<sub>3</sub>):  $\delta$  -117.2. **<sup>13</sup>C NMR** (101 MHz, CDCl<sub>3</sub>):  $\delta$  161.5 (d,  $J_{C-F}$  = 245.7 Hz), 158.2, 146.0 (d,  $J_{C-F}$  = 3.2 Hz), 142.0, 127.9 (d,  $J_{C-F}$  = 8.0 Hz), 127.3, 114.8 (d,  $J_{C-F}$  = 20.8 Hz), 113.6, 57.8, 55.4, 32.4. **HRMS** (ESI) Calcd for C<sub>15</sub>H<sub>14</sub>OF[M-NH<sub>2</sub>]: 229.1023, found: 229.1026.

### Synthesis of 1-(4-chlorophenyl)-1-(4-methoxyphenyl)ethan-1-amine (46)

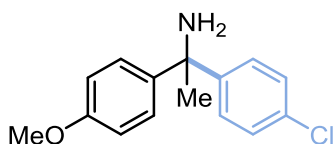

The title compound was prepared using **General Procedure C**. 1-chloro-4-iodobenzene was used for lithium-halogen exchange<sup>4</sup> in Et<sub>2</sub>O at -78 °C for 1 h. Yellow oil (100 mg, 0.38 mmol, 58%). **FT-IR** (thin film)  $\nu_{\max}$  (cm<sup>-1</sup>): 3310, 2962, 2835, 1608, 1509, 1247, 1180, 1033, 1012, 829. **<sup>1</sup>H NMR** (400 MHz, CDCl<sub>3</sub>):  $\delta$  7.30 (d,  $J$  = 8.9 Hz, 2 H), 7.25 – 7.21 (m, 4 H), 6.81 (d,  $J$  = 8.9 Hz, 2 H), 3.77 (s, 3 H), 1.84 (br s, 2 H, NH<sub>2</sub>), 1.79 (s, 3 H). **<sup>13</sup>C NMR** (101 MHz, CDCl<sub>3</sub>):  $\delta$  158.3, 148.8, 141.7, 132.2, 128.3, 127.8, 127.3, 113.6, 57.8, 55.4, 32.2. **HRMS** (ESI) Calcd for C<sub>15</sub>H<sub>14</sub>O<sup>35</sup>Cl [M-NH<sub>2</sub>]: 245.0728, found: 245.0729.

### Synthesis of 1-(4-methoxyphenyl)-1-(4-(trifluoromethyl)phenyl)ethan-1-amine (47)

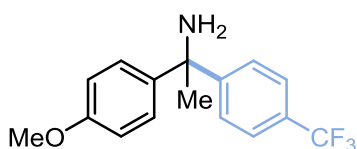

The title compound was prepared using **General Procedure C**. 1-iodo-4-(trifluoromethyl)benzene was used for lithium-halogen exchange<sup>4</sup> in Et<sub>2</sub>O at -78 °C for 1 h. Brown oil (129 mg, 0.44 mmol, 66%). **FT-IR** (thin film)  $\nu_{\max}$  (cm<sup>-1</sup>): 2967, 2840, 2812, 1615, 1510, 1325, 1250, 1117, 832. **<sup>1</sup>H NMR** (400 MHz, CDCl<sub>3</sub>):  $\delta$  7.55 – 7.49 (m, 4 H), 7.27 (d,  $J$  = 8.9 Hz, 2 H), 6.84 (d,  $J$  = 8.9 Hz, 2 H), 3.79 (s, 3 H), 1.92 (br s, 2 H, NH<sub>2</sub>), 1.84 (s, 3 H). **<sup>19</sup>F NMR** (377 MHz, CDCl<sub>3</sub>):  $\delta$  -62.4. **<sup>13</sup>C NMR** (101 MHz, CDCl<sub>3</sub>):  $\delta$  158.4,



154.2, 141.3, 128.6 (q,  $J_{C-F} = 32.5$  Hz), 127.4, 126.6, 125.2 (q,  $J_{C-F} = 3.7$  Hz), 124.4 (q,  $J_{C-F} = 272.9$  Hz), 113.7, 58.1, 55.4, 32.1. **HRMS** (ESI) Calcd for  $C_{16}H_{14}F_3O$  [M-NH<sub>2</sub>]: 279.0991, found: 279.0991.

### Synthesis of 2-amino-2-phenylpropanenitrile (**48**)

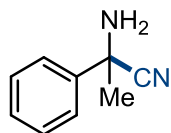

The title compound was prepared using **general method D**. Colourless oil (45.0 mg, 0.31 mmol, 95%). **FT-IR** (thin film)  $\nu_{max}$  (cm<sup>-1</sup>): 3376, 2980, 2905, 2225, 1682, 1448, 1202, 881, 764, 699. **<sup>1</sup>H NMR** (400 MHz, CDCl<sub>3</sub>):  $\delta$  7.75 – 7.59 (m, 2 H), 7.45 – 7.32 (m, 3 H), 2.10 (br s, 2 H, NH<sub>2</sub>), 1.77 (s, 3 H). **<sup>13</sup>C NMR** (101 MHz, CDCl<sub>3</sub>):  $\delta$  141.3, 129.0, 128.8, 125.0, 124.3, 53.8, 31.9. **HRMS** (ESI) Calcd for  $C_8H_{10}N$  [M-CN]: 120.0808, found: 120.0808.

### Synthesis of 2-amino-2-(4-methoxyphenyl)propanenitrile (**49**)

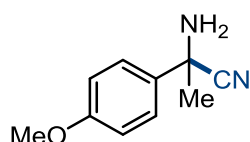

The title compound was prepared using **general method D**. The crude product was purified by column chromatography on neutralized silica gel (treated with Et<sub>3</sub>N prior to silica column chromatography) eluting with (pentane/EtOAc = 80:20 v:v) to EtOAc:MeOH:Et<sub>3</sub>N (70:20:10 v:v) to afford compound **49** as yellow oil (100 mg, 0.57 mmol, 86%). **FT-IR** (thin film)  $\nu_{max}$  (cm<sup>-1</sup>): 3376, 2933, 2839, 2235, 1606, 1510, 1248, 1178, 1029, 831. **<sup>1</sup>H NMR** (400 MHz, CD<sub>3</sub>CN):  $\delta$  7.55 (d,  $J = 8.9$  Hz, 2 H), 6.95 (d,  $J = 8.9$  Hz, 2 H), 3.79 (s, 3 H), 2.18 (br s, 2 H, NH<sub>2</sub>), 1.67 (s, 3 H). **<sup>13</sup>C NMR** (101 MHz, CDCl<sub>3</sub>):  $\delta$  159.9, 133.4, 126.4, 124.5, 114.2, 55.5, 53.3, 32.0. **HRMS** (ESI) Calcd for  $C_9H_{12}NO$  [M-CN]: 150.0913, found: 150.0913.

### Synthesis of ketimine and hemiaminal **49'**

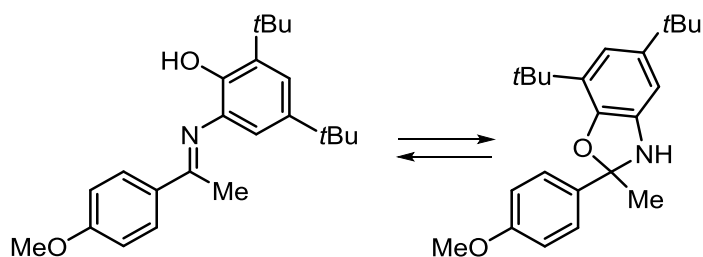

ketimine/hemiaminal ratio = 2.6:1

The title compound was prepared using **general method A**. Deep green viscous oil (Hemiaminal) and white solid (ketimine) (229 mg, 0.65 mmol, 98%). **FT-IR** (thin film)  $\nu_{\max}$  ( $\text{cm}^{-1}$ ): 3396, 2958, 2905, 2870, 2300, 1675, 1599, 1250, 1118, 999, 832, 773. **Ketimine**:  $^1\text{H NMR}$  (400 MHz,  $\text{CDCl}_3$ ):  $\delta$  8.06 – 7.97 (m, 2 H), 7.13 (d,  $J = 2.3$  Hz, 1 H), 6.99 – 6.94 (m, 2 H), 6.70 (d,  $J = 2.3$  Hz, 1 H), 6.31 (s, 1 H, OH), 3.89 (s, 3 H), 2.47 (s, 3 H), 1.46 (s, 9 H), 1.32 (s, 9 H).  $^{13}\text{C NMR}$  (101 MHz,  $\text{CDCl}_3$ ):  $\delta$  166.4, 161.9, 146.1, 140.9, 135.9, 134.6, 132.3, 129.0, 120.3, 115.3, 113.8, 55.5, 35.0, 34.5, 31.8, 29.7, 17.5. **Hemiaminal**:  $^1\text{H NMR}$  (400 MHz,  $\text{CDCl}_3$ ):  $\delta$  7.60 – 7.53 (m, 2 H), 6.92 – 6.87 (m, 2 H), 6.84 (d,  $J = 2.3$  Hz, 1 H), 6.77 (d,  $J = 2.3$  Hz, 1 H), 3.81 (s, 3 H), 1.86 (s, 3 H), 1.41 (s, 9 H), 1.28 (s, 9 H).  $^{13}\text{C NMR}$  (101 MHz,  $\text{CDCl}_3$ ): 159.4, 146.7, 143.4, 137.0, 136.6, 131.2, 126.5, 116.8, 113.7, 109.2, 100.2, 55.4, 34.7, 34.3, 31.9, 29.7, 28.9. **HRMS** (ESI) Calcd for  $\text{C}_{23}\text{H}_{32}\text{NO}_2$  [(M+H) $^+$ ]: 354.2428 found: 354.2433.

### Synthesis of (*E*)-2-((3,5-di-*tert*-butyl-6-oxocyclohexa-2,4-dien-1-ylidene)amino)-2-(4-methoxyphenyl) propanenitrile (49'')

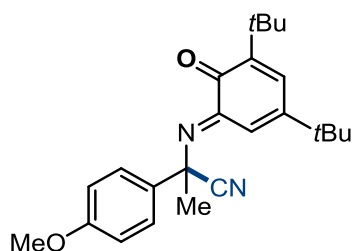

The title compound was prepared using **general method D**. The cleavage of phenol unit was performed by using 1.2 equiv of  $\text{I}_2$  and 5 equiv NaOH (1 M) instead of  $\text{H}_5\text{IO}_6$ . The crude product was purified by column chromatography on silica gel using (pentane/ EtOAc = 80:20 v:v) and followed by EtOAc:MeOH:Et $_3$ N (70:20:10 v:v) as solvent system. Brown oil (249 mg, 0.66 mmol, 99%). **FT-IR** (thin film)  $\nu_{\max}$  ( $\text{cm}^{-1}$ ): 3310, 2963, 2865, 2361, 1677, 1605, 1511, 1253, 1176, 1031, 957, 909, 833, 731.  $^1\text{H NMR}$  (400 MHz,  $\text{CDCl}_3$ ):  $\delta$  7.41 (d,  $J = 8.6$  Hz, 2 H), 6.92 – 6.84 (m, 3 H), 6.47 (d,  $J = 2.1$  Hz, 1 H), 3.80 (s, 3 H), 2.17 (s, 3 H), 1.27 (s, 9 H), 1.06 (s, 9 H).  $^{13}\text{C NMR}$  (101 MHz,  $\text{CDCl}_3$ ):  $\delta$  183.9, 159.8, 159.1, 154.6, 149.5, 134.2, 133.0, 126.2, 120.8, 114.9, 114.2, 59.5, 55.2, 35.6, 35.2, 34.0, 29.2, 28.0. **HRMS** (ESI) Calcd for  $\text{C}_{24}\text{H}_{31}\text{N}_2\text{O}_2$  [(M+H) $^+$ ]: 379.2380, found: 379.2373.

### Synthesis of 2-amino-2-(4-fluorophenyl)propanenitrile (50)

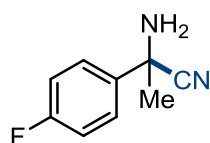

The title compound was prepared using **general method D**. The crude product was purified by column chromatography on neutralized silica gel (treated with Et $_3$ N prior to column) using (pentane/

EtOAc = 80:20 v:v) and followed by EtOAc:MeOH:Et<sub>3</sub>N (70:20:10 v:v) as solvent system. Yellow oil (57.0 mg, 0.35 mmol, 48%). **FT-IR** (thin film)  $\nu_{\max}$  (cm<sup>-1</sup>): 3379, 2933, 2240, 1602, 1509, 1225, 1160, 838. **<sup>1</sup>H NMR** (400 MHz, CDCl<sub>3</sub>):  $\delta$  7.65 (dd,  $J$  = 8.9, 5.1 Hz, 2 H), 7.09 (t,  $J$  = 8.6 Hz, 2 H), 2.09 (br s, 2 H, NH<sub>2</sub>), 1.75 (s, 3 H). **<sup>19</sup>F NMR** (377 MHz, CD<sub>3</sub>CN):  $\delta$  -110.8. **<sup>13</sup>C NMR** (126 MHz, CDCl<sub>3</sub>):  $\delta$  162.8 (d,  $J_{C-F}$  = 248.1 Hz), 137.2 (d,  $J_{C-F}$  = 4.0 Hz), 127.0 (d,  $J_{C-F}$  = 8.4 Hz), 124.1, 115.9 (d,  $J_{C-F}$  = 21.7 Hz), 53.3, 32.1. **HRMS** (ESI) Calcd for C<sub>8</sub>H<sub>9</sub>FN [M-CN]: 138.0714, found: 138.0713.

### Synthesis of 2-amino-2-propylpentanenitrile (51)

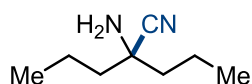

The title compound was prepared using **general method D**. Yellow oil (115 mg, 0.82 mmol, 94%). **FT-IR** (thin film)  $\nu_{\max}$  (cm<sup>-1</sup>): 3376, 2962, 2935, 2876, 2221, 1465, 1270, 1164, 836. **<sup>1</sup>H NMR** (400 MHz, CDCl<sub>3</sub>):  $\delta$  1.75 (br s, 2 H, NH<sub>2</sub>), 1.68 – 1.47 (m, 8 H), 0.99 (t,  $J$  = 7.1 Hz, 6 H). **<sup>13</sup>C NMR** (101 MHz, CDCl<sub>3</sub>):  $\delta$  124.1, 53.9, 42.5, 17.7, 14.2. **HRMS** (ESI) Calcd for C<sub>8</sub>H<sub>17</sub>N<sub>2</sub> [(M+H)<sup>+</sup>]: 141.1386, found: 141.1385.

### Synthesis of 2-amino-2-methylheptanenitrile (52)

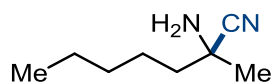

The title compound was prepared using **general method D**. Pale-yellow oil (111 mg, 0.79 mmol, 91%). **FT-IR** (thin film)  $\nu_{\max}$  (cm<sup>-1</sup>): 3374, 2931, 2860, 2223, 1610, 1460, 1220, 1185, 863. **<sup>1</sup>H NMR** (400 MHz, CDCl<sub>3</sub>):  $\delta$  1.79 (br s, 2 H, NH<sub>2</sub>), 1.65 – 1.56 (m, 2 H), 1.52 – 1.37 (m, 5 H), 1.36 – 1.23 (m, 4 H), 0.90 – 0.85 (m, 3 H). **<sup>13</sup>C NMR** (101 MHz, CDCl<sub>3</sub>):  $\delta$  124.6, 49.9, 41.8, 31.6, 27.7, 24.3, 22.5, 14.0. **HRMS** (ESI) Calcd for C<sub>8</sub>H<sub>17</sub>N<sub>2</sub> [(M+H)<sup>+</sup>]: 141.1386, found: 141.1387.

### Synthesis of 1-aminocyclooctane-1-carbonitrile (53)

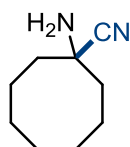

The title compound was prepared using **general method D**. Pale-yellow oil (212 mg, 1.39 mmol, 89%). **FT-IR** (thin film)  $\nu_{\max}$  (cm<sup>-1</sup>): 3370, 3303, 2932, 2854, 2227, 1280, 1134, 883, 849. **<sup>1</sup>H NMR** (400 MHz, CD<sub>3</sub>CN):  $\delta$  1.91 – 1.77 (m, 4 H), 1.76 – 1.43 (m, 10 H). **<sup>13</sup>C NMR** (101 MHz, CD<sub>3</sub>CN):  $\delta$  126.5, 54.8, 36.4, 28.5, 25.0, 22.5. **HRMS** (ESI) Calcd for C<sub>9</sub>H<sub>17</sub>N<sub>2</sub> [(M+H)<sup>+</sup>]: 153.1386, found: 153.1386.

### Synthesis of 4-aminotetrahydro-2H-pyran-4-carbonitrile (**54**)<sup>7</sup>

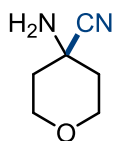

The title compound was prepared using **general method D**. Yellow oil (121 mg, 0.96 mmol, 97%). The spectroscopic data of compound **54** were identical to those reported. **<sup>1</sup>H NMR** (400 MHz, CD<sub>3</sub>CN): δ 4.03 – 3.93 (m, 2 H), 3.66 (ddd, *J* = 12.5, 10.3, 2.5 Hz, 2 H), 1.99 (ddt, *J* = 13.5, 4.3, 2.1 Hz, 2 H), 1.84 (br s, 2 H, NH<sub>2</sub>), 1.75 (ddd, *J* = 13.9, 10.3, 4.2 Hz, 2 H). **<sup>13</sup>C NMR** (101 MHz, CD<sub>3</sub>CN): δ 122.4, 63.1, 48.1, 36.7. **HRMS** (ESI) Calcd for C<sub>6</sub>H<sub>11</sub>N<sub>2</sub>O [(M+H)<sup>+</sup>]: 127.0866, found: 127.0866.

### Synthesis of 4-aminotetrahydro-2H-thiopyran-4-carbonitrile 1,1-dioxide (**55**)

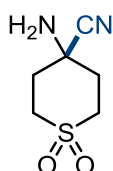

The title compound was prepared using **general method D**. White solid (49.0 mg, 0.28 mmol, 42%). **FT-IR** (thin film)  $\nu_{\text{max}}$  (cm<sup>-1</sup>): 3370, 3303, 2975, 2935, 2227, 1332, 1279, 1124, 882, 848. **<sup>1</sup>H NMR** (400 MHz, CD<sub>3</sub>CN): δ 3.31- 3.24 (m, 2 H), 2.99 – 2.92 (m, 2 H), 2.45 – 2.36 (m, 2 H), 2.34 – 2.22 (m, 2 H), 2.16 (br s, 2 H, NH<sub>2</sub>). **<sup>13</sup>C NMR** (126 MHz, CD<sub>3</sub>CN): δ 123.9, 48.7, 47.2, 35.5. **HRMS** (ESI) Calcd for C<sub>5</sub>H<sub>10</sub>NO<sub>2</sub>S [M-CN]: 148.0427, found: 148.0427.

### Synthesis of 4-amino-1-methylpiperidine-4-carbonitrile (**56**)<sup>7</sup>

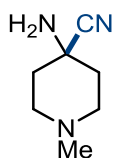

The title compound was prepared using **general method D**. 10 eq of coupling partner and carrying out the oxidation for 1 hour. Yellow oil (883 mg, 6.34 mmol, 72%). The spectroscopic data of compound **56** were identical to those reported. **<sup>1</sup>H NMR** (400 MHz, CDCl<sub>3</sub>): δ 4.58 (br s, 2 H), 2.81 (dt, *J* = 12.8, 4.2 Hz, 2 H), 2.38 – 2.26 (m, 5 H), 2.22 – 2.12 (m, 2 H), 1.83 (ddd, *J* = 14.1, 10.9, 3.9 Hz, 2 H). **<sup>13</sup>C NMR** (101 MHz, CDCl<sub>3</sub>): δ 119.8, 60.2, 51.5, 45.7, 34.2. **HRMS** (ESI) Calcd for C<sub>7</sub>H<sub>14</sub>N<sub>3</sub> [(M+H)<sup>+</sup>]: 140.1182, found: 140.1182.

### Synthesis of 2-((3,5-di-*tert*-butyl-2-hydroxyphenyl)amino)-2-phenylpropanenitrile (57)

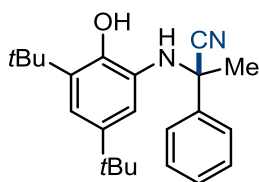

The title compound was prepared using **general method D** without oxidation. White crystals (1.40 g, 3.99 mmol, 97%). The recrystallization was performed using pentane: EtOAc (10:1) solvent system. mp = 141-148 °C. **FT-IR** (thin film)  $\nu_{\max}$  (cm<sup>-1</sup>): 3390, 2959, 2906, 2870, 2230, 1598, 1485, 1227, 761, 699. **<sup>1</sup>H NMR** (400 MHz, CD<sub>3</sub>CN):  $\delta$  7.68 – 7.60 (m, 2 H), 7.47 – 7.39 (m, 2 H), 7.39 – 7.31 (m, 1 H), 6.88 (d,  $J$  = 2.3 Hz, 1 H), 6.63 (d,  $J$  = 2.3 Hz, 1 H), 6.10 (s, 1 H, OH), 4.67 (s, 1 H, NH), 1.93 (s, 3 H), 1.36 (s, 9 H), 1.07 (s, 9 H). **<sup>13</sup>C NMR** (101 MHz, CD<sub>3</sub>CN):  $\delta$  145.0, 142.9, 141.3, 137.3, 133.2, 129.9, 129.4, 126.1, 122.5, 117.7, 116.3, 59.2, 35.5, 35.0, 31.7, 31.6, 30.1. **HRMS** (ESI) Calcd for C<sub>23</sub>H<sub>31</sub>N<sub>2</sub>O [(M+H)<sup>+</sup>]: 351.2431, found: 351.2431.

### Synthesis of *tert*-butyl 4-amino-4-(4-fluorophenyl)-2-methylenepentanoate (58)

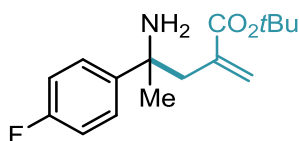

**General Procedure E** was carried out using 4-fluoro- $\alpha$ -methylbenzylamine (33.0  $\mu$ L, 0.25 mmol). Silica gel column chromatography (EtOAc:Pentane 10:90 – 50:50 v:v) gave a colourless oil, (21.0 mg, 0.08, 30%). **FT-IR** (thin film):  $\nu_{\max}$  (cm<sup>-1</sup>) = 2980, 1709, 1626, 1602, 15039. **<sup>1</sup>H NMR** (400 MHz, CD<sub>3</sub>CN):  $\delta$  7.53 – 7.43 (m, 2 H), 7.14 – 6.88 (m, 2 H), 5.97 (d,  $J$  = 1.9 Hz, 1 H), 5.33 – 5.23 (m, 1 H), 2.66 (dd,  $J$  = 1.9, 0.9 Hz, 2 H), 1.38 (s, 3 H), 1.37 (s, 9 H). **<sup>19</sup>F NMR** (377 MHz, DMSO-*d*<sub>6</sub>):  $\delta$  -118.12 (ddd,  $J$  = 14.2, 9.1, 5.5 Hz). **<sup>13</sup>C NMR** (101 MHz, CD<sub>3</sub>CN):  $\delta$  167.8, 162.2 (d,  $J$  = 242.1 Hz), 146.0 (d,  $J$  = 3.1 Hz), 140.4, 128.6 (d,  $J$  = 7.9 Hz), 127.3, 115.1 (d,  $J$  = 21.3 Hz), 81.1, 55.9, 46.6, 31.0, 28.1. **HRMS** (ESI) Calcd for C<sub>16</sub>H<sub>22</sub>O<sub>2</sub>N<sub>1</sub>F<sub>1</sub> [(M+H)<sup>+</sup>]: 280.1707, found: 280.1705.

### Synthesis of *tert*-butyl 4-amino-4-(4-chlorophenyl)-2-methylenepentanoate (58')

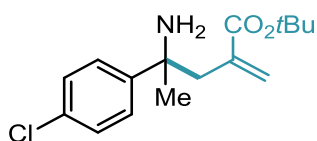

**General Procedure E** was carried out using 4-chloro- $\alpha$ -methylbenzylamine (36.0  $\mu$ L, 0.25 mmol). Silica gel column chromatography (EtOAc:Pentane 10:90 – 50:50 v:v) gave a colourless oil, (16.2 mg,

0.05 mmol, 22%). **FT-IR** (thin film):  $\nu_{\max}$  ( $\text{cm}^{-1}$ ) = 2976, 2931, 1707.  **$^1\text{H}$  NMR** (400 MHz,  $\text{CD}_3\text{CN}$ ):  $\delta$  7.38 (d,  $J$  = 8.7 Hz, 2 H), 7.21 (d,  $J$  = 8.8 Hz, 2 H), 5.89 (d,  $J$  = 1.9 Hz, 1 H), 5.21 (dt,  $J$  = 1.9, 0.9 Hz, 1 H), 2.58 (d,  $J$  = 0.9 Hz, 2 H), 1.71 (s, 2 H), 1.30 (s, 3 H), 1.28 (s, 9 H).  **$^{13}\text{C}$  NMR** (101 MHz,  $\text{CD}_3\text{CN}$ )  $\delta$  167.8, 148.8, 140.3, 132.3, 128.6, 127.3, 81.1, 55.9, 46.5, 30.9, 28.1, 28.1. **HRMS** (ESI) Calcd for  $\text{C}_{16}\text{H}_{23}\text{O}_2\text{NCl}$  [(M+H)<sup>+</sup>]: 264.1412, found 296.1409.

### Synthesis of *tert*-butyl 4-amino-4-phenyl-2-methylenepentanoate (59)

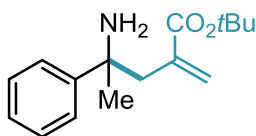

**General Procedure E** was carried out using  $\alpha$ -methylbenzylamine (32.0  $\mu\text{L}$ , 0.25 mmol). Silica gel column chromatography (EtOAc: Pentane 10:90 – 50:50 v:v) gave a colourless oil, (20.2 mg, 0.08 mmol, 31%). **FT-IR** (thin film):  $\nu_{\max}$  ( $\text{cm}^{-1}$ ) = 2976, 2930, 1709, 1626.  **$^1\text{H}$  NMR** (400 MHz,  $\text{CD}_3\text{CN}$ ):  $\delta$  7.55 – 7.42 (m, 2 H), 7.30 (dd,  $J$  = 8.4, 7.0 Hz, 2 H), 7.21 – 7.15 (m, 1 H), 5.97 (d,  $J$  = 2.0 Hz, 1 H), 5.28 (dt,  $J$  = 2.0, 1.0 Hz, 1 H), 2.79 – 2.50 (m, 2 H), 2.02 (s, 7 H), 1.39 (s, 9 H), 1.38 (s, 3 H).  **$^{13}\text{C}$  NMR** (101 MHz,  $\text{CD}_3\text{CN}$ ):  $\delta$  167.9, 150.1, 140.5, 128.8, 127.1, 127.0, 126.6, 81.1, 56.1, 46.5, 30.8, 28.1. **HRMS** (ESI) Calcd for  $\text{C}_{16}\text{H}_{24}\text{O}_2\text{N}_1$  [(M+H)<sup>+</sup>]: 262.1802, found: 262.1800.

### Synthesis of *tert*-butyl 4-amino-4-(4-methoxyphenyl)-2-methylenepentanoate (60)

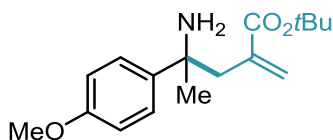

**General Procedure E** was carried out using 4-methoxy- $\alpha$ -methylbenzylamine (37.0  $\mu\text{L}$ , 0.25 mmol). Silica gel column chromatography (EtOAc: Pentane 10:90 – 50:50 v:v) gave a colourless oil, (31.3 mg, 0.11 mmol, 43%). **FT-IR** (thin film):  $\nu_{\max}$  ( $\text{cm}^{-1}$ ) = 2977, 1708, 1611, 1512, 1458.  **$^1\text{H}$  NMR** (400 MHz,  $\text{CD}_3\text{CN}$ ):  $\delta$  7.48 (d,  $J$  = 8.8 Hz, 2 H), 6.94 (d,  $J$  = 8.8 Hz, 2 H), 6.07 (d,  $J$  = 2.1 Hz, 1 H), 5.40 – 5.35 (m, 1 H), 3.86 (s, 3 H), 2.75 (dd,  $J$  = 2.6, 0.9 Hz, 2 H), 1.48 (s, 9 H), 1.46 (s, 3 H).  **$^{13}\text{C}$  NMR** (101 MHz,  $\text{CD}_3\text{CN}$ ):  $\delta$  167.9, 159.0, 142.1, 140.7, 127.7, 127.0, 114.0, 81.0, 55.8, 55.6, 46.7, 30.9, 28.1. **HRMS** (ESI) Calcd for  $\text{C}_{17}\text{H}_{26}\text{O}_3\text{N}_1$  [(M+H)<sup>+</sup>]: 292.1907, found 292.1910.

### Synthesis of *tert*-butyl 4-amino-4-(4-methylphenyl)-2-methylenepentanoate (61)

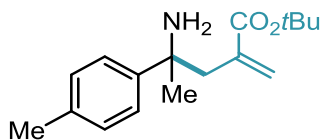

**General Procedure E** was carried out using 4-methyl- $\alpha$ -methylbenzylamine (37.0  $\mu$ L, 0.25 mmol). Silica gel column chromatography (EtOAc: Pentane 10:90 – 50:50 v:v) gave a colourless oil, (22.0 mg, 0.08 mmol, 32%). **FT-IR** (thin film):  $\nu_{\max}$  ( $\text{cm}^{-1}$ ) = 2980, 1710.  **$^1\text{H NMR}$**  (400 MHz,  $\text{CD}_3\text{CN}$ ):  $\delta$  7.34 (d,  $J$  = 8.3 Hz, 2 H), 7.11 (d,  $J$  = 7.7 Hz, 2 H), 5.96 (d,  $J$  = 2.0 Hz, 1 H), 5.28 (dd,  $J$  = 2.0, 1.1 Hz, 1 H), 2.72 – 2.58 (m, 2 H), 2.28 (s, 3H), 1.38 (s, 9 H), 1.36 (s, 3 H).  **$^{13}\text{C NMR}$**  (101 MHz,  $\text{CD}_3\text{CN}$ ):  $\delta$  167.9, 147.0, 140.6, 136.5, 129.4, 127.0, 126.5, 81.0, 55.9, 46.6, 30.7, 28.1, 20.9. **HRMS** (ESI) Calcd for  $\text{C}_{17}\text{H}_{26}\text{O}_2\text{N}$  [(M+H) $^+$ ]: 276.1958, found 276.1958.

### Synthesis of *tert*-butyl 2-((1-amino-2,3-dihydro-1H-inden-1-yl)methyl)acrylate (62)

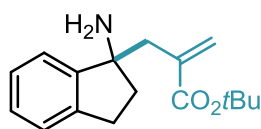

**General Procedure E** was carried out using 1-aminoindane (32.0  $\mu$ L, 0.25 mmol). Silica gel column chromatography (EtOAc: Pentane 10:90 – 50:50 v:v) gave an amorphous solid, (25.3 mg, 0.09 mmol, 37%). **FT-IR** (thin film):  $\nu_{\max}$  ( $\text{cm}^{-1}$ ) = 2980, 1707, 1626.  **$^1\text{H NMR}$**  (400 MHz,  $\text{CD}_3\text{CN}$ ):  $\delta$  7.23 – 7.12 (m, 4 H), 6.03 (d,  $J$  = 2.0 Hz, 1 H), 5.41 (dd,  $J$  = 2.0, 1.0 Hz, 1 H), 2.82 (ddd,  $J$  = 9.1, 5.2, 4.0 Hz, 2 H), 2.72 (d,  $J$  = 13.1 Hz, 1 H), 2.48 (dd,  $J$  = 13.2, 1.0 Hz, 1 H), 2.21 (ddd,  $J$  = 12.7, 6.7, 3.9 Hz, 1 H), 1.95 (br s, 2 H), 1.79 (dt,  $J$  = 12.7, 8.8 Hz, 1 H), 1.38 (s, 9 H).  **$^{13}\text{C NMR}$**  (101 MHz,  $\text{CD}_3\text{CN}$ ):  $\delta$  167.9, 151.0, 143.6, 140.6, 128.1, 127.3, 127.2, 125.5, 123.8, 81.1, 65.5, 42.4, 41.6, 30.0, 28.1. **HRMS** (ESI) Calcd for  $\text{C}_{17}\text{H}_{24}\text{O}_2\text{N}$  [(M+H) $^+$ ]: 274.1802, found 274.1802.

### Synthesis of 5-(4-methoxyphenyl)-5-methyl-3-methylenepyrrolidin-2-one (63)

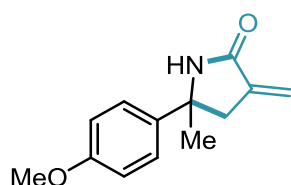

**General Procedure E** was followed using 4-methoxy- $\alpha$ -methylbenzylamine (37.0  $\mu$ L, 0.25 mmol) and ethyl 2-((phenylsulfonyl)methyl)acrylate (254 mg, 1.00 mmol) as coupling partner. Work up with NaOH (1M) initiated an *in situ* lactamization, and purification *via* silica gel column chromatography (EtOAc: Pentane 10:90-40:60 v:v) gave an amorphous solid, (17.9 mg, 0.08 mmol, 33%). mp = 98-100  $^{\circ}\text{C}$ . **FT-IR** (thin film):  $\nu_{\max}$  ( $\text{cm}^{-1}$ ) = 3212, 2968, 1695, 1658, 1613, 1583, 1514.  **$^1\text{H NMR}$**  (400 MHz,  $\text{CD}_3\text{CN}$ ):  $\delta$  7.29 (d,  $J$  = 8.9 Hz, 2 H), 7.11 (s, 1 H), 6.90 (d,  $J$  = 8.8 Hz, 2 H), 5.81 (td,  $J$  = 2.7, 1.1 Hz, 1 H), 5.28 (tt,  $J$  = 2.4, 1.1 Hz, 1 H), 3.77 (s, 3 H), 2.93 (qt,  $J$  = 16.8, 2.5 Hz, 2 H), 1.59 (s, 3 H).  **$^{13}\text{C NMR}$**  (101

MHz, CD<sub>3</sub>CN):  $\delta$  169.9, 159.6, 141.8, 140.3, 127.0, 115.8, 114.7, 59.0, 55.9, 45.0, 30.1 **HRMS** (ESI) Calcd for C<sub>13</sub>H<sub>16</sub>O<sub>2</sub>N [(M+H)<sup>+</sup>]: 218.1176, found 218.1177.

### Synthesis of 2-methyl-1-phenylpropan-2-amine (*Phentermine*) (**64**)<sup>11</sup>

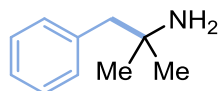

(*Phentermine*)

The title compound was prepared using **general method A**. 10 equiv of BnMgCl (2 M in THF) was used instead of allylmagnesium bromide for the addition. Pale yellow oil (134 mg, 0.90 mmol, 53%). The spectroscopic data of compound **64** were identical to those reported. **<sup>1</sup>H NMR** (400 MHz, CDCl<sub>3</sub>):  $\delta$  7.33 – 7.27 (m, 2 H), 7.27 – 7.21 (m, 1 H), 7.21 – 7.16 (m, 2 H), 2.66 (s, 2 H), 1.30 – 1.19 (br s, 2 H), 1.12 (s, 6 H). **<sup>13</sup>C NMR** (101 MHz, CDCl<sub>3</sub>):  $\delta$  138.6, 130.6, 128.1, 126.4, 51.3, 50.1, 30.6. **HRMS** (ESI) Calcd for C<sub>10</sub>H<sub>16</sub>N [(M+H)<sup>+</sup>]: 150.1277, found: 150.1277.

### Synthesis of 2-(adamantan-1-yl)pent-4-en-2-amine hydrochloride (*from Rimantadine or Flumadine*) (**65**)

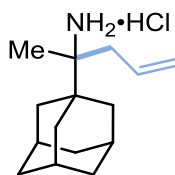

(*from Rimantadine*)

The title compound was prepared using **general method B**. Yellow solid (198 mg, 0.77 mmol, 54%). **FT-IR** (thin film)  $\nu_{\max}$  (cm<sup>-1</sup>): 3032, 2904, 2851, 1641, 1516, 1449, 1197, 919, 731. **<sup>1</sup>H NMR** (400 MHz, CDCl<sub>3</sub>):  $\delta$  8.20 (br s, 3 H, NH<sub>3</sub><sup>+</sup>), 6.21 – 6.08 (m, 1 H), 5.21 – 5.12 (m, 2 H), 2.63 (dd,  $J$  = 14.5, 5.9 Hz, 1 H), 2.34 (dd,  $J$  = 14.5, 8.3 Hz, 1 H), 2.03 (s, 3 H), 1.86 – 1.70 (m, 6 H), 1.64 (s, 6 H), 1.26 (s, 3 H). **<sup>13</sup>C NMR** (101 MHz, CDCl<sub>3</sub>):  $\delta$  132.9, 120.0, 62.5, 39.0, 38.2, 36.6, 36.1, 28.4, 18.5. **HRMS** (ESI) Calcd for C<sub>15</sub>H<sub>26</sub>N [(M-Cl)<sup>+</sup>]: 220.2060, found: 220.2059.

### Synthesis of 2-(adamantan-1-yl)-2-aminopropanenitrile (*from Rimantadine or Flumadine*) (**66**)

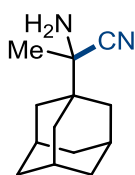

(*from Rimantadine*)



The title compound was prepared using **general method D**. White powder (100 mg, 0.49 mmol, 88%). **FT-IR** (thin film)  $\nu_{\max}$  ( $\text{cm}^{-1}$ ): 3376, 2904, 2850, 2218, 1630, 1450, 1266, 1102, 851, 815.  **$^1\text{H NMR}$**  (400 MHz,  $\text{CD}_3\text{CN}$ ):  $\delta$  2.03 (m, 3 H), 1.76 – 1.62 (m, 12 H), 1.32 (s, 3 H).  **$^{13}\text{C NMR}$**  (101 MHz,  $\text{CD}_3\text{CN}$ ):  $\delta$  125.3, 58.4, 38.6, 37.4, 36.8, 29.3, 21.9. **HRMS** (ESI) Calcd for  $\text{C}_{13}\text{H}_{21}\text{N}_2$  [(M+H) $^+$ ]: 205.1699, found: 205.1700.

### Synthesis of 1-(2,6-dimethylphenoxy)-2-methylpent-4-en-2-amine (**67**)

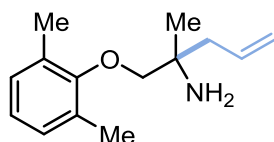

(from *Mexiletine*)

The title compound was prepared using **general method B**. The HCl salt of compound **67** was basified with 1 M NaOH (1 mL), extracted with  $\text{CHCl}_3$  (3 x 20 mL) and dried by  $\text{Na}_2\text{SO}_4$ . After removal of solvents gave the desired 1-(2,6-dimethylphenoxy)-2-methylpent-4-en-2-amine **67** as a pale-yellow oil (150 mg, 0.68 mmol, 57%). **FT-IR** (thin film)  $\nu_{\max}$  ( $\text{cm}^{-1}$ ): 3380, 2968, 2922, 2840, 1639, 1476, 1263, 1202, 1020, 767.  **$^1\text{H NMR}$**  (400 MHz,  $\text{CDCl}_3$ ):  $\delta$  7.01 (d,  $J = 7.3$  Hz, 2 H), 6.92 (dd,  $J = 8.3, 6.6$  Hz, 1 H), 5.98 – 5.88 (m, 1 H), 5.19 – 5.13 (m, 2 H), 3.54 (dd,  $J = 10.6, 8.6$  Hz, 2 H), 2.38 – 2.34 (m, 2 H), 2.29 (s, 6 H), 1.68 (br s, 2 H,  $\text{NH}_2$ ), 1.25 (s, 3 H).  **$^{13}\text{C NMR}$**  (101 MHz,  $\text{CDCl}_3$ ):  $\delta$  155.2, 133.9, 131.0, 129.1, 124.0, 118.8, 79.6, 52.8, 44.5, 25.1, 16.5. **HRMS** (ESI) Calcd for  $\text{C}_{14}\text{H}_{22}\text{NO}$  [(M+H) $^+$ ]: 220.1696, found: 220.1697.

### Synthesis of 2-amino-2-methyl-3-phenylpropanenitrile (**68**)

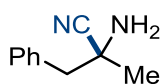

(from *Amphetamine*)

The title compound was prepared using **general method D**. Pale yellow oil (87.0 mg, 0.54 mmol, 94%). **FT-IR** (thin film)  $\nu_{\max}$  ( $\text{cm}^{-1}$ ): 3374, 3031, 2925, 2361, 1603, 1454, 846, 760, 702.  **$^1\text{H NMR}$**  (400 MHz,  $\text{CD}_3\text{CN}$ ):  $\delta$  7.44 – 7.26 (m, 5 H), 2.90 (q,  $J = 13.3$  Hz, 2 H), 1.97 (br s, 2 H,  $\text{NH}_2$ ), 1.43 (s, 3 H).  **$^{13}\text{C NMR}$**  (101 MHz,  $\text{CD}_3\text{CN}$ ):  $\delta$  136.6, 131.5, 129.2, 128.3, 125.3, 51.7, 48.0, 27.8. **HRMS** (ESI) Calcd for  $\text{C}_{10}\text{H}_{13}\text{N}_2$  [(M+H) $^+$ ]: 161.1073, found: 161.1073.

## 6: NMR Spectra:

Aug24-2017-34-DV-462-0.1.fid  
 Instrument AVG400  
 Group DJD  
 Chemist Vasu  
 Project Account Code other  
 DV-462-0  
 h1acq.crl CDCl3 {C:\NMR} djgrp 34

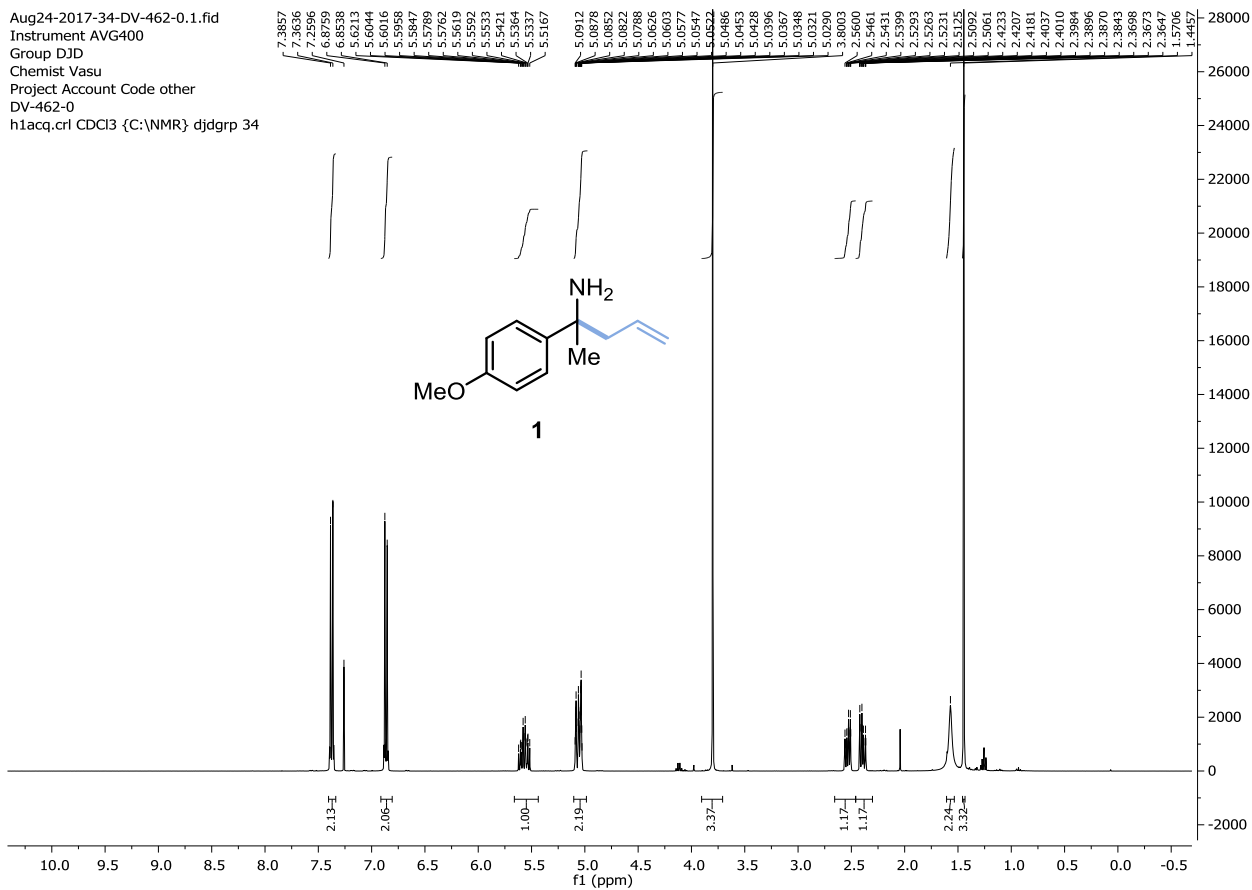

Aug24-2017-32-DV-462-1.2.fid  
 Instrument AVH400  
 Chemist Vasu  
 Group DJD  
 Project Account Code other  
 DV-462-1  
 c13acq.crl CDCl3 {C:\NMR} djgrp 32

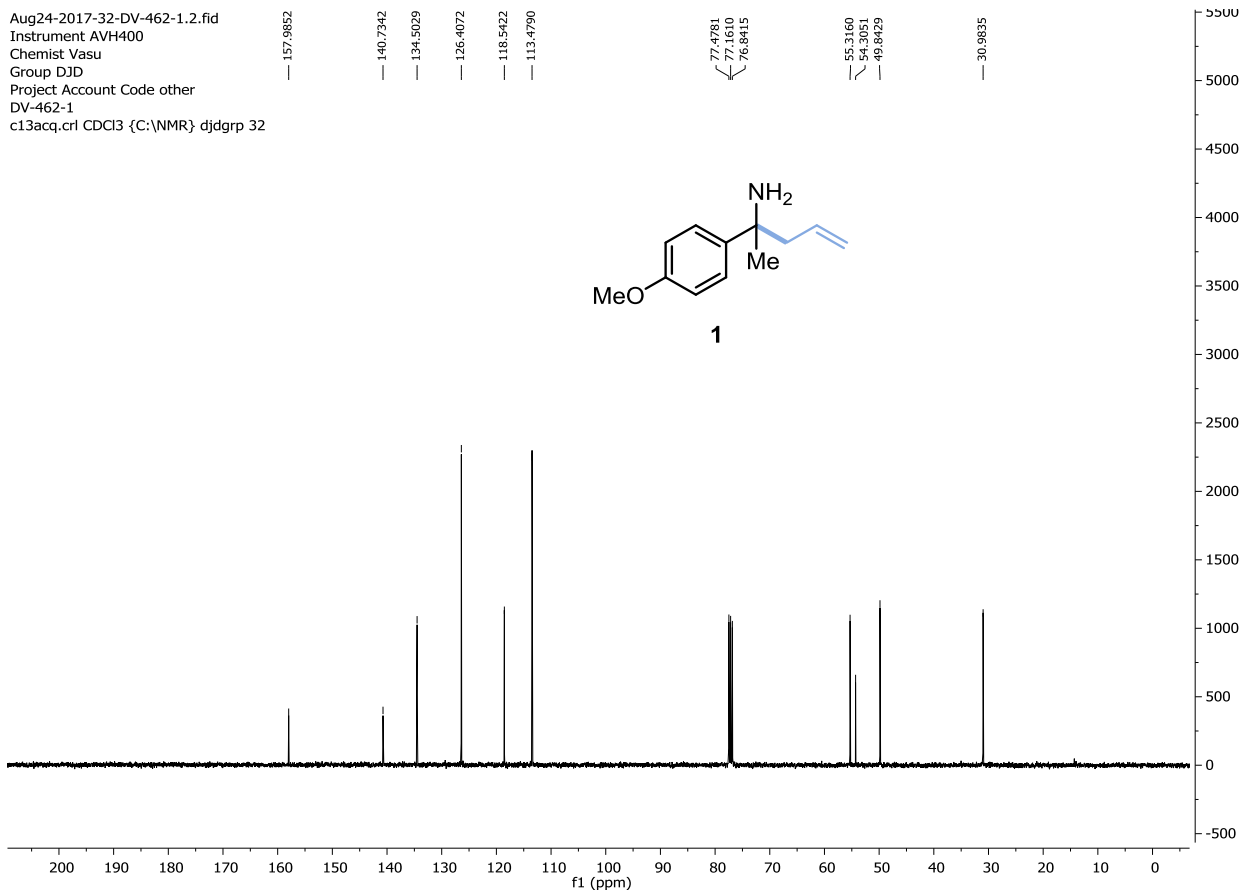

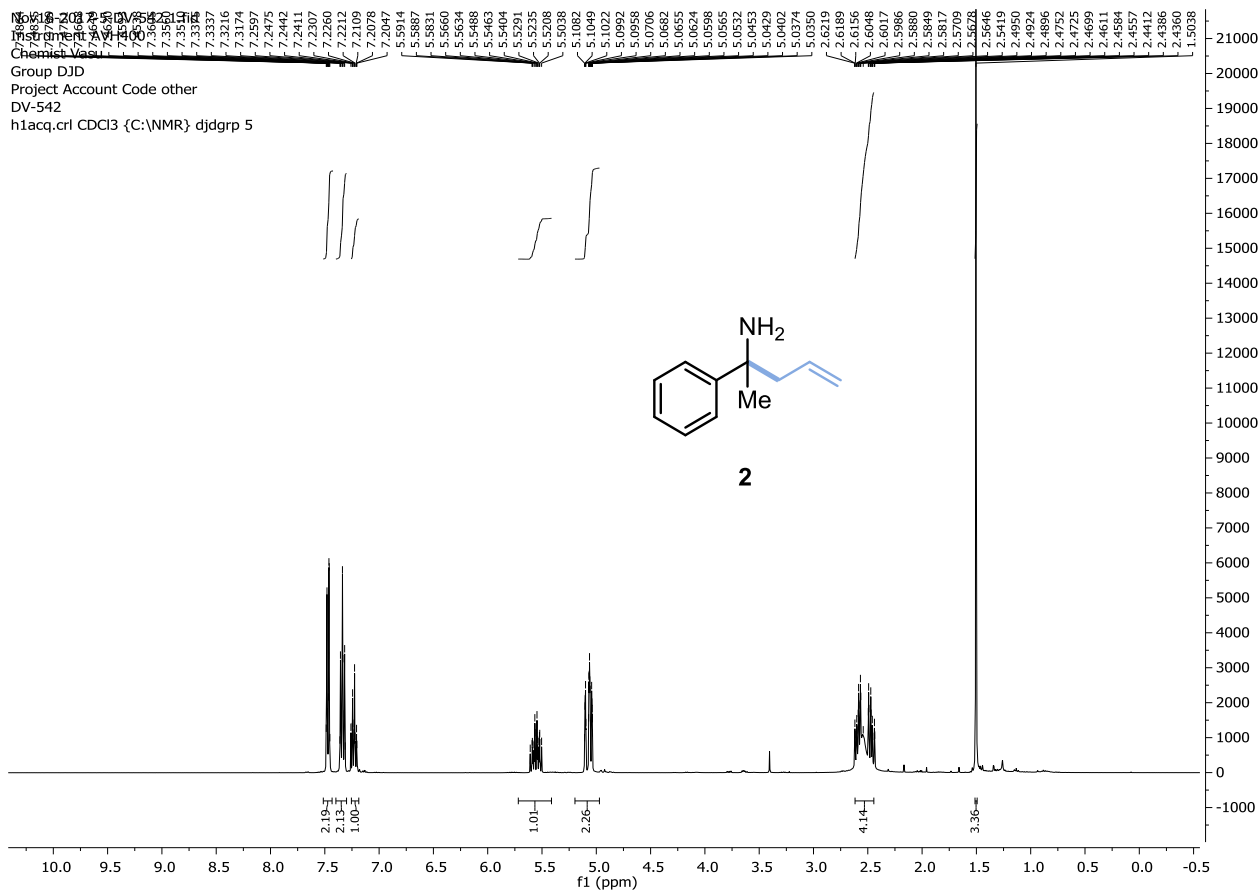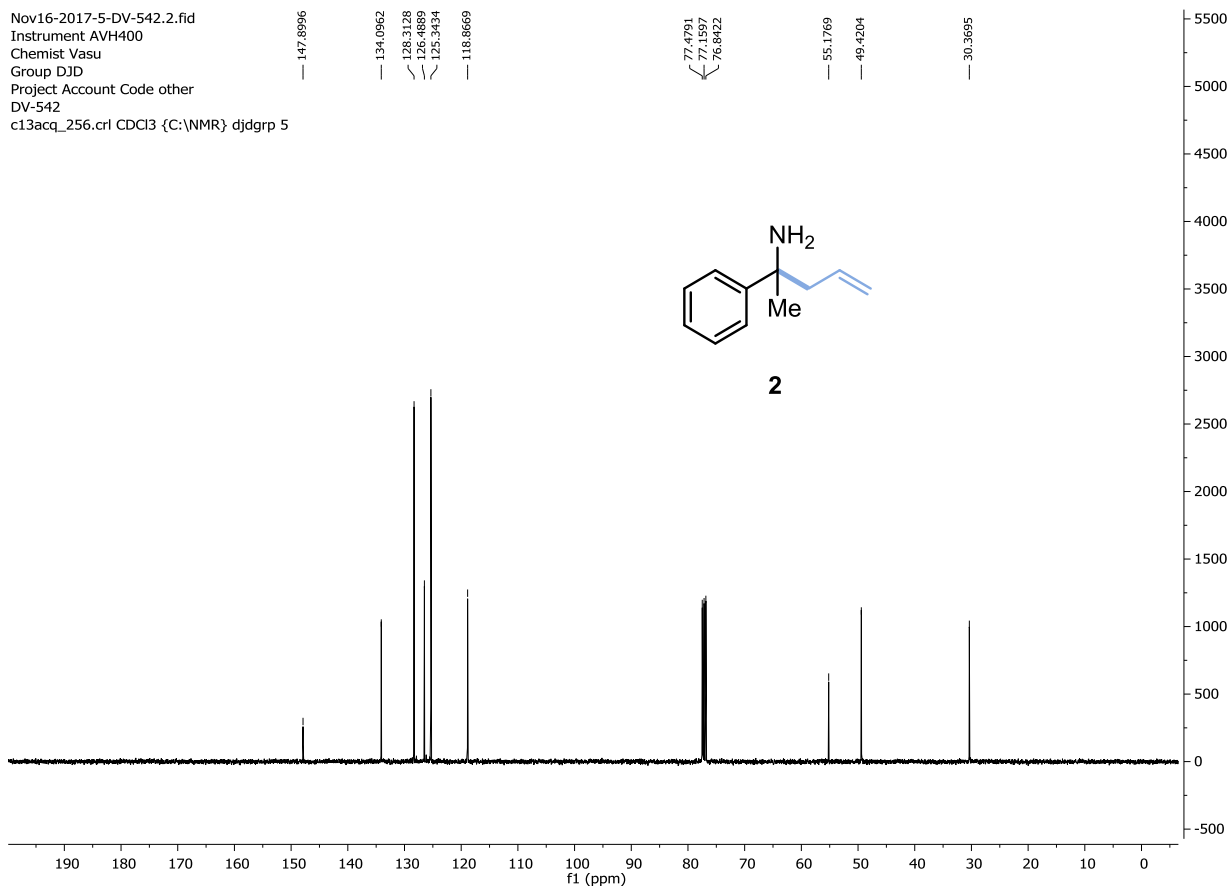

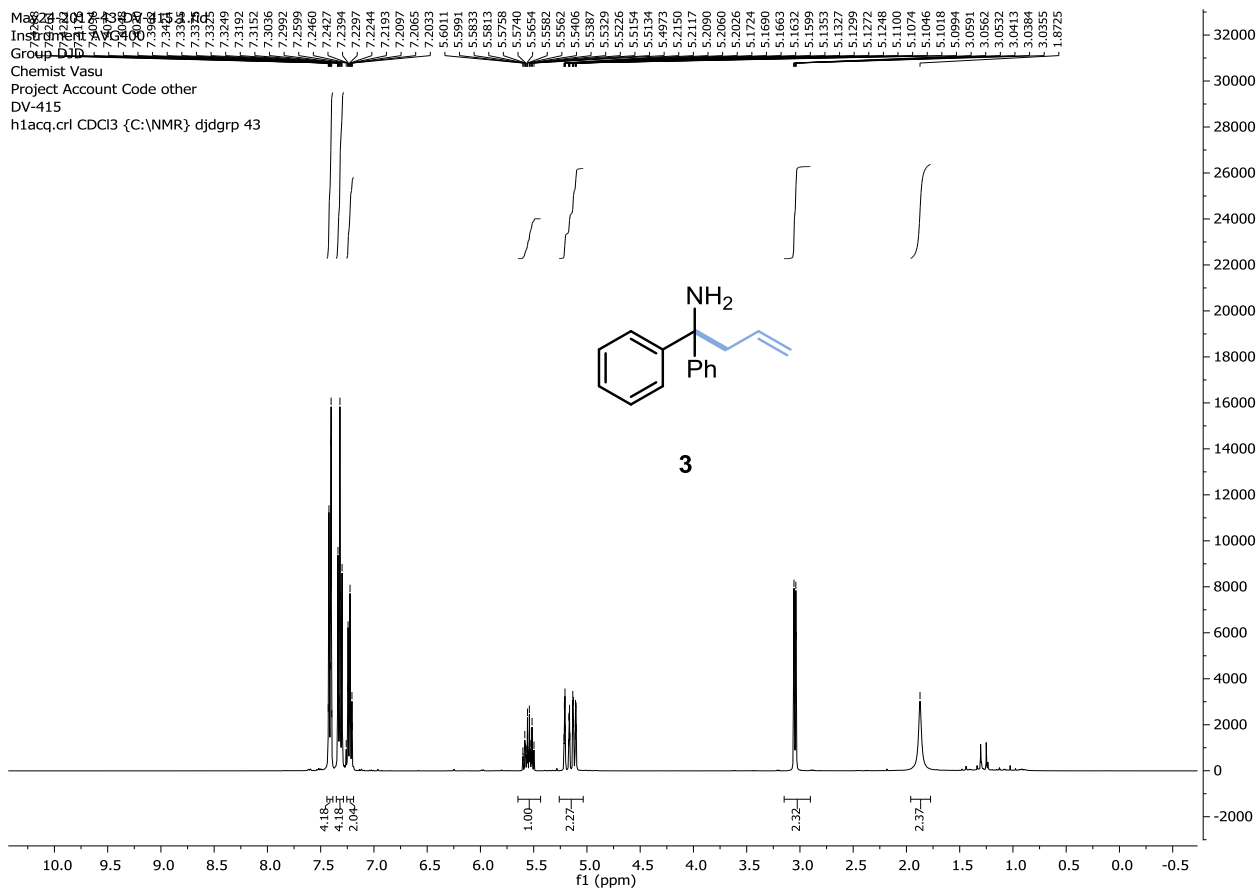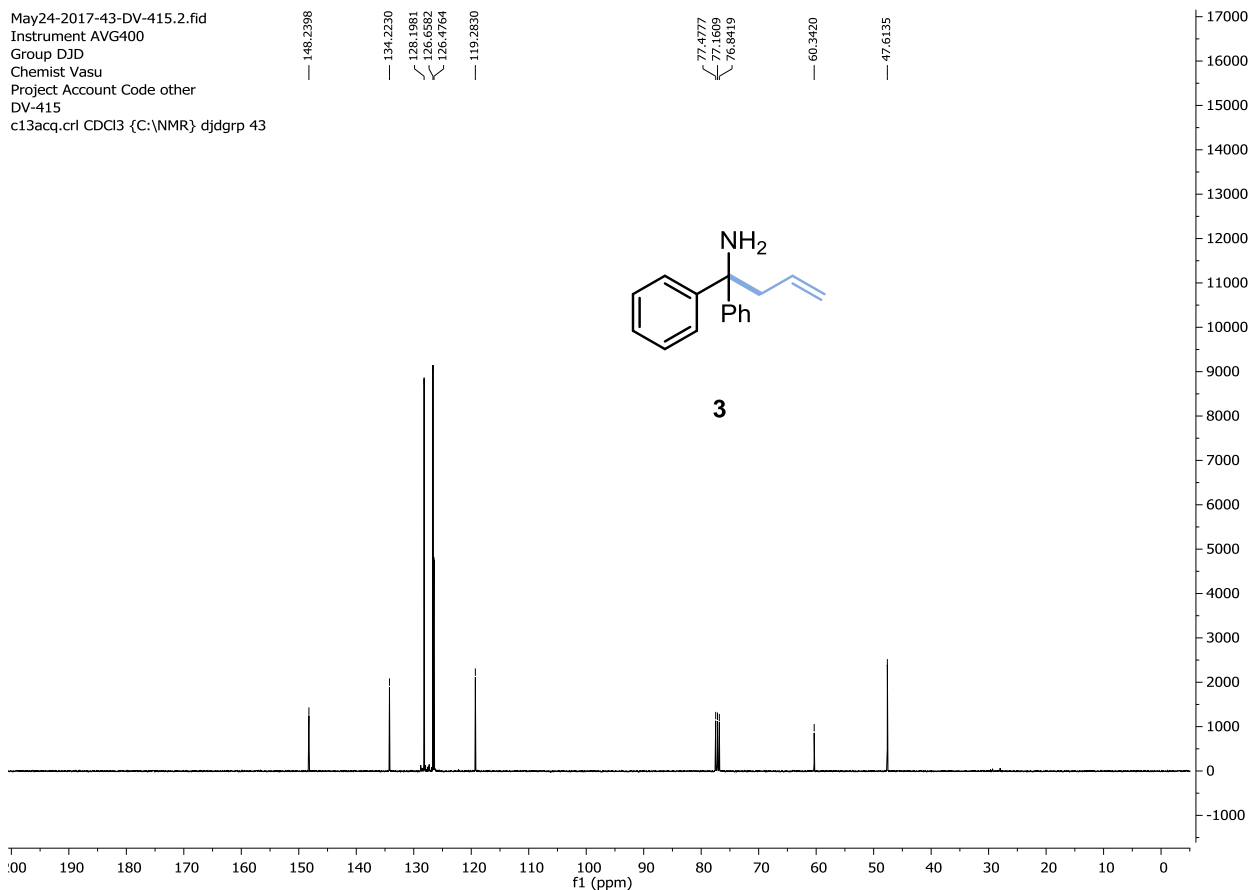

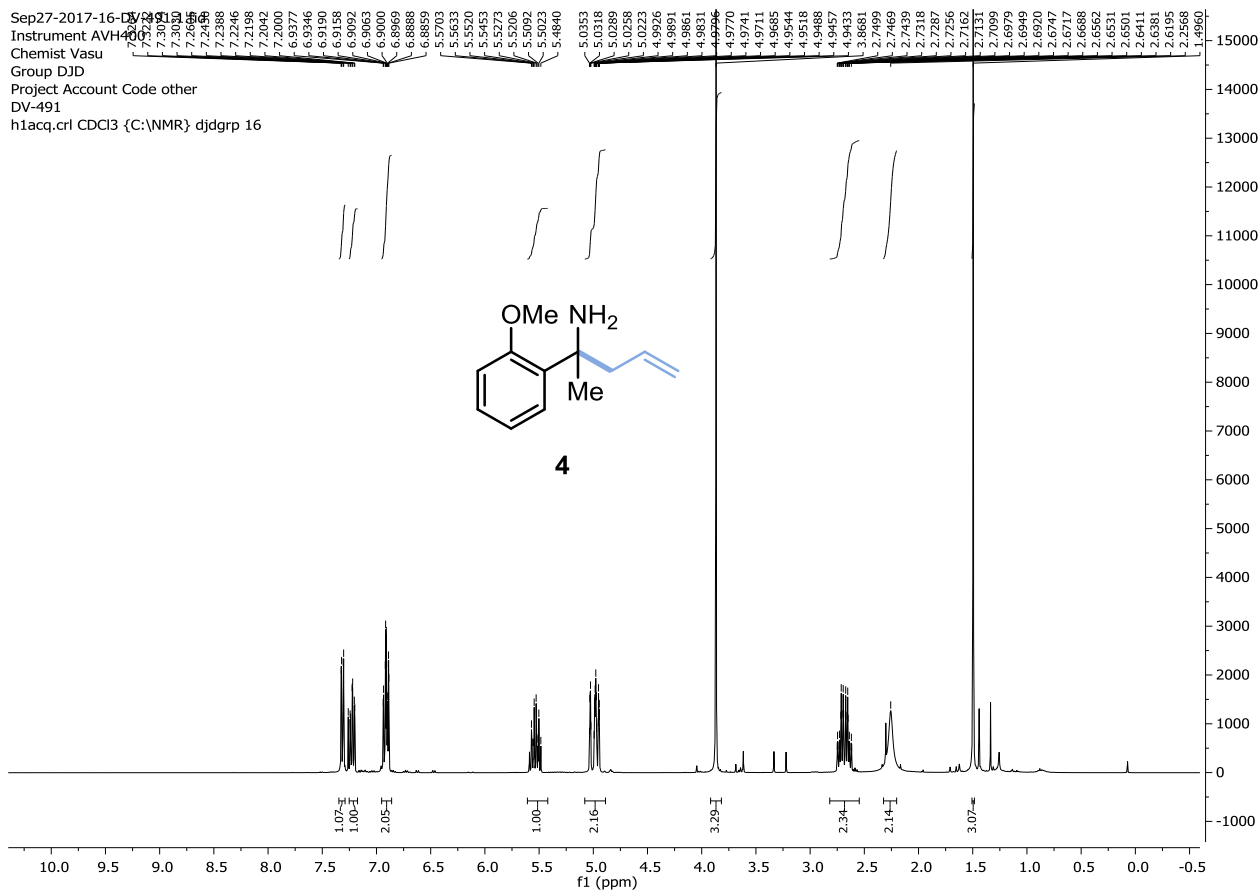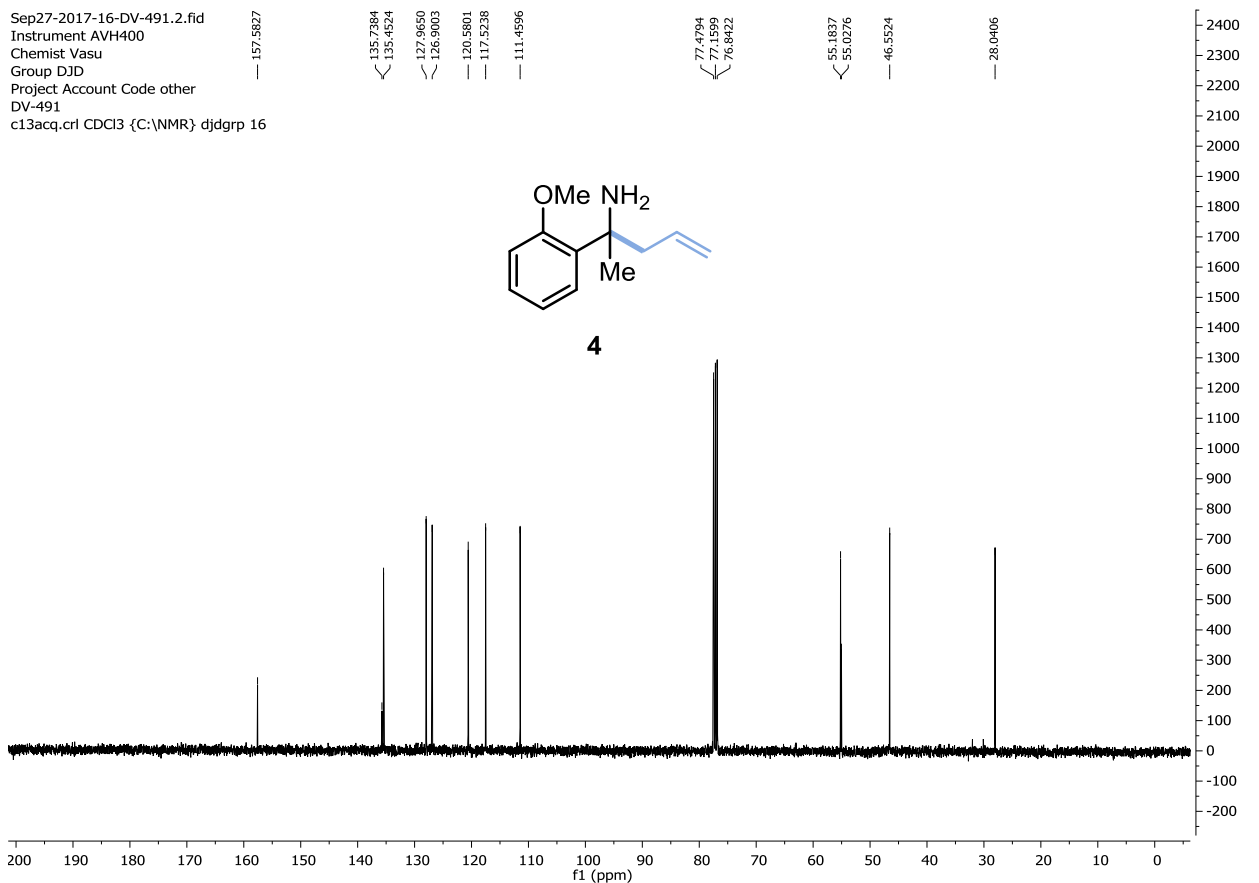

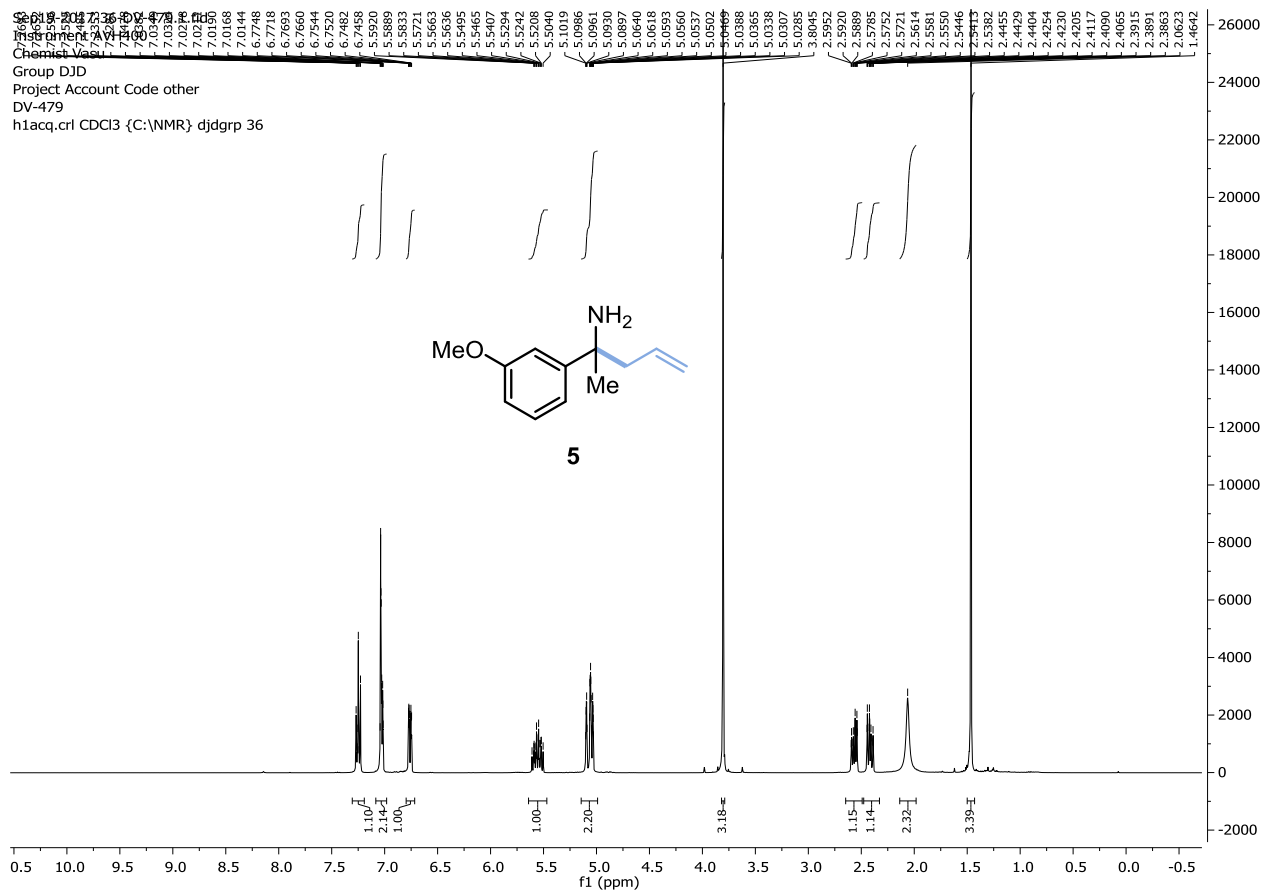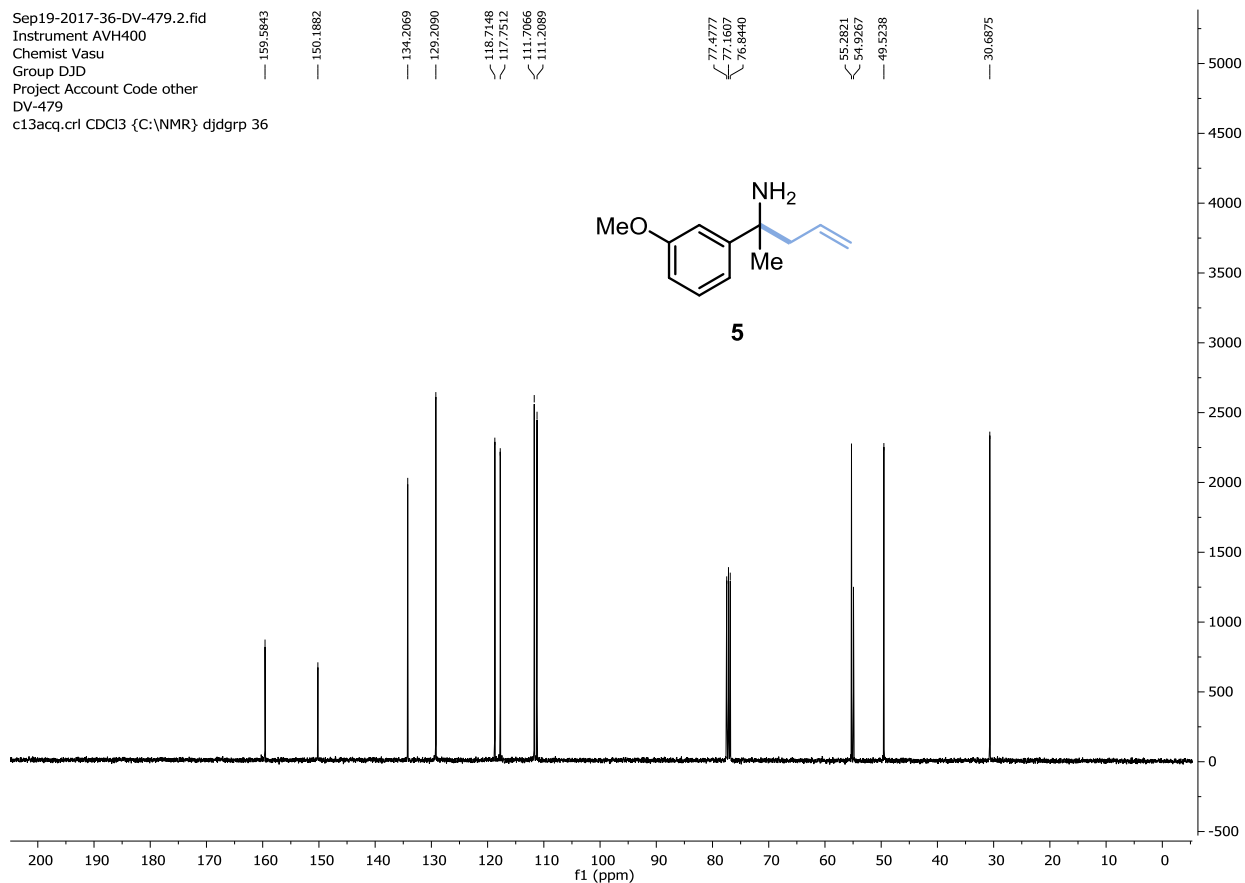

Nov30-2017-14-DV-459.1.fid  
 Instrument AVH400  
 Chemist Vasu  
 Group DJD  
 Project Account Code other  
 DV-459  
 h1acq.crl CDCl3 {C:\NMR} djgrp 14

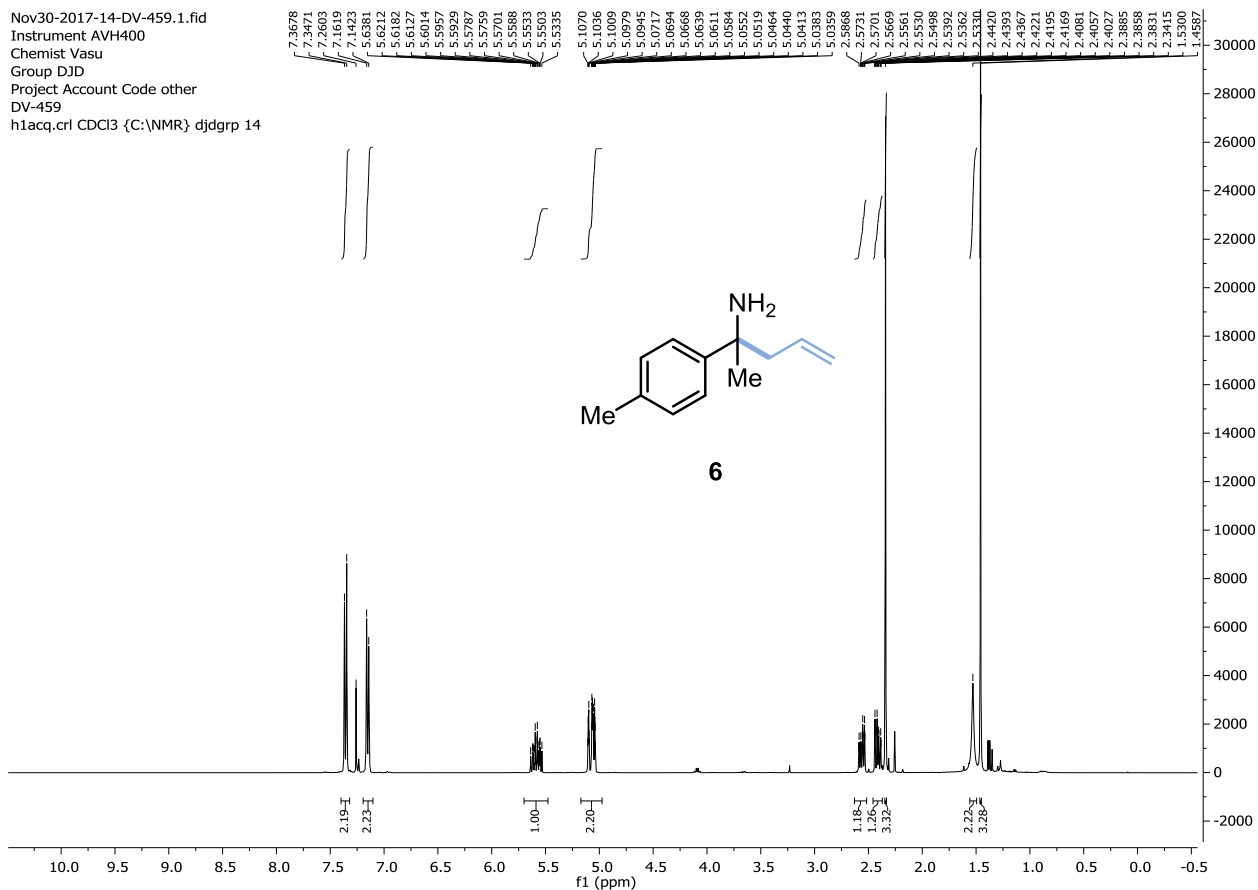

Nov30-2017-14-DV-459.2.fid  
 Instrument AVH400  
 Chemist Vasu  
 Group DJD  
 Project Account Code other  
 DV-459  
 c13acq\_512.crl CDCl3 {C:\NMR} djgrp 14

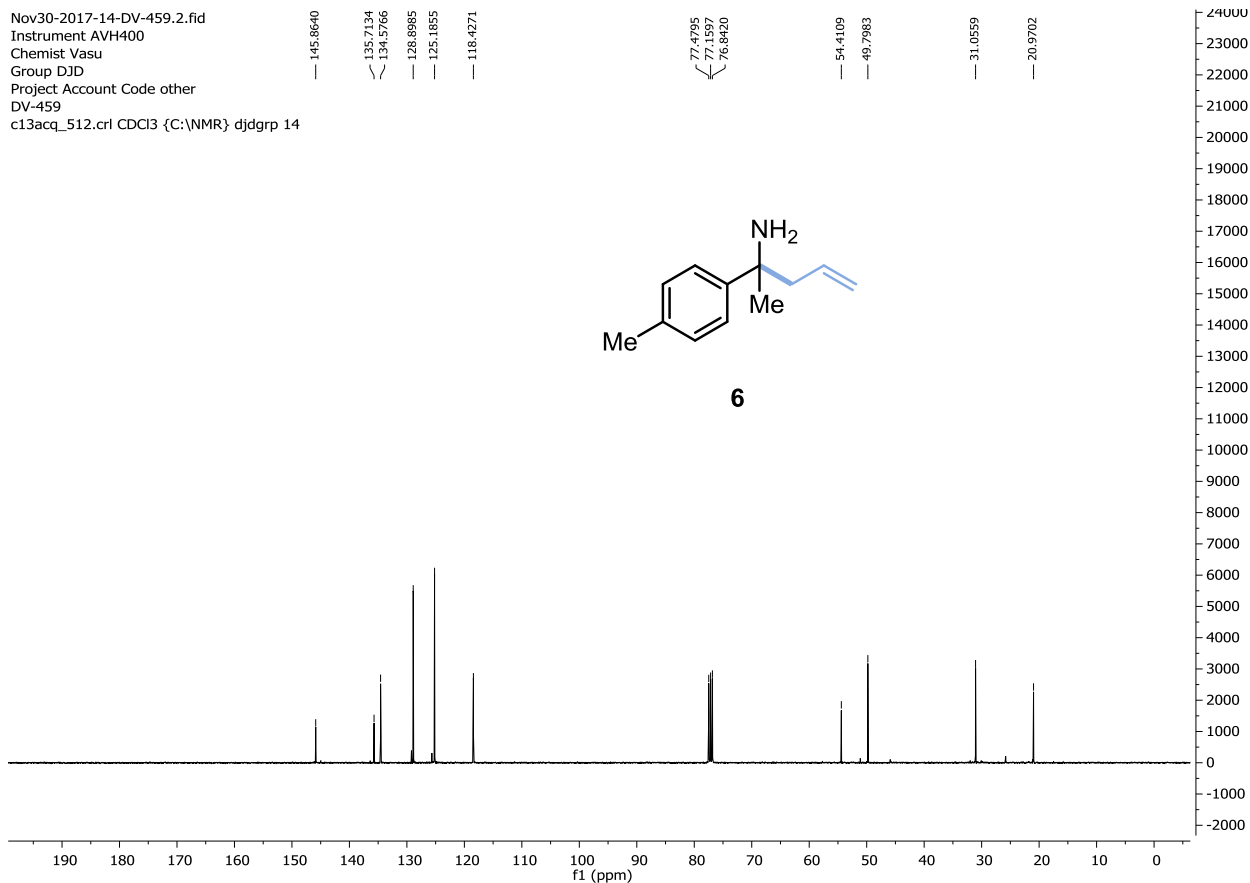

Oct13-2017-33-DV-482-HCl.1.fid  
 Instrument AVH400  
 Chemist Vasu  
 Group DJD  
 Project Account Code other  
 DV-482-HCl  
 h1acq.crl MeOD {C:\NMR} djgrp 33

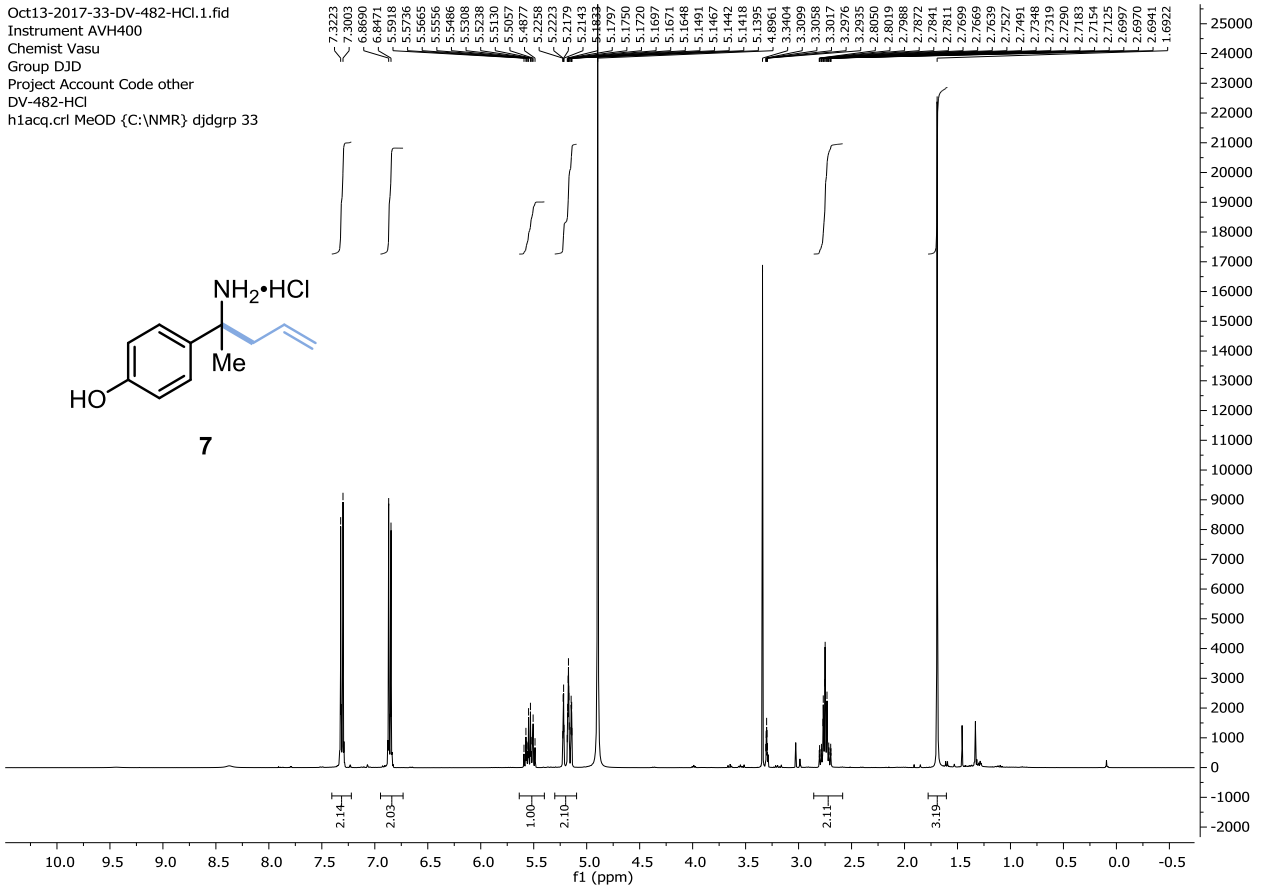

Oct13-2017-33-DV-482-HCl.2.fid  
 Instrument AVH400  
 Chemist Vasu  
 Group DJD  
 Project Account Code other  
 DV-482-HCl  
 c13acq.crl MeOD {C:\NMR} djgrp 33

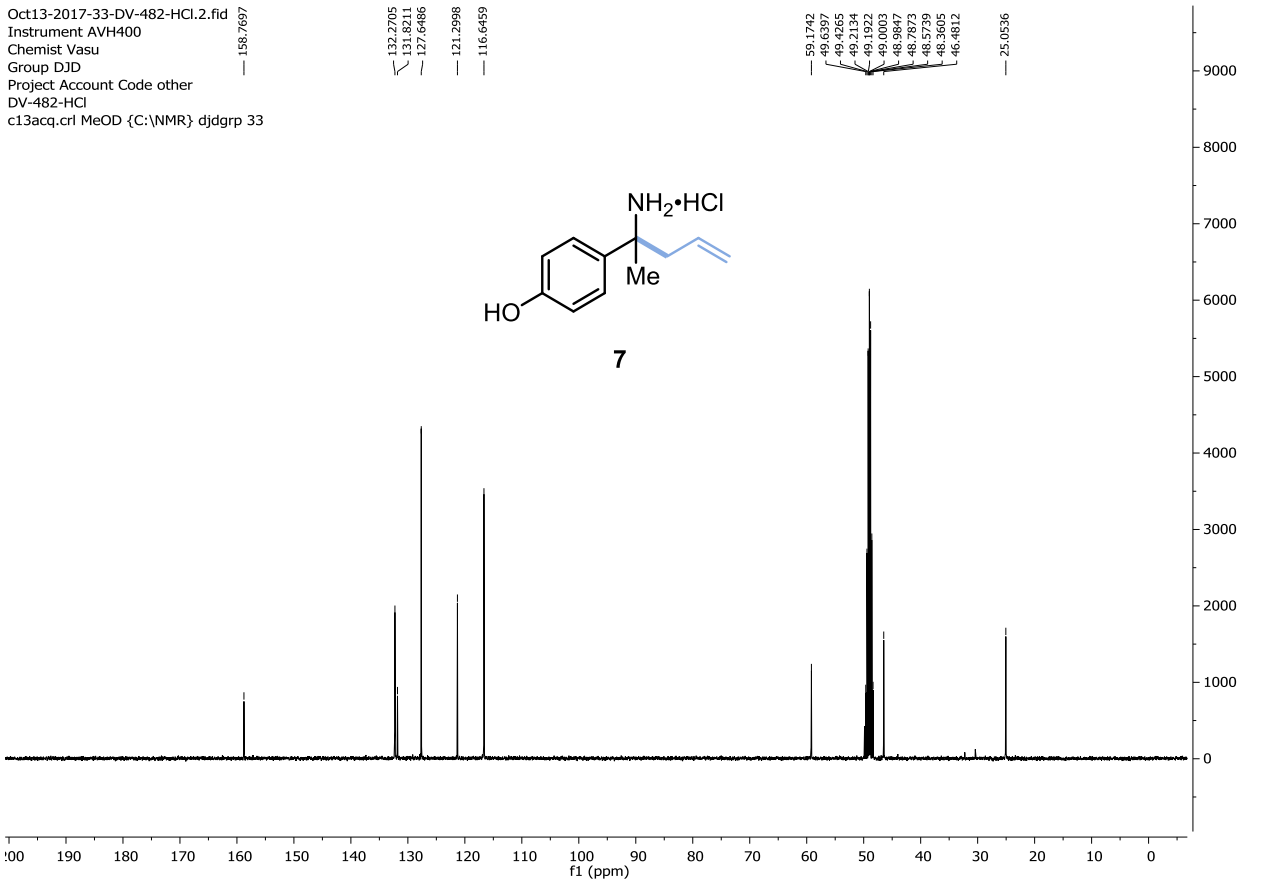



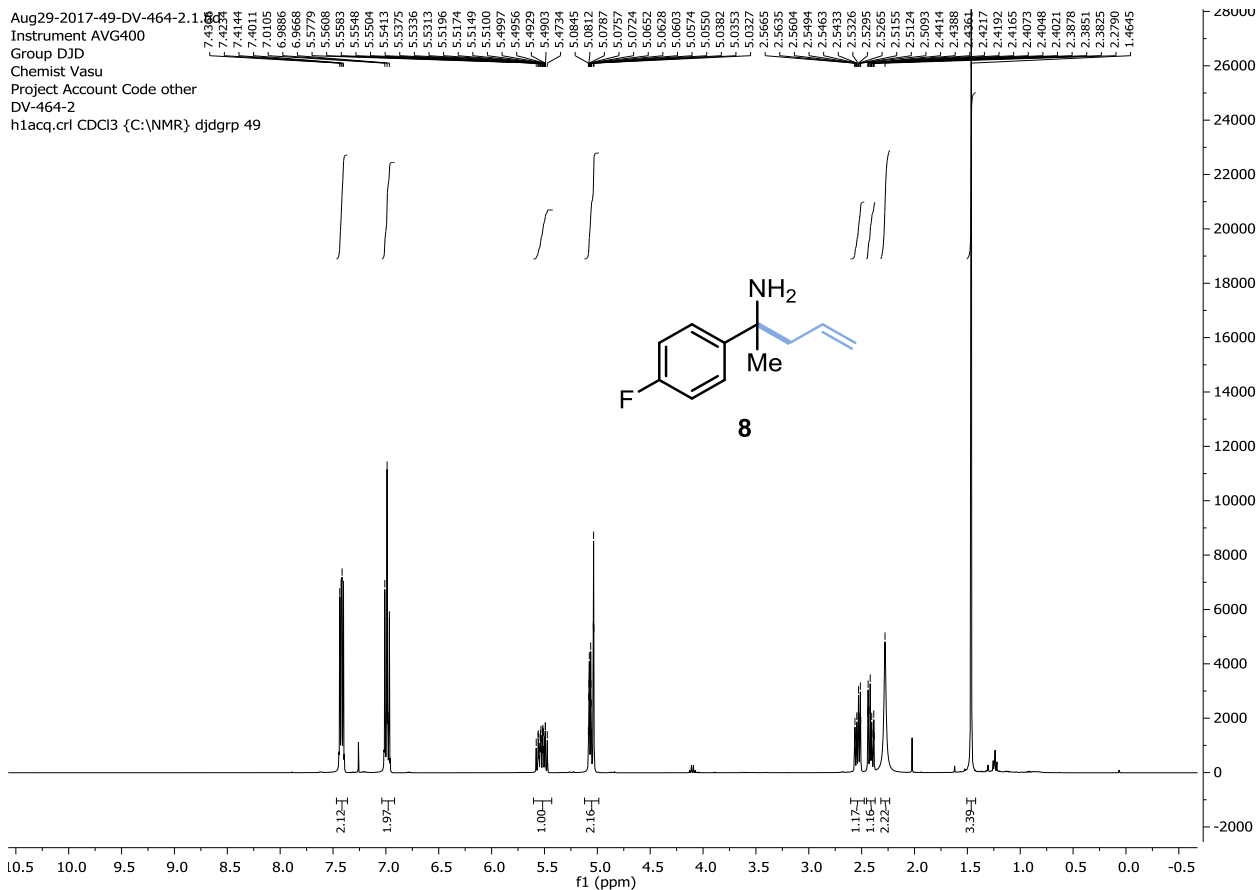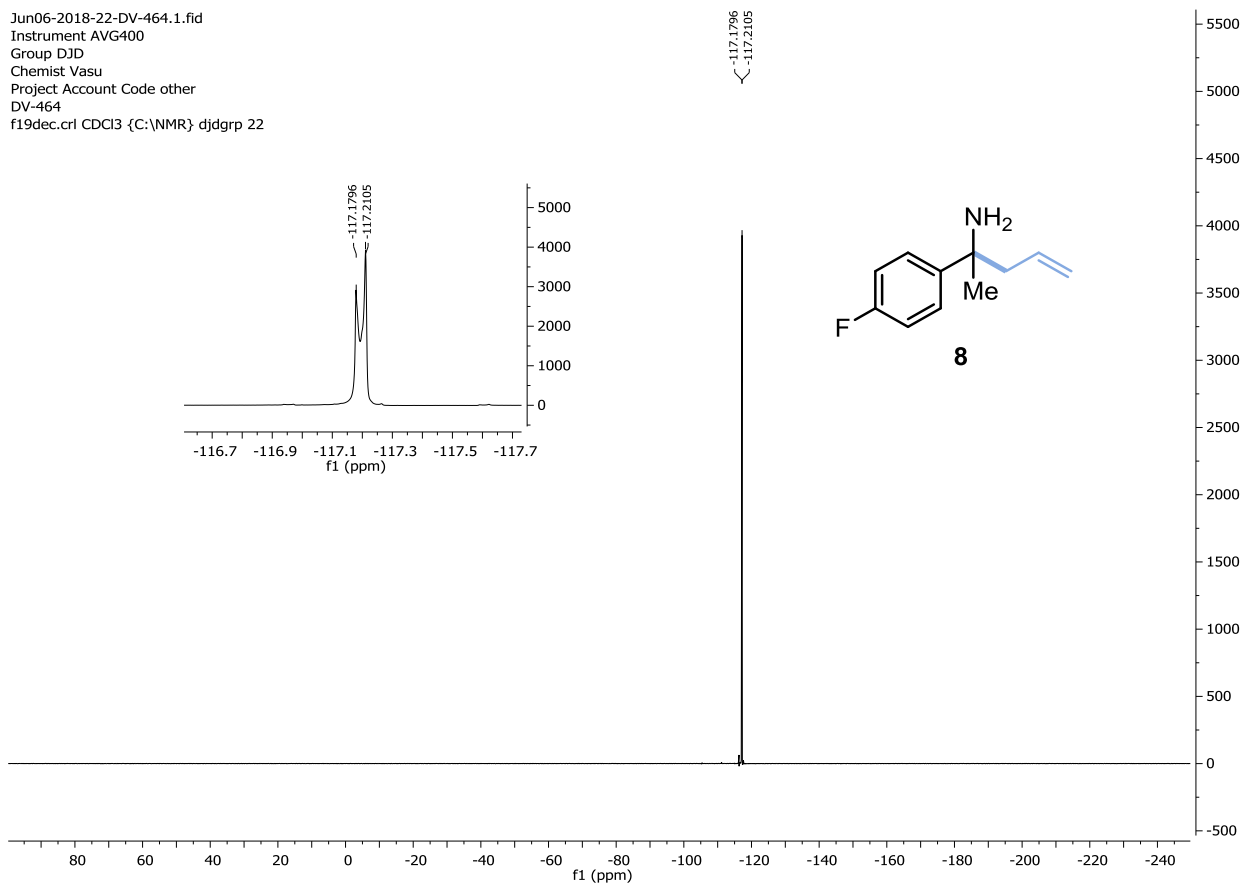

Aug29-2017-49-DV-464-2.2.fid  
Instrument AVG400  
Group DJD  
Chemist Vasu  
Project Account Code other  
DV-464-2  
c13acq.crl CDCl3 {C:\NMR} djgrp 49

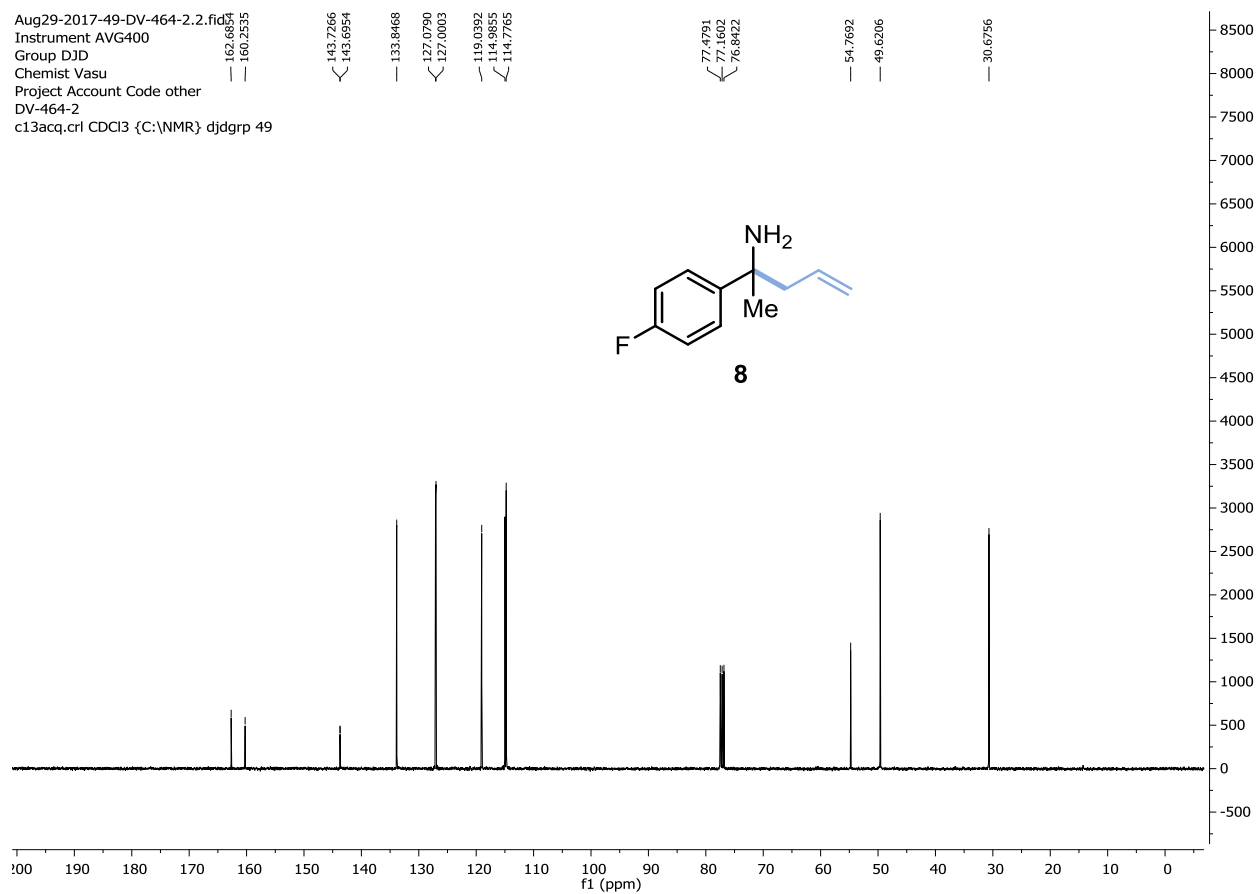

Aug29-2017-37-DV-465-1.1.fid  
 Instrument AVH400  
 Chemist Vasu  
 Group DJD  
 Project Account Code other  
 DV-465-1  
 h1acq.crl CDCl3 {C:\NMR} djdgrp 37

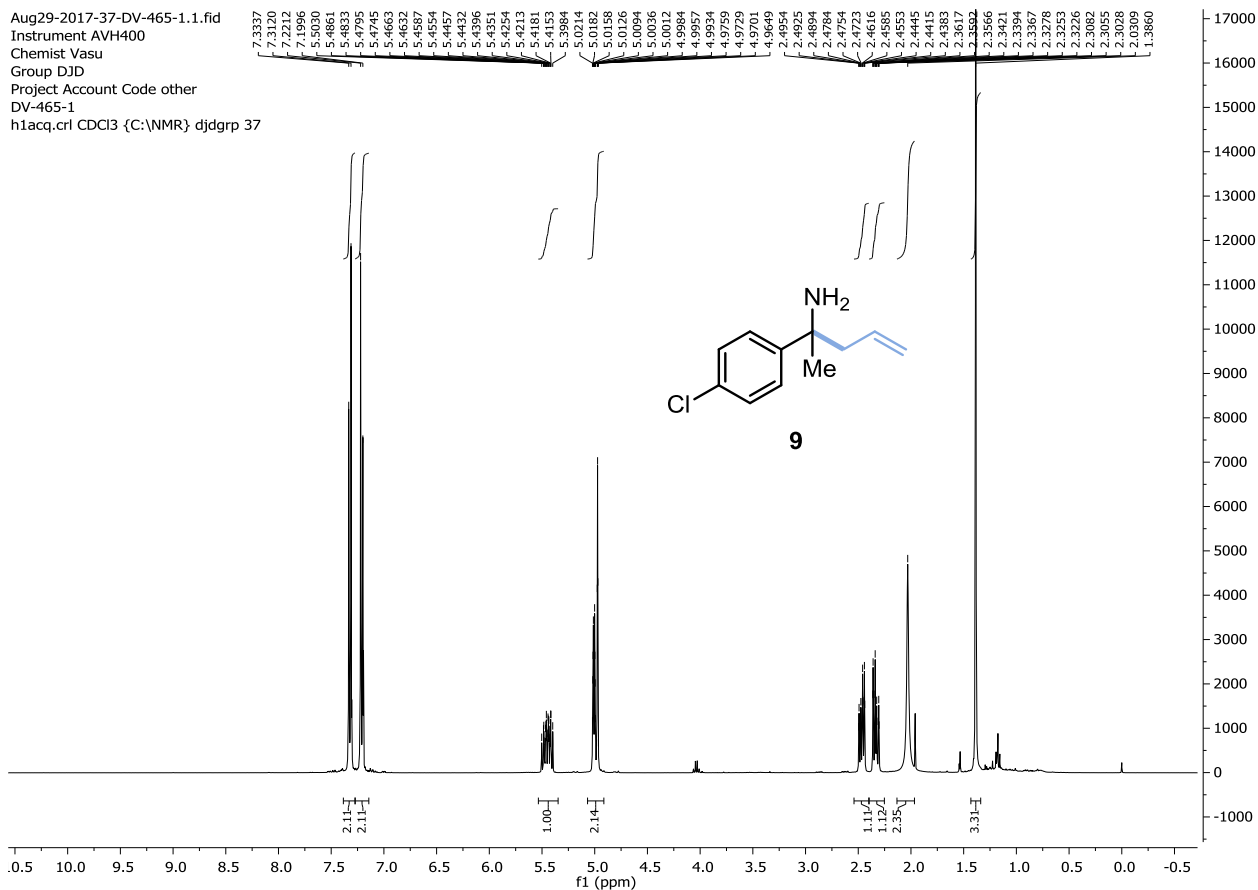

Aug29-2017-37-DV-465-1.2.fid  
 Instrument AVH400  
 Chemist Vasu  
 Group DJD  
 Project Account Code other  
 DV-465-1  
 c13acq.crl CDCl3 {C:\NMR} djdgrp 37

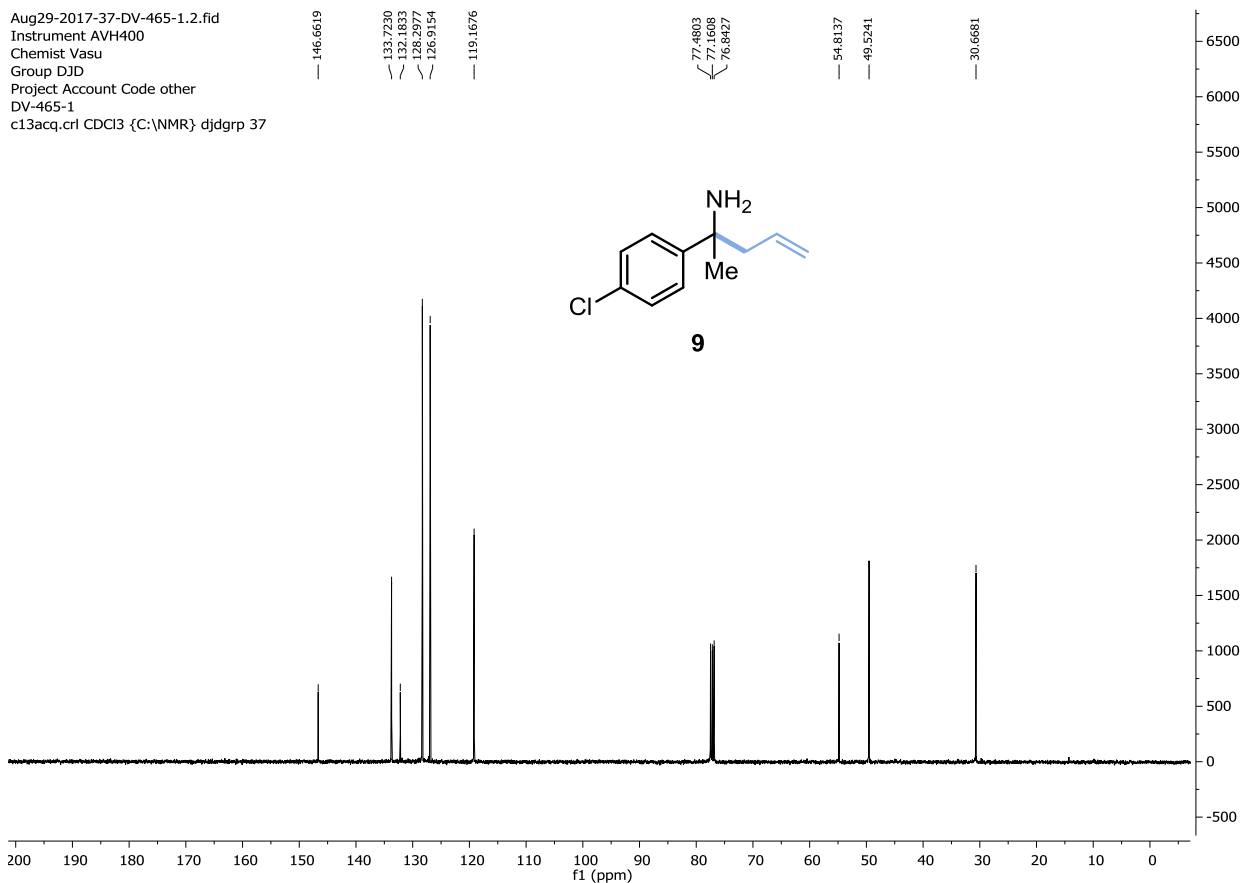

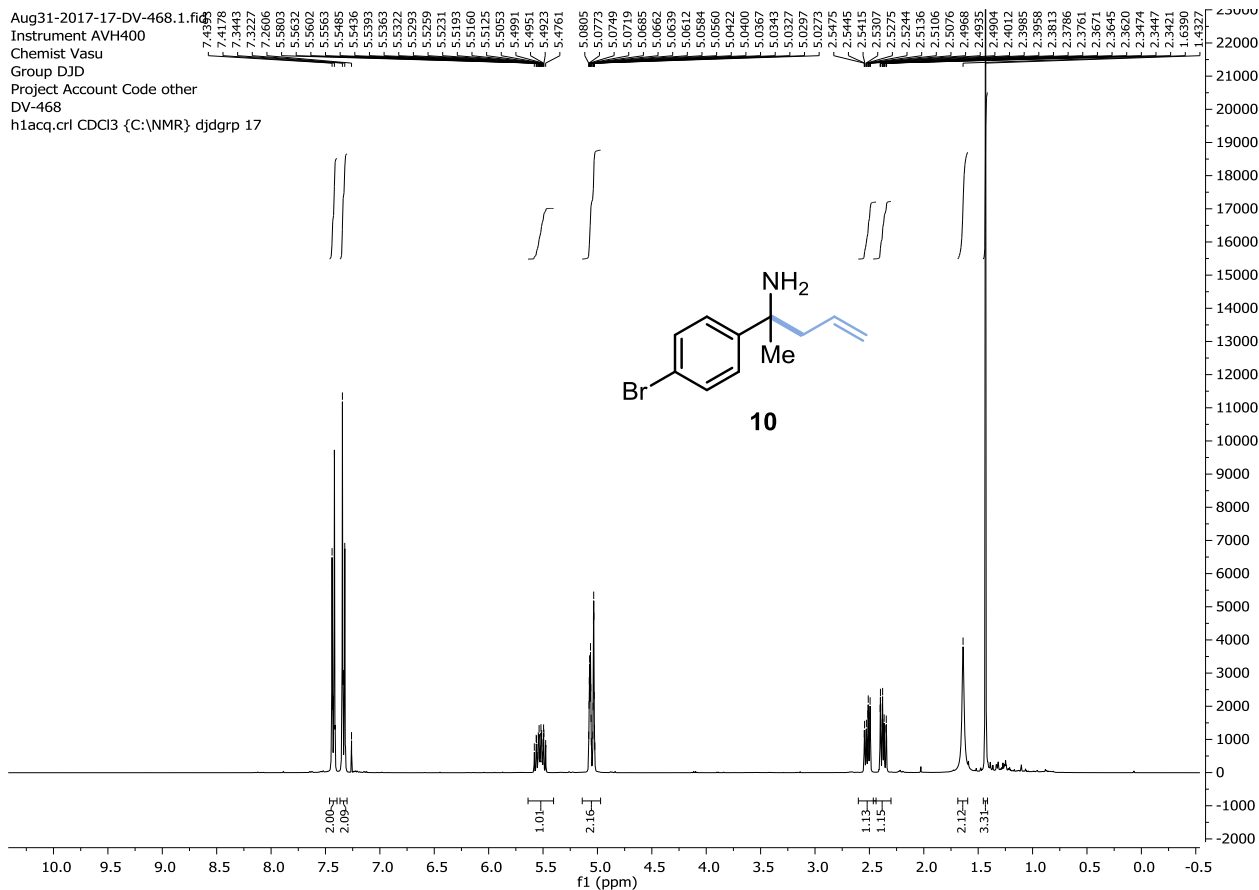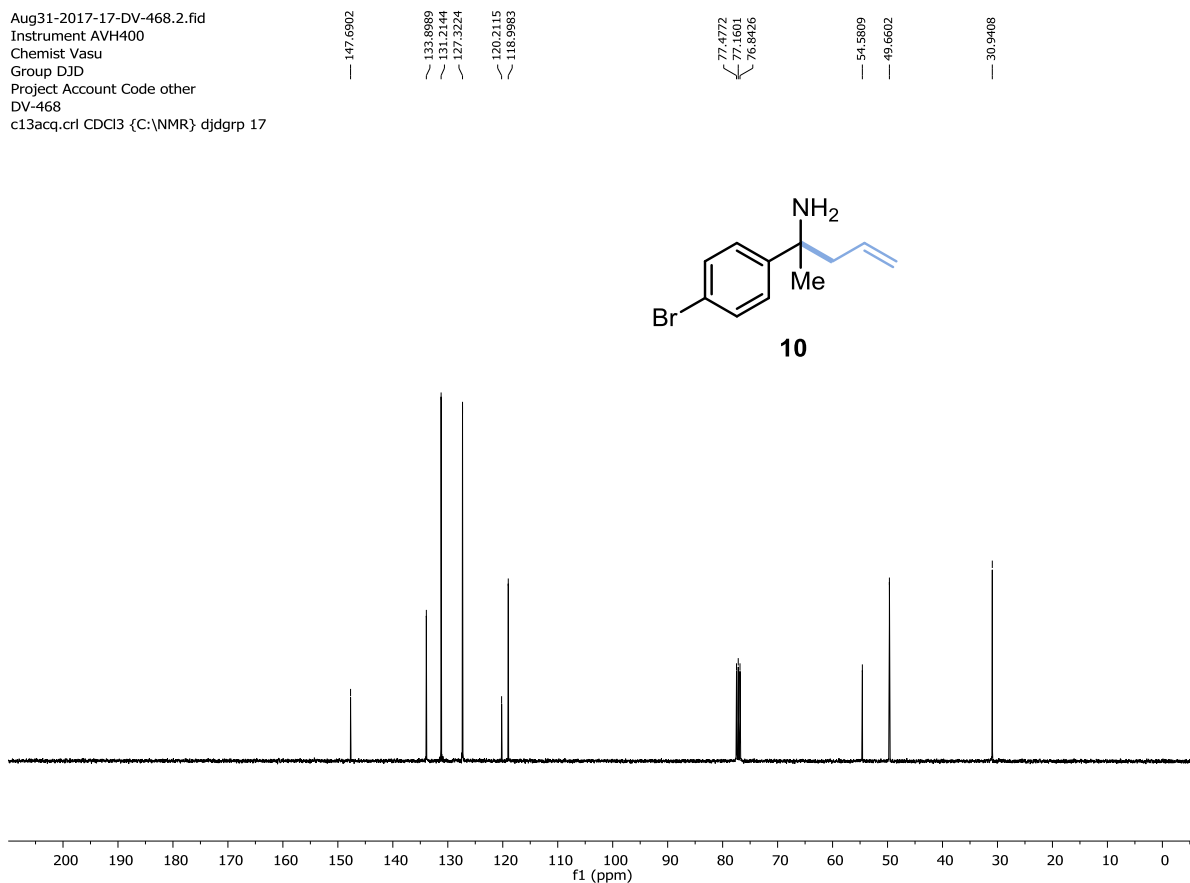

Sep01-2017-1-DV-467.1.fid  
 Instrument AVH400  
 Chemist Vasu  
 Group DJD  
 Project Account Code other  
 DV-467  
 h1acq.crl CDCl3 {C:\NMR} djgrp 1

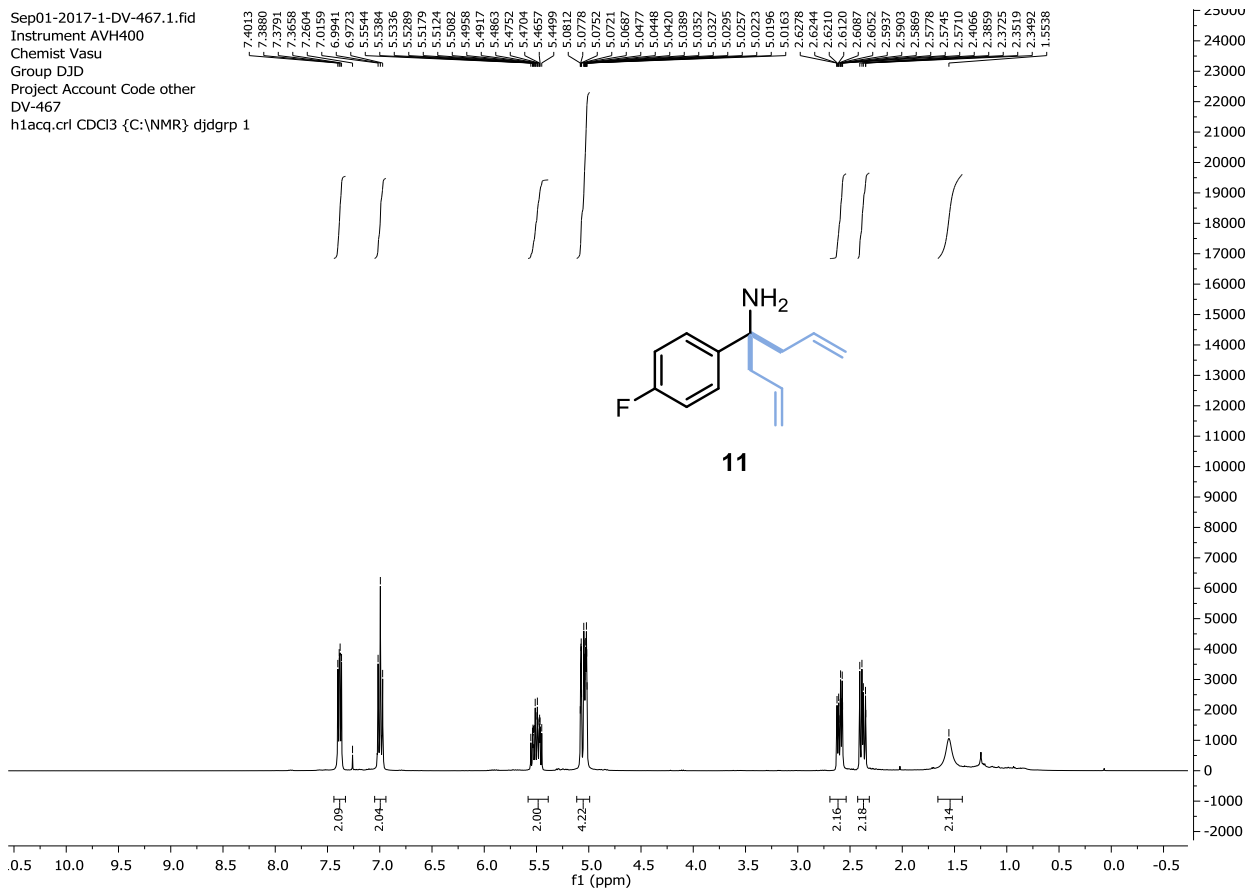

Jun06-2018-19-DV-467.1.fid  
 Instrument AVG400  
 Group DJD  
 Chemist Vasu  
 Project Account Code other  
 DV-467  
 f19dec.crl CDCl3 {C:\NMR} djgrp 19

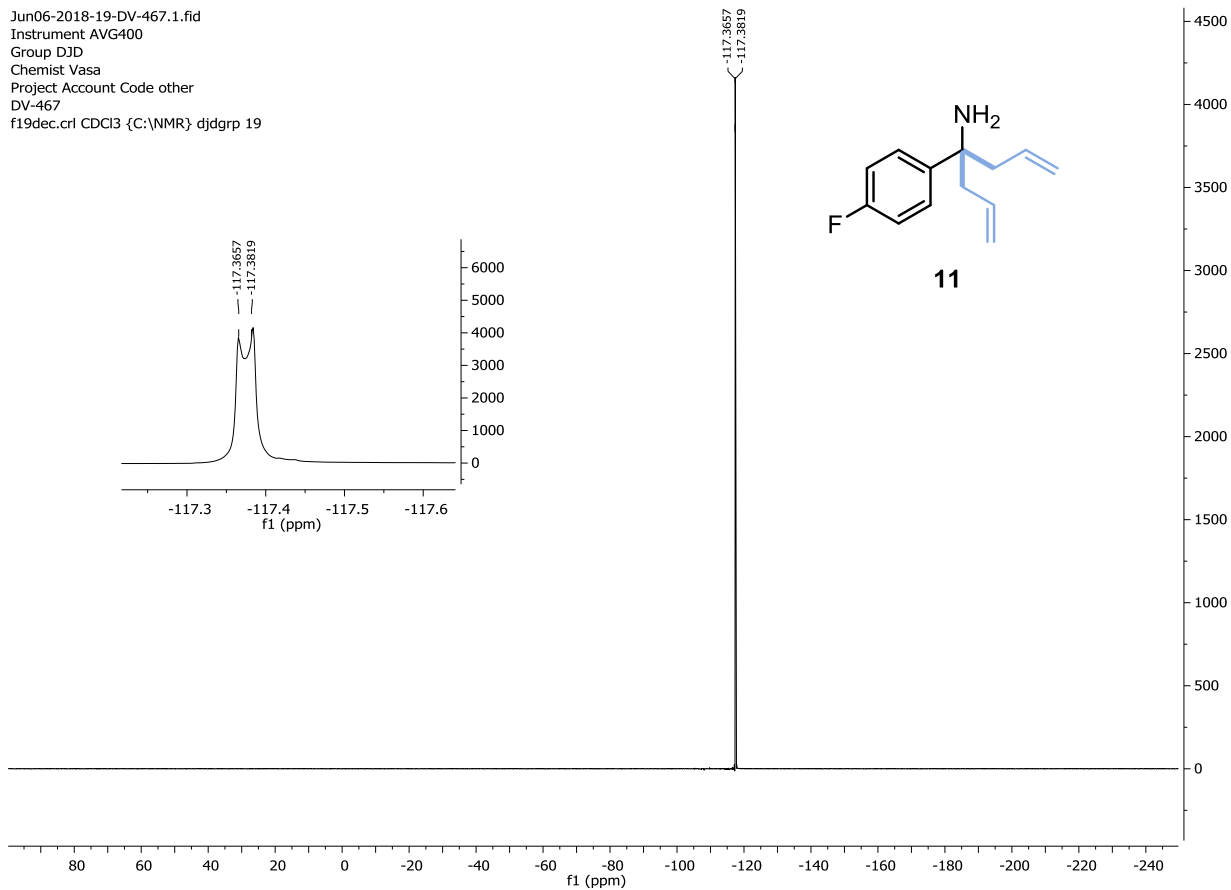

Sep01-2017-1-DV-467.2.fid  
Instrument AVH400  
Chemist Vasu  
Group DJD  
Project Account Code other  
DV-467  
c13acq.crl CDCl3 {C:\NMR} djmgrp 1

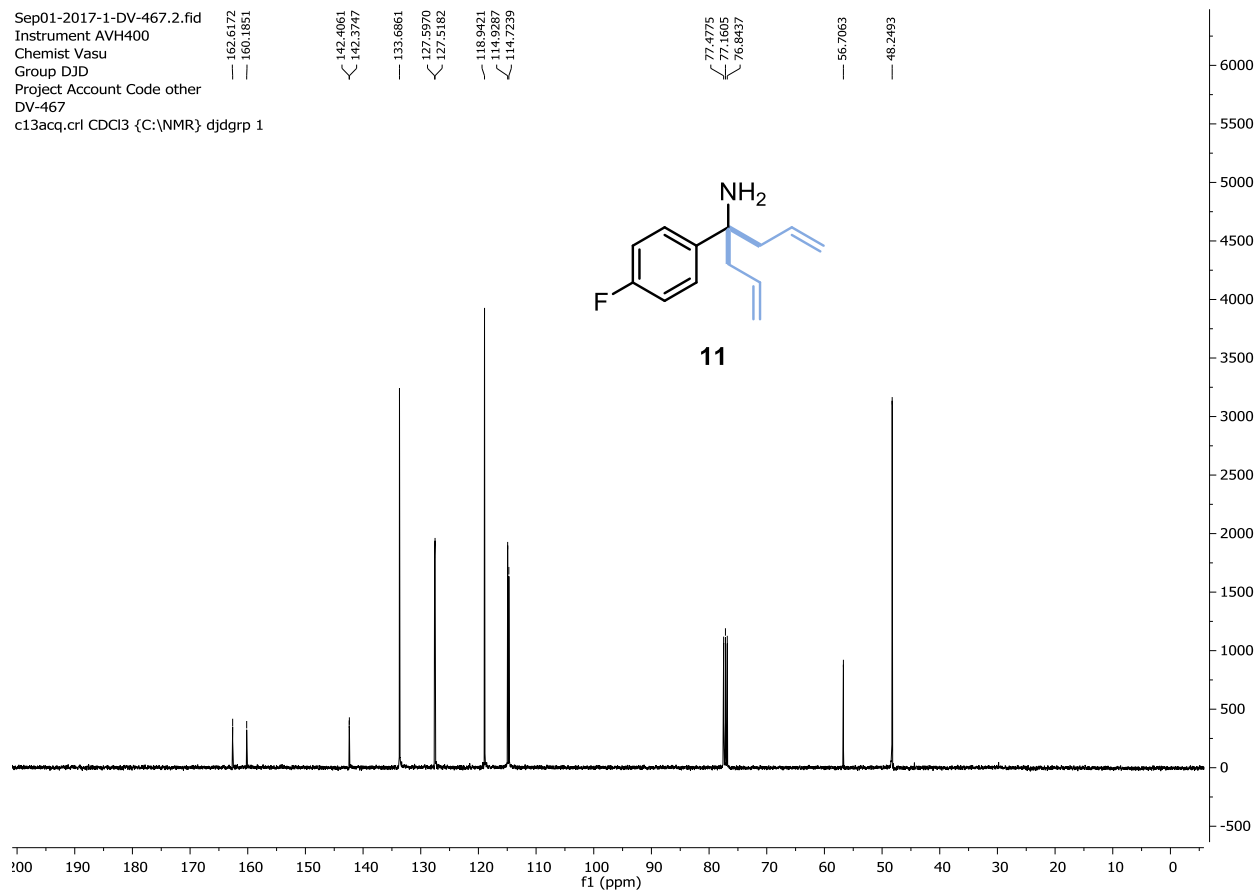

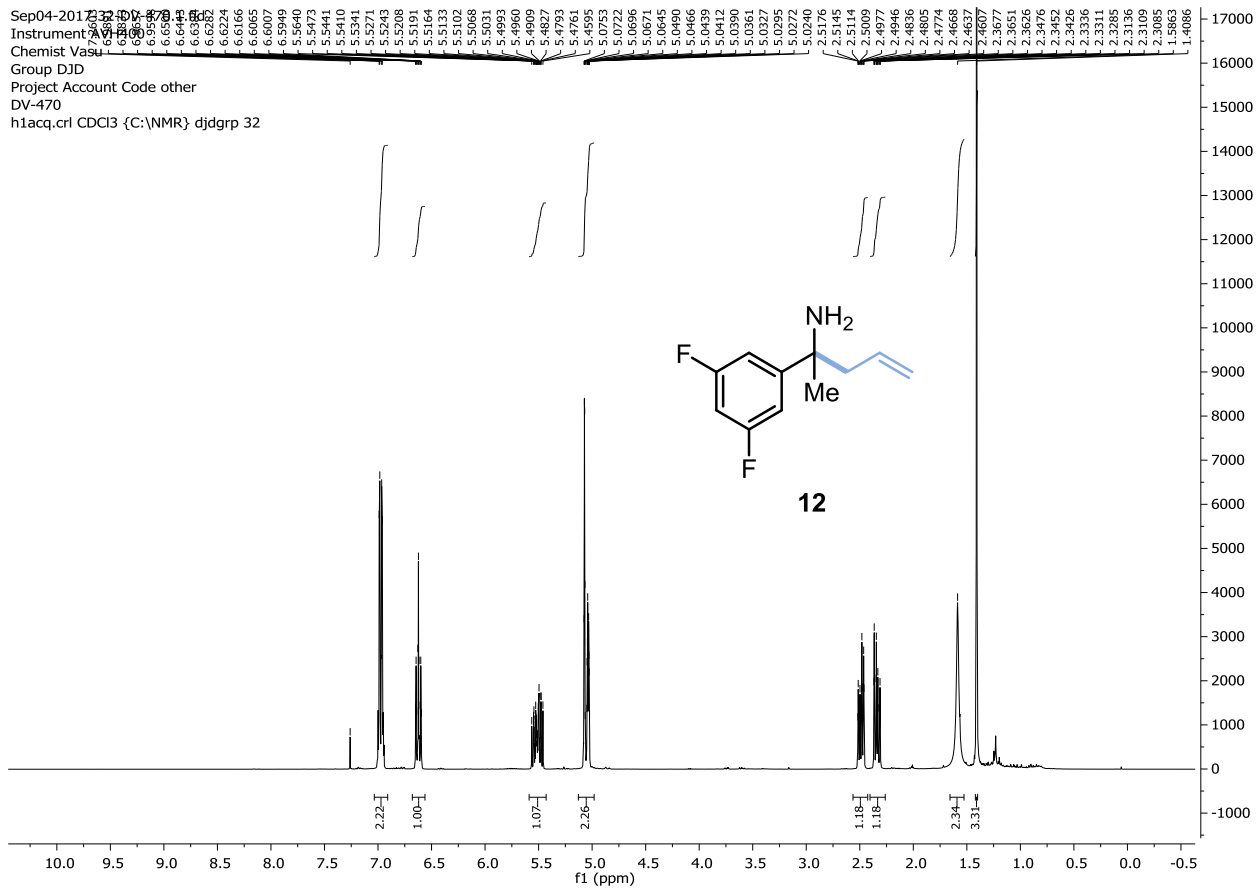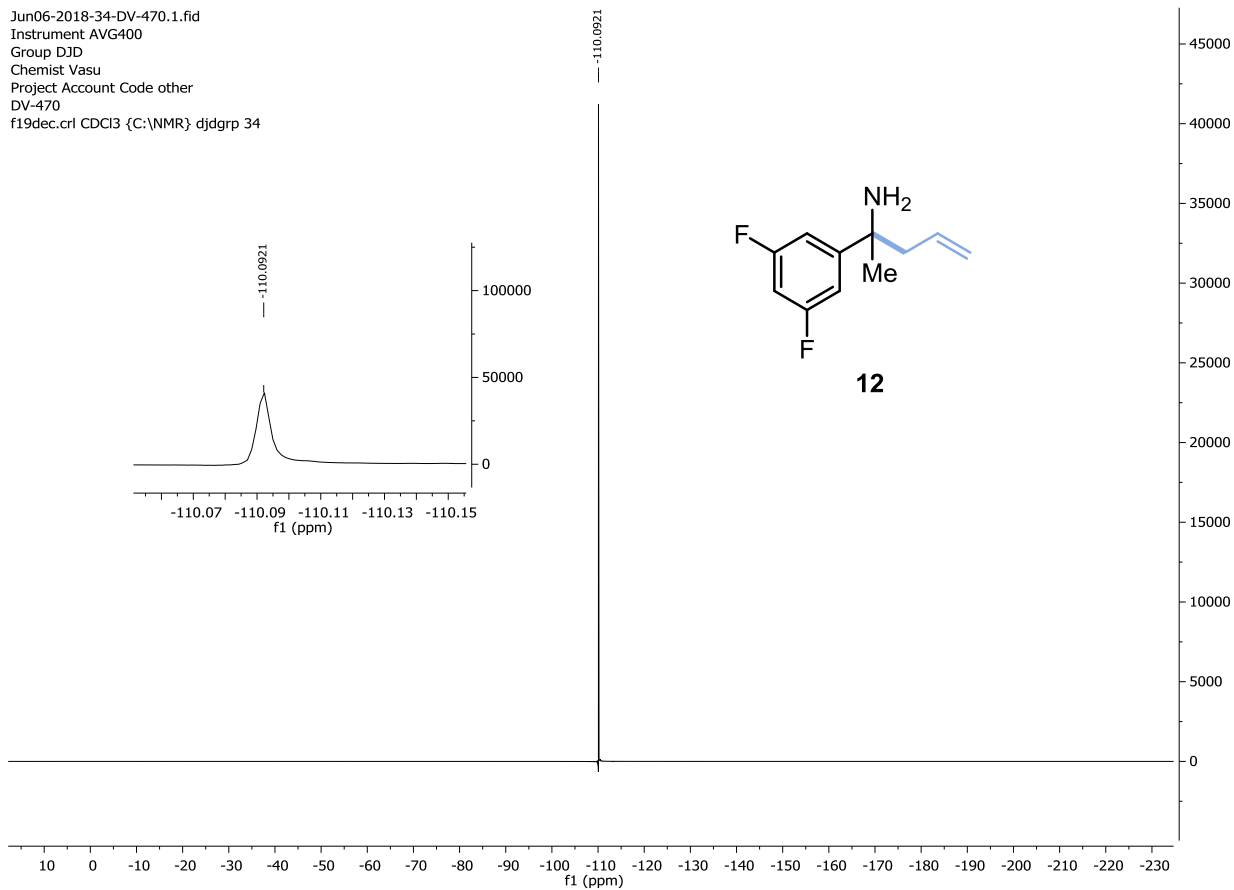

Sep04-2017-32-DV-470.2.f10  
Instrument AVH400  
Chemist Vasu  
Group DJD  
Project Account Code other  
DV-470  
c13acq.crf CDCl3 {C:\NMR} djgrp 32

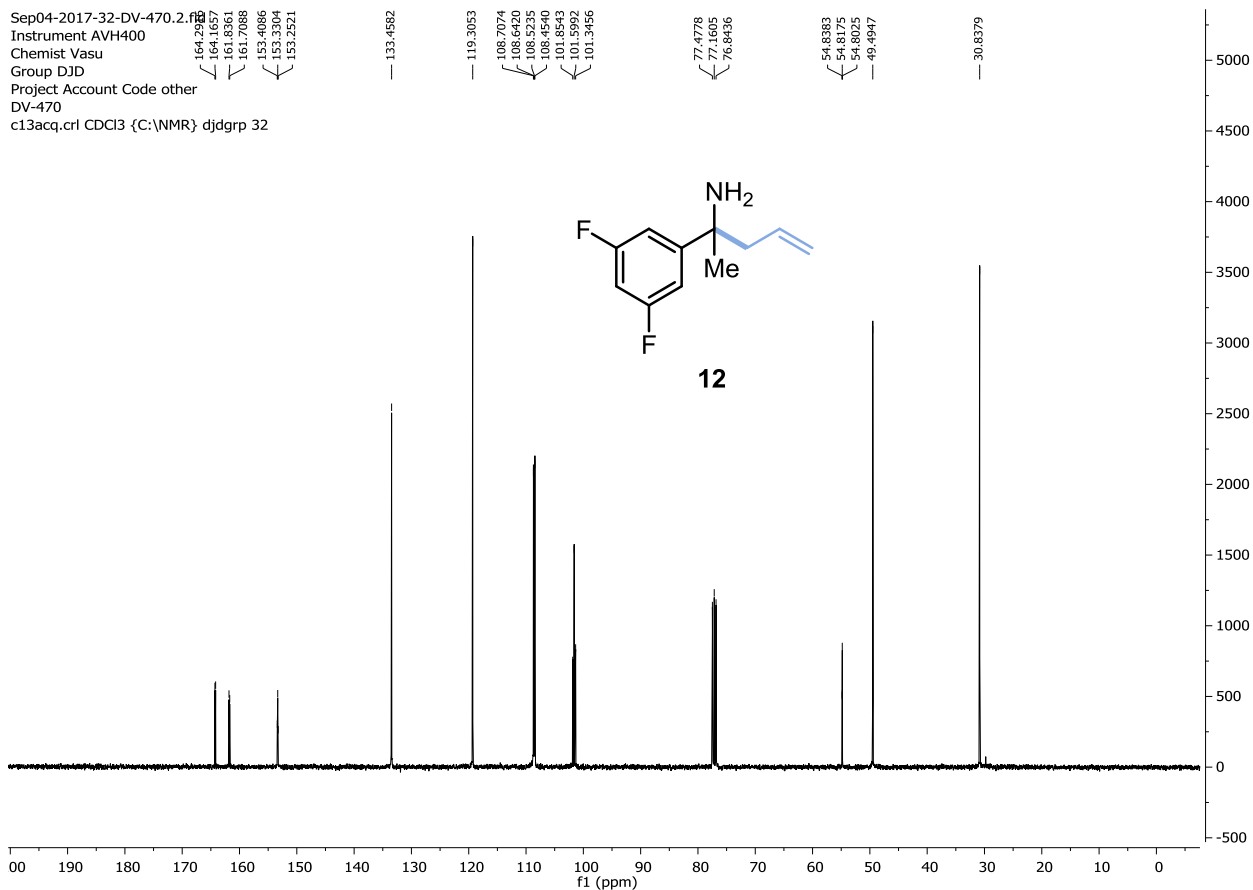



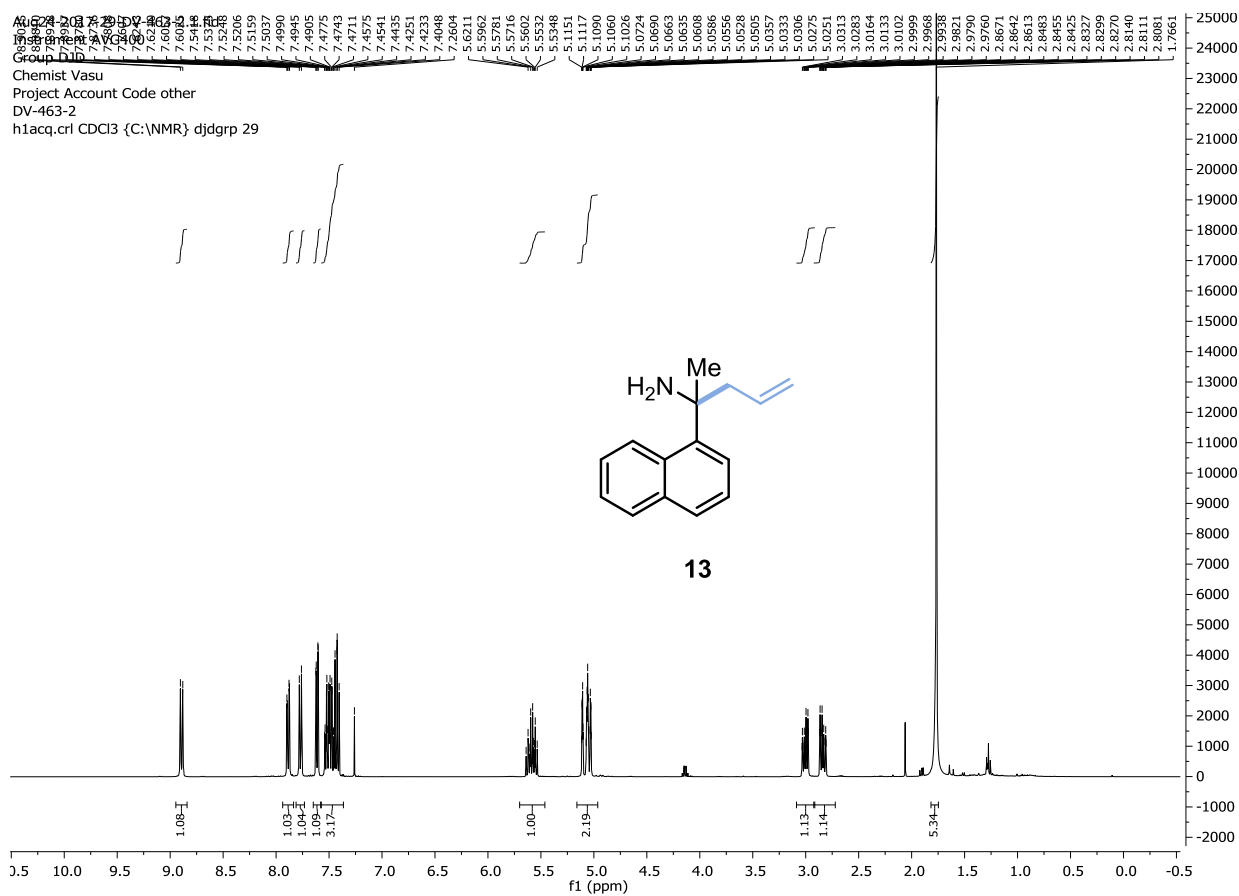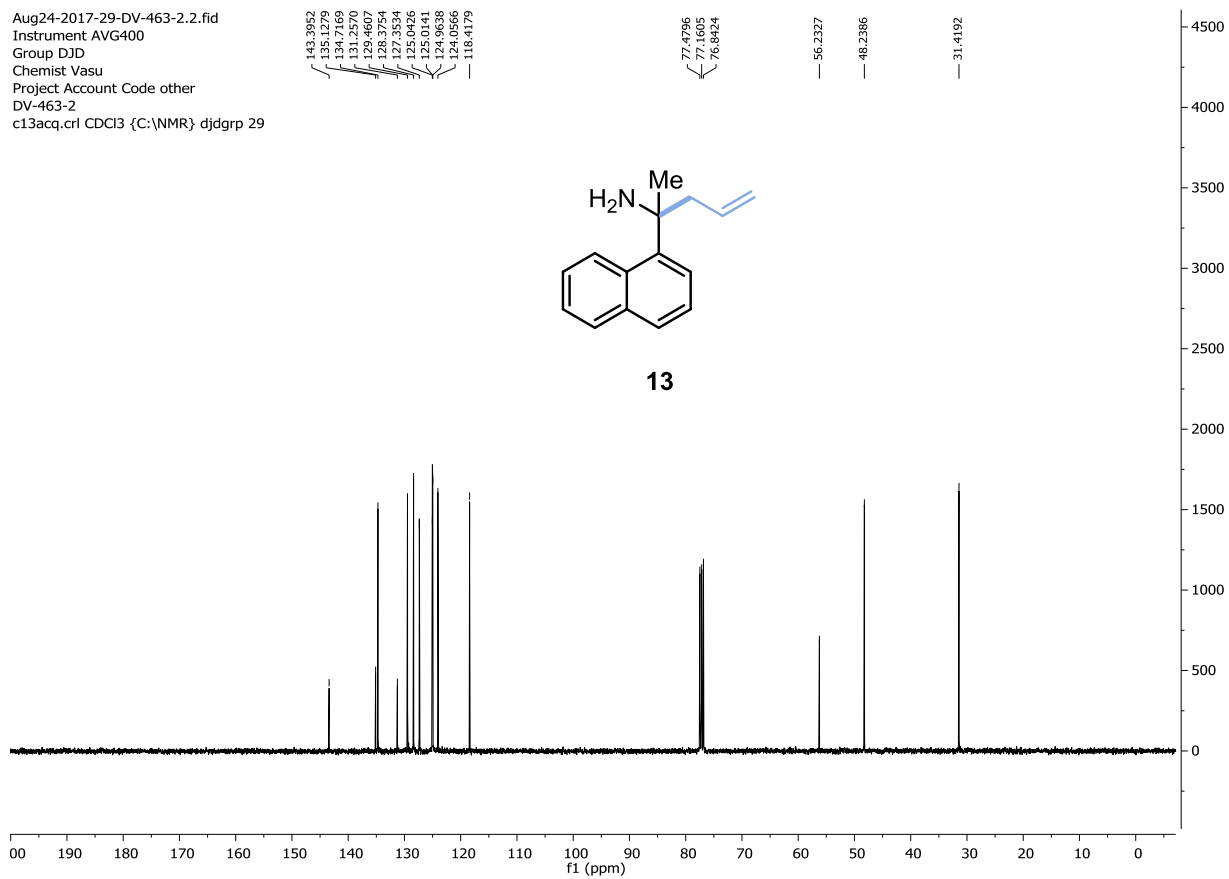

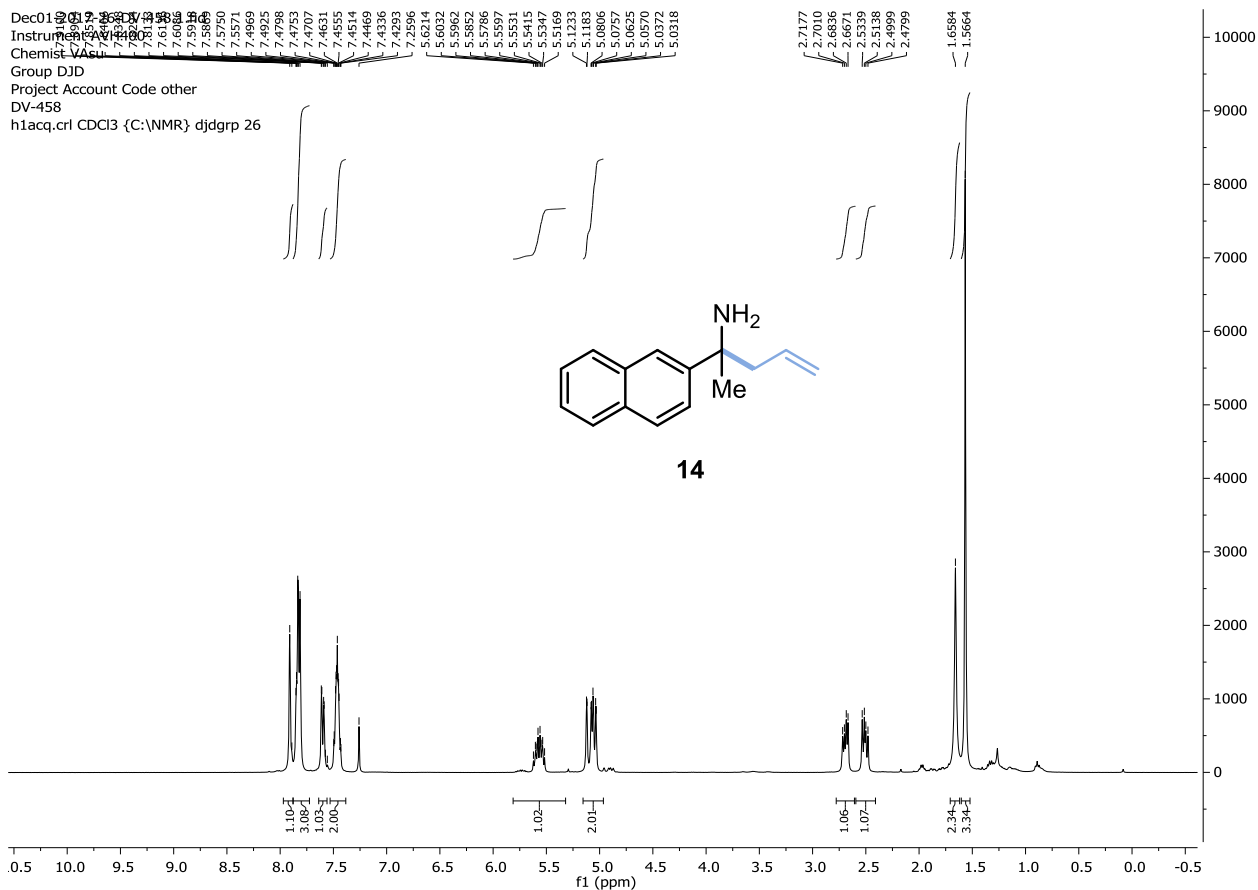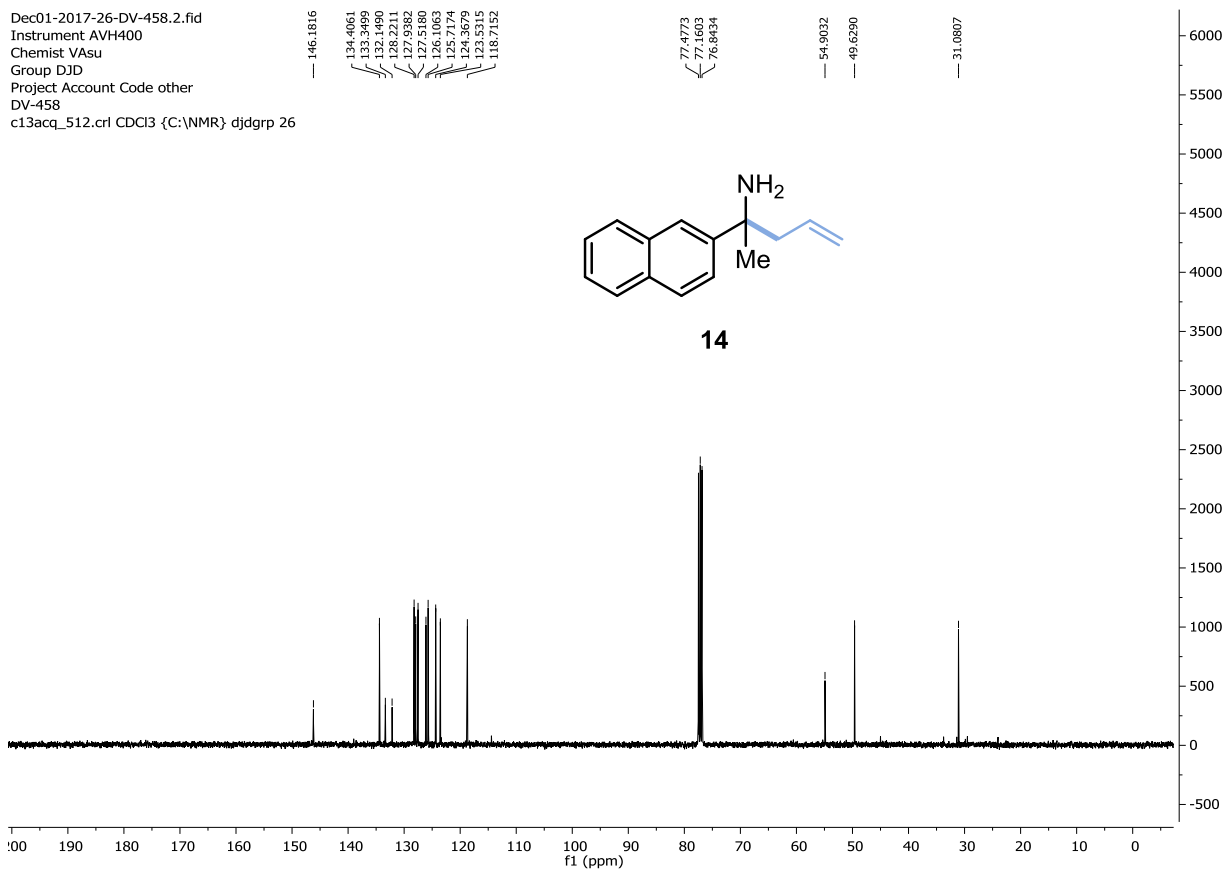

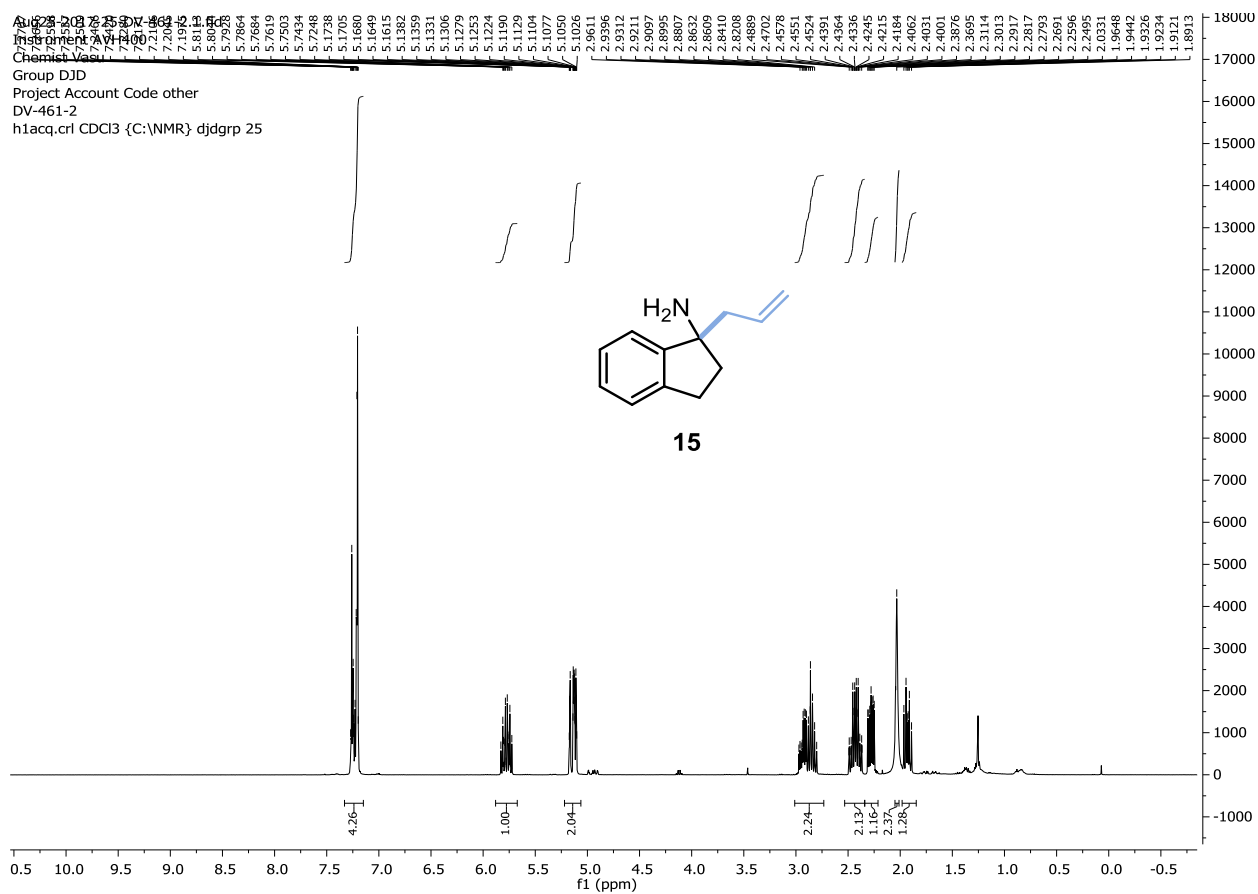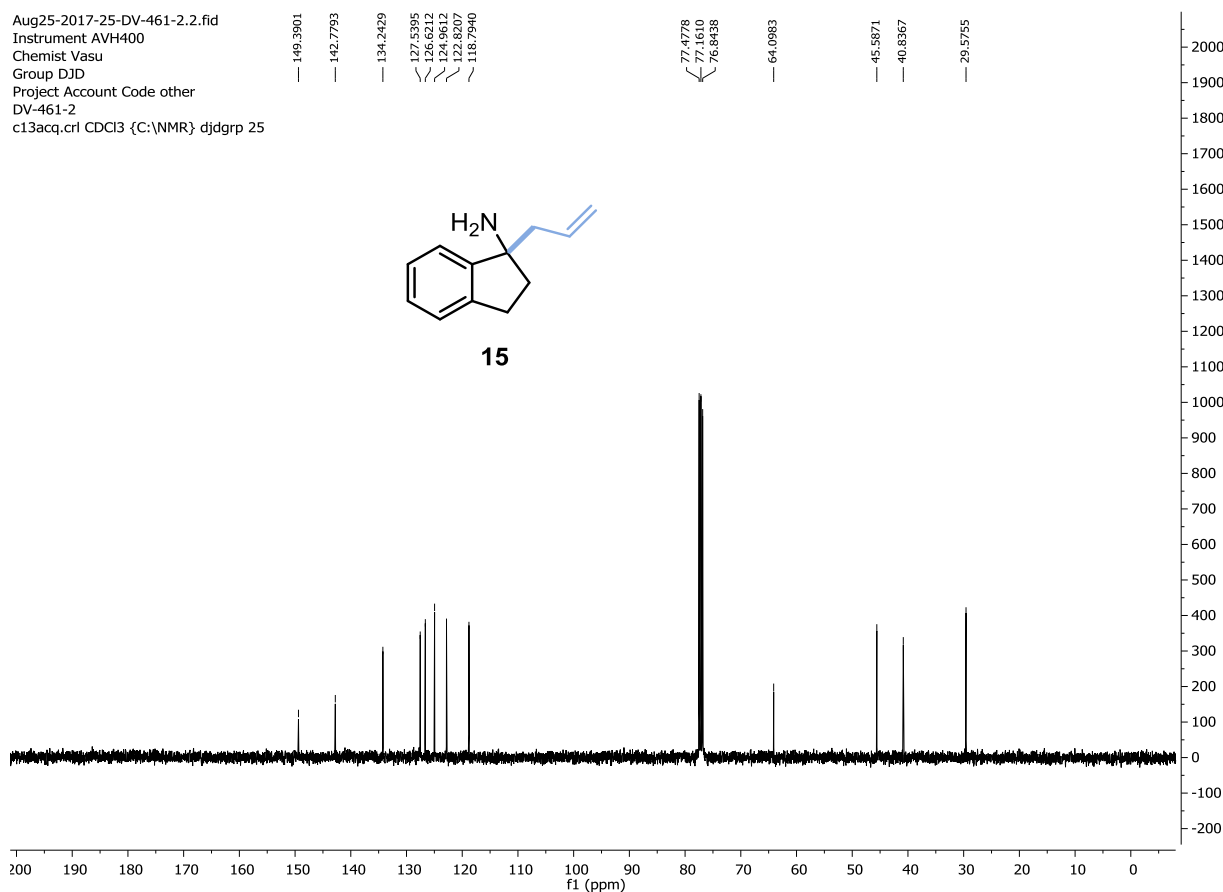

May21-2018-2-DV-480-2.1.fid  
Instrument AVH400  
Chemist Vasu  
Group DJD  
Project Account Code other  
DV-480-2  
h1acq.crl CDCl3 {C:\NMR} djdgrp 2

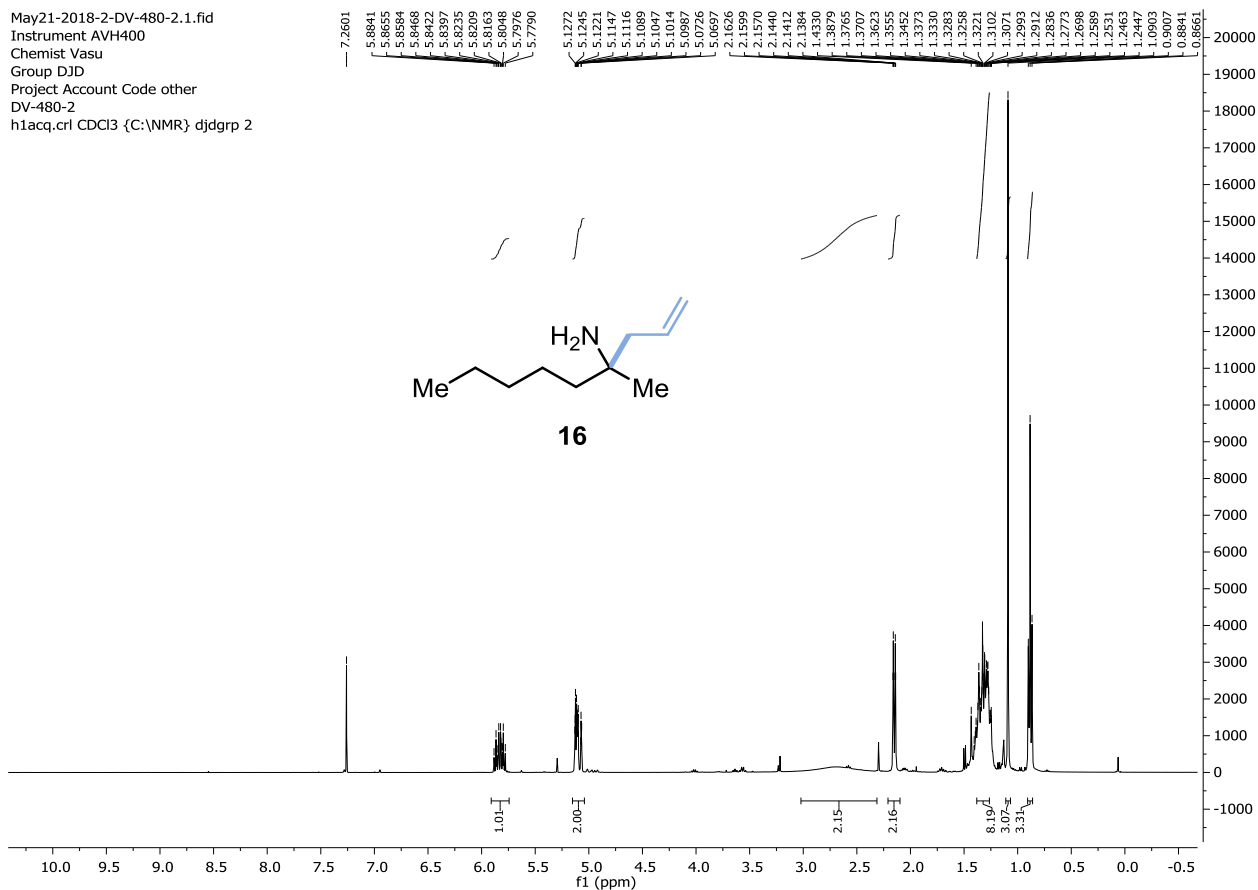

May21-2018-2-DV-480-2.2.fid  
Instrument AVH400  
Chemist Vasu  
Group DJD  
Project Account Code other  
DV-480-2  
c13acq\_512.crl CDCl3 {C:\NMR} djdgrp 2

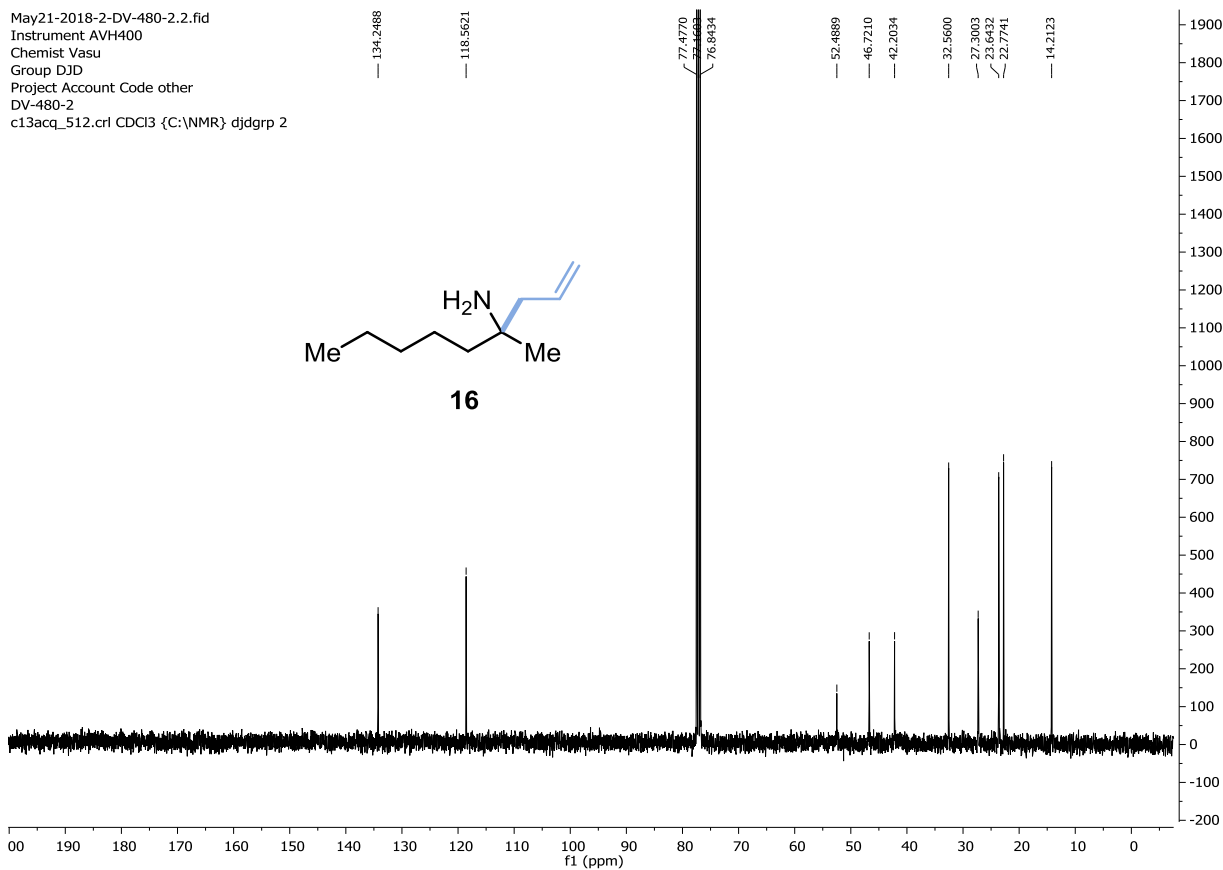

Sep12-2017-1-DV-477-HCl.1.fid  
 Instrument AVH400  
 Chemist Vasu  
 Group DJD  
 Project Account Code other  
 DV-477-HCl  
 h1acq.crl CDCl3 {C:\NMR} djdgrp 1

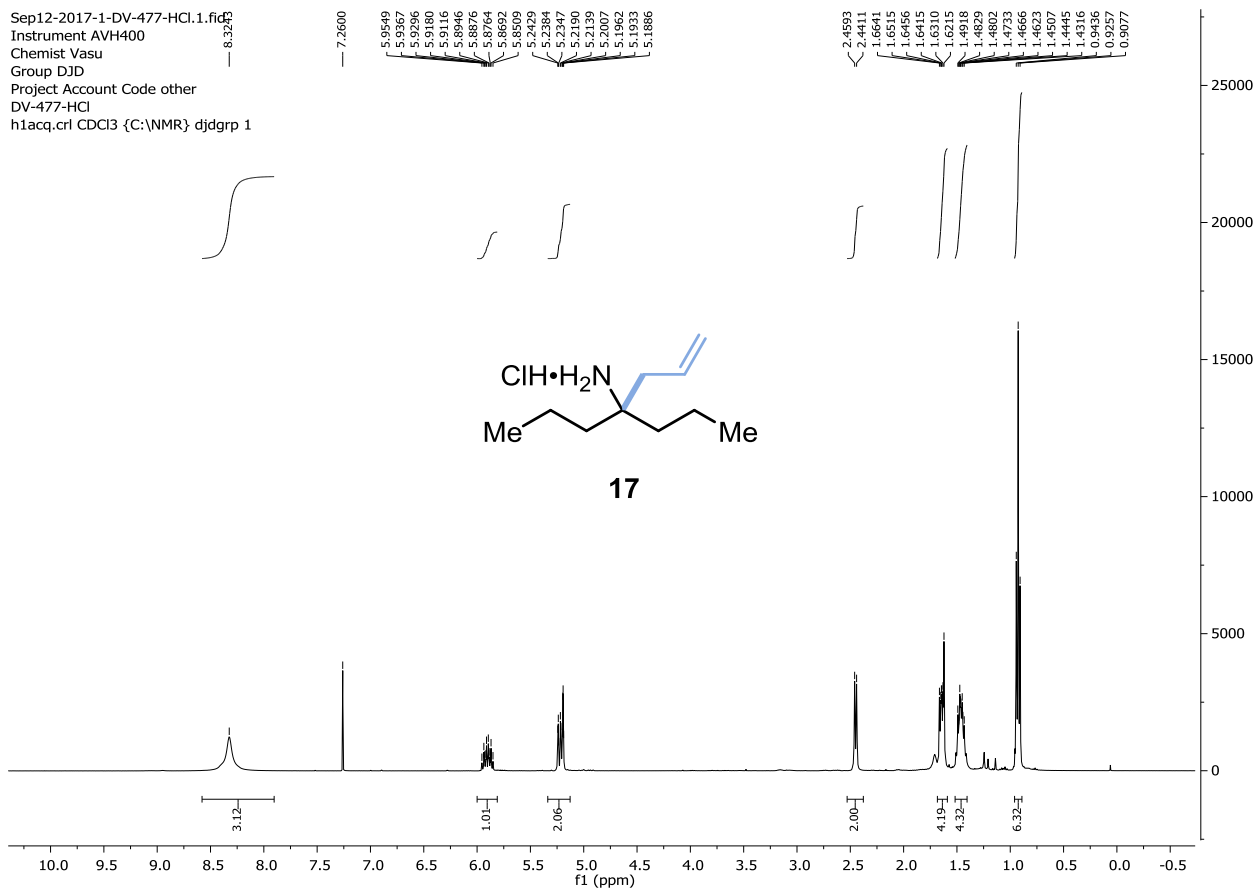

Sep12-2017-1-DV-477-HCl.2.fid  
 Instrument AVH400  
 Chemist Vasu  
 Group DJD  
 Project Account Code other  
 DV-477-HCl  
 c13acq.crl CDCl3 {C:\NMR} djdgrp 1

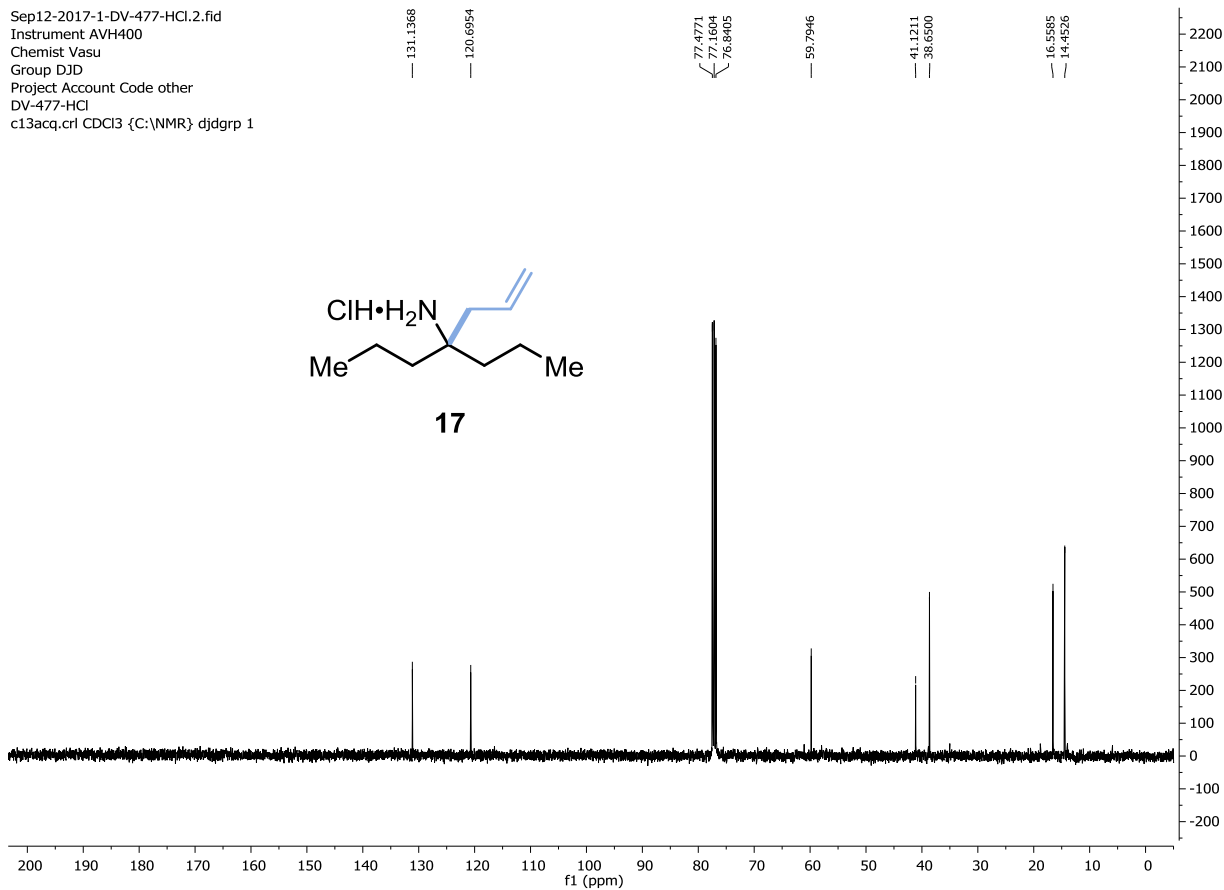

vd02361312.1.fid  
 Instrument AVC500  
 Group DJD  
 Project Account Code DMR00890  
 0236 Vasu Dhananjayan 13/12/17

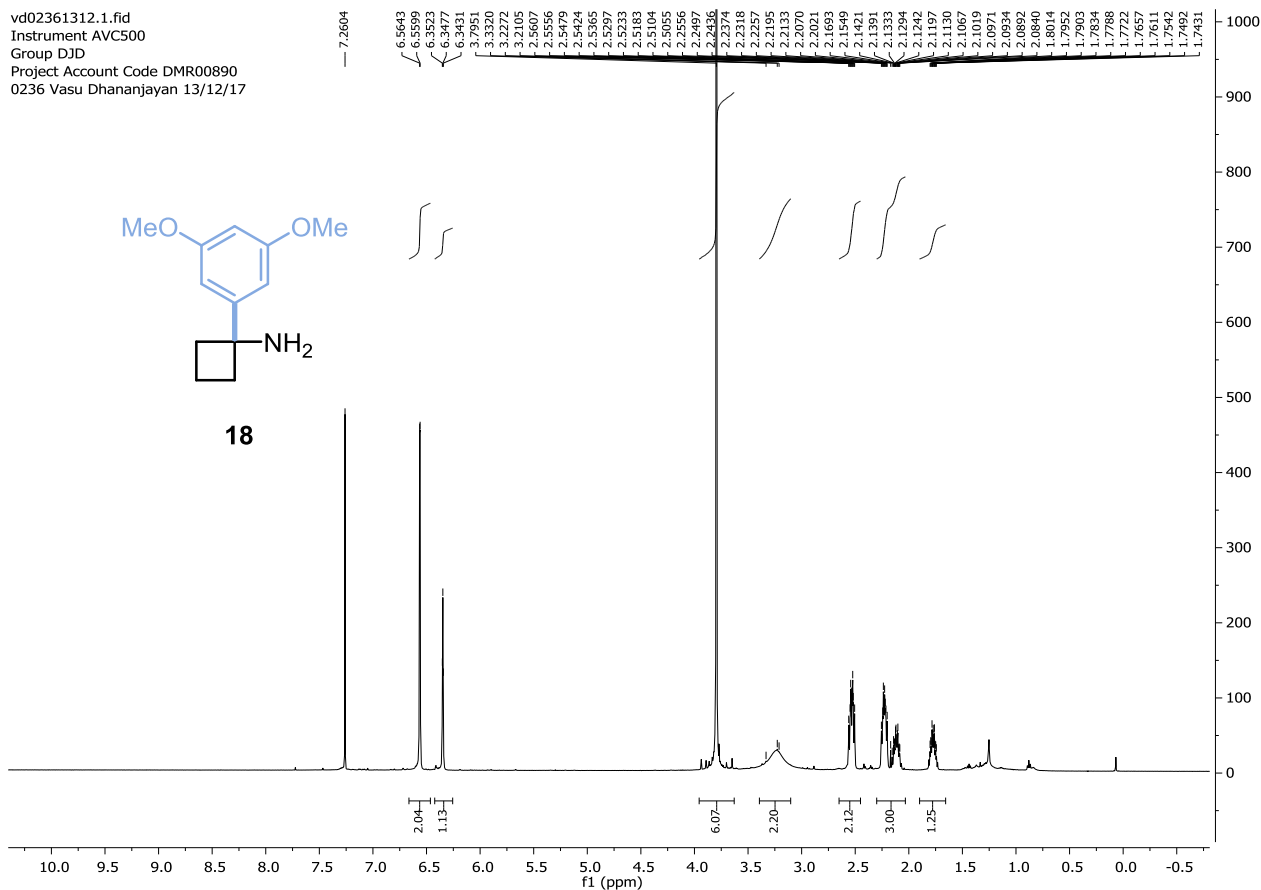

vd02361312.4.fid  
 Instrument AVC500  
 Group DJD  
 Project Account Code DMR00890  
 0236 Vasu Dhananjayan 13/12/17

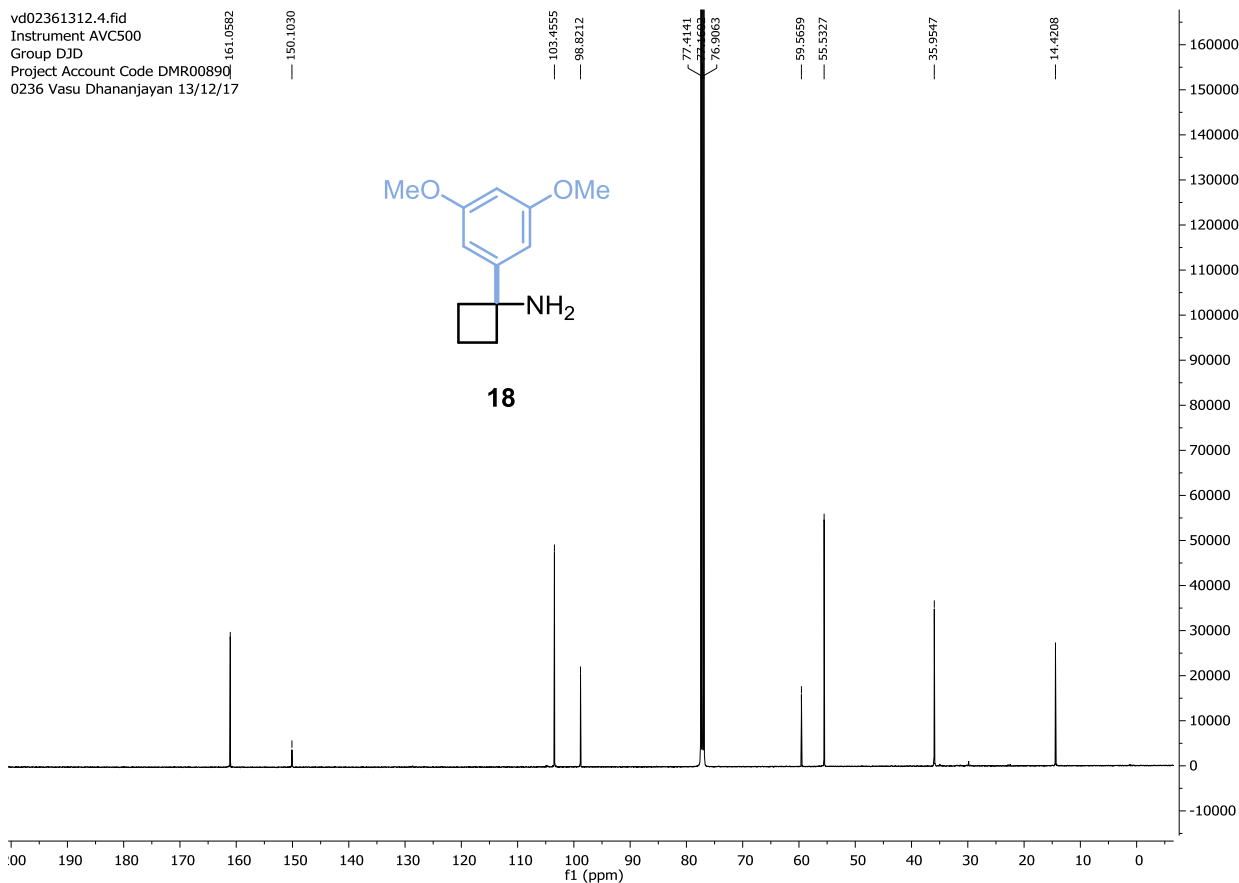

Sep27-2017-42-DV-487-HCl.1.fid  
Instrument AVH400  
Chemist Vasu  
Group DJD  
Project Account Code other  
DV-487-HCl  
h1acq.cri CDCl3 {C:\NMR} djgrp 42

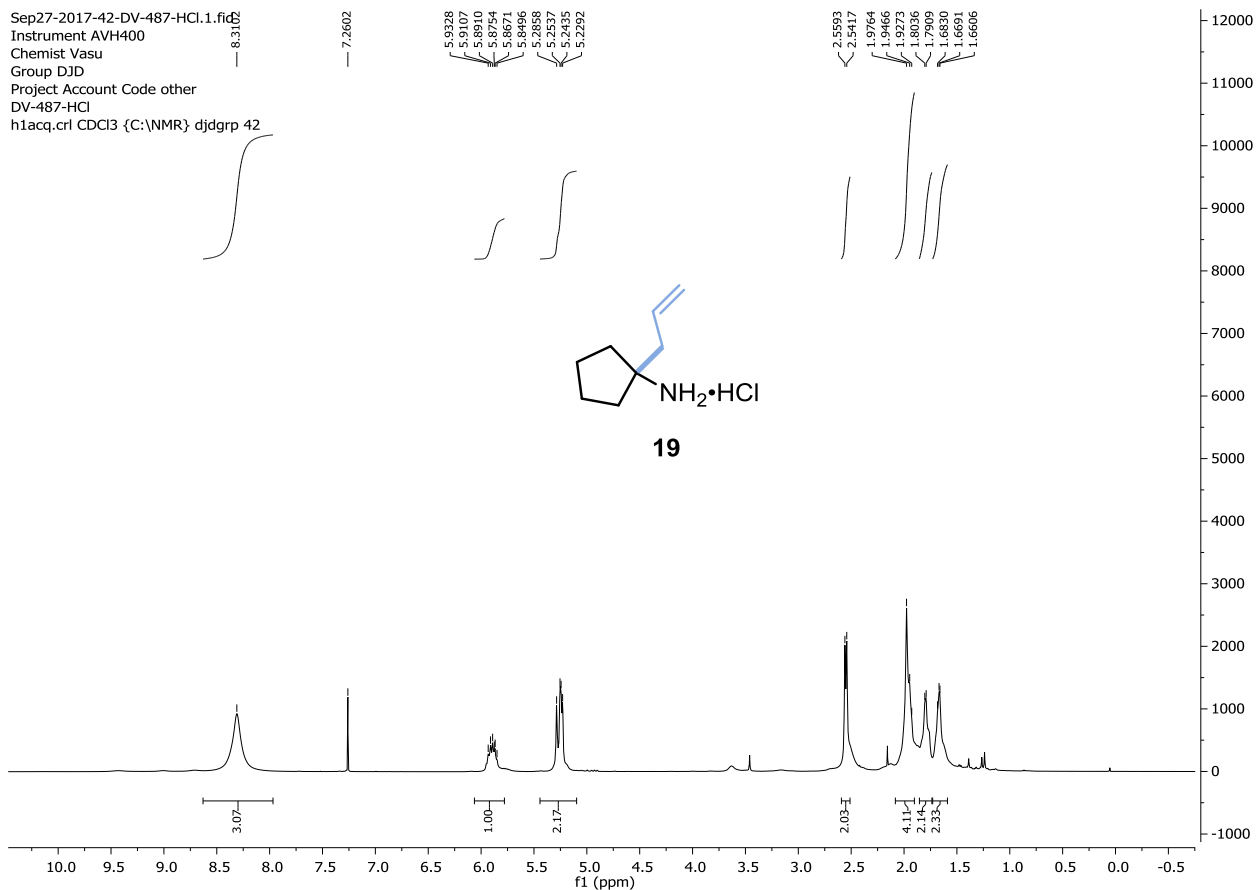

Sep27-2017-42-DV-487-HCl.2.fid  
Instrument AVH400  
Chemist Vasu  
Group DJD  
Project Account Code other  
DV-487-HCl  
c13acq.cri CDCl3 {C:\NMR} djgrp 42

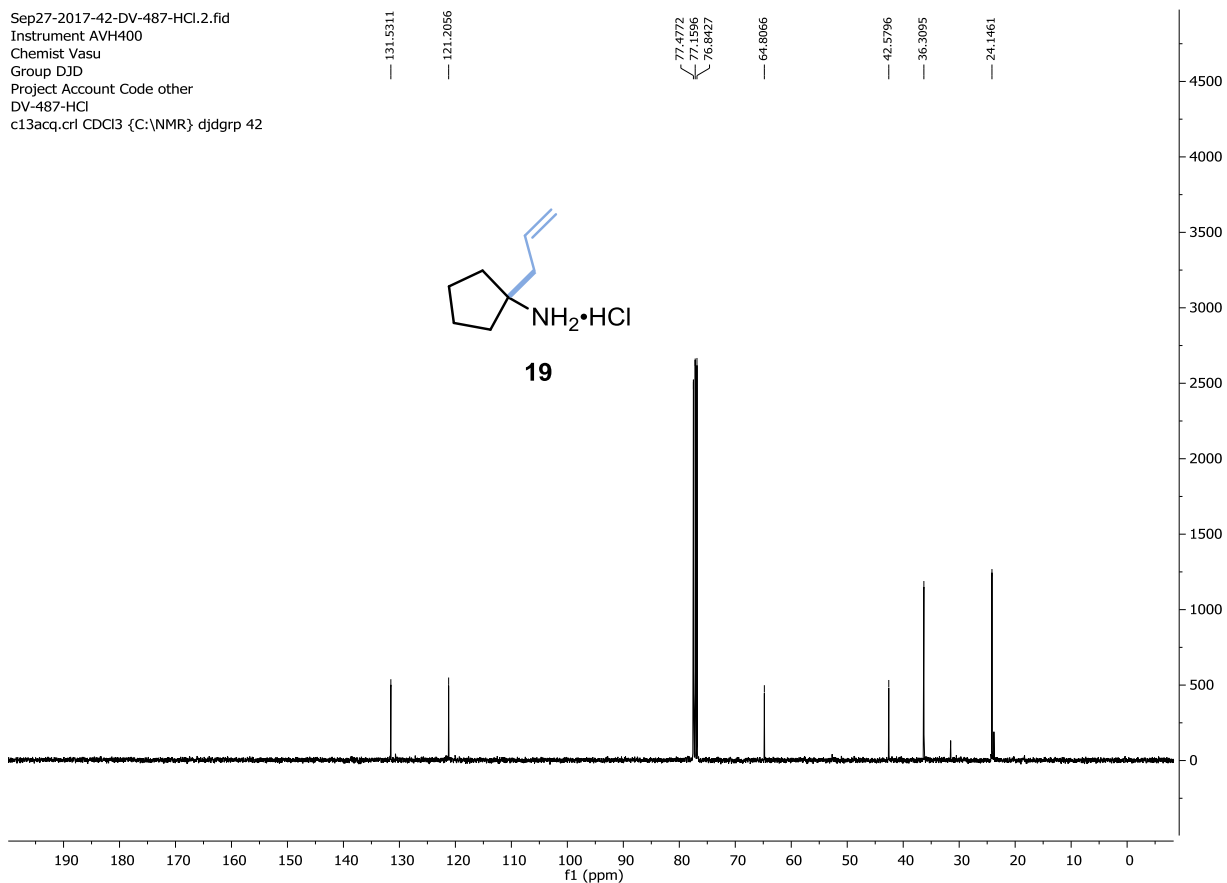

vd01120112.1.fid  
Instrument AVC500  
Group DJD  
Project Account Code DMR00890  
0112 Vasu Dhananjayan 1/12/17

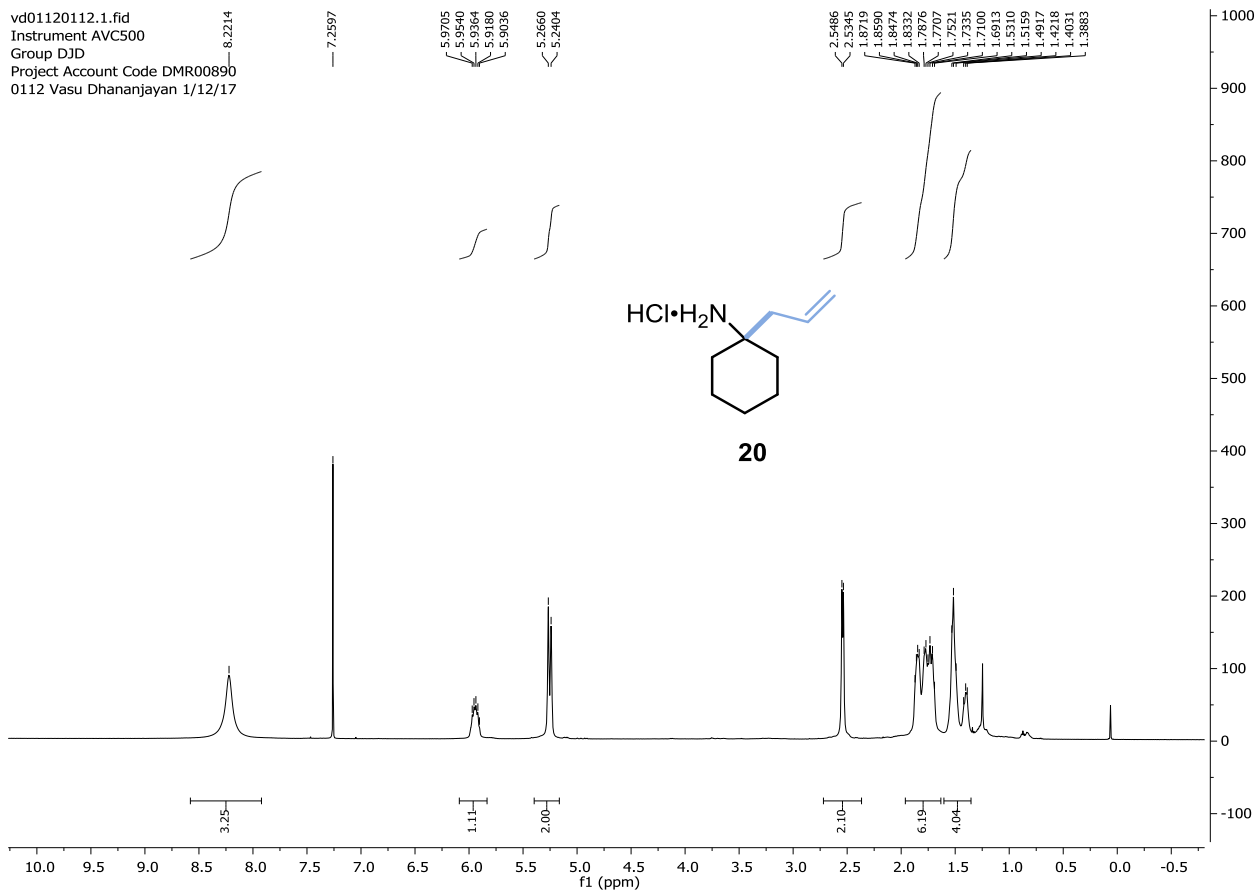

vd01120112.4.fid  
Instrument AVC500  
Group DJD  
Project Account Code DMR00890  
0112 Vasu Dhananjayan 1/12/17

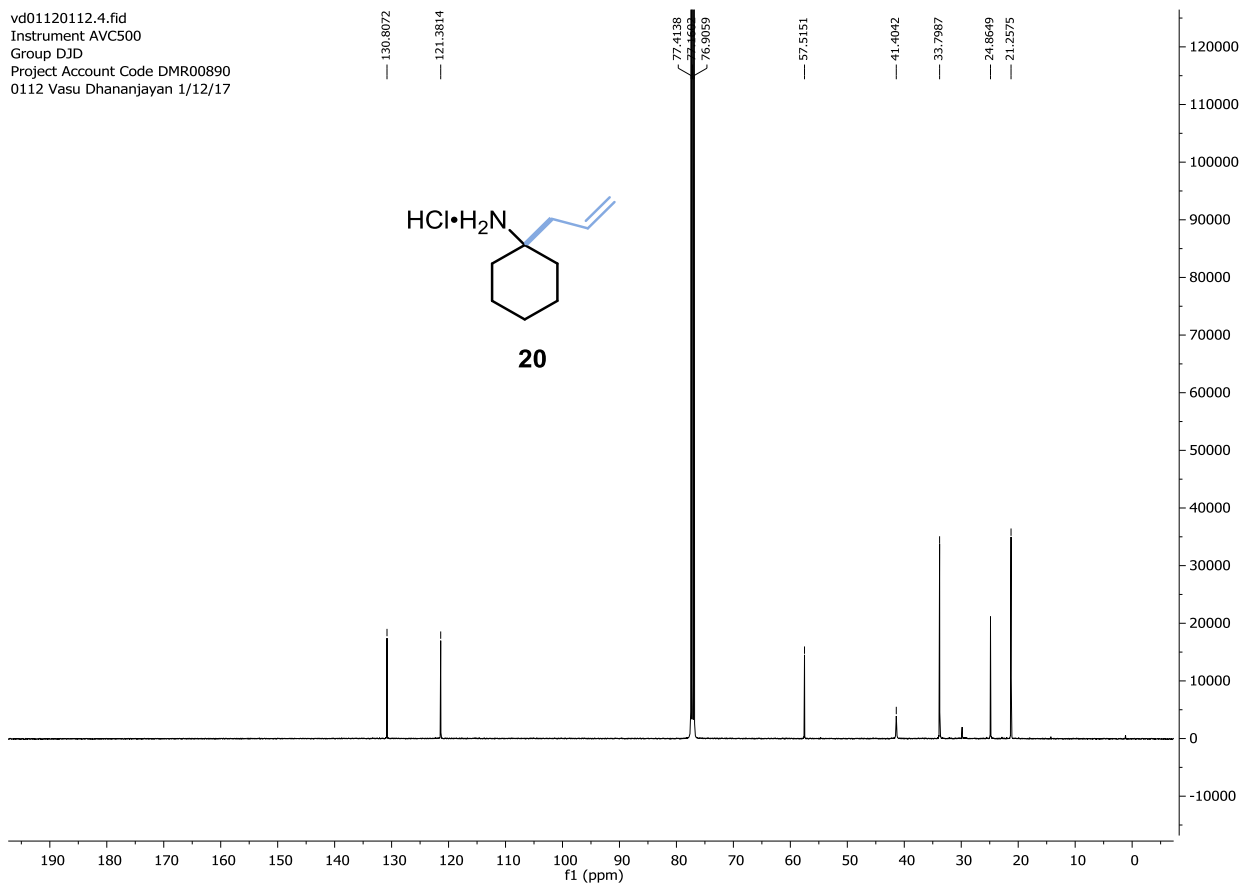



vd83710206.1.fid  
 Instrument AVC500  
 Group DJJ  
 Project Account Code DMR00890  
 8371 Vasu Dhananjayan 2/6/17

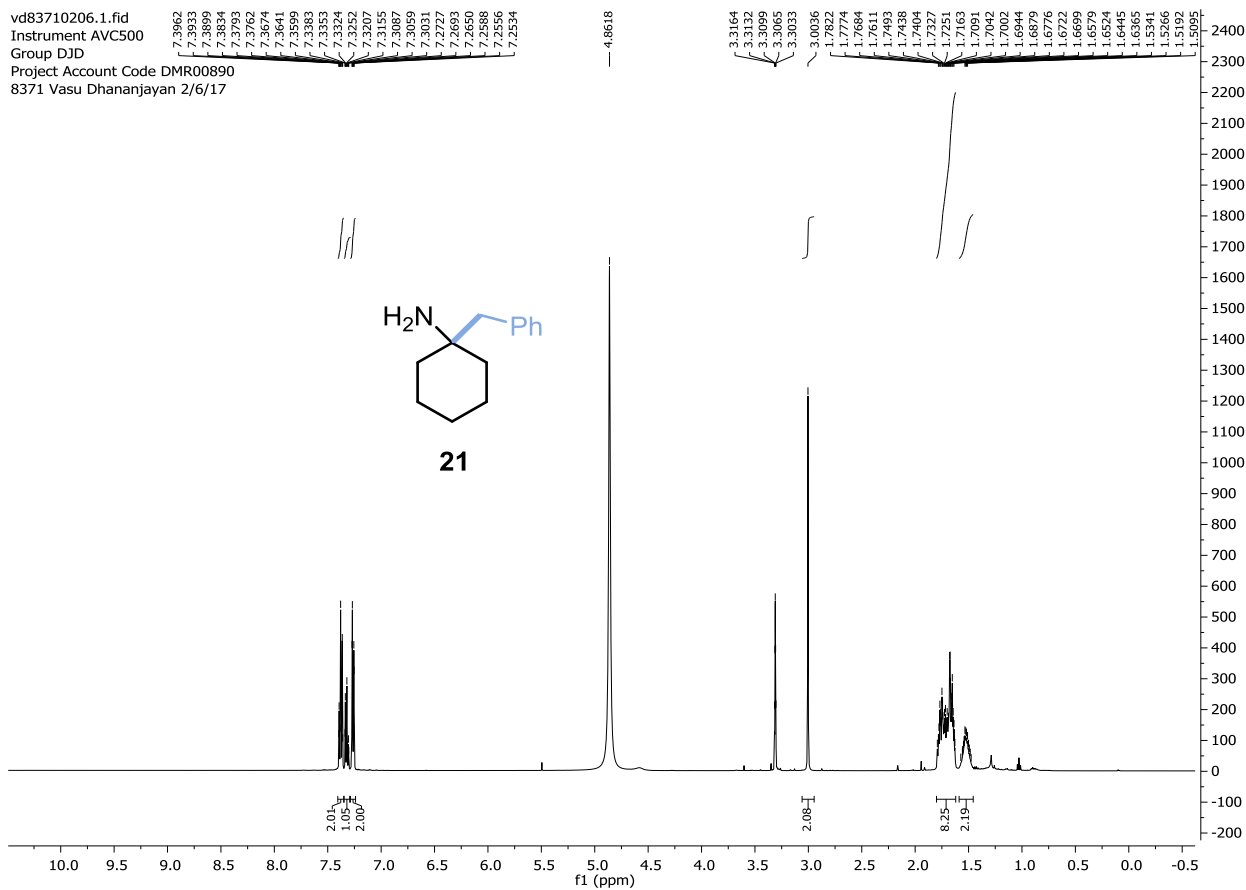

vd83710206.2.fid  
 Instrument AVC500  
 Group DJJ  
 Project Account Code DMR00890  
 8371 Vasu Dhananjayan 2/6/17

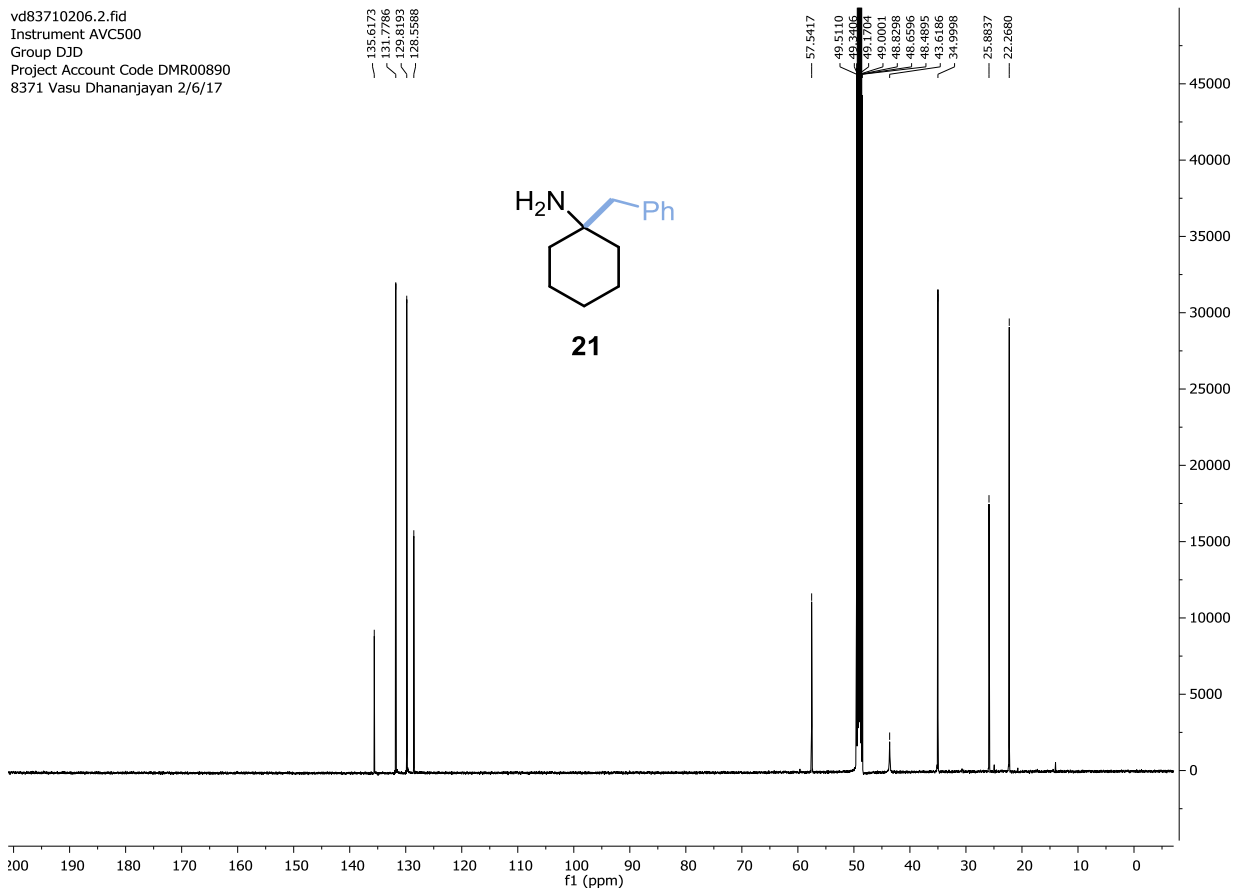

vd87241307.4.fid  
 Group DJD  
 Instrument AVX500  
 Project Account Code DMR00890  
 AVX500 1H  
 8724 Vasu Dhananjayan 13/7/17

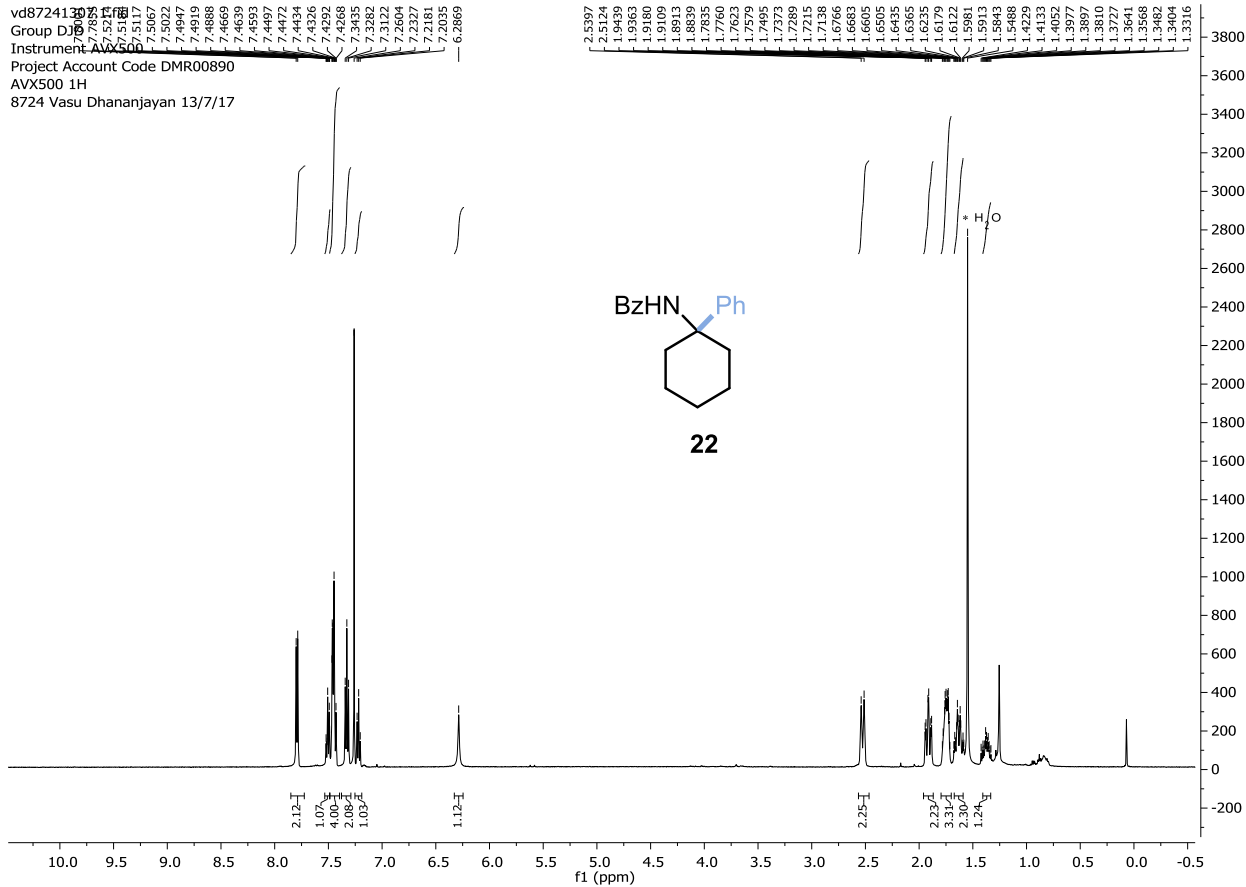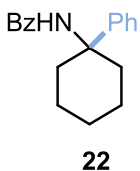

vd87241307.4.fid  
 Group DJD  
 Instrument AVX500  
 Project Account Code DMR00890  
 AVX500 1H  
 8724 Vasu Dhananjayan 13/7/17

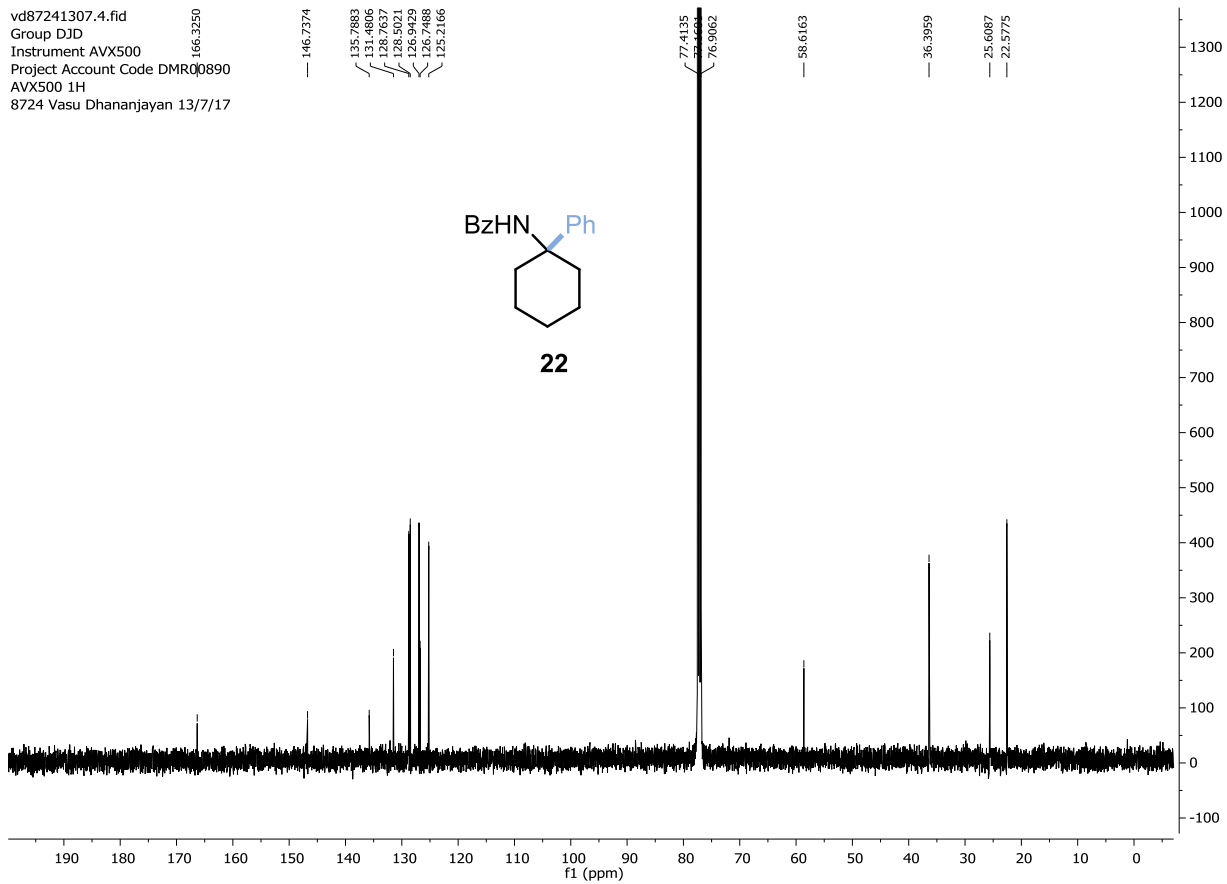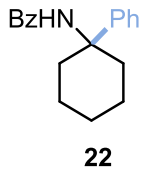

Apr26-2018-43-DV-637-0.2.fid  
 Instrument AVG400  
 Group DJD  
 Chemist Vasu  
 Project Account Code other  
 DV-637-0  
 h1acq.crl CDCl3 {C:\NMR} djdgrp 43

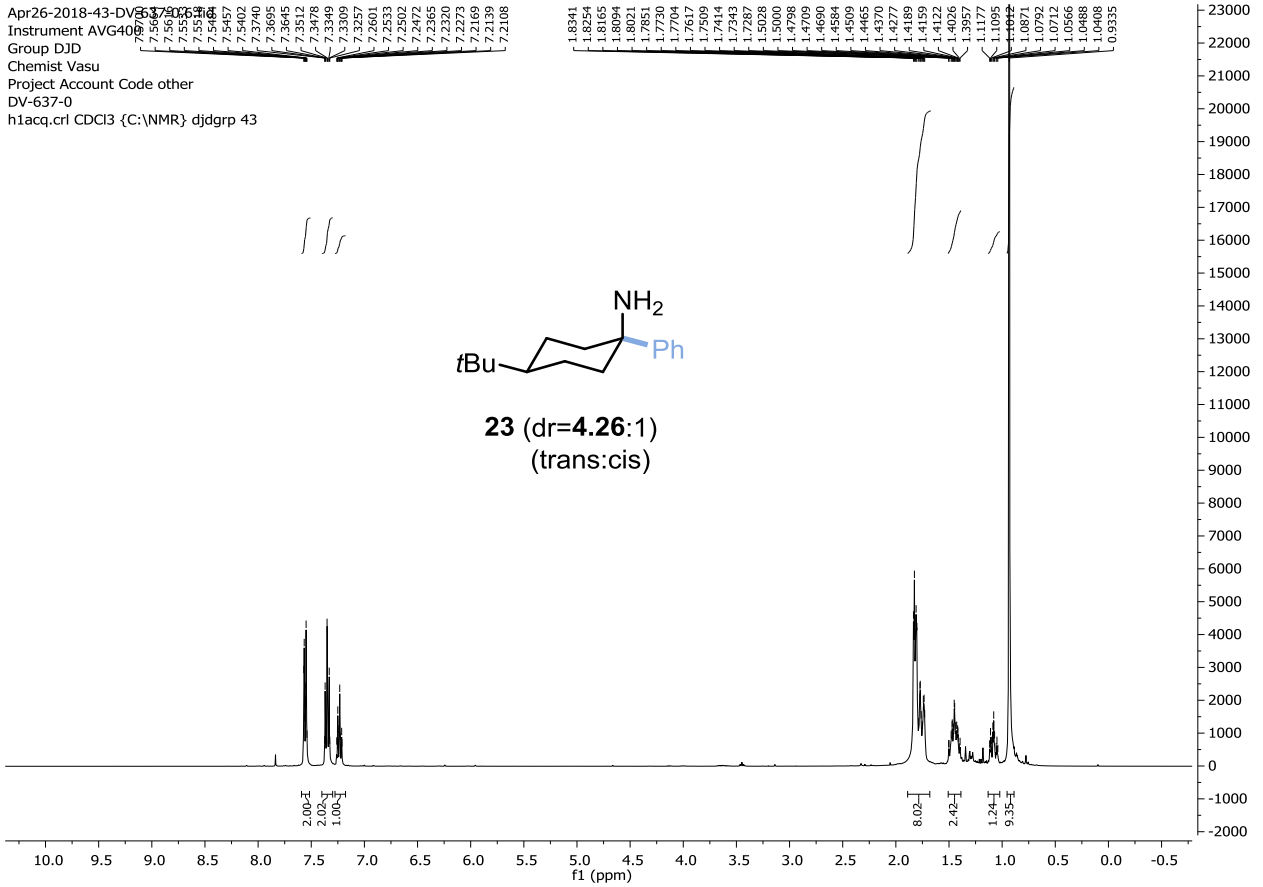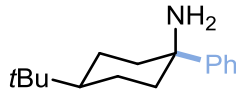

**23** (dr=4.26:1)  
 (trans:cis)

Apr26-2018-43-DV-637-0.2.fid  
 Instrument AVG400  
 Group DJD  
 Chemist Vasu  
 Project Account Code other  
 DV-637-0  
 c13acq\_512.crl CDCl3 {C:\NMR} djdgrp 43

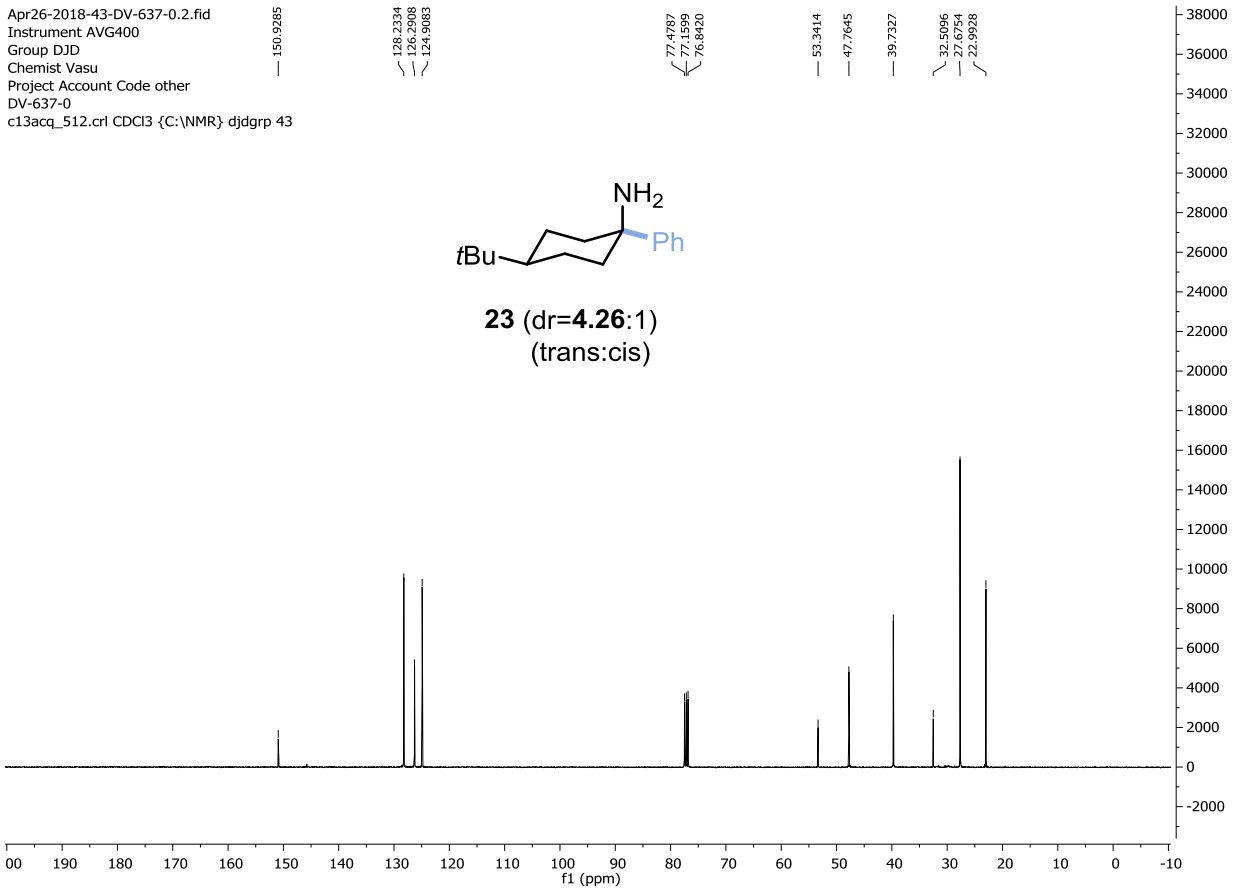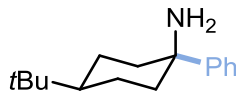

**23** (dr=4.26:1)  
 (trans:cis)

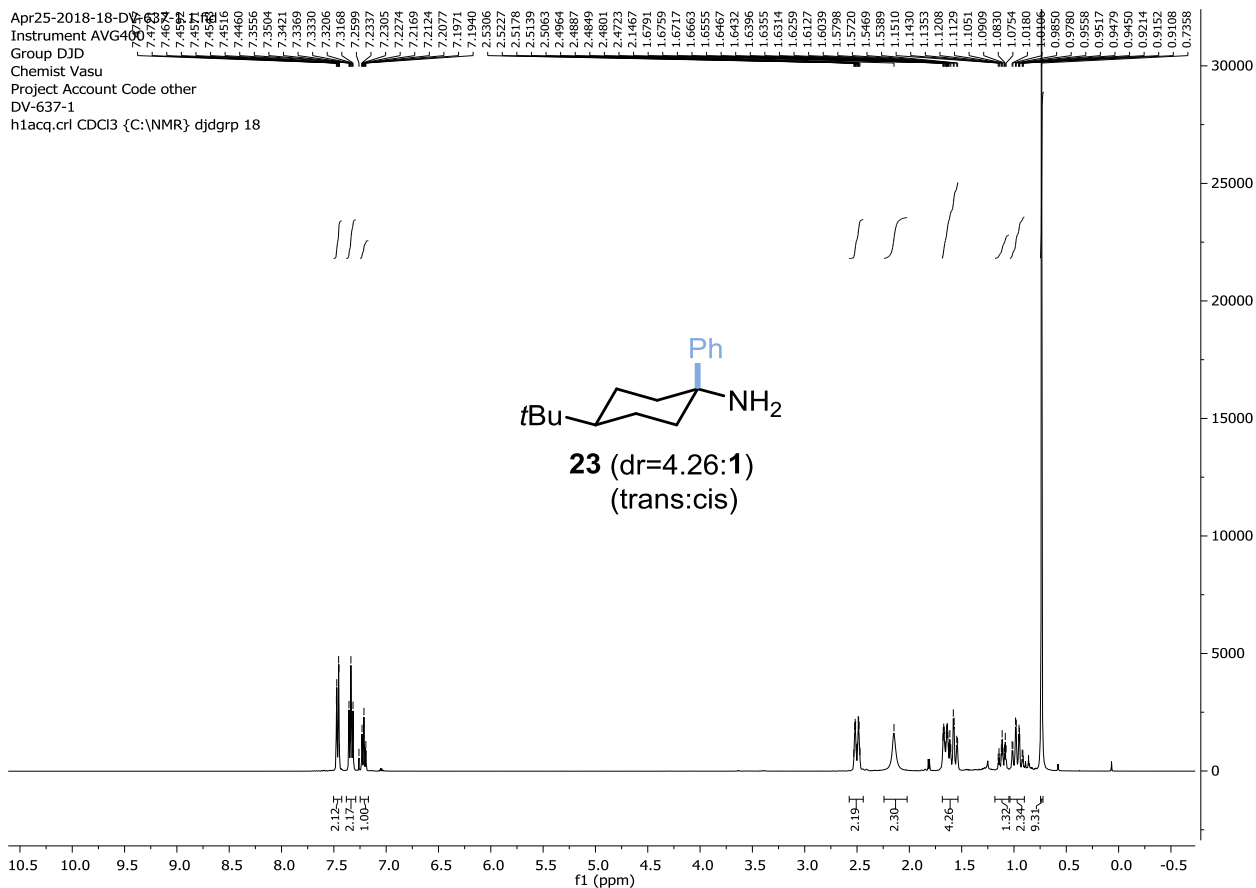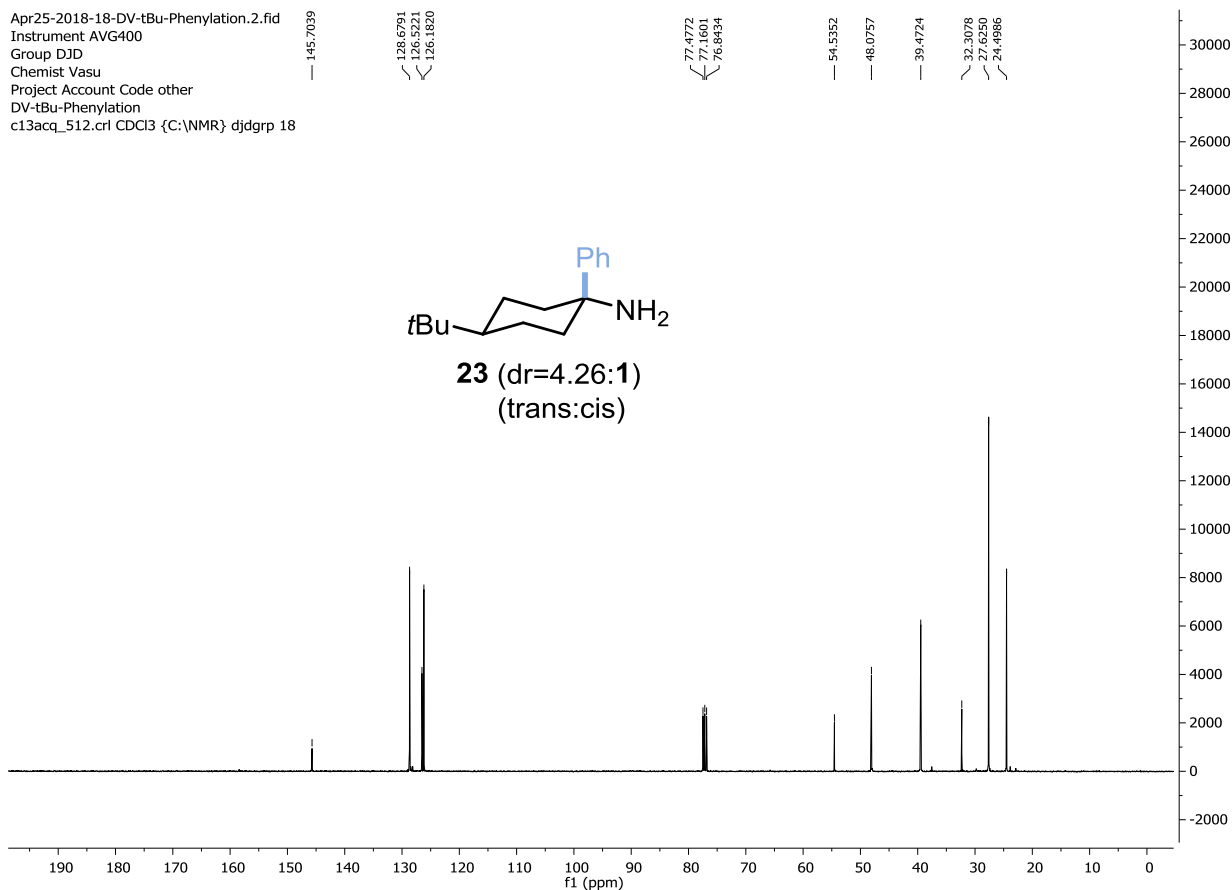

Aug16-2017-11-DV-454-HCl-solid.1.fid  
 Instrument AVH400  
 Chemist Vasu  
 Group DJD  
 Project Account Code other  
 DV-454-HCl-solid  
 h1acq.crl CDCl3 {C:\NMR} djgrp 11

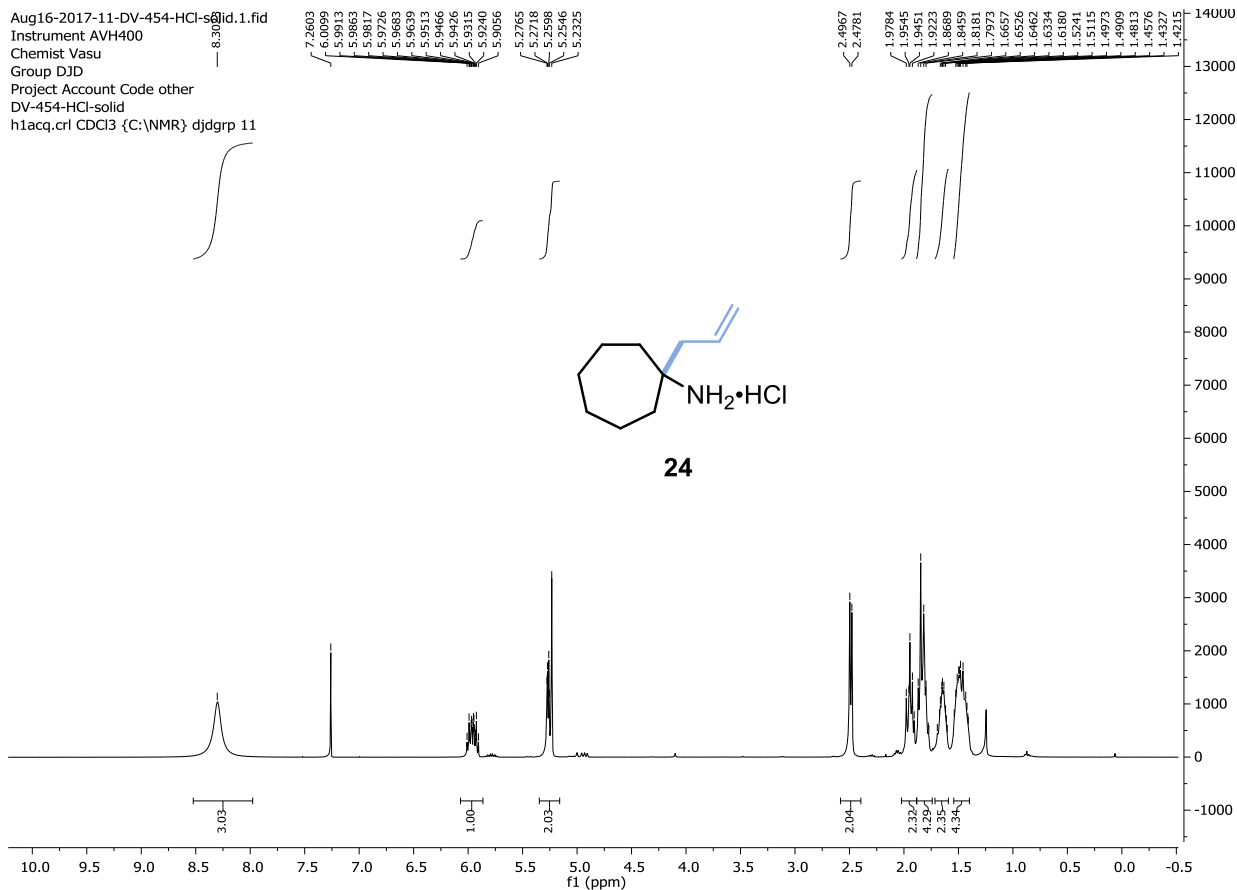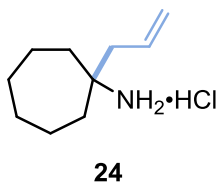

Aug16-2017-11-DV-454-HCl-solid.2.fid  
 Instrument AVH400  
 Chemist Vasu  
 Group DJD  
 Project Account Code other  
 DV-454-HCl-solid  
 c13acq.crl CDCl3 {C:\NMR} djgrp 11

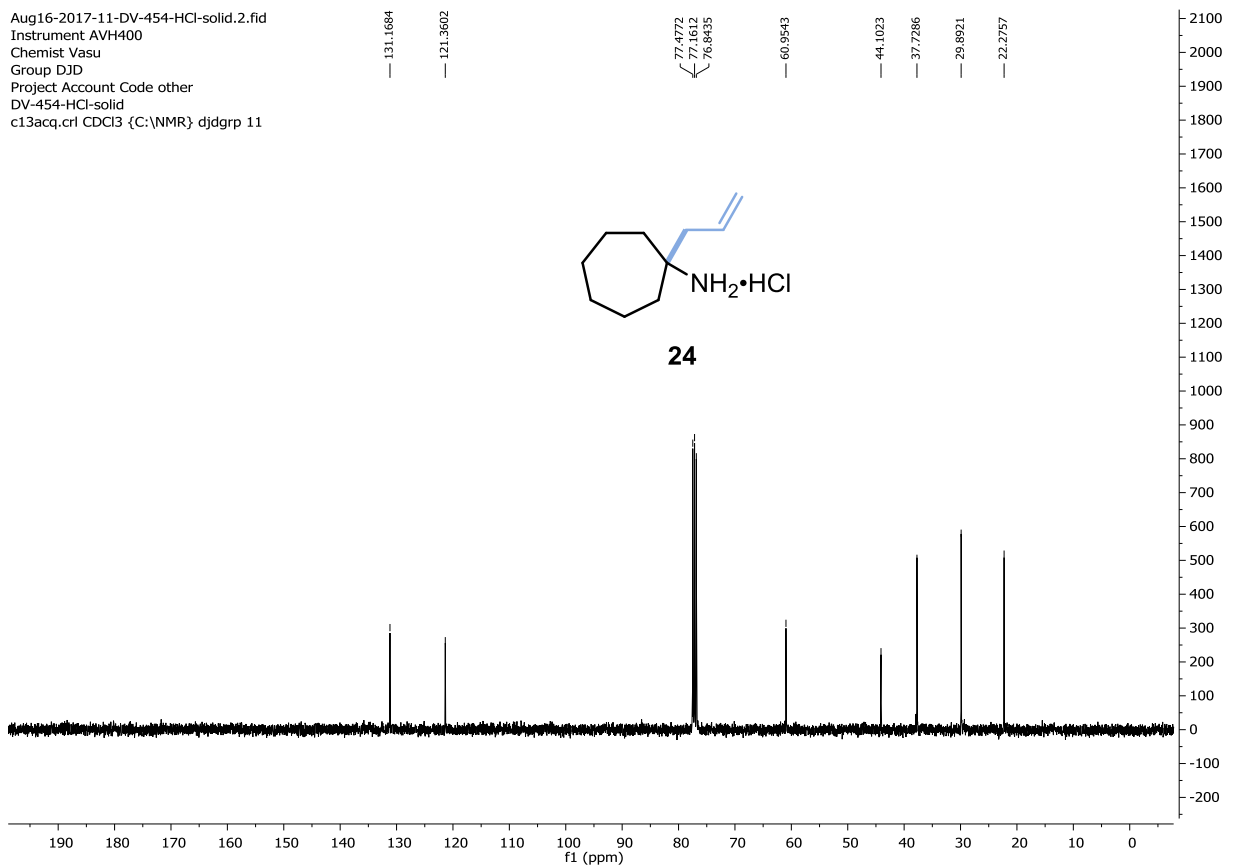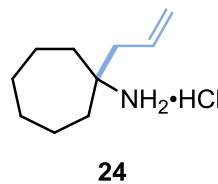

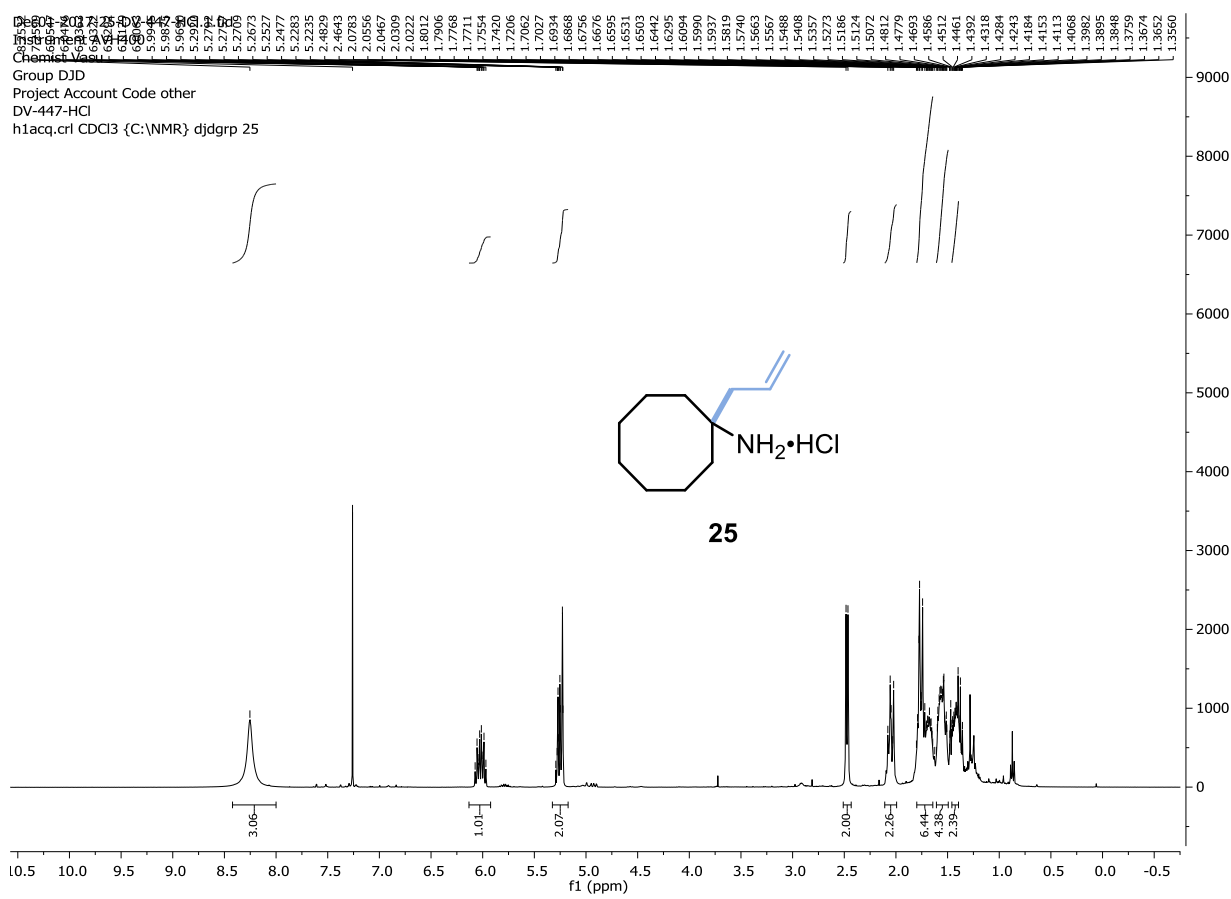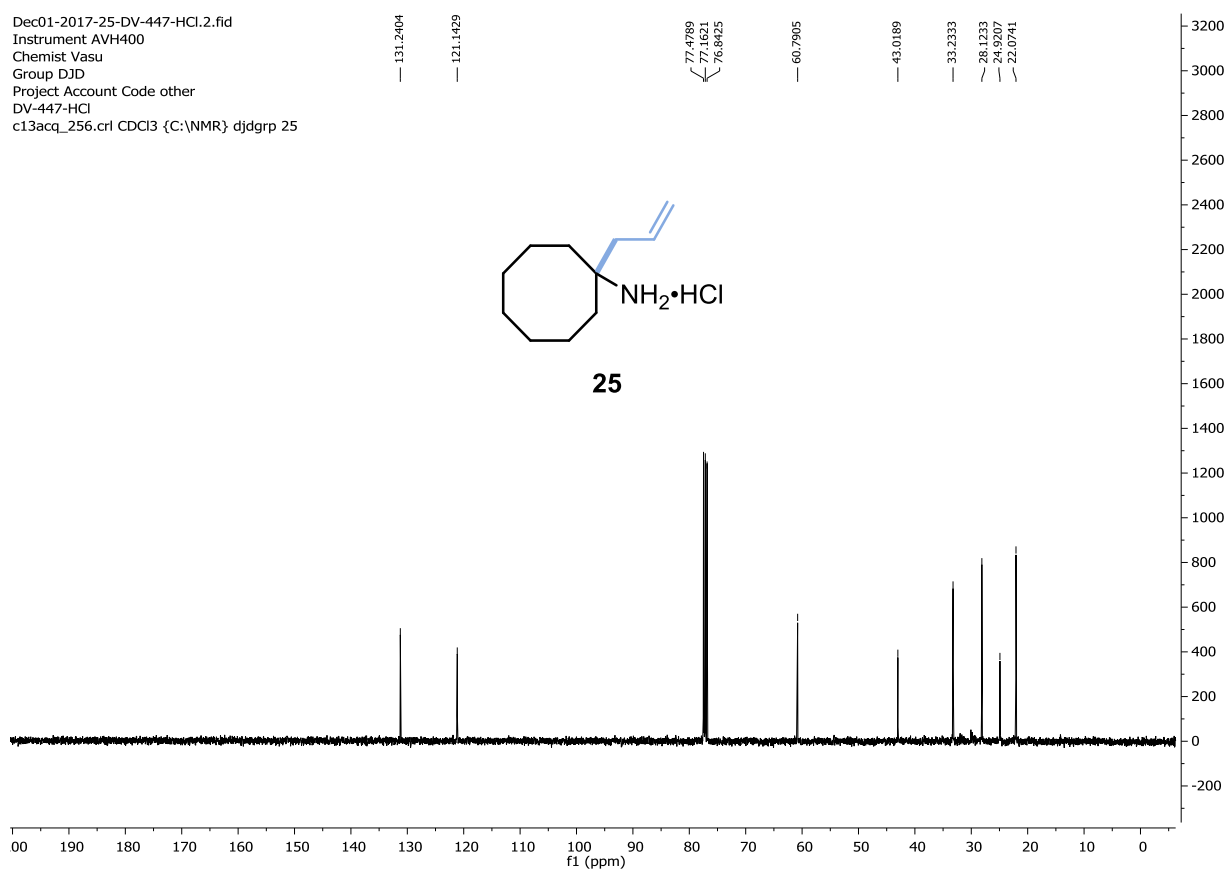

Nov24-2017-5-DV-553.1.fid  
 Instrument AVH400  
 Chemist Vasu  
 Group DJD  
 Project Account Code other  
 DV-553  
 h13acq.crl CDCl3 {C:\NMR} djgrp 5

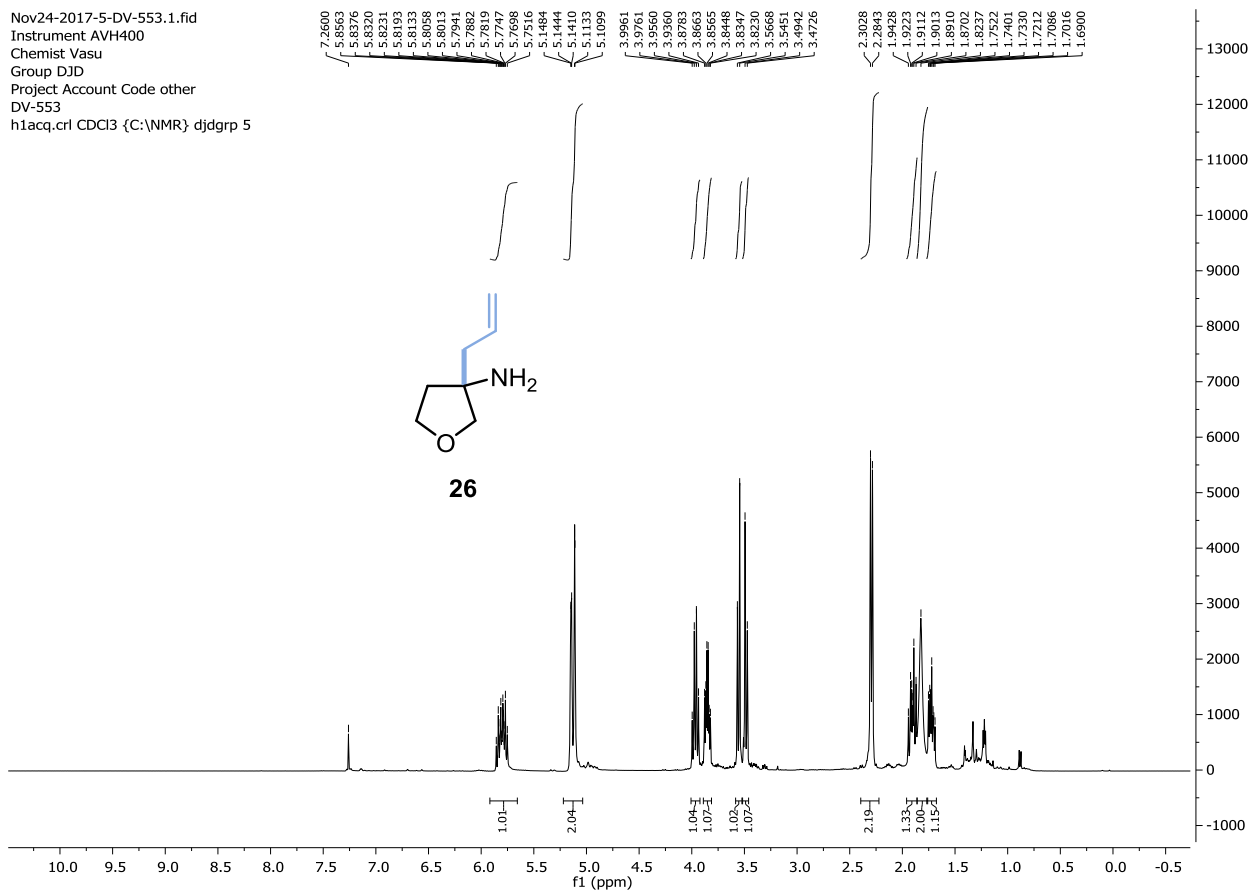

Nov24-2017-5-DV-553.2.fid  
 Instrument AVH400  
 Chemist Vasu  
 Group DJD  
 Project Account Code other  
 DV-553  
 c13acq\_512.crl CDCl3 {C:\NMR} djgrp 5

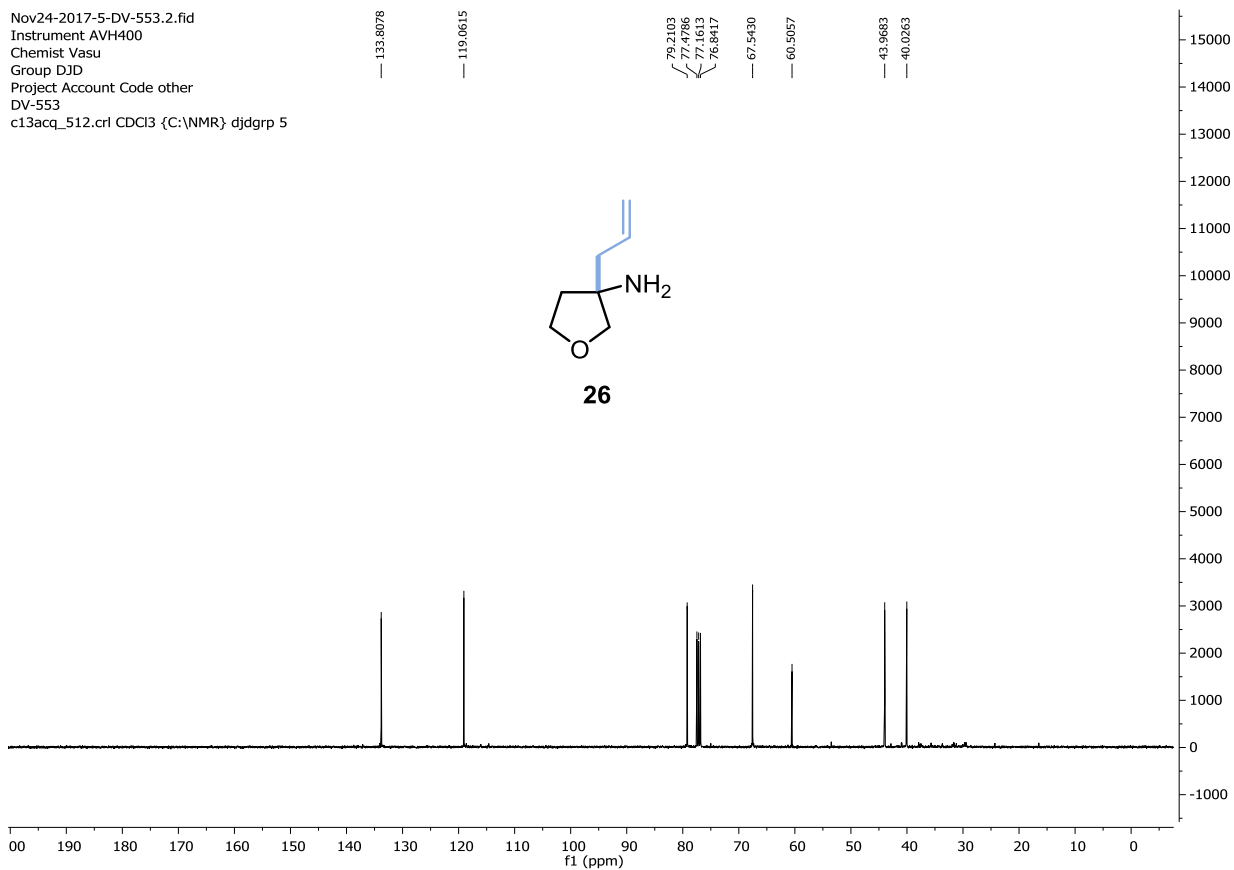

Apr19-2018-3-DV-636-large.1.fid  
 Instrument AVH400  
 Chemist Vasu  
 Group DJD  
 Project Account Code other  
 DV-636-large  
 h1acq.cri CDCl3 {C:\NMR} djdgrp 3

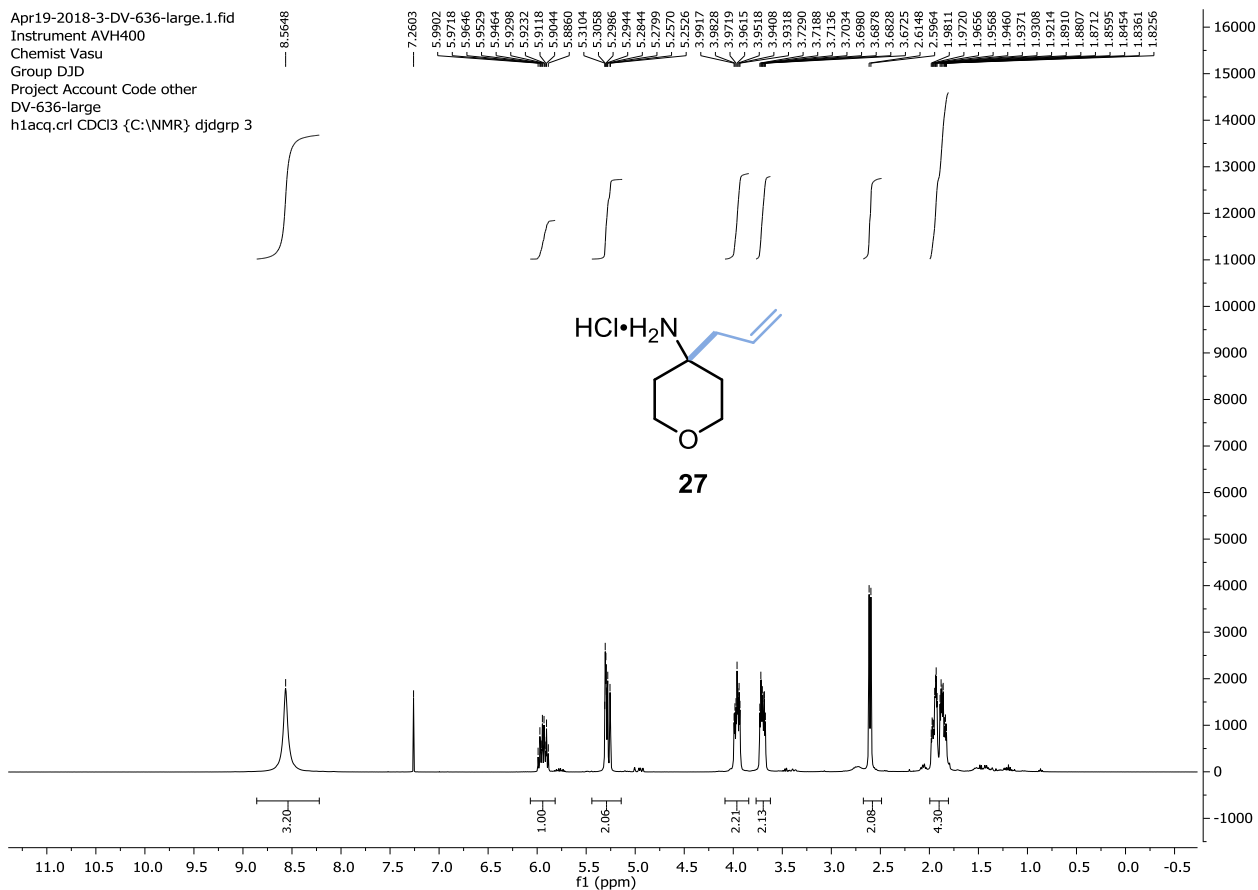

Apr19-2018-3-DV-636-large.2.fid  
 Instrument AVH400  
 Chemist Vasu  
 Group DJD  
 Project Account Code other  
 DV-636-large  
 c13acq\_512.cri CDCl3 {C:\NMR} djdgrp 3

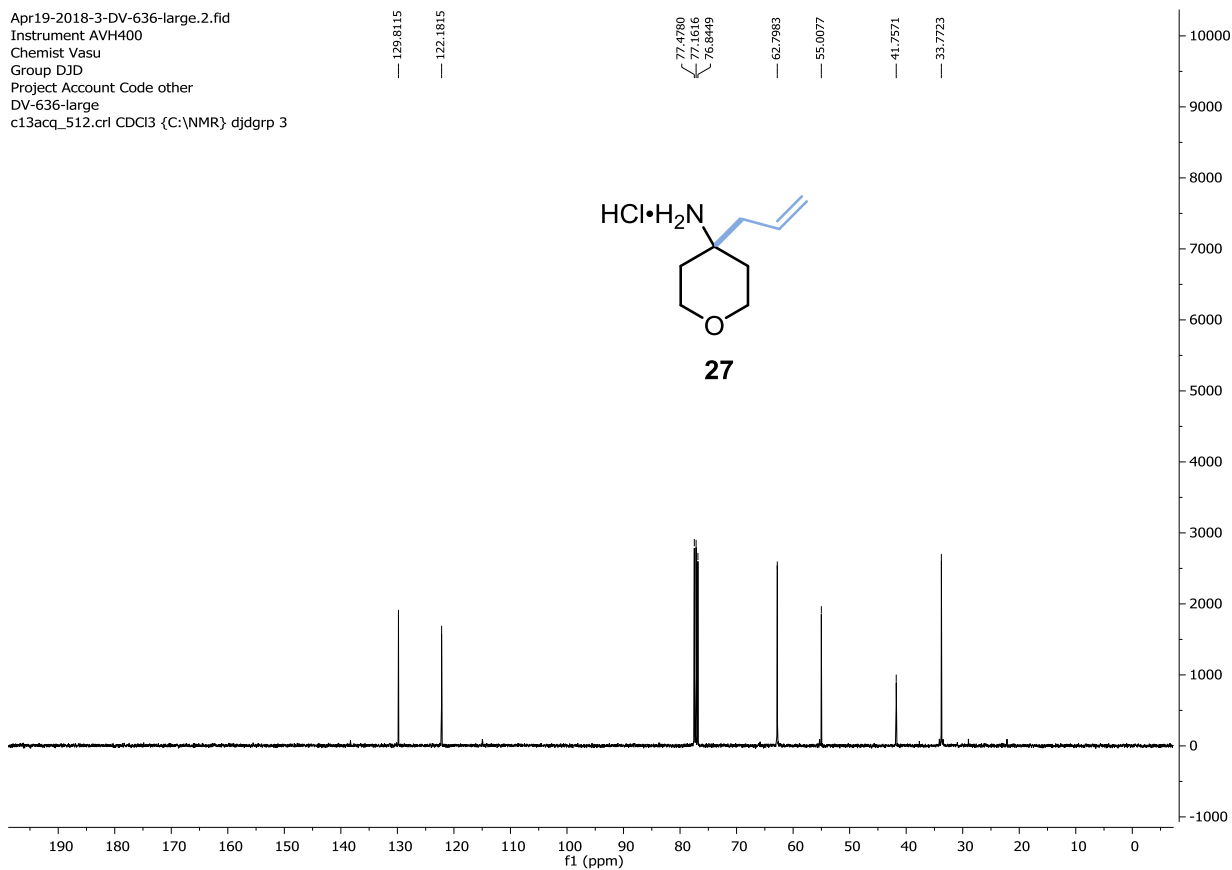



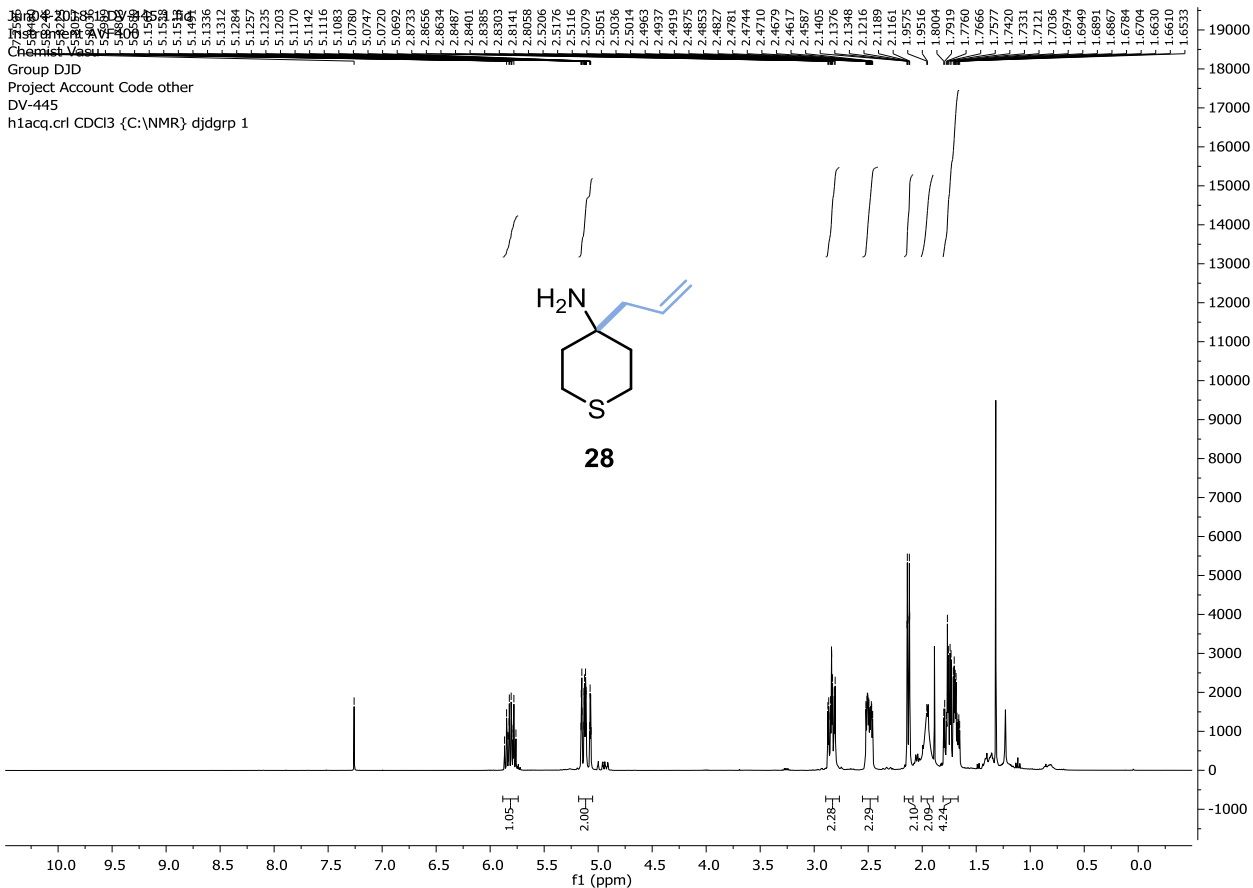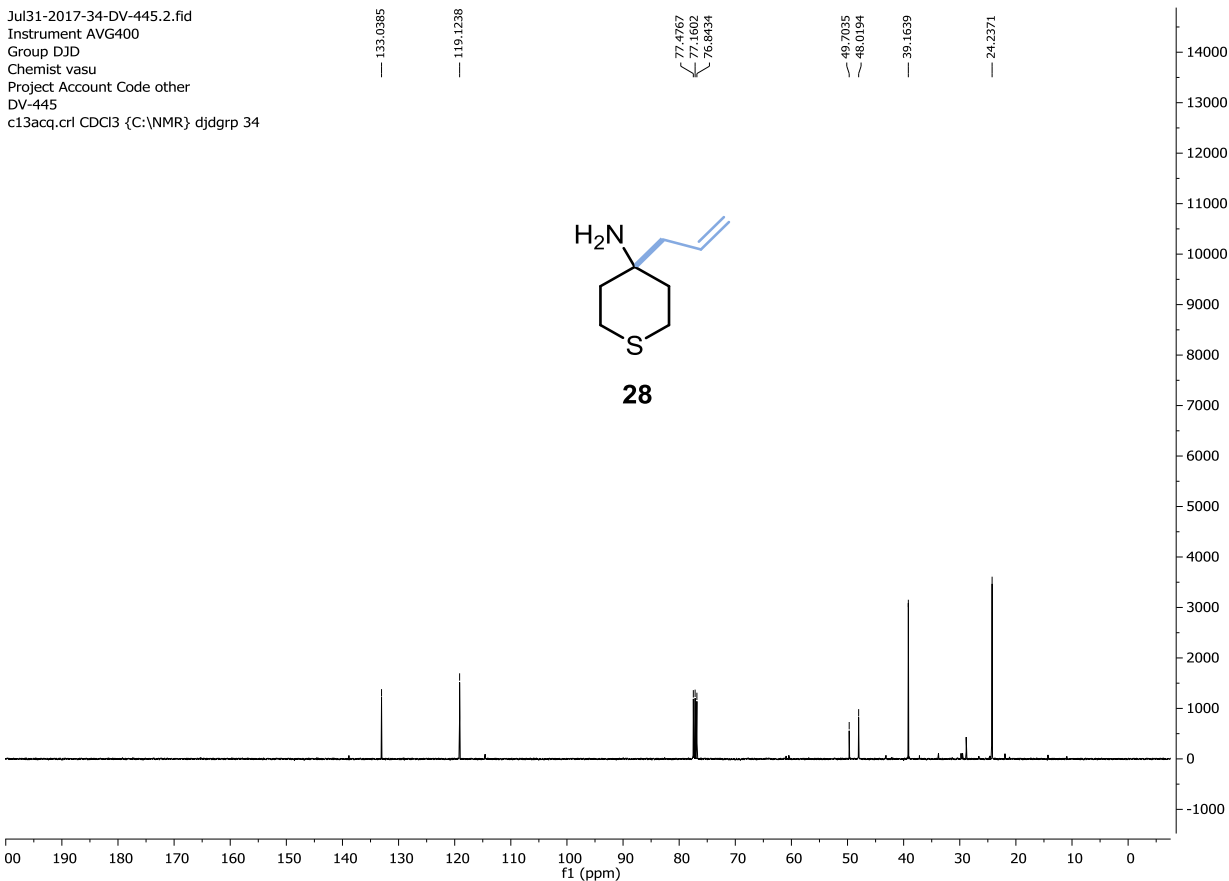

Jun21-2017-7-DV-432-2.1.fid  
 Instrument AVG400  
 Group DJD  
 Chemist VASu  
 Project Account Code other  
 DV-432-2  
 h1acq.crl MeOD {C:\NMR} djdgrp 7

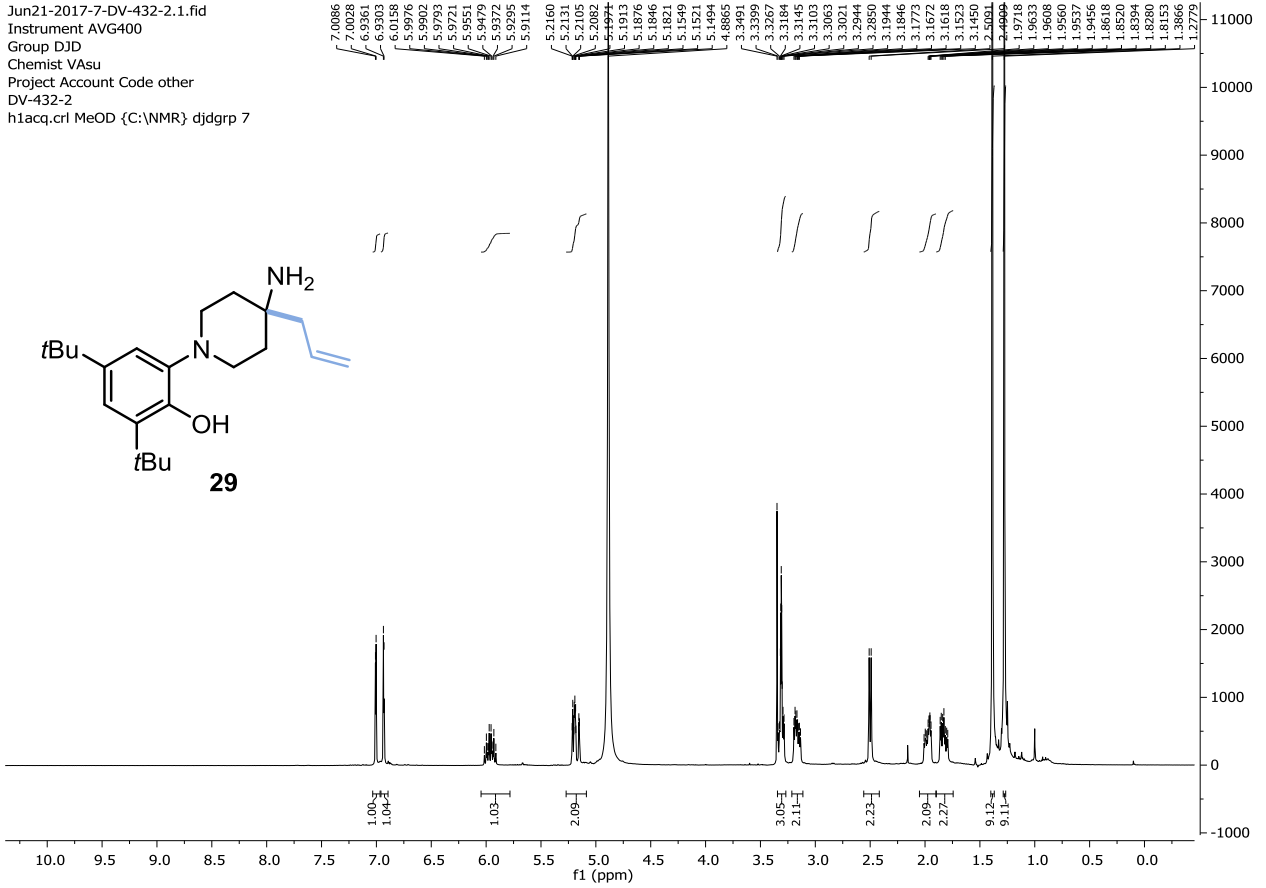

Jun21-2017-7-DV-432-2.2.fid  
 Instrument AVG400  
 Group DJD  
 Chemist VASu  
 Project Account Code other  
 DV-432-2  
 c13acq.crl MeOD {C:\NMR} djdgrp 7

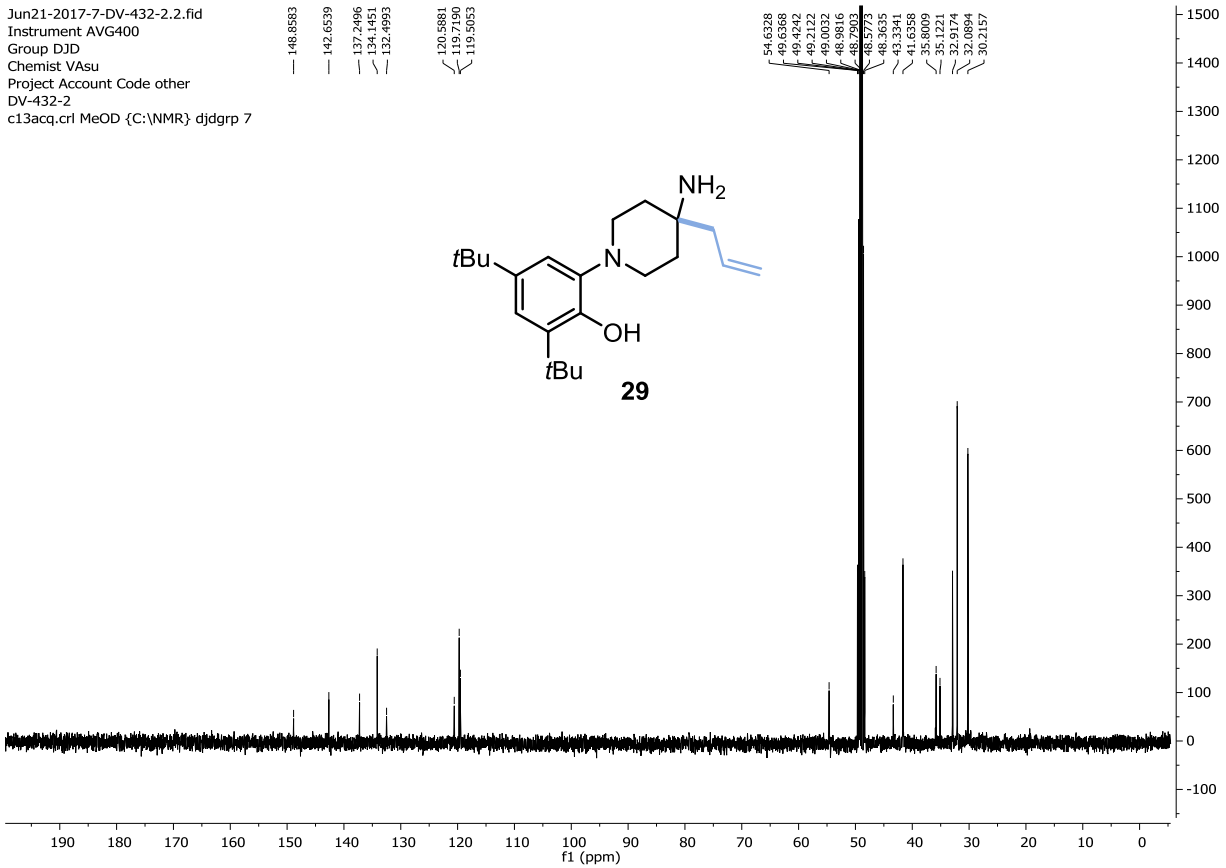

vd21522405.1.fid  
Instrument AVCS00  
Group DJD  
Project Account Code DMR00890  
2152 Vasu Dhananjayan 24/5/18

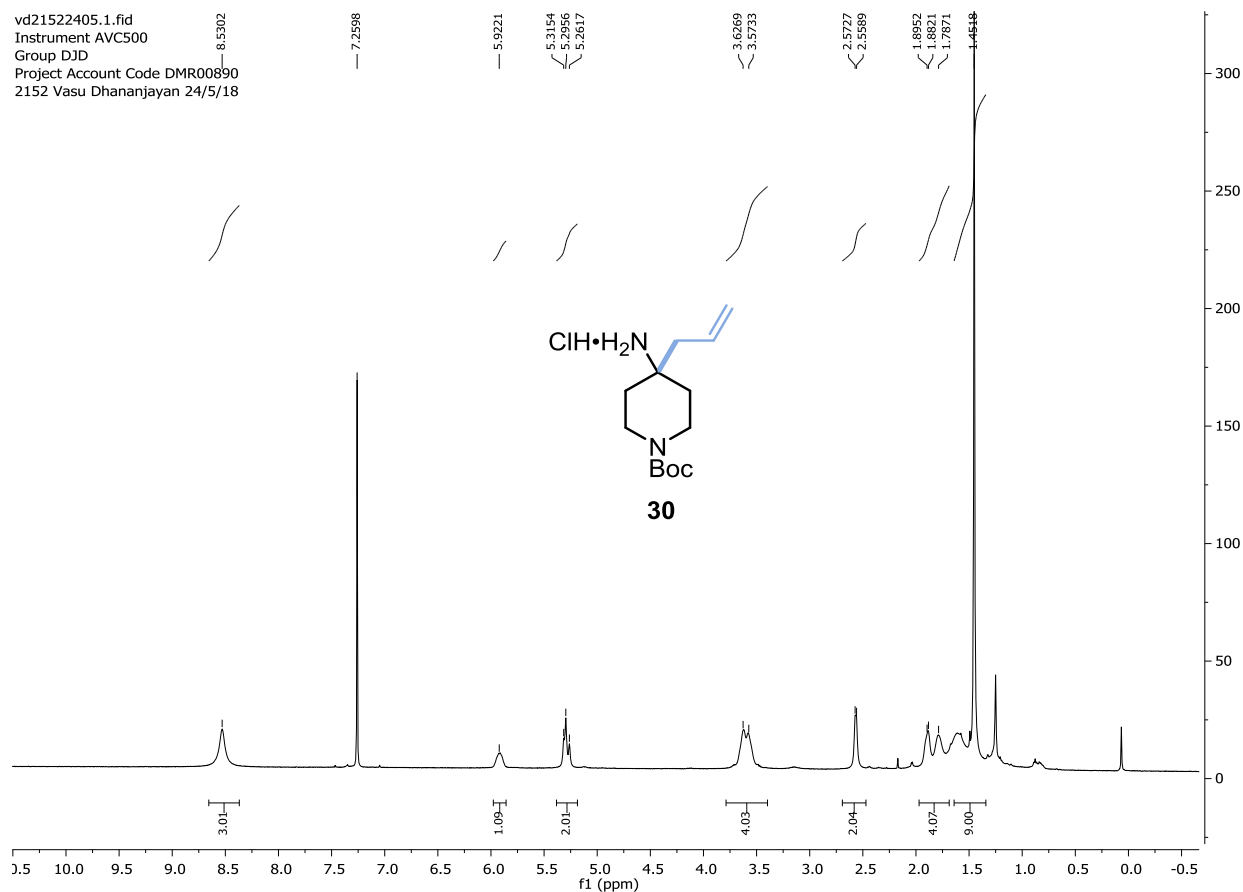

vd21522405.4.fid  
Instrument AVCS00  
Group DJD  
Project Account Code DMR00890  
2152 Vasu Dhananjayan 24/5/18

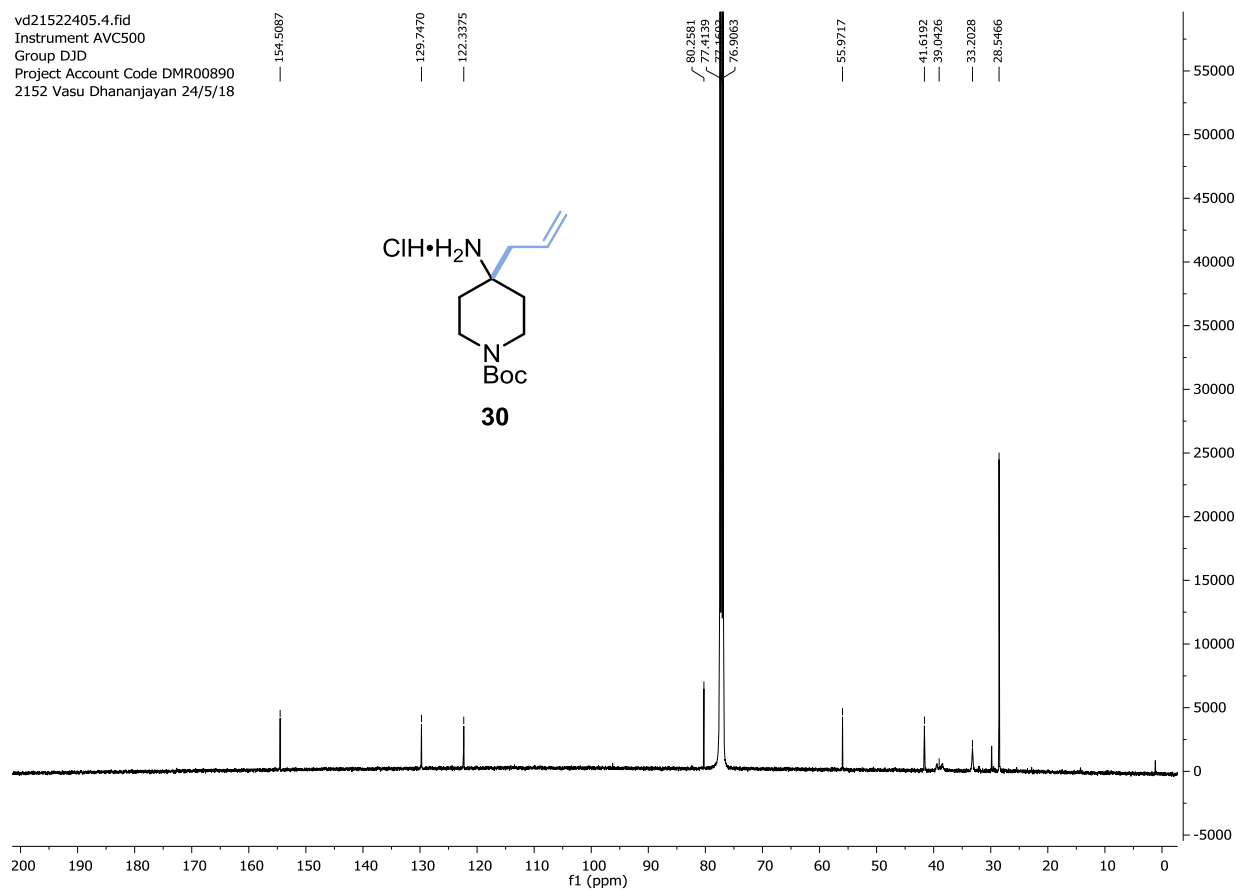

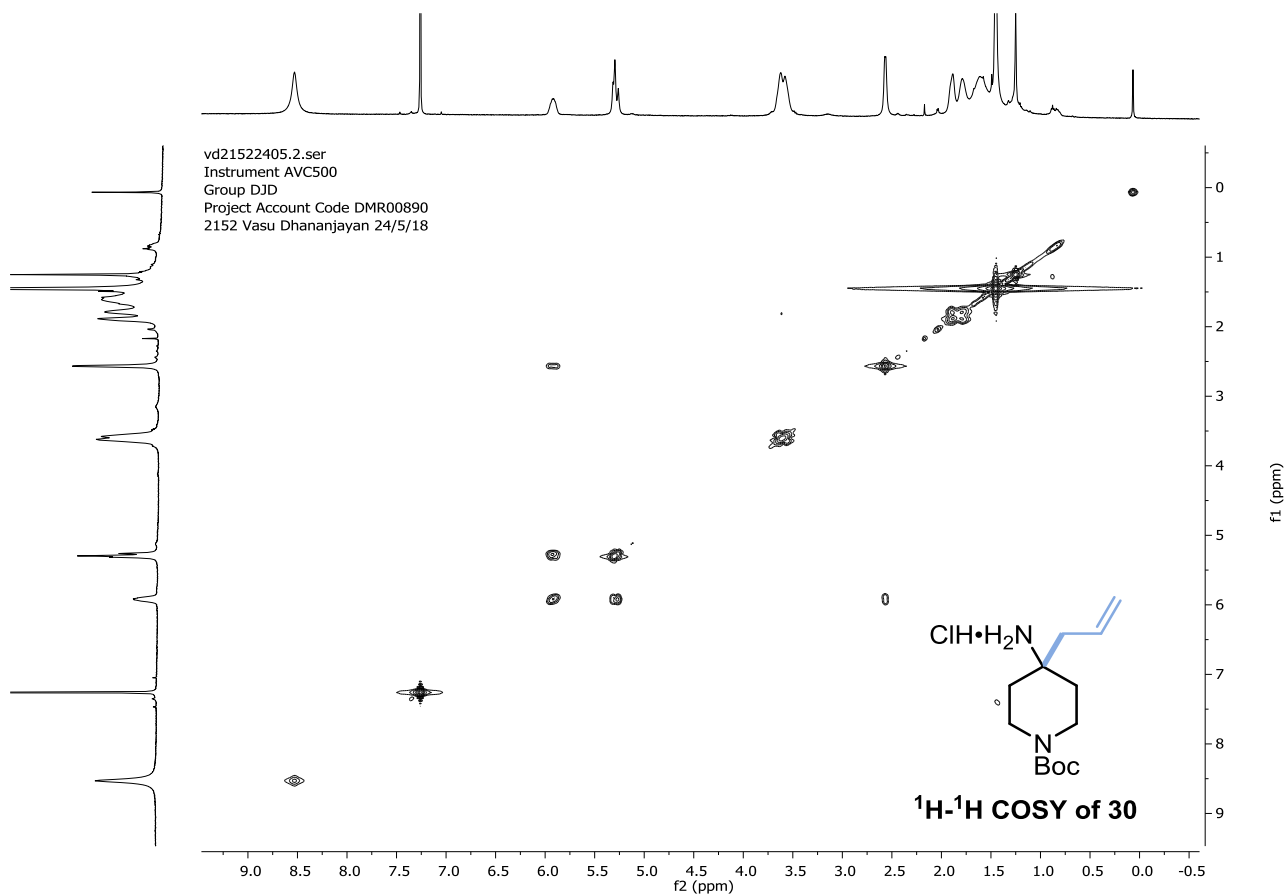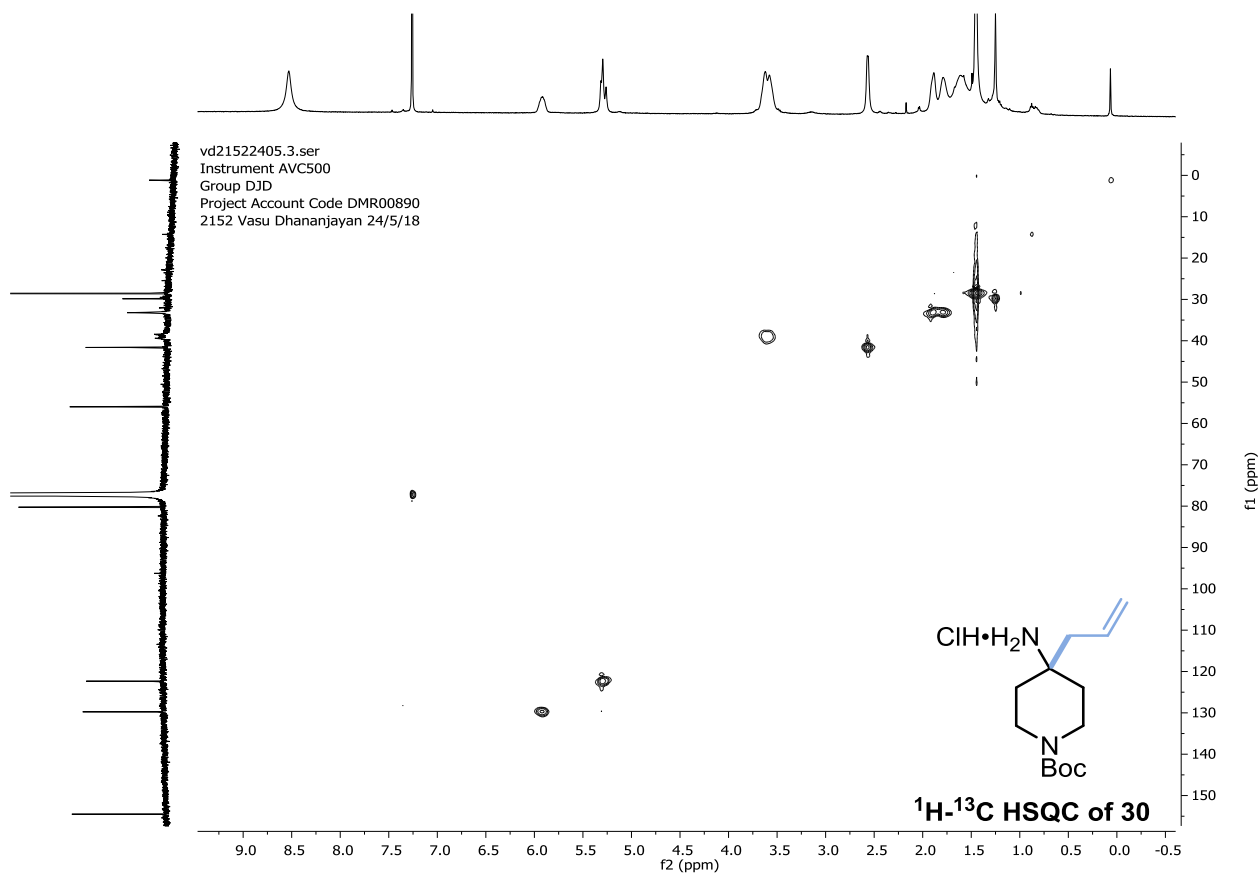

May24-2017-33-DV-408.1.f1  
 Instrument AVG400  
 Group DJD  
 Chemist Vasu  
 Project Account Code other  
 DV-408  
 h1acq.crl CDCl3 {C:\NMR} djgrp 33

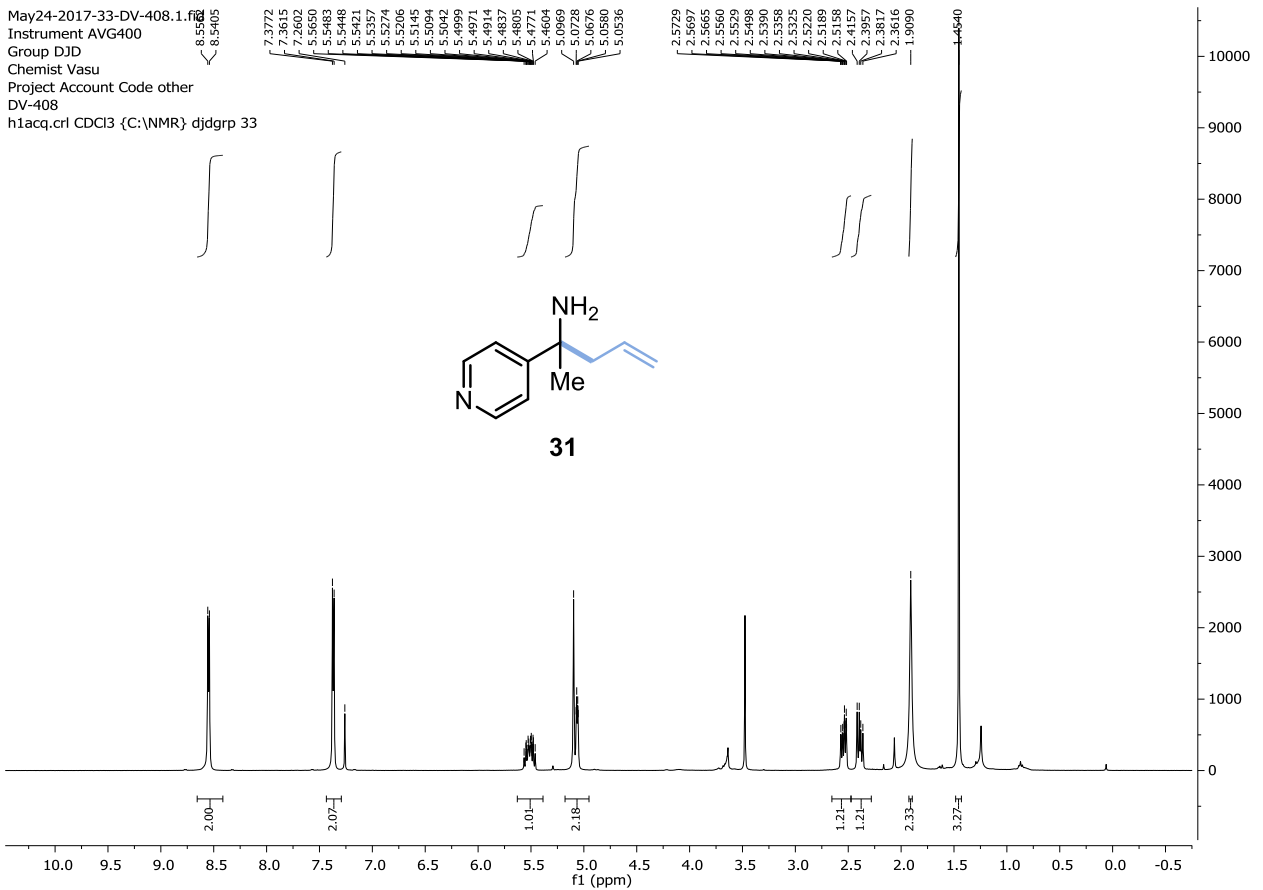

May24-2017-33-DV-408.2.f1  
 Instrument AVG400  
 Group DJD  
 Chemist Vasu  
 Project Account Code other  
 DV-408  
 c13acq.crl CDCl3 {C:\NMR} djgrp 33

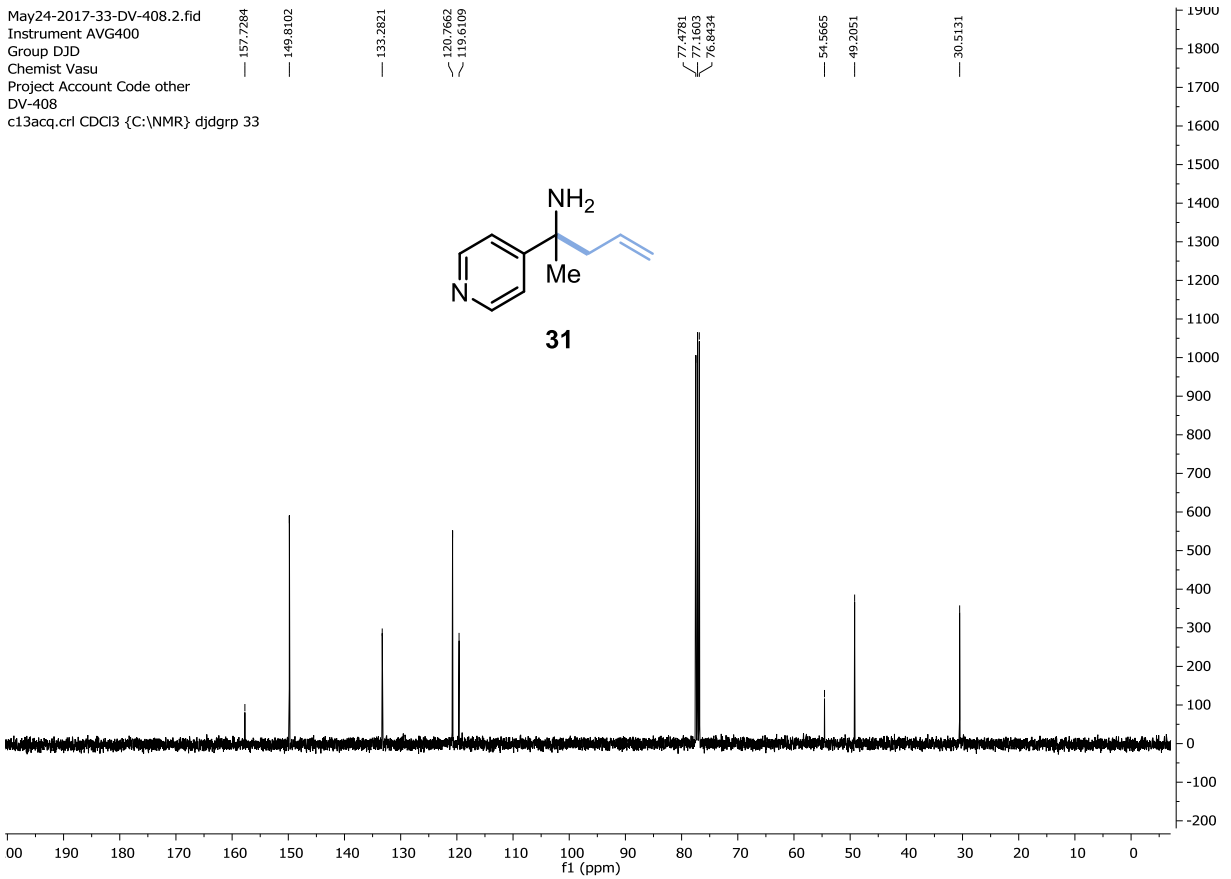

Sep29-2017-53-DV-492.1.fid  
Instrument AVH400  
Chemist Vasu  
Group DJD  
Project Account Code other  
DV-492  
h1acq.crl CDCl3 {C:\NMR} djgrp 53

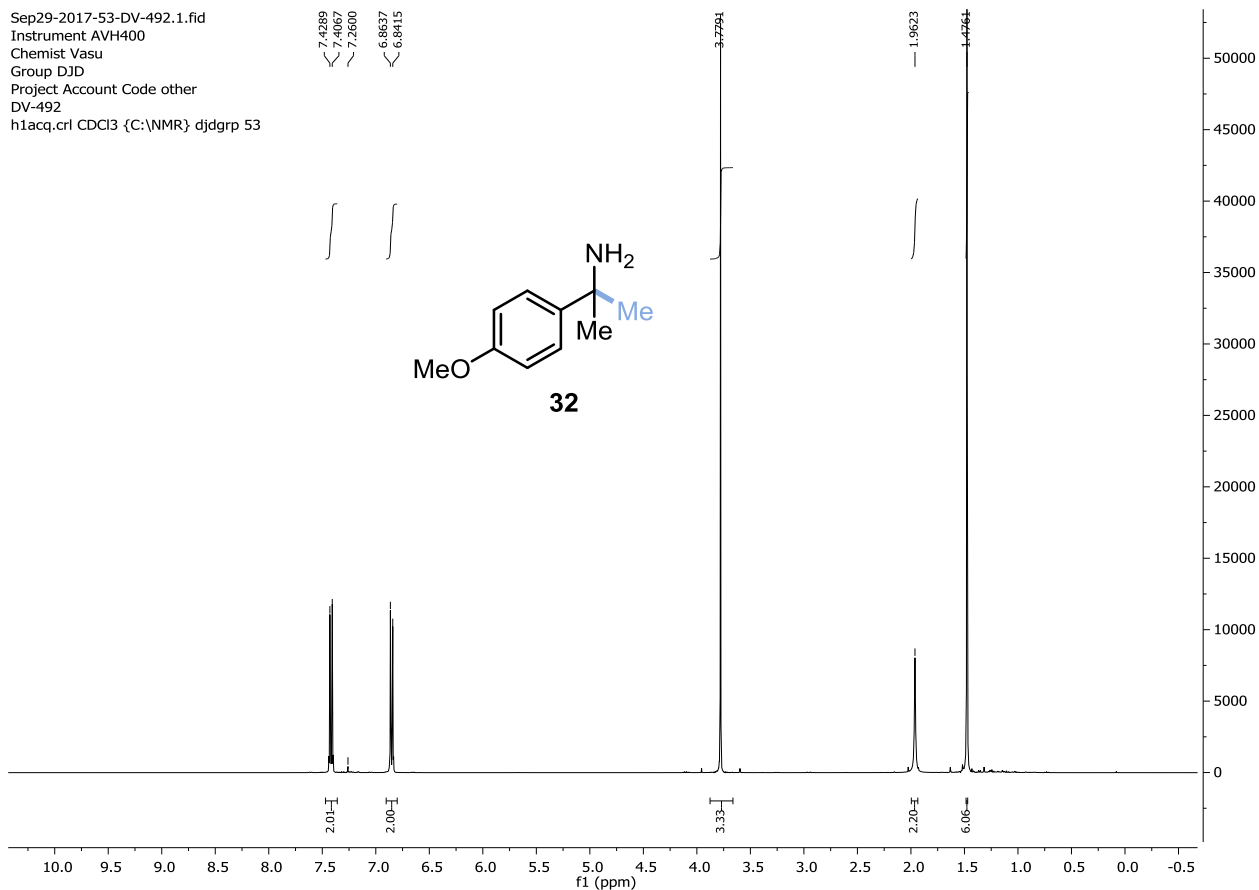

Sep29-2017-53-DV-492.2.fid  
Instrument AVH400  
Chemist Vasu  
Group DJD  
Project Account Code other  
DV-492  
c13acq.crl CDCl3 {C:\NMR} djgrp 53

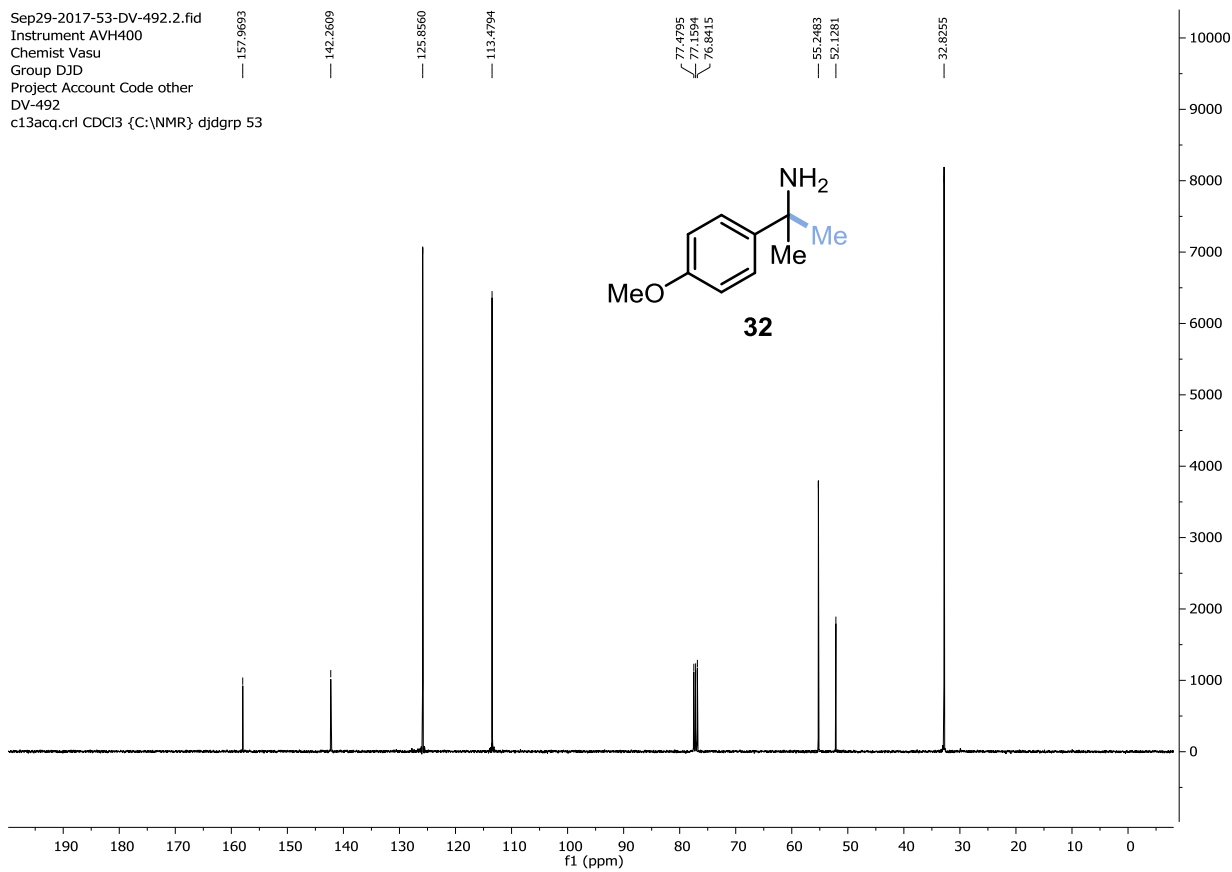

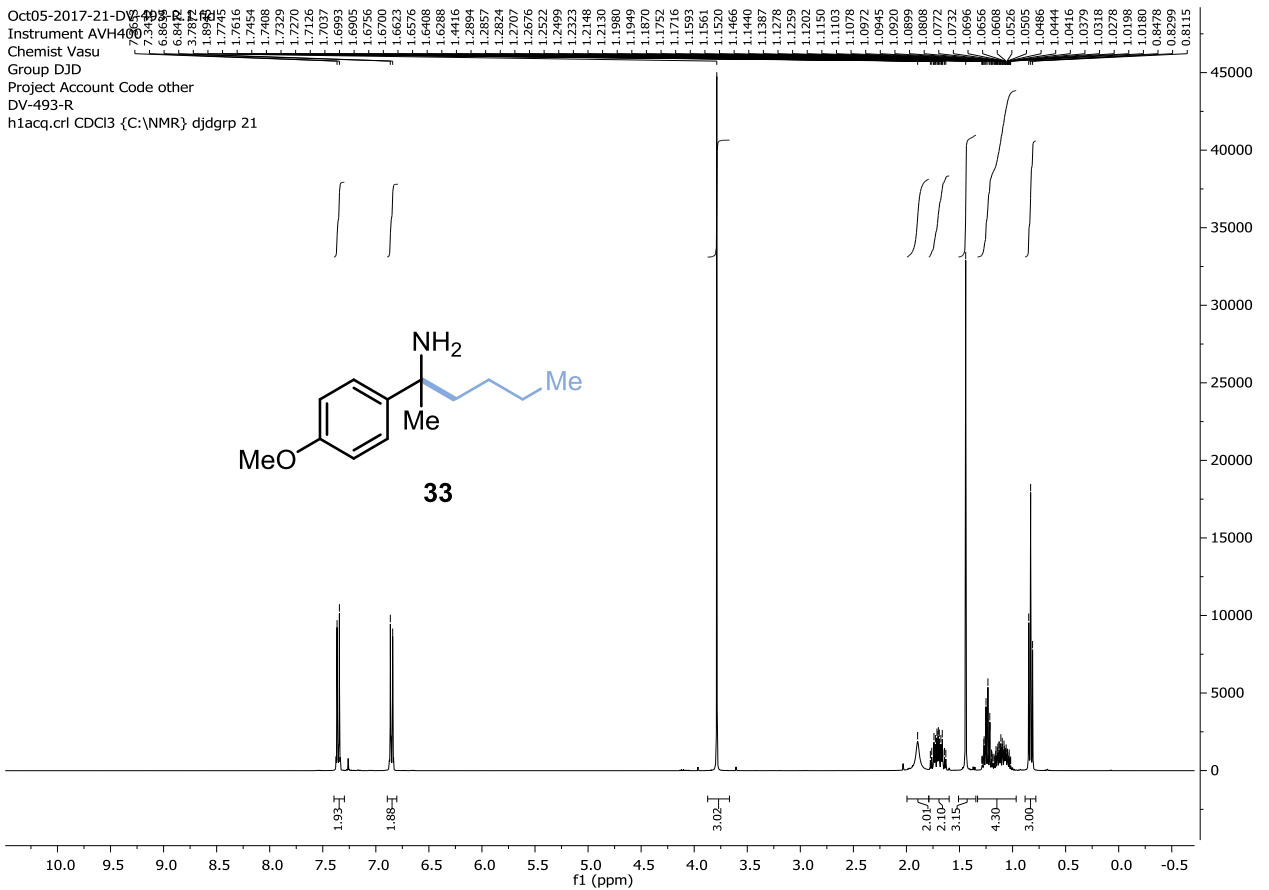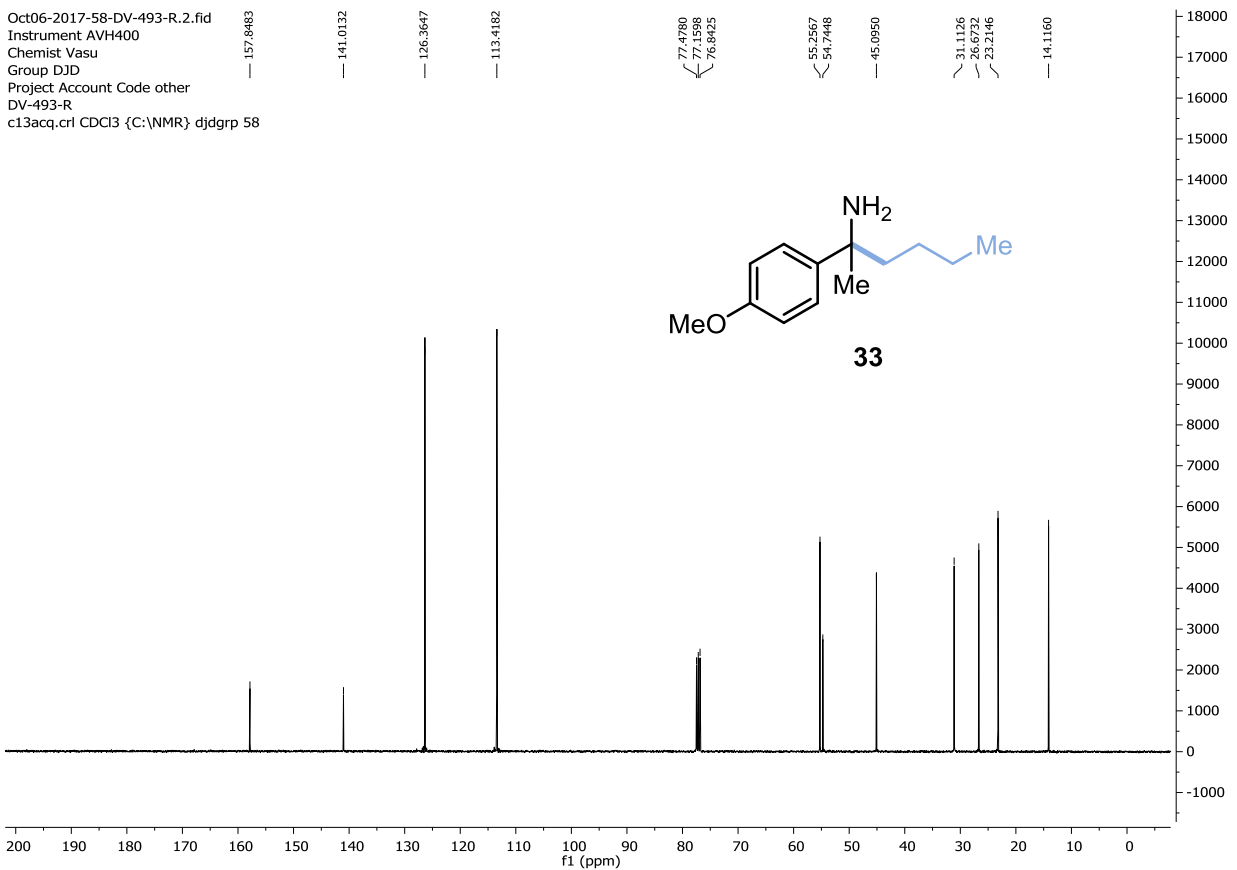

Oct04-2017-36-DV-494.1.fid  
 Instrument AVH400  
 Chemist Vasu  
 Group DJD  
 Project Account Code other  
 DV-494  
 h1acq.crl CDCl3 {C:\NMR} djgrp 36

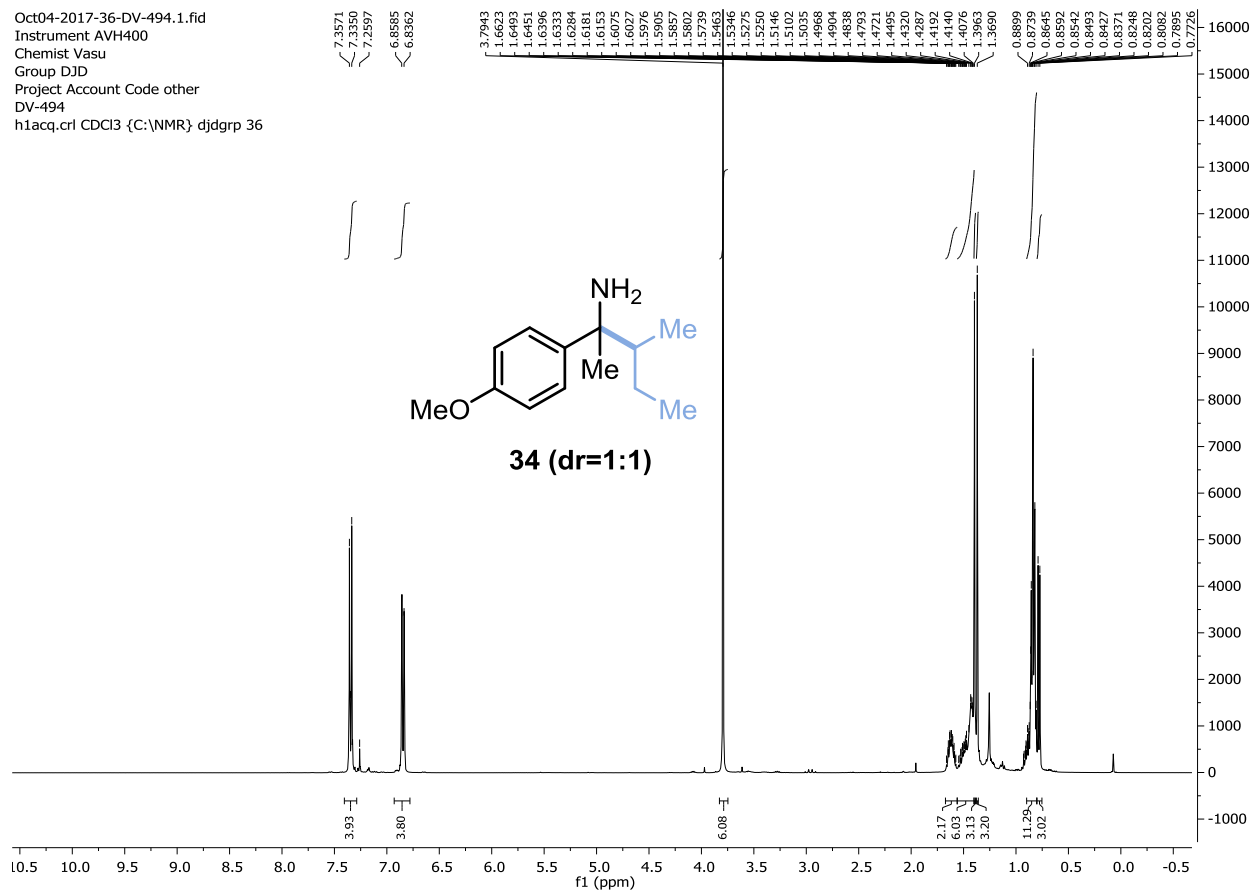

Oct04-2017-36-DV-494.2.fid  
 Instrument AVH400  
 Chemist Vasu  
 Group DJD  
 Project Account Code other  
 DV-494  
 c13acq.crl CDCl3 {C:\NMR} djgrp 36

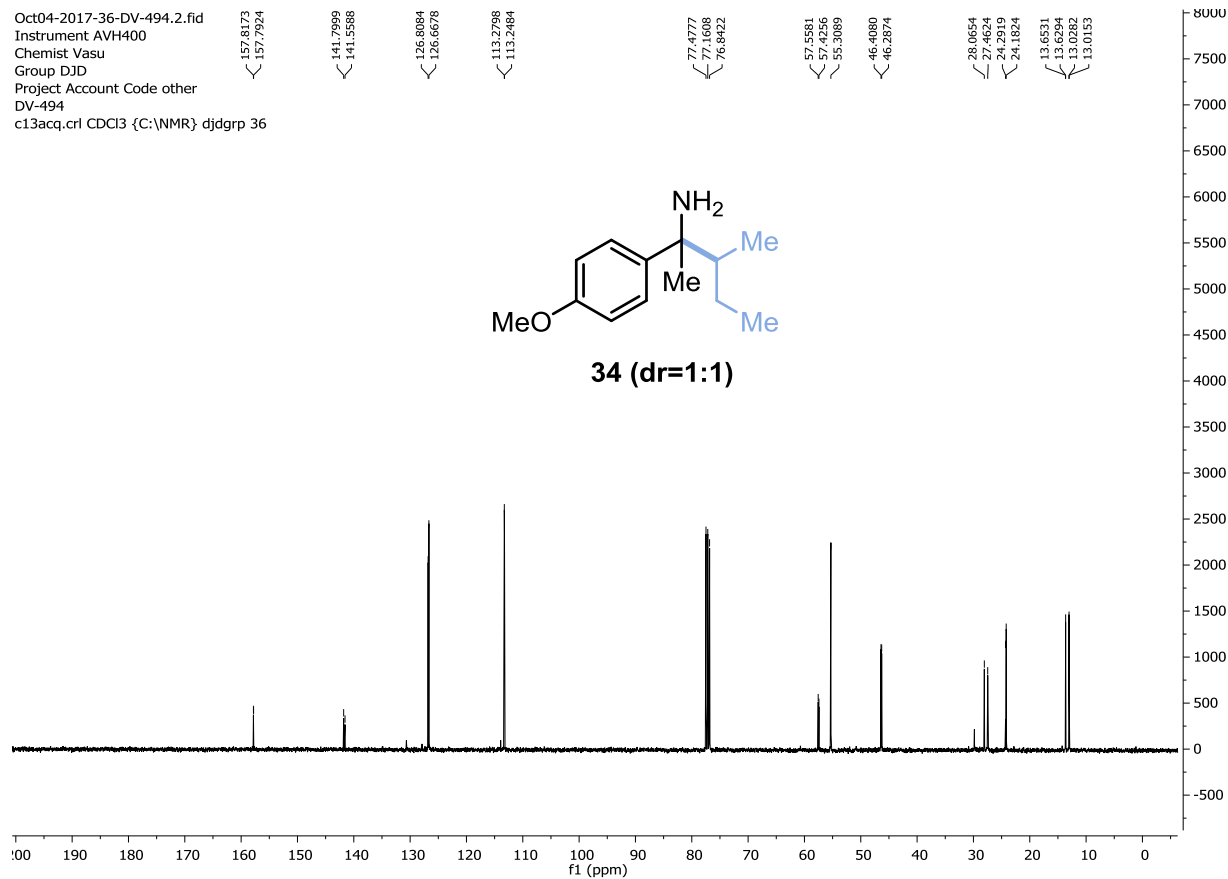



Oct13-2017-34-DV-499-HCl.1.fid  
Instrument AVH400  
Chemist Vasu  
Group DJD  
Project Account Code other  
DV-499-HCl  
h1acq.crl CDCl3 {C:\NMR} djdgrp 34

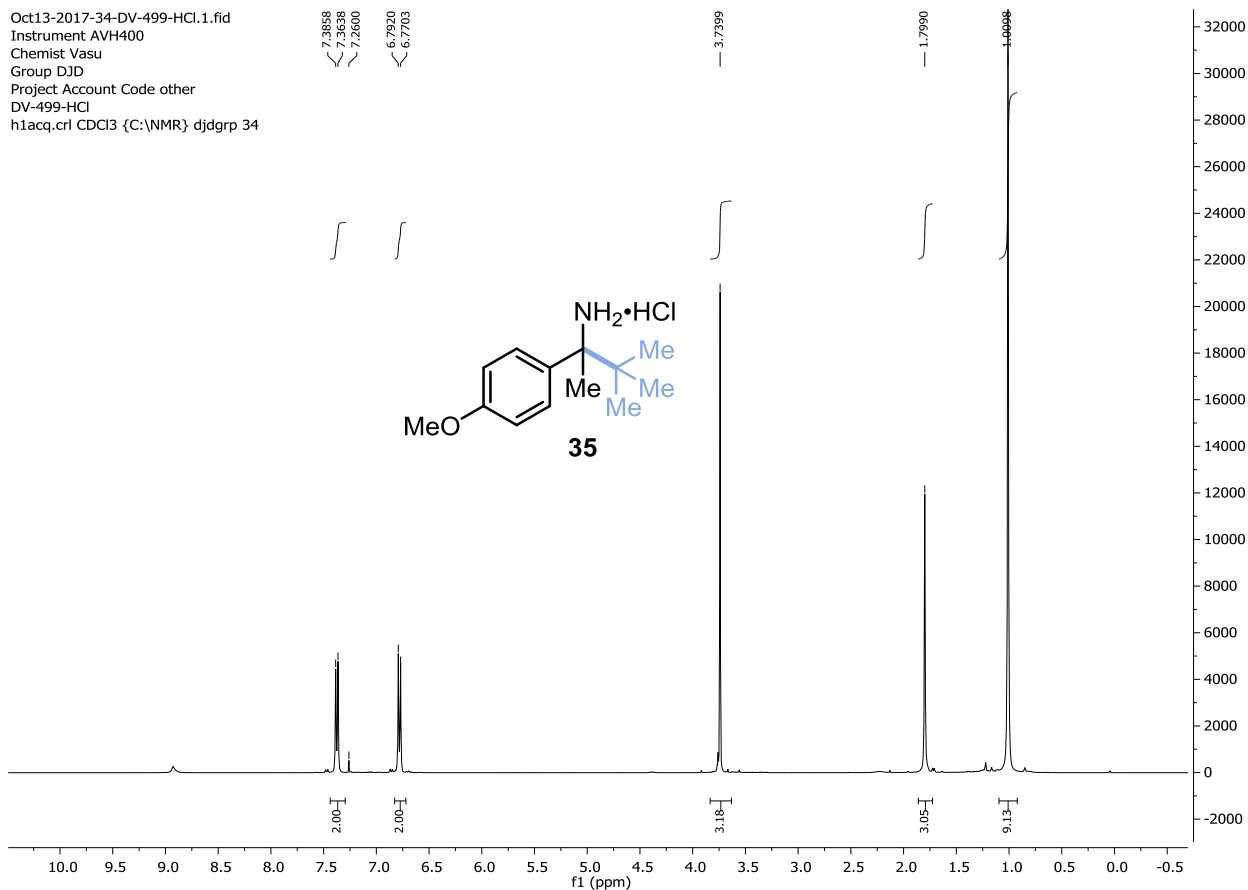

Oct13-2017-34-DV-499-HCl.2.fid  
Instrument AVH400  
Chemist Vasu  
Group DJD  
Project Account Code other  
DV-499-HCl  
c13acq.crl CDCl3 {C:\NMR} djdgrp 34

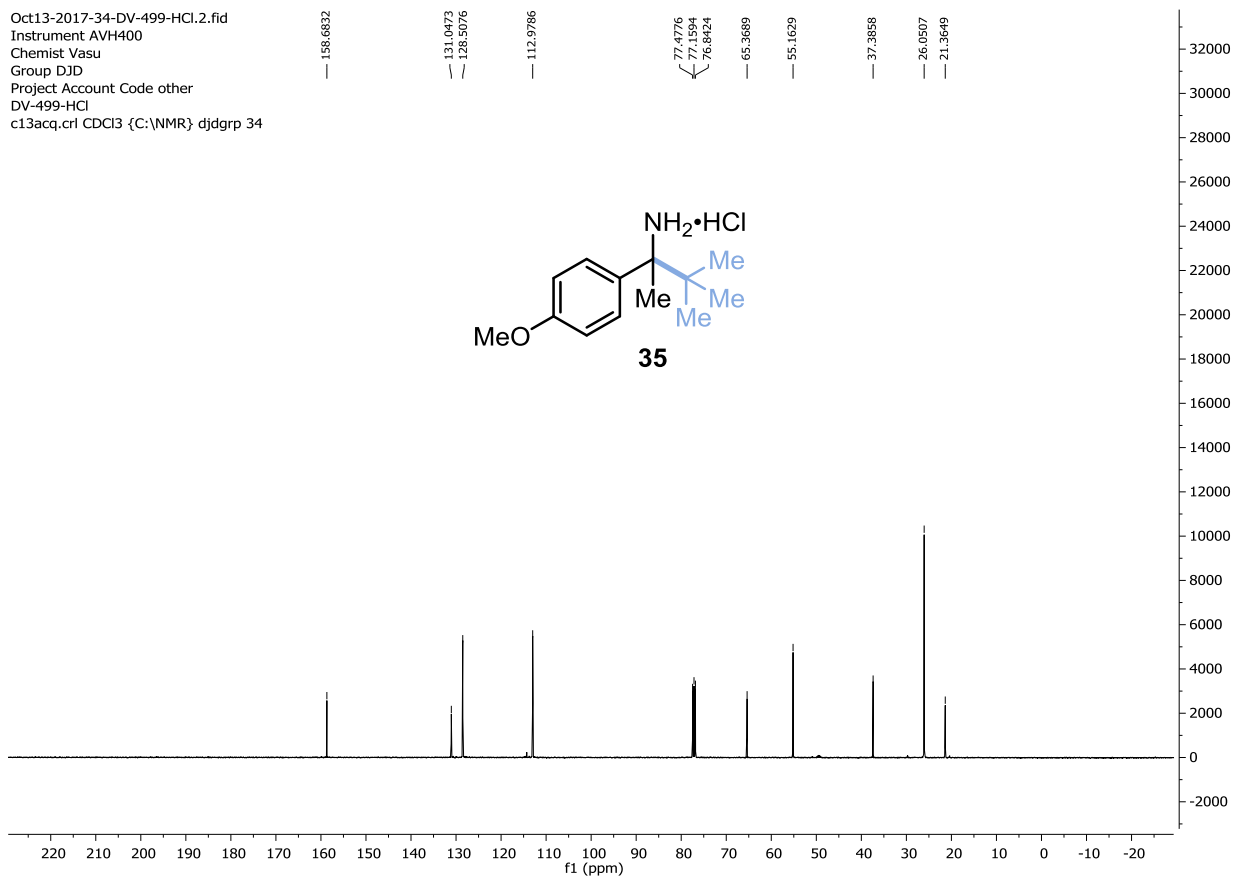

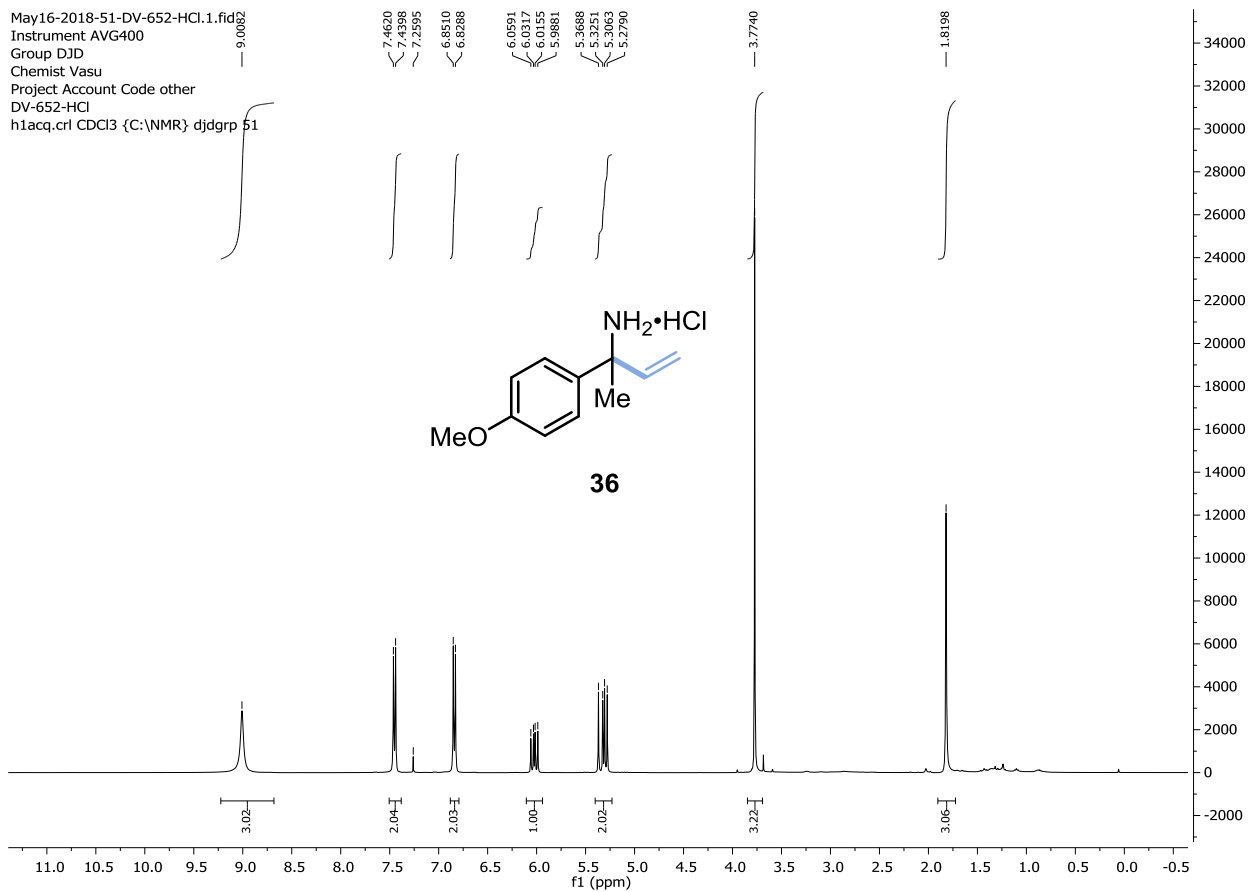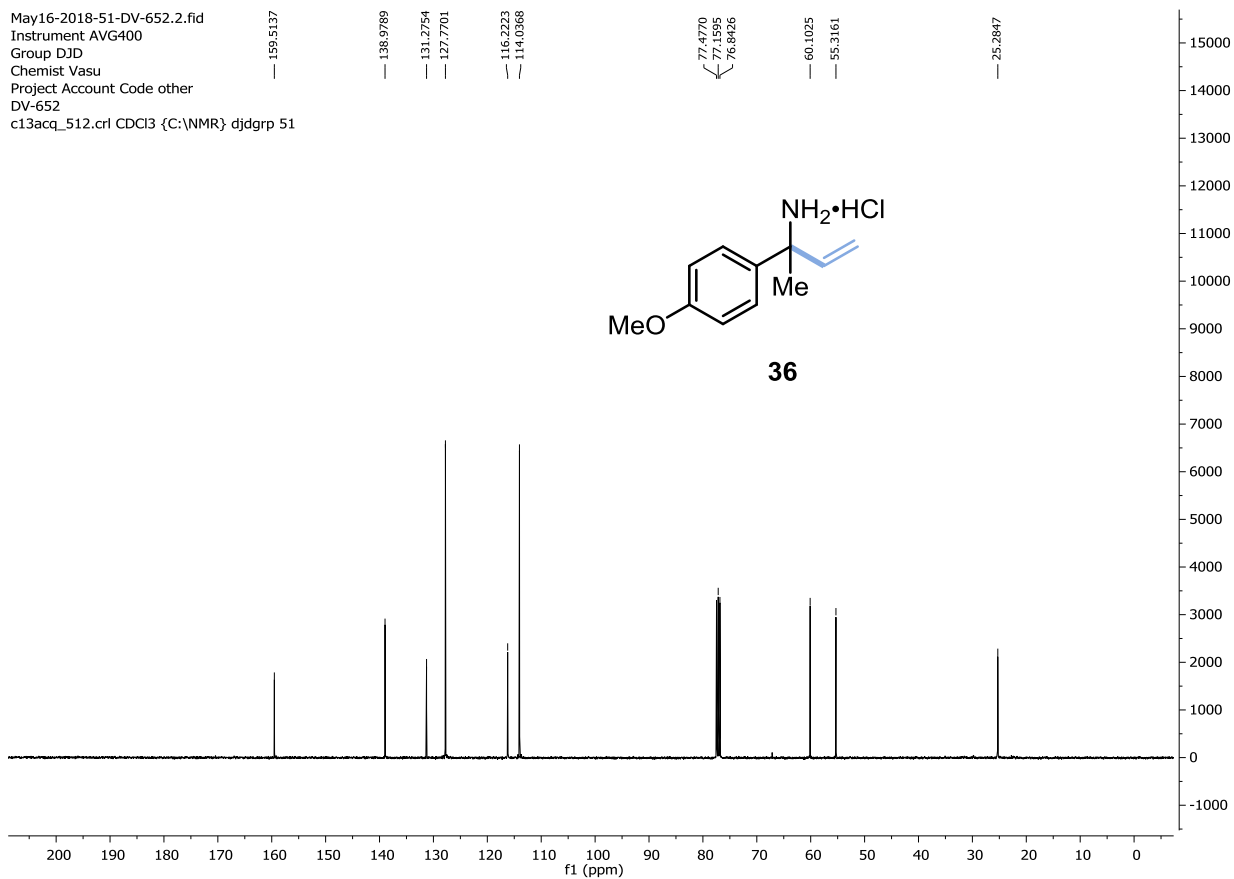

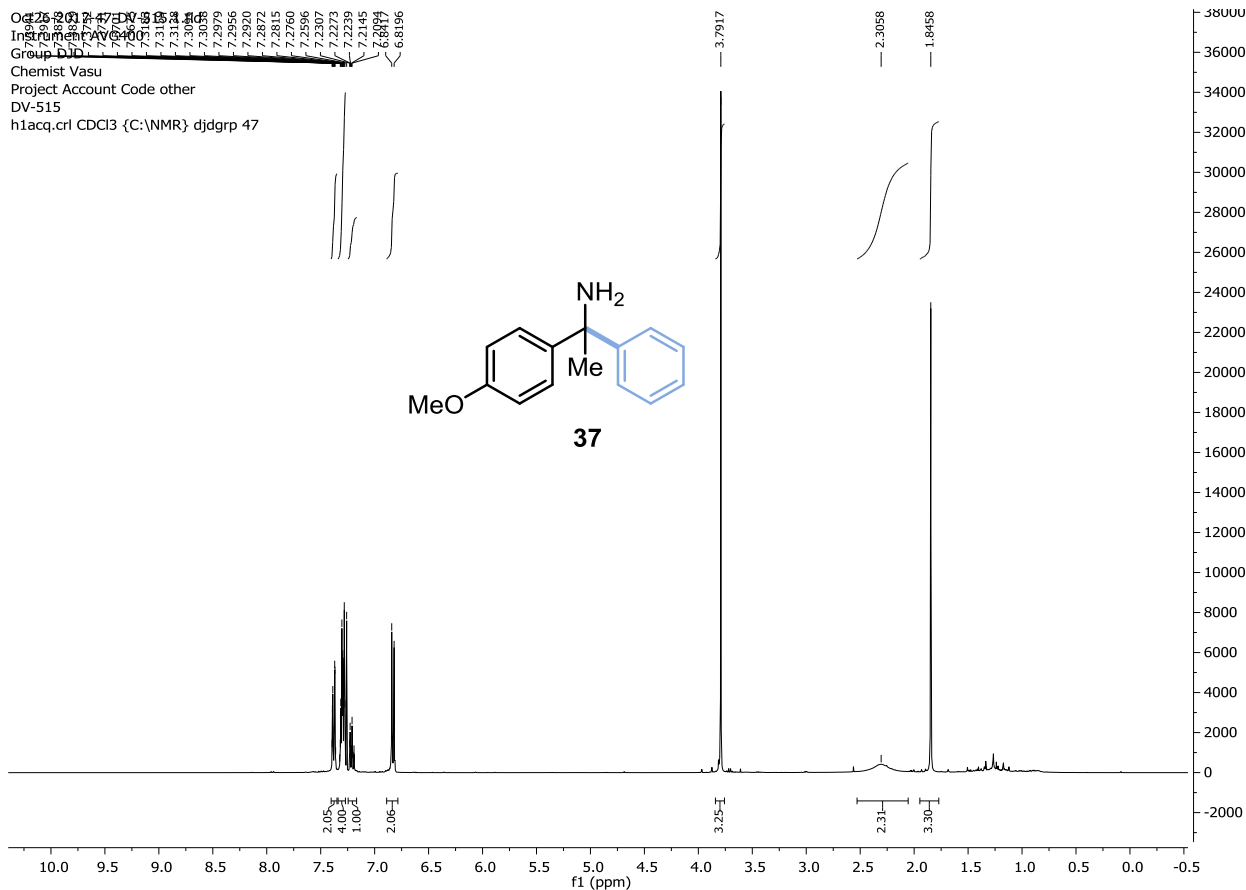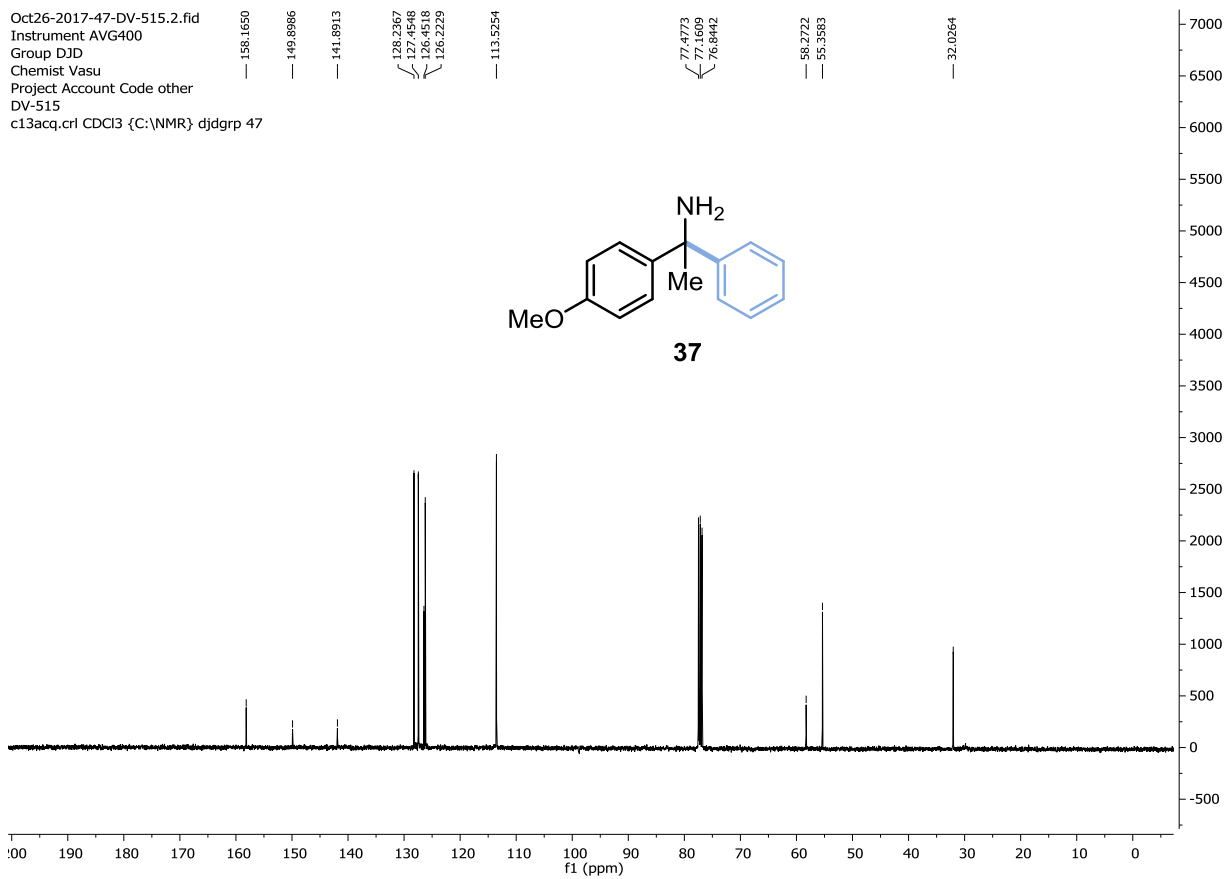

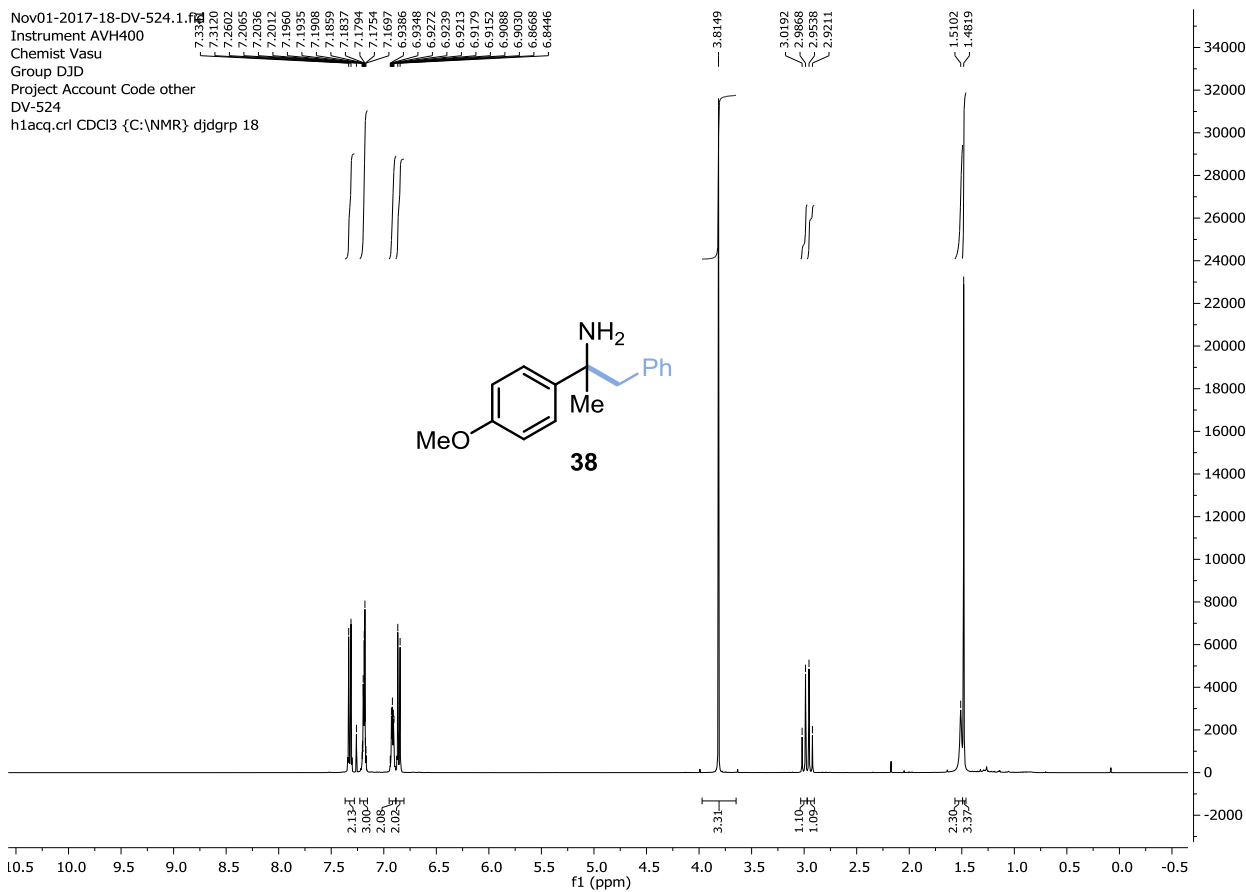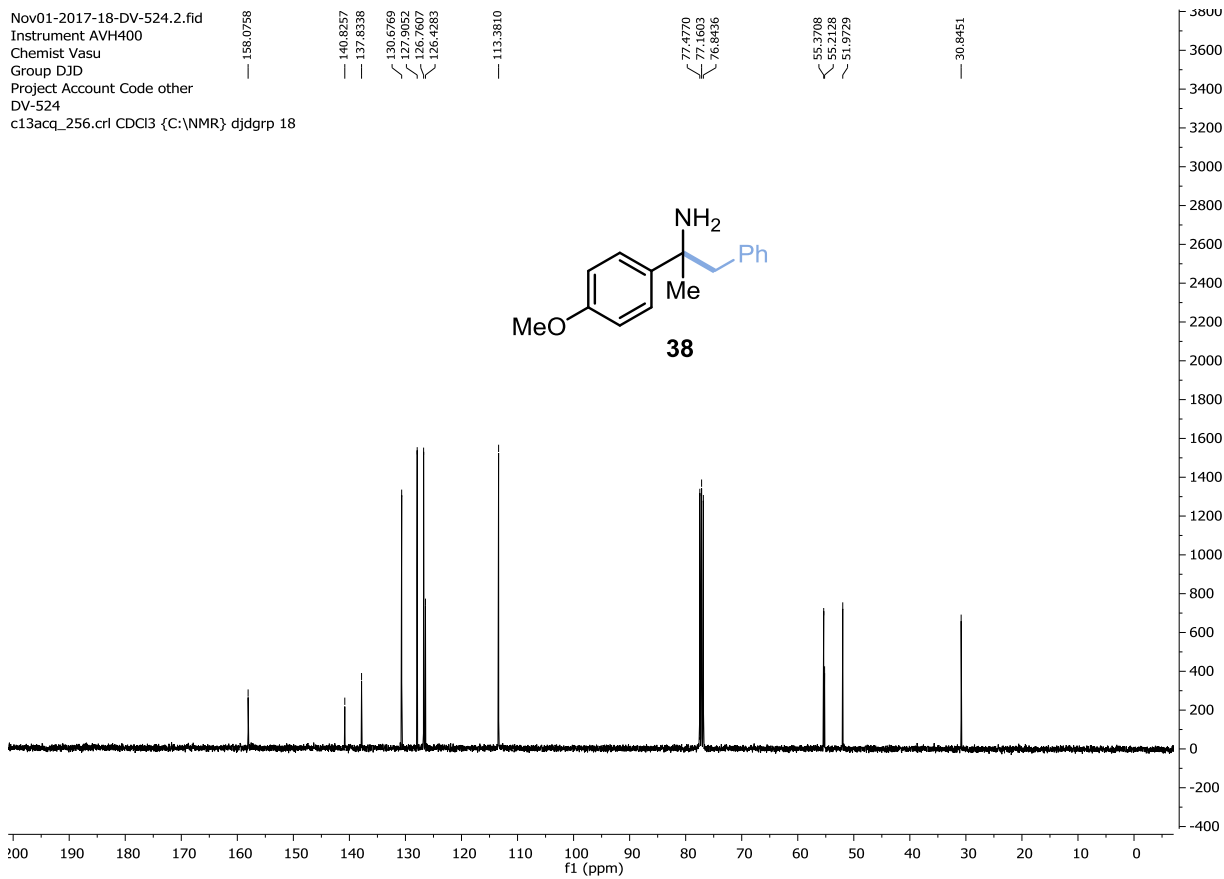

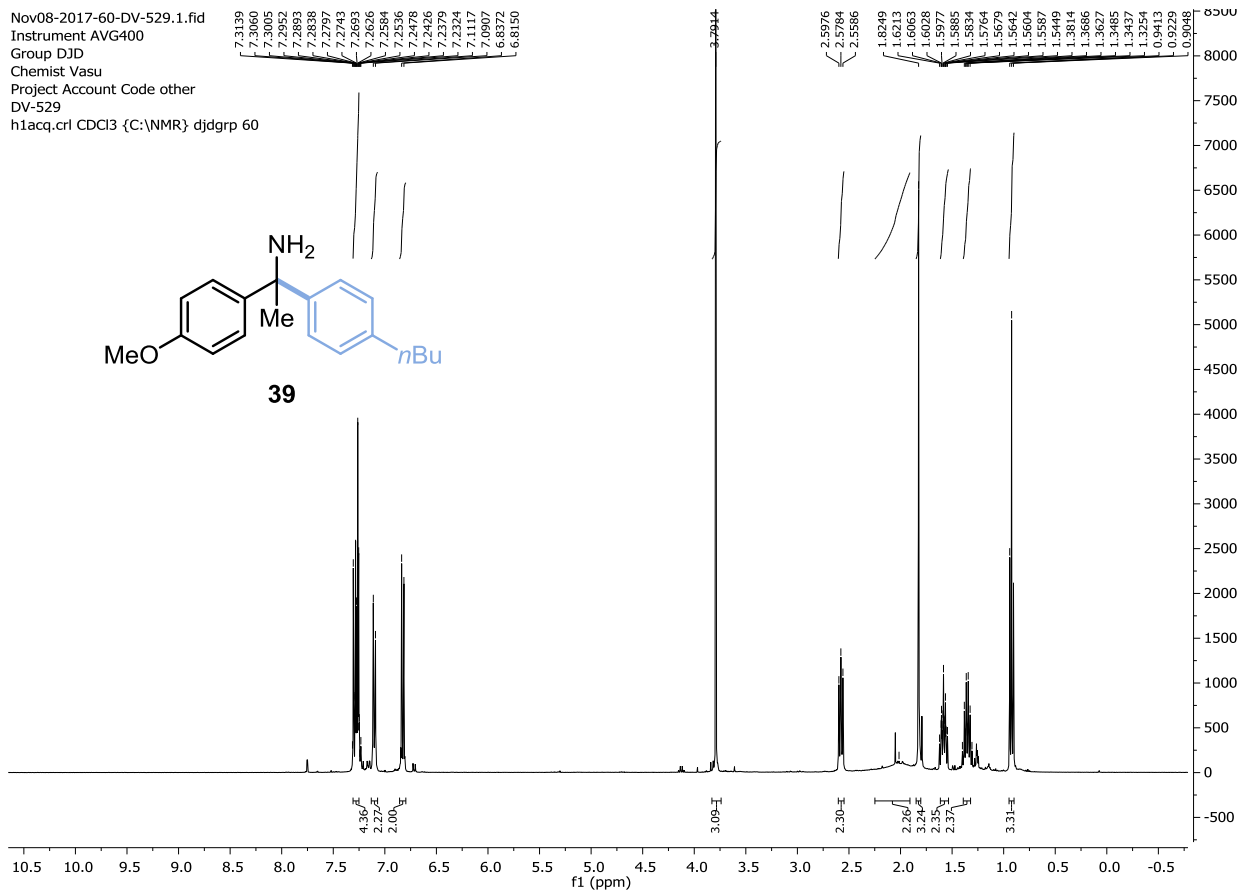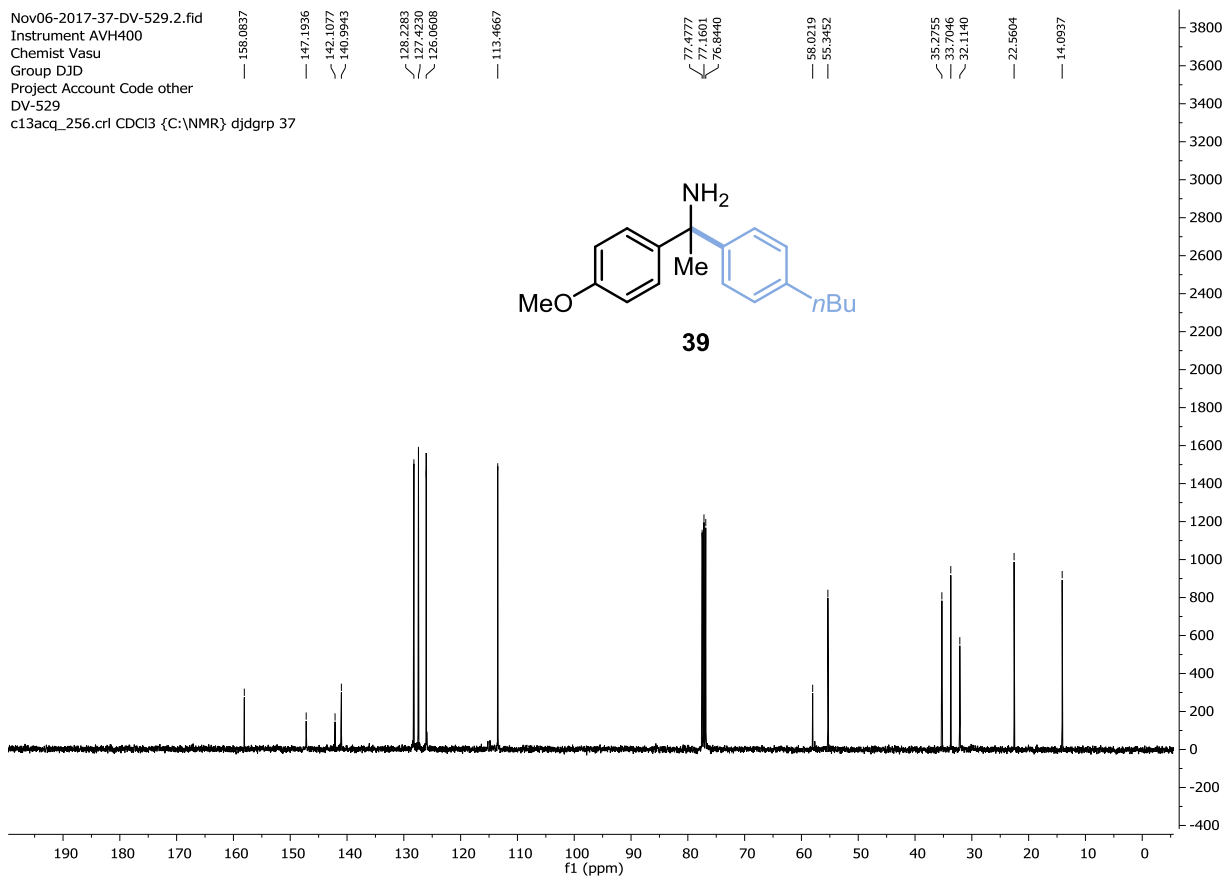

Feb01-2018-8-DV-533-1.1.fid  
 Instrument AVG400  
 Group DJD  
 Chemist Vasu  
 Project Account Code other  
 DV-533-1  
 h1acq.crl CD2Cl2 {C:\NMR} djmgrp 8

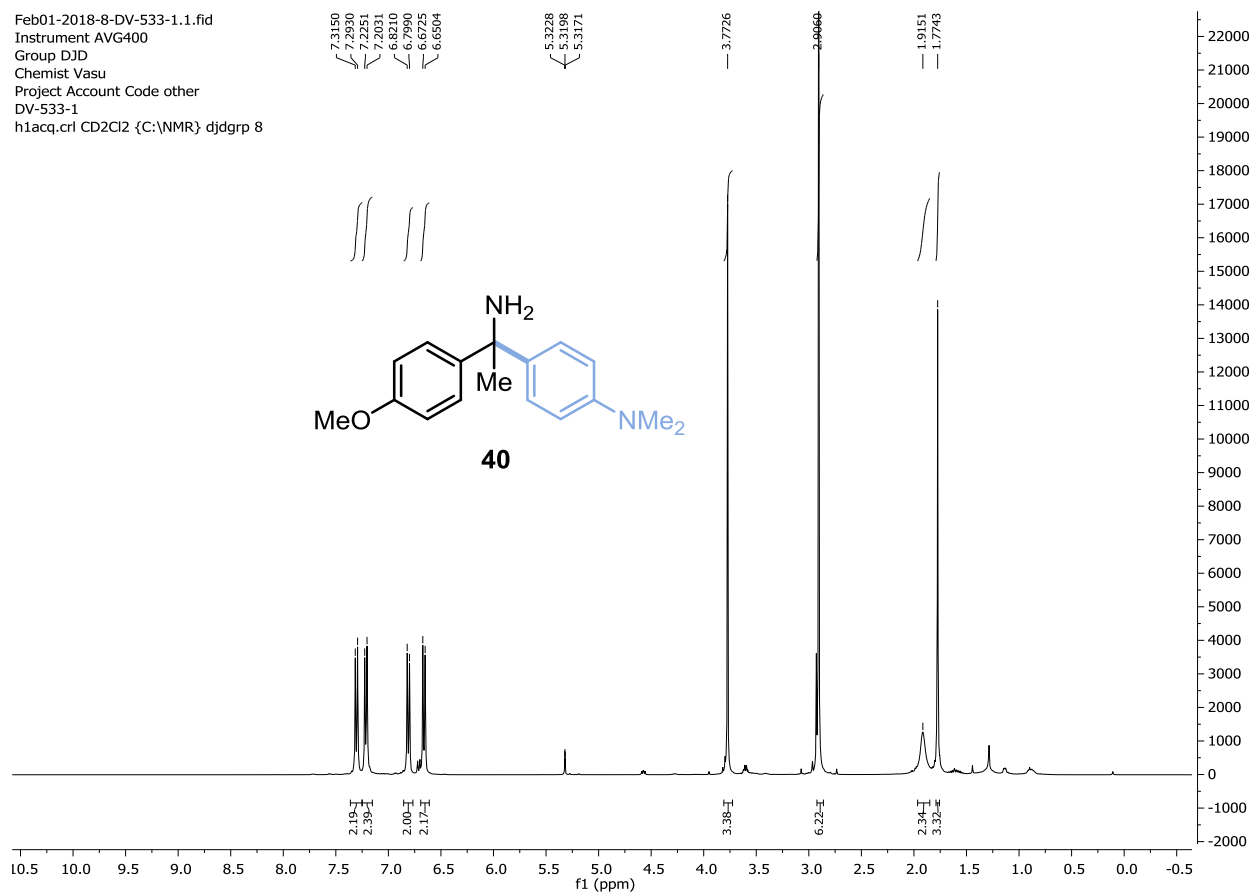

Feb01-2018-8-DV-533-1.2.fid  
 Instrument AVG400  
 Group DJD  
 Chemist Vasu  
 Project Account Code other  
 DV-533-1  
 c13acq\_256.crl CD2Cl2 {C:\NMR} djmgrp 8

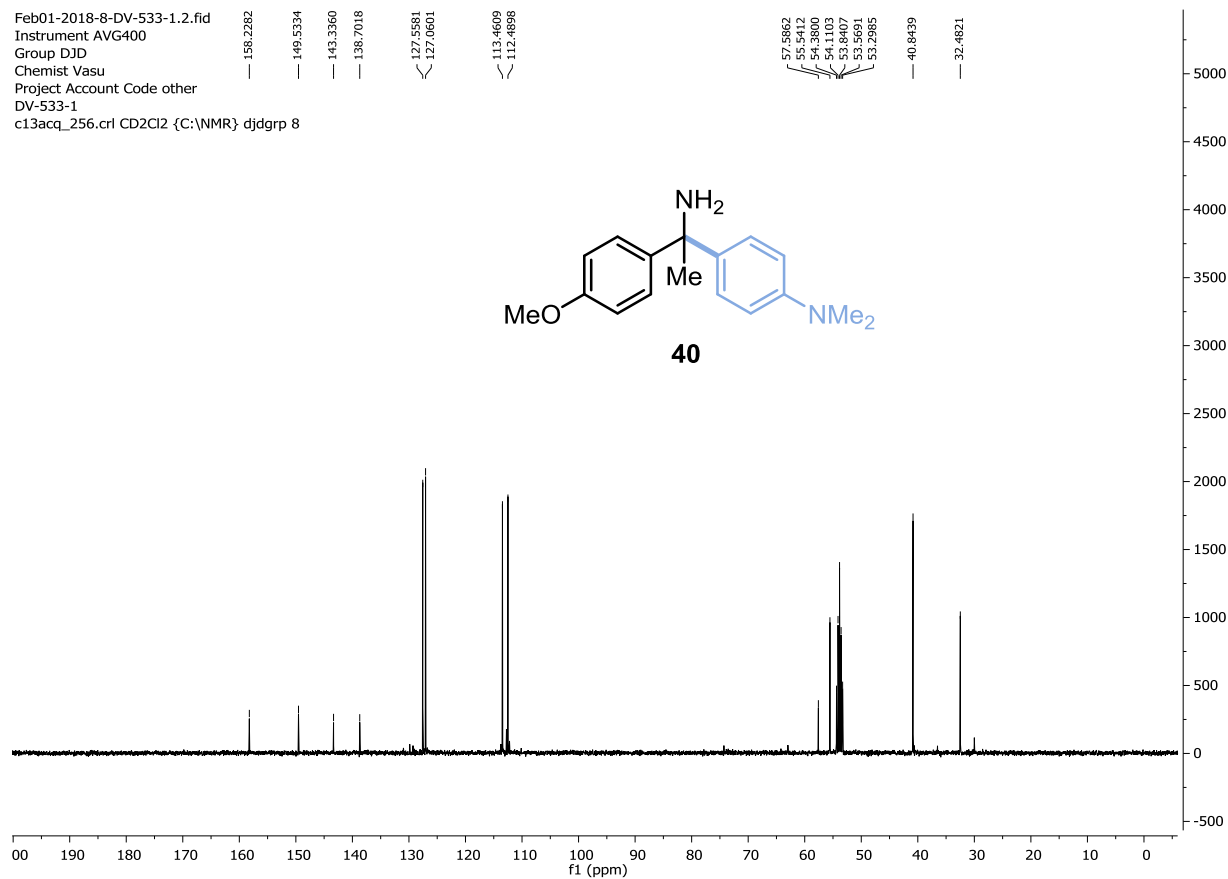

Nov24-2017-26-DV-532.1.fid  
Instrument AVH400  
Chemist Vasu  
Group DJD  
Project Account Code other  
DV-532  
h1acq.crl CDCl3 {C:\NMR} djgrp 26

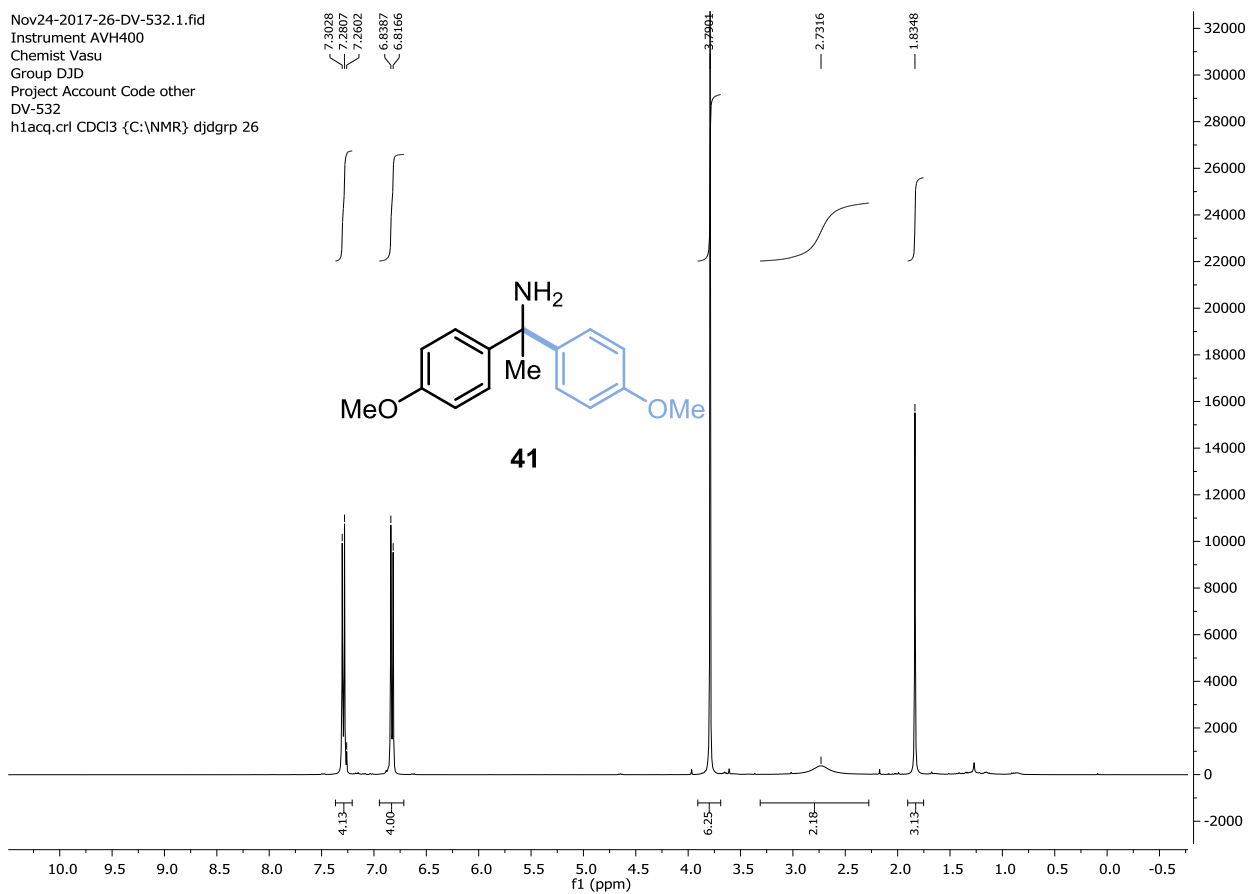

Nov24-2017-26-DV-532.2.fid  
Instrument AVH400  
Chemist Vasu  
Group DJD  
Project Account Code other  
DV-532  
c13acq\_256.crl CDCl3 {C:\NMR} djgrp 26

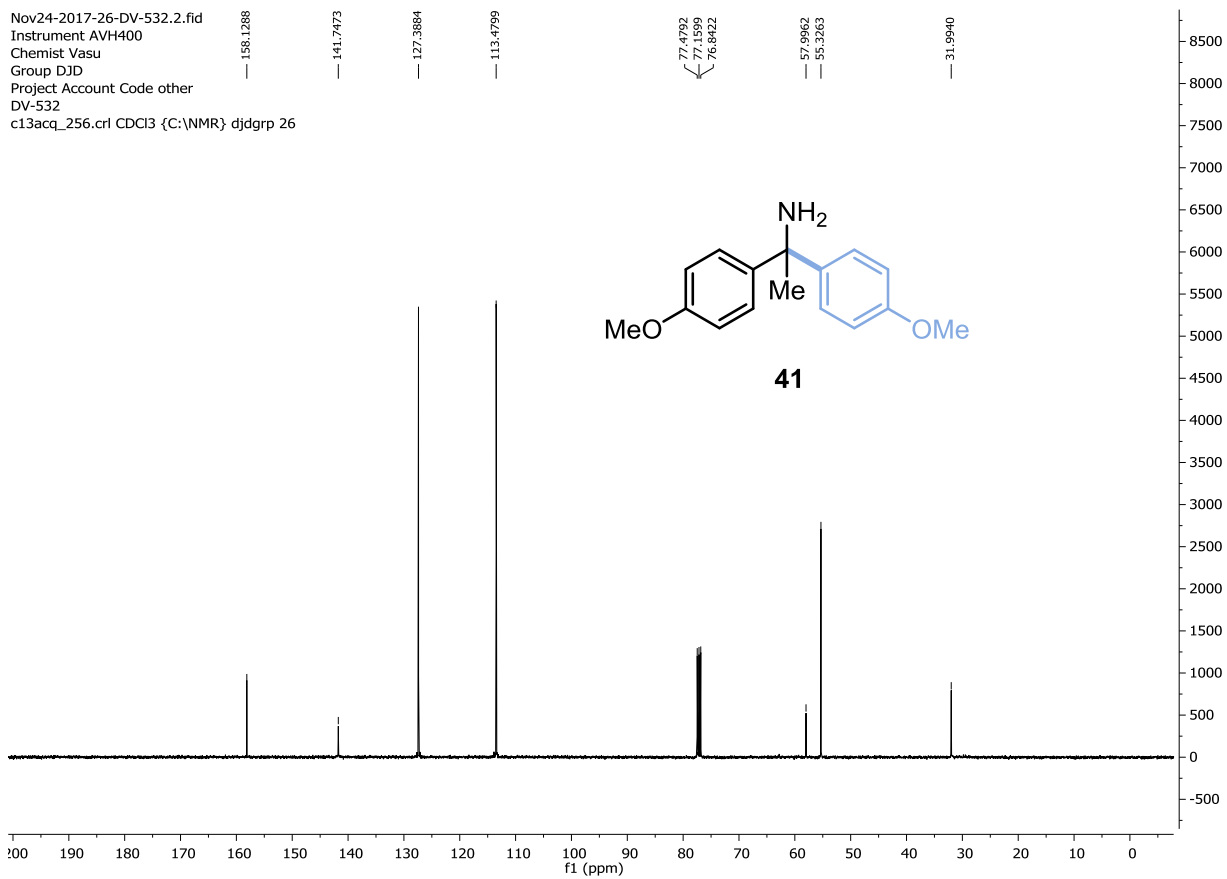

Nov01-2017-53-DV-523.1.fid  
 Instrument AVH400  
 Chemist Vasu  
 Group DJD  
 Project Account Code other  
 DV-523  
 h13acq.crl CDCl3 {C:\NMR} djgrp 53

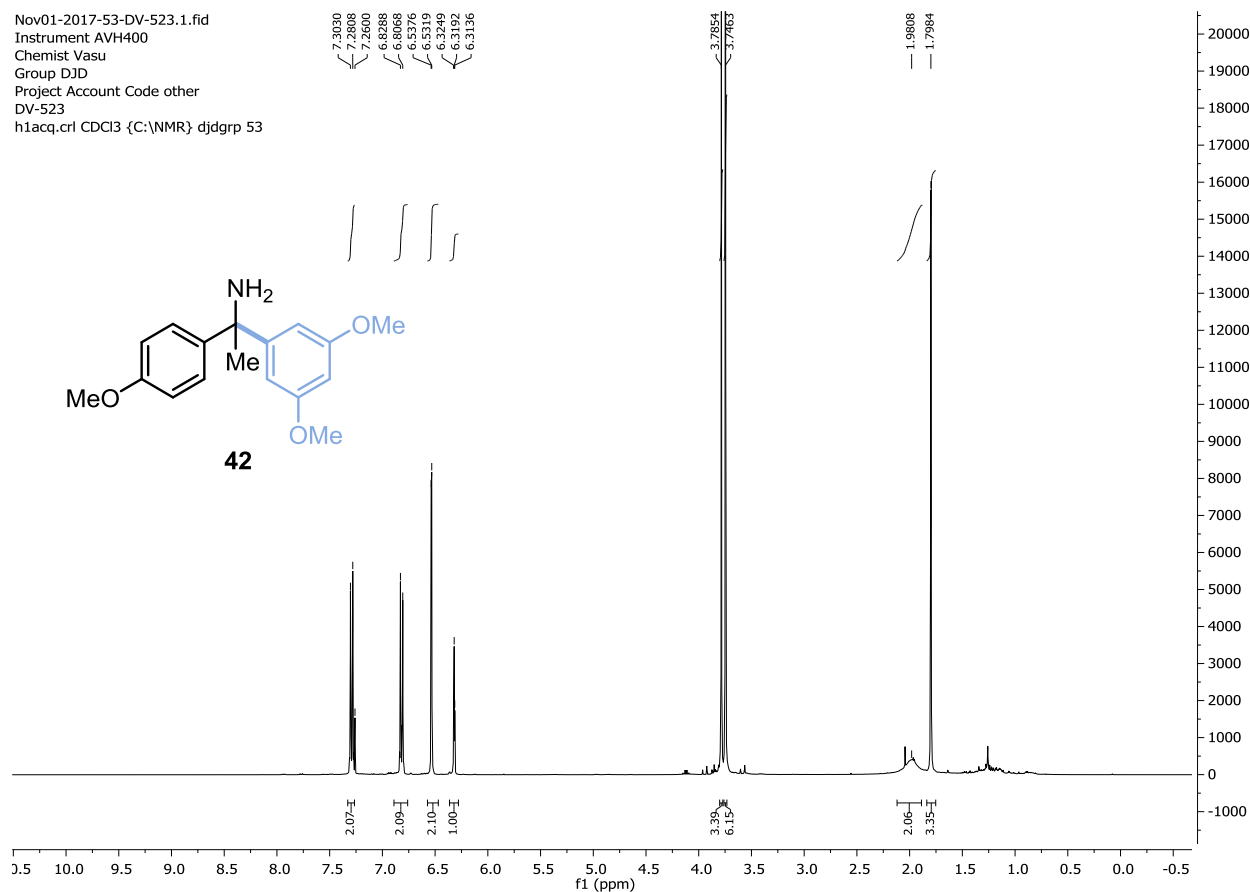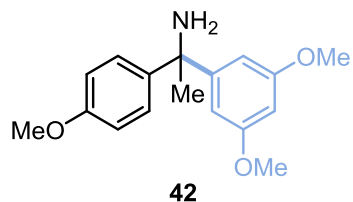

Nov01-2017-53-DV-523.2.fid  
 Instrument AVH400  
 Chemist Vasu  
 Group DJD  
 Project Account Code other  
 DV-523  
 c13acq\_256.crl CDCl3 {C:\NMR} djgrp 53

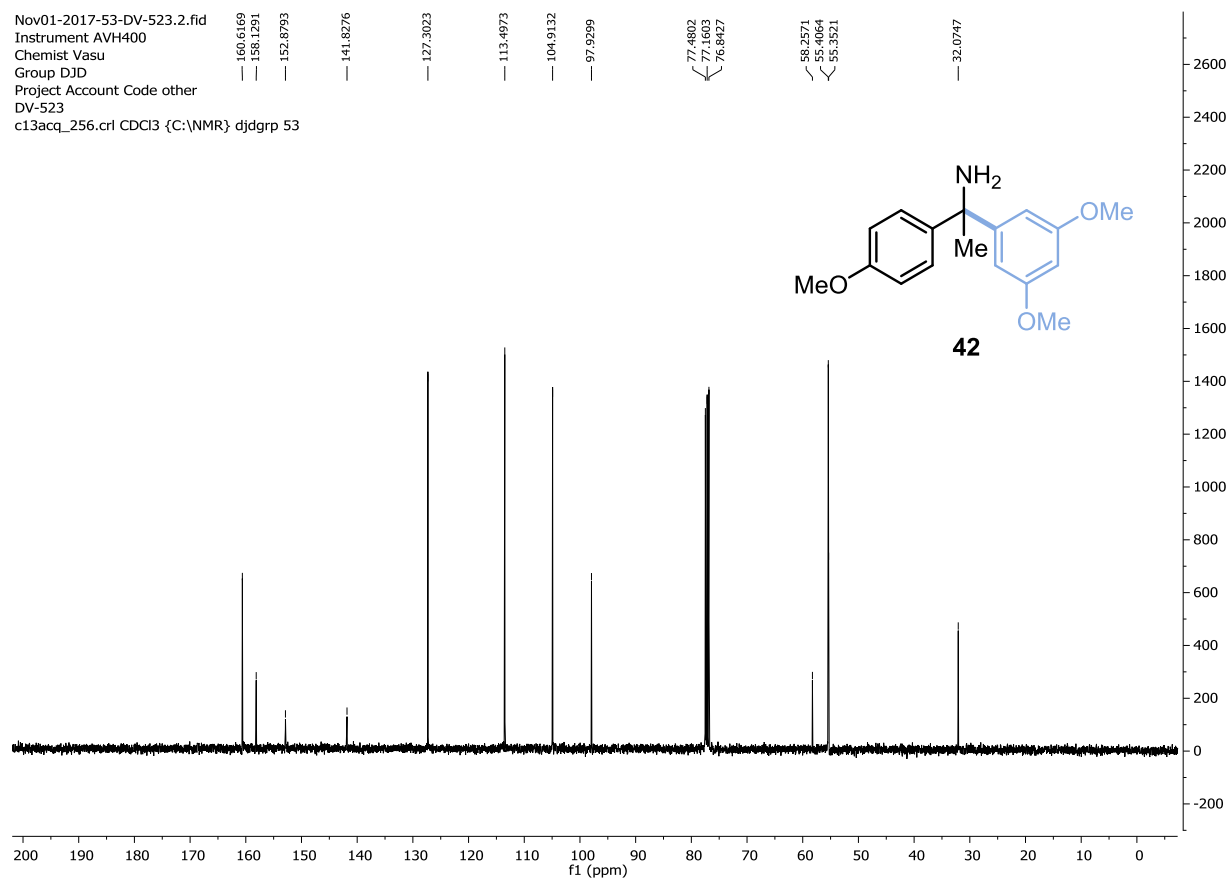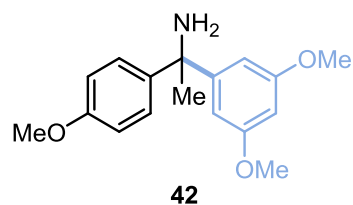



Nov09-2017-7-DV-531.1.fid  
Instrument AVH400  
Chemist Vasu  
Group DJD  
Project Account Code other  
DV-531  
h1acq.crl CDCl3 {C:\NMR} djmgrp 7

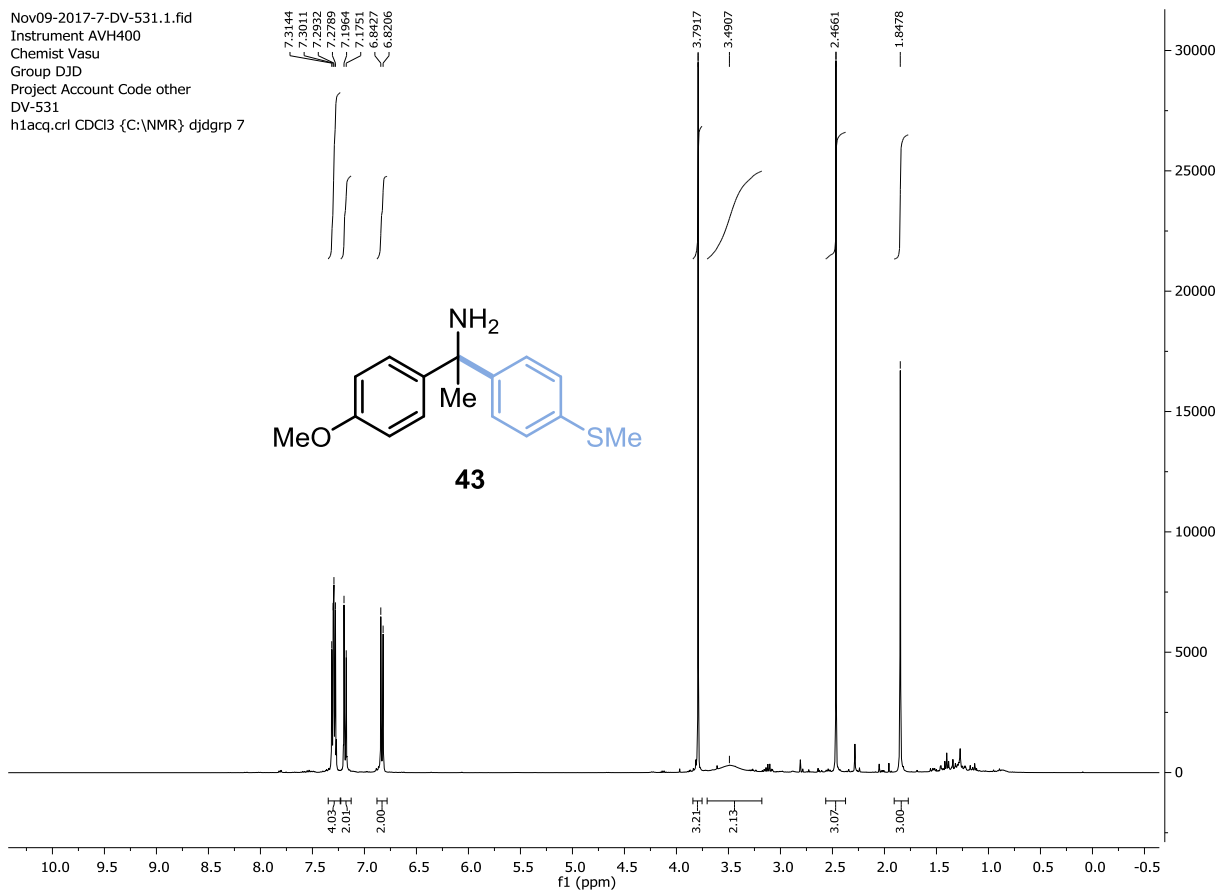

Nov09-2017-7-DV-531.2.fid  
Instrument AVH400  
Chemist Vasu  
Group DJD  
Project Account Code other  
DV-531  
c13acq\_256.crl CDCl3 {C:\NMR} djmgrp 7

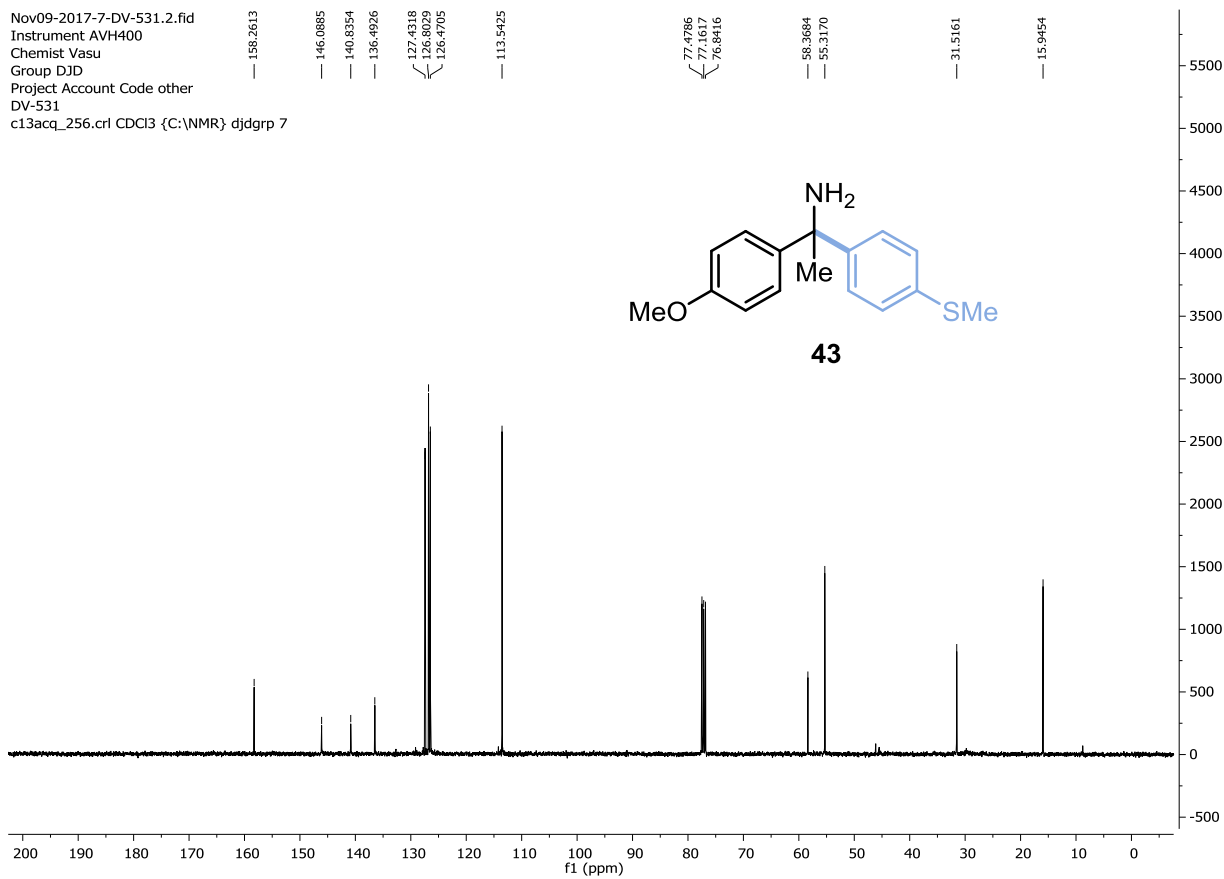

vd01130112.1.fid  
 Instrument AVC500  
 Group DJD  
 Project Account Code DMR00890  
 0113 Vasu Dhananjayan 1/12/17

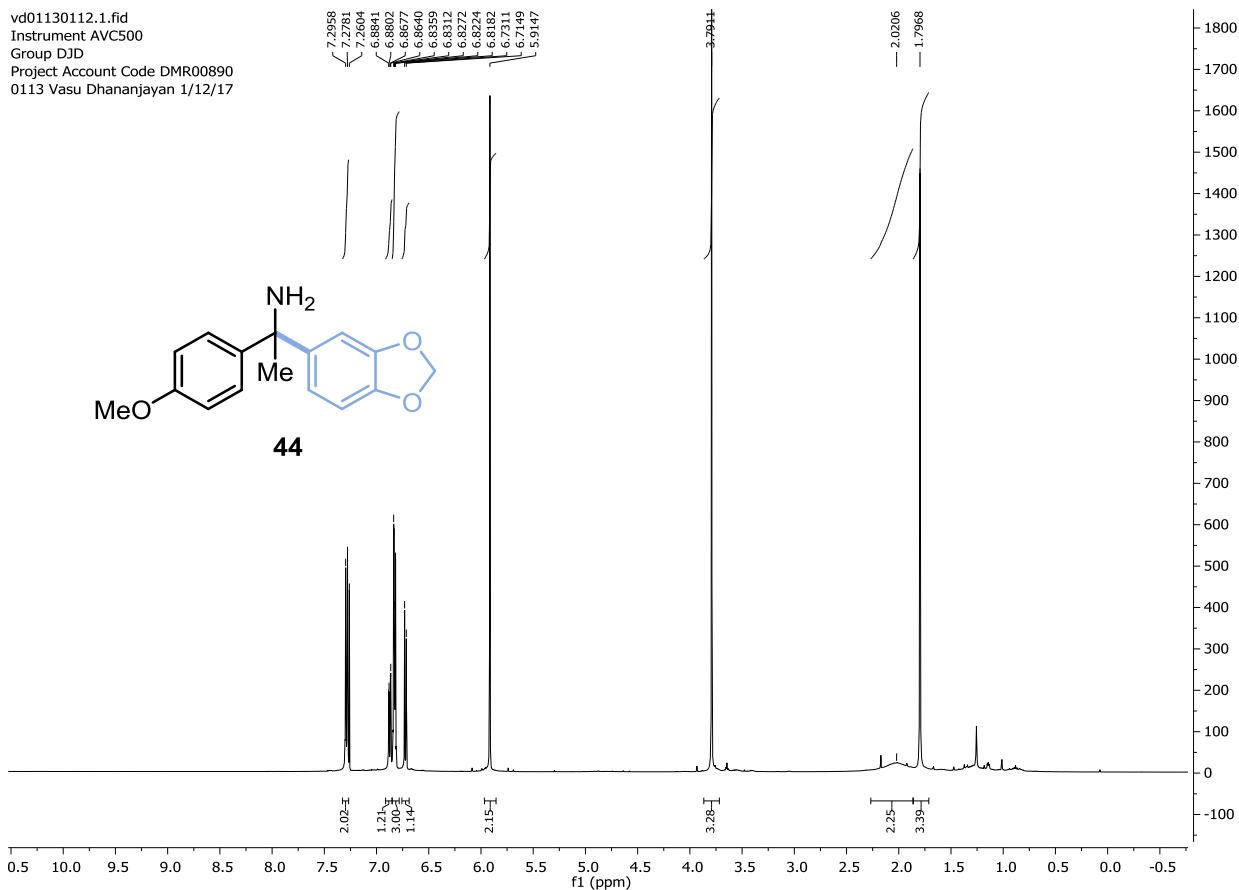

vd01130112.4.fid  
 Instrument AVC500  
 Group DJD  
 Project Account Code DMR00890  
 0113 Vasu Dhananjayan 1/12/17

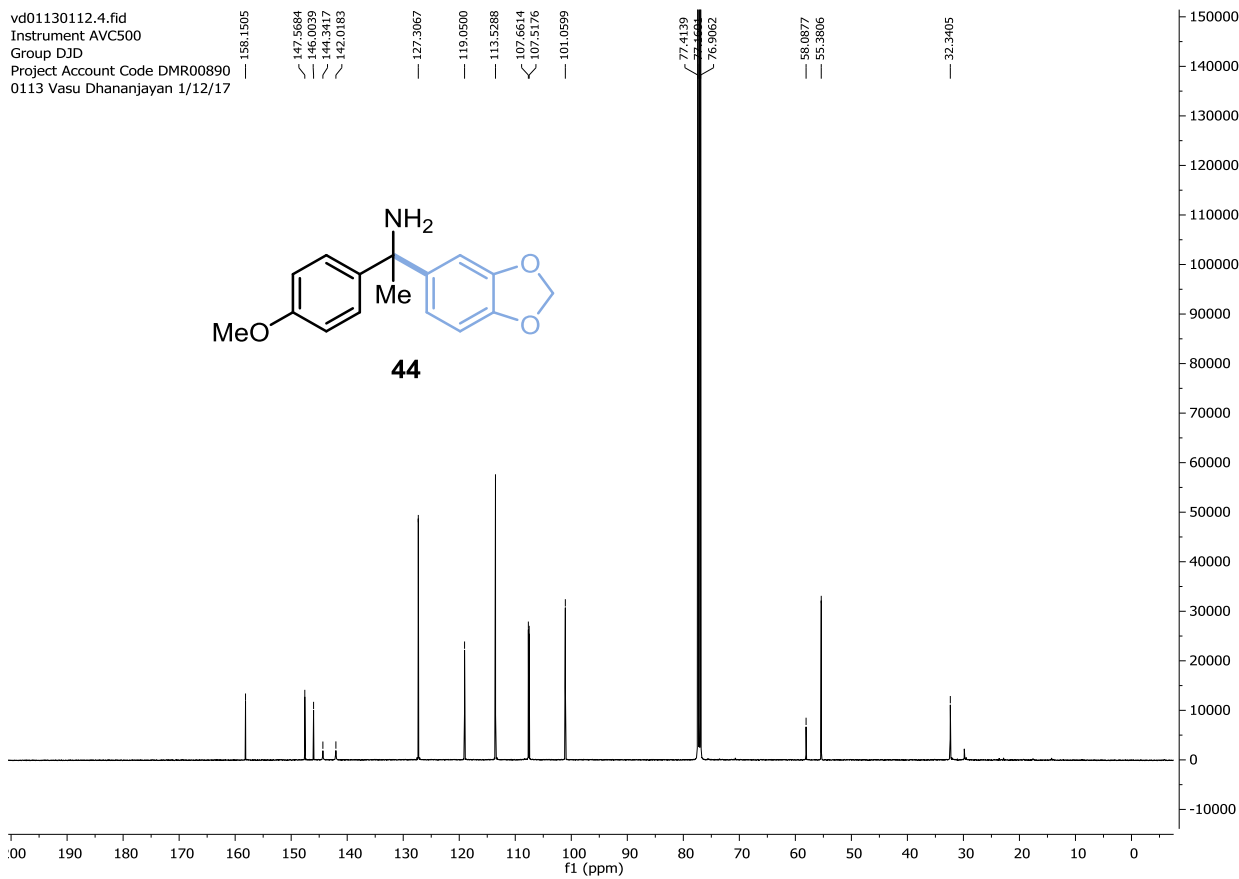

Nov10-2017-53-DV-528-R.1.fid  
Instrument AVH400  
Chemist Vasu  
Group DJD  
Project Account Code other  
DV-528-R  
h1acq.crl CDCl3 {C:\NMR} djgrp 53

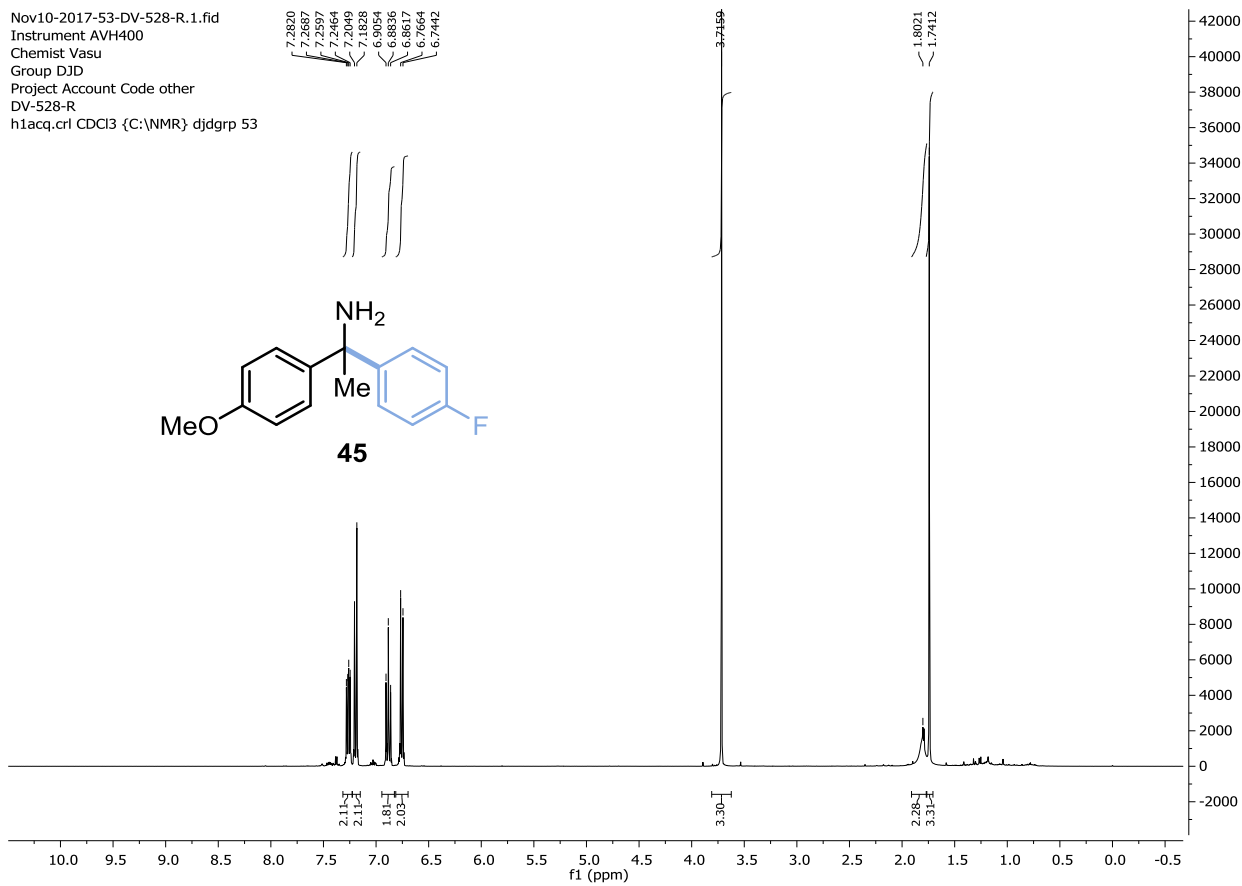

Jun06-2018-1-DV-528-R.2.fid  
Instrument AVF400  
Chemist Vasu  
Group DJD  
Project Account Code other  
DV-528-R  
f19dec.crl CDCl3 {C:\NMR} djgrp 1

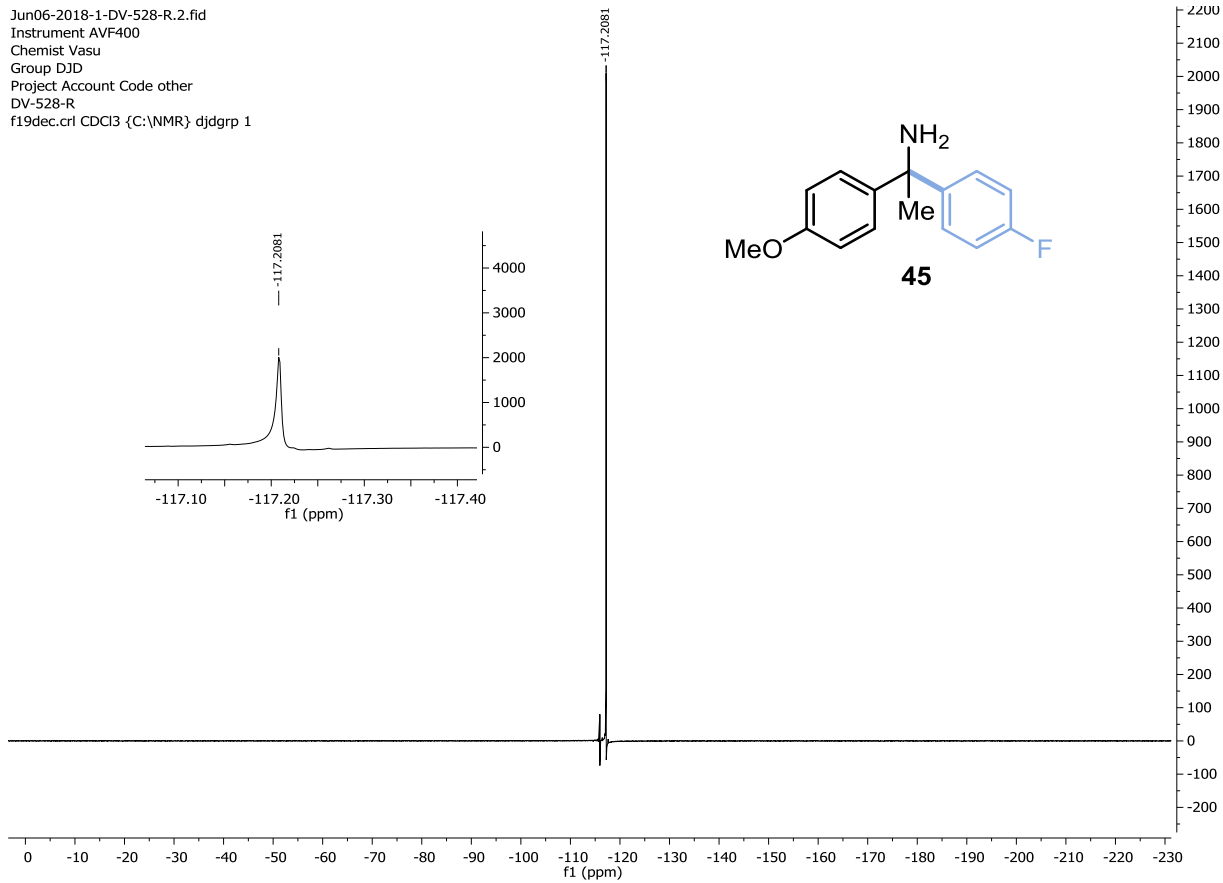

Nov10-2017-53-DV-528-R.3.f1  
Instrument AVH400  
Chemist Vasu  
Group DJD  
Project Account Code other  
DV-528-R  
c13acq\_512.crf CDCl3 {C:\NMR} djgrp 53

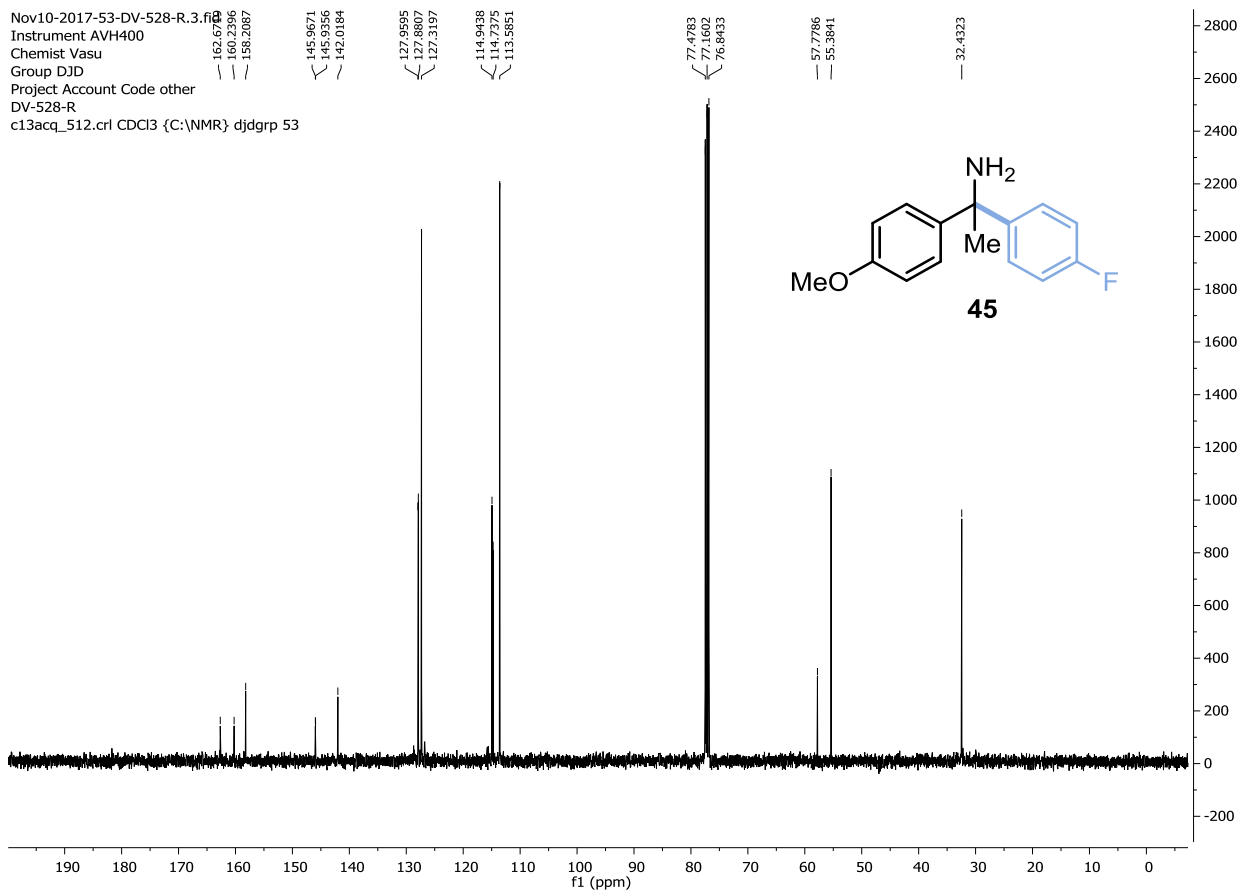

Nov14-2017-20-DV-534.1.fid  
Instrument AVH400  
Chemist Vasu  
Group DJD  
Project Account Code other  
DV-534  
h1acq.crl CDCl3 {C:\NMR} djdgrp 20

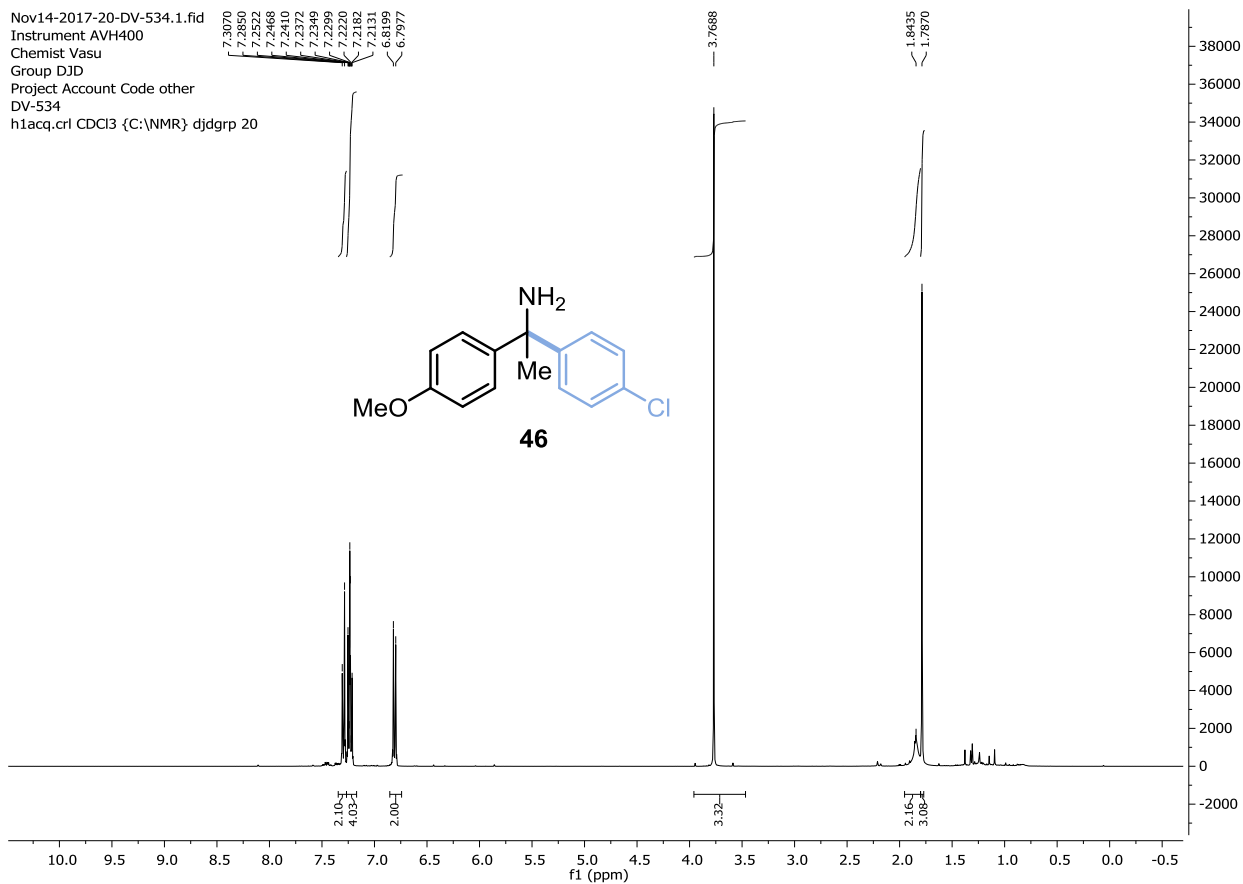

Nov14-2017-20-DV-534.2.fid  
Instrument AVH400  
Chemist Vasu  
Group DJD  
Project Account Code other  
DV-534  
c13acq\_256.crl CDCl3 {C:\NMR} djdgrp 20

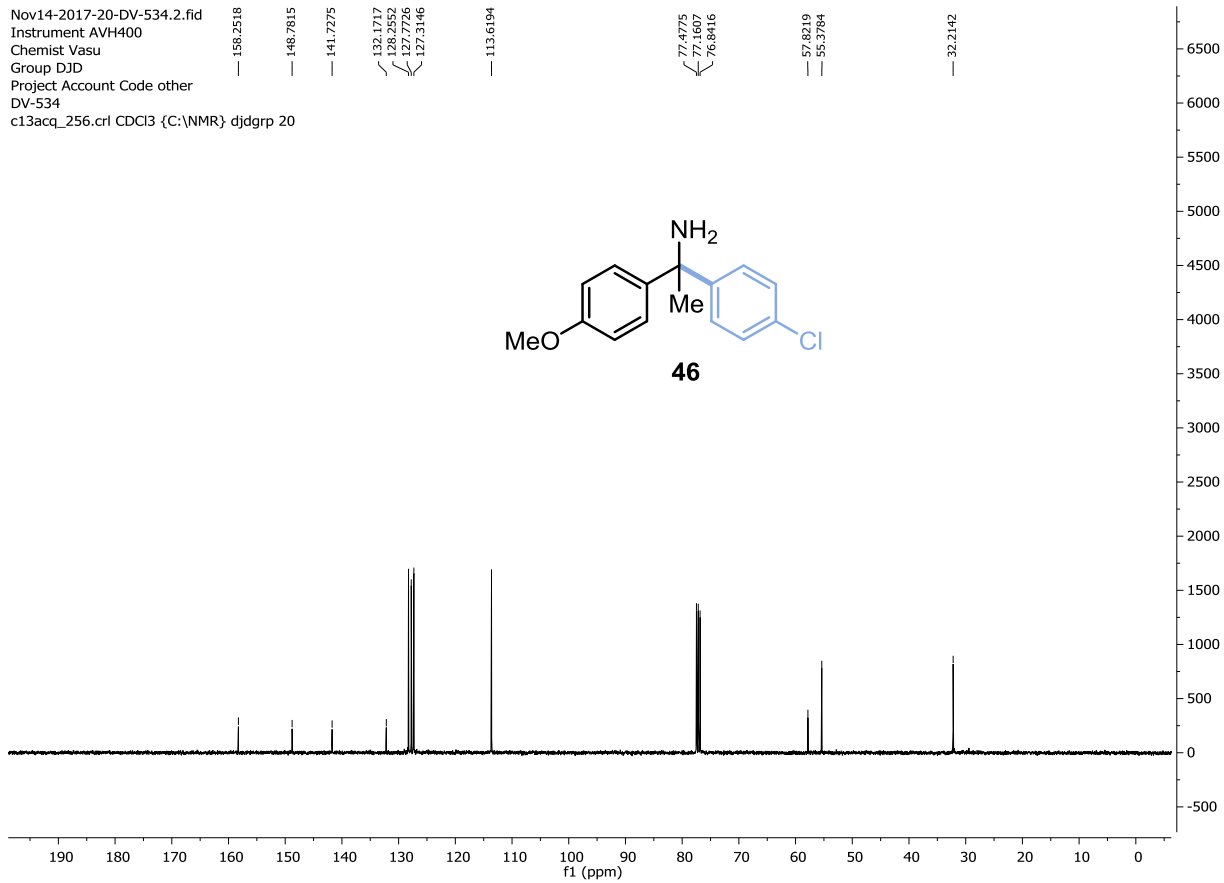

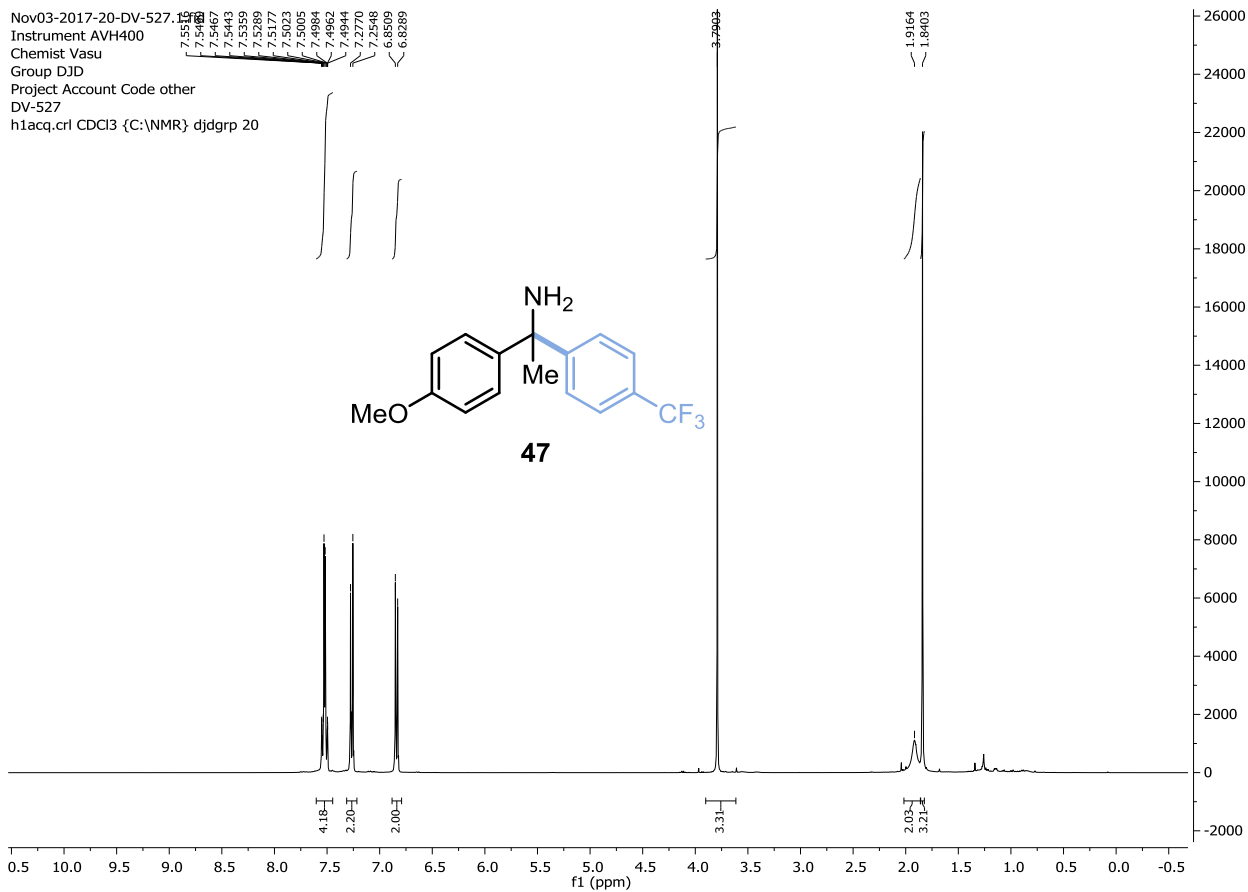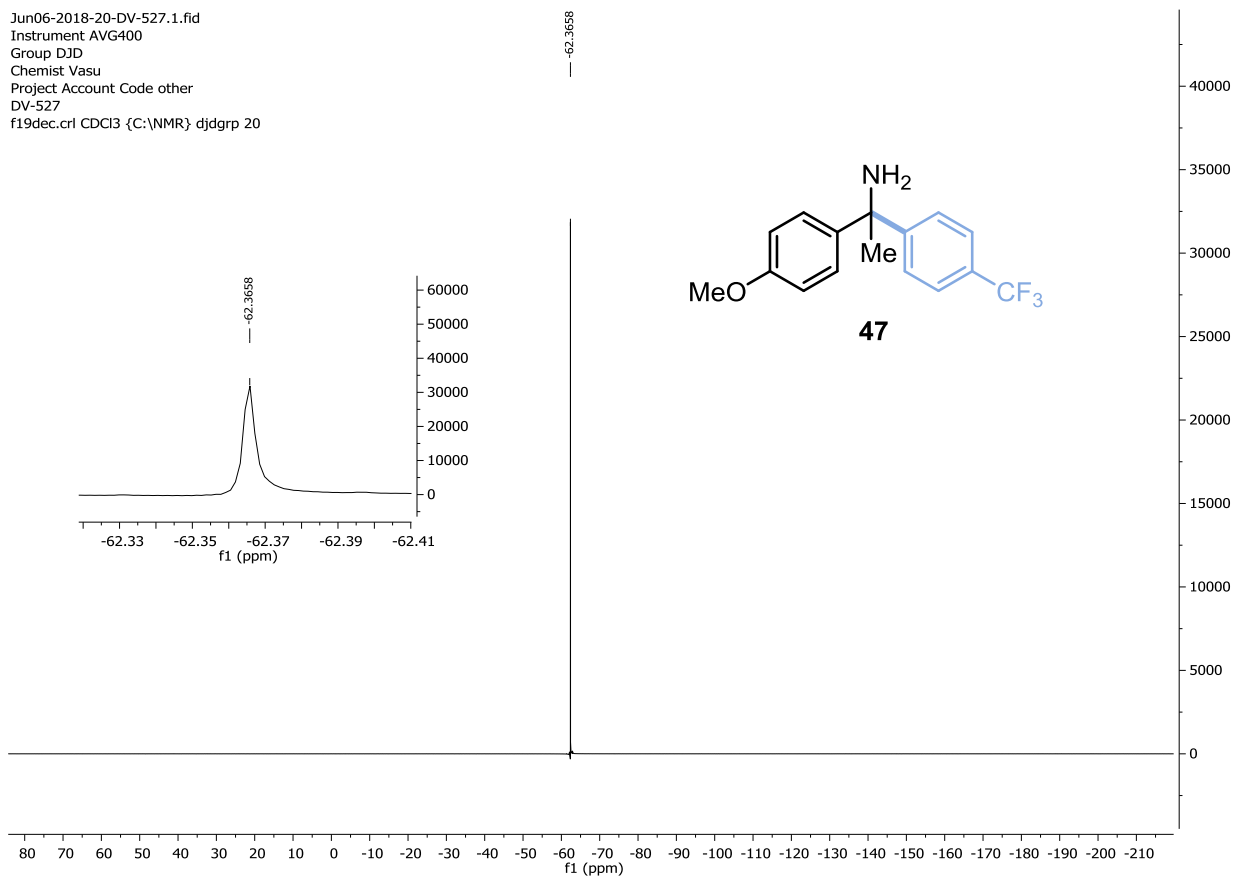

Nov03-2017-20-DV-527.2.fid  
Instrument AVH400  
Chemist Vasu  
Group DJD  
Project Account Code other  
DV-527

c13acq\_512.crl CDCl3 {C:\NMR} djgrp 20

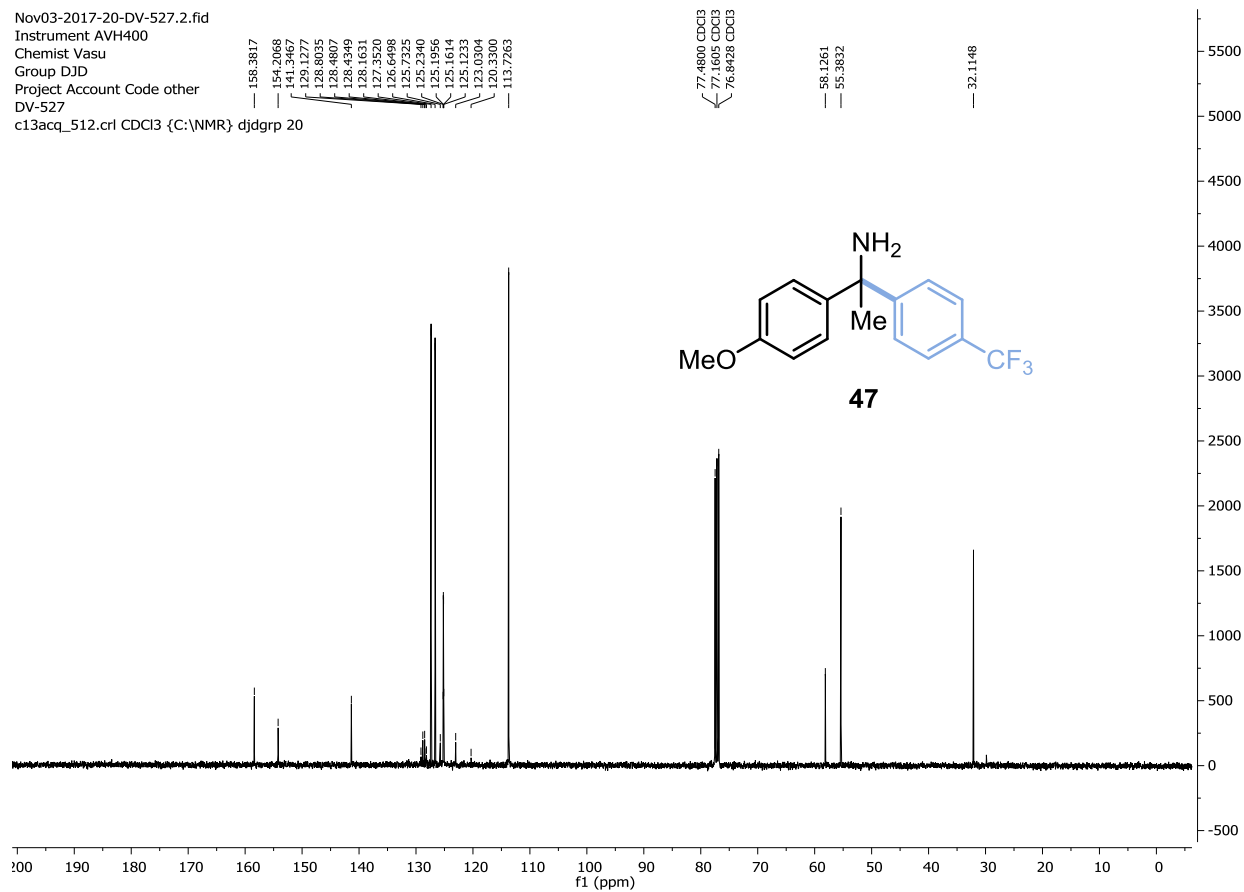

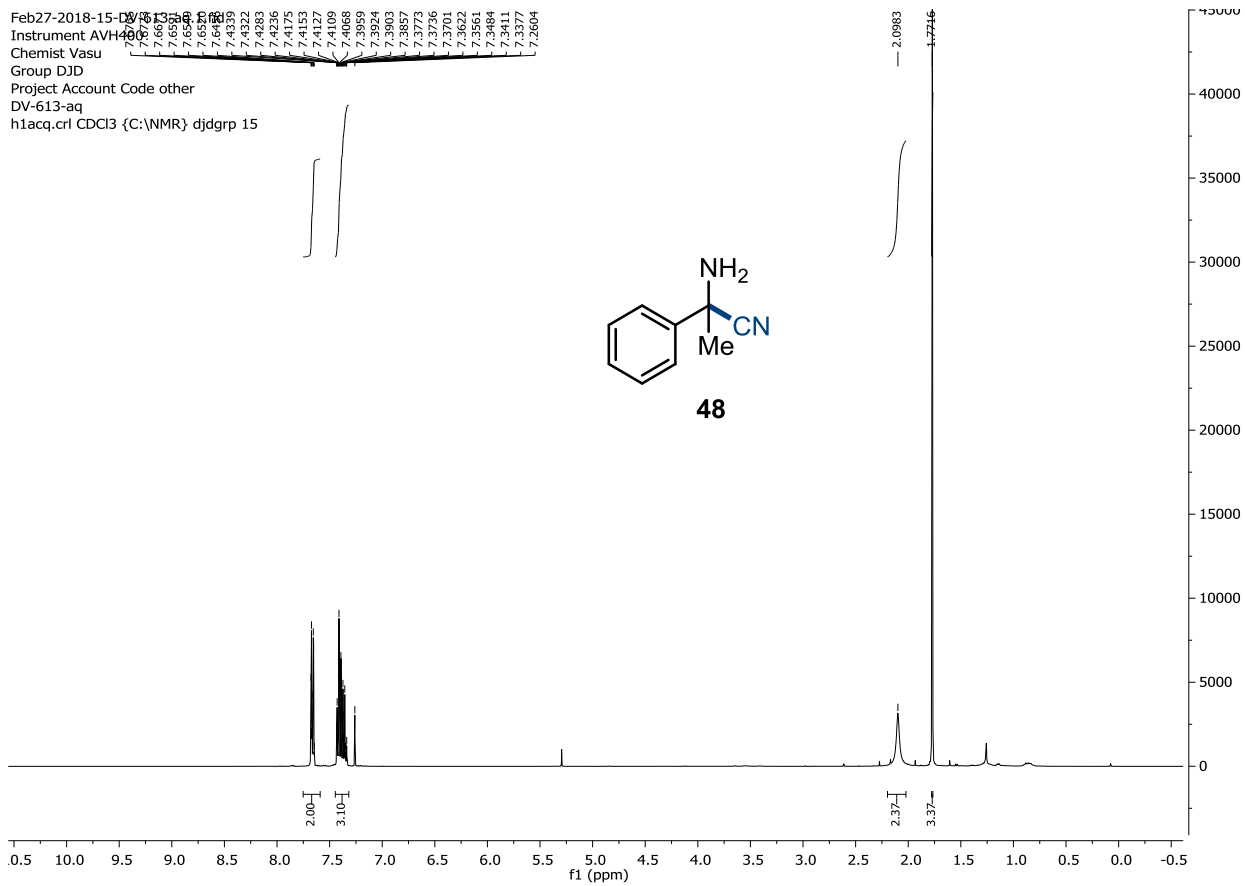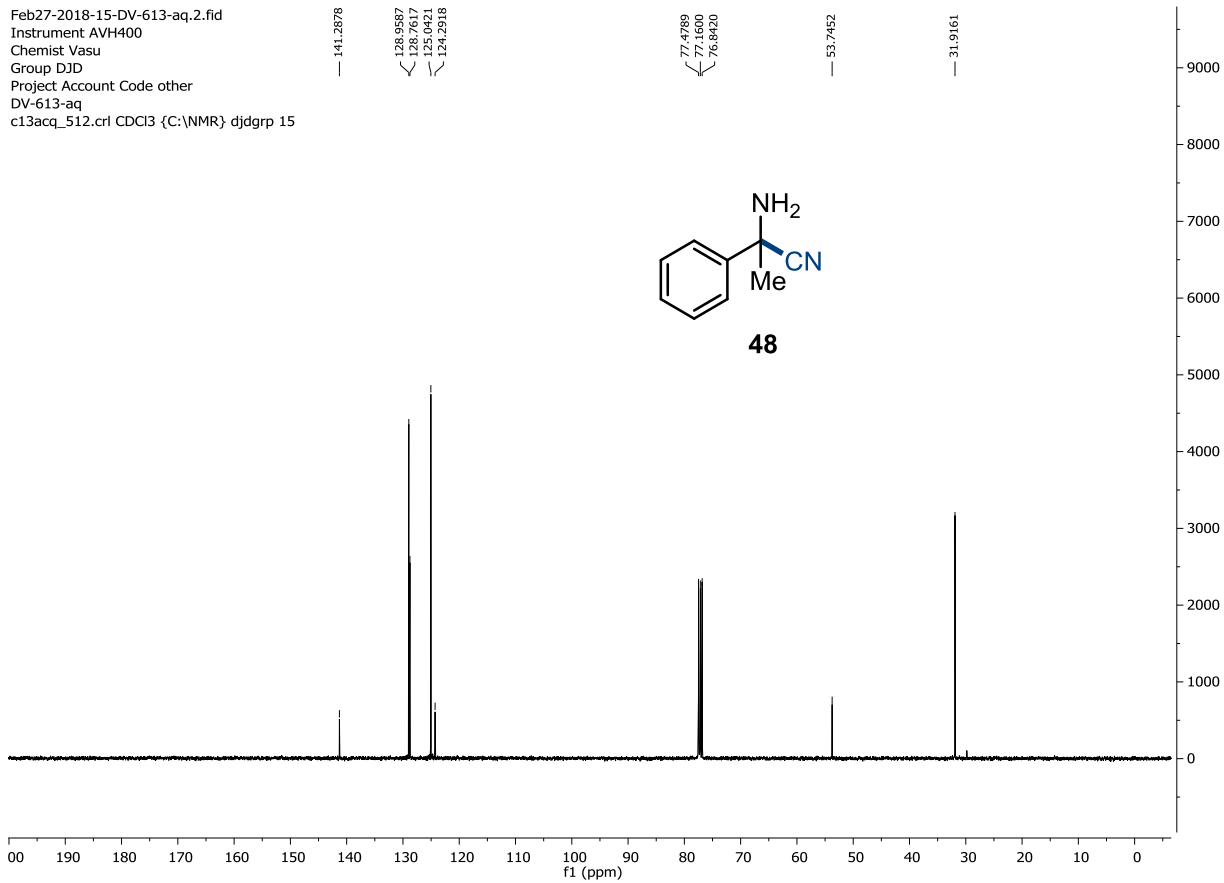



Apr04-2018-49-DV-600-R.1.fid  
Instrument AVH400  
Chemist Vasu  
Group DJD  
Project Account Code other  
DV-600-R  
h1acq.crl CD3CN {C:\NMR} djdgrp 49

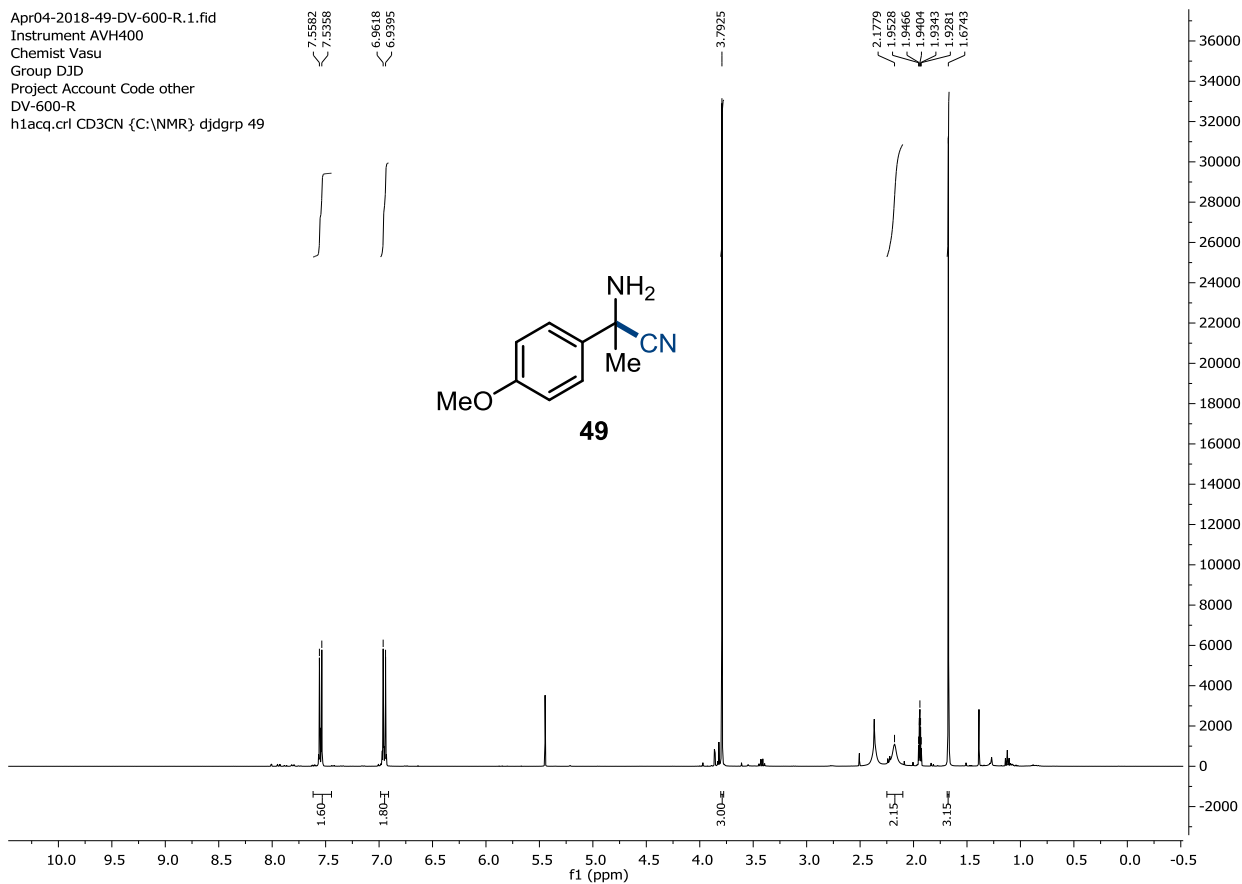

Feb23-2018-17-DV-600-1.2.fid  
Instrument AVH400  
Chemist Vasu  
Group DJD  
Project Account Code other  
DV-600-1  
c13acq\_512.crl CDCl3 {C:\NMR} djdgrp 17

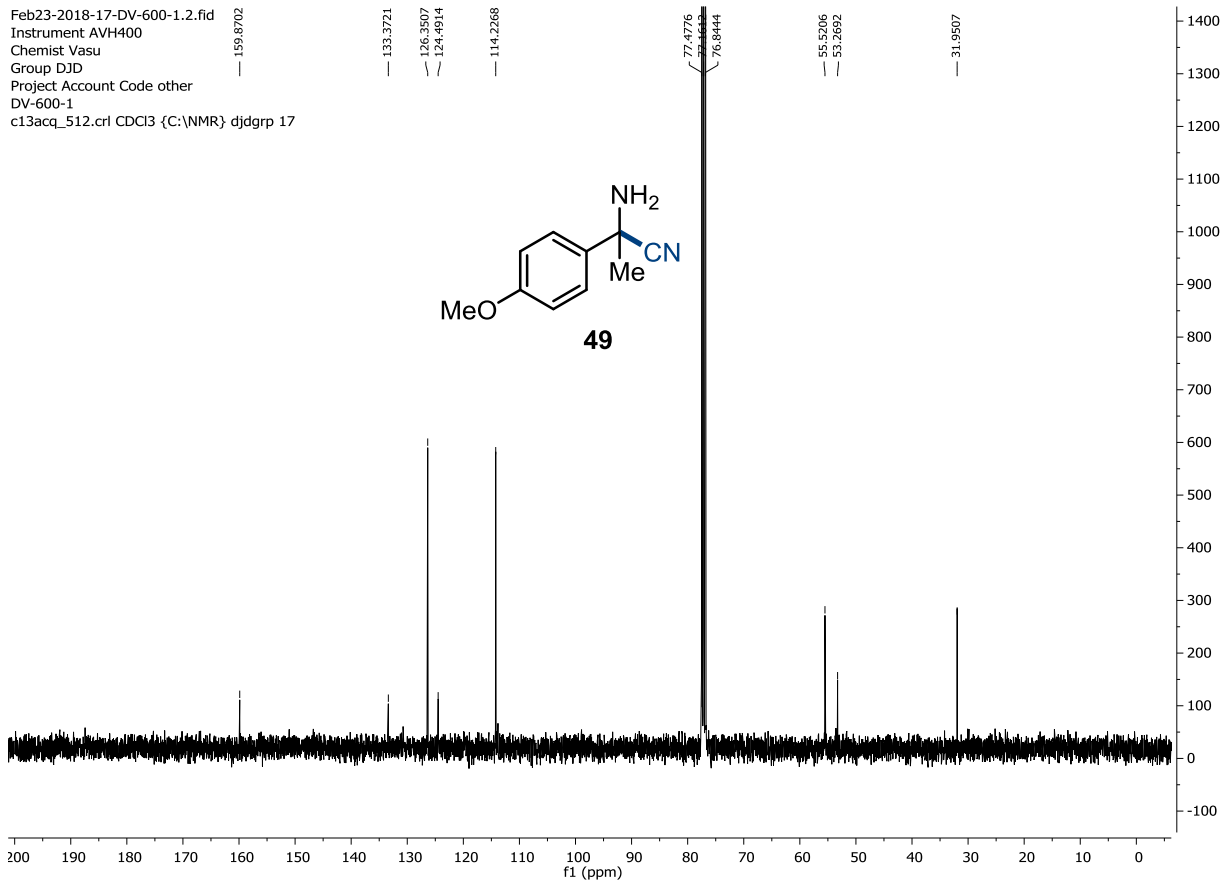

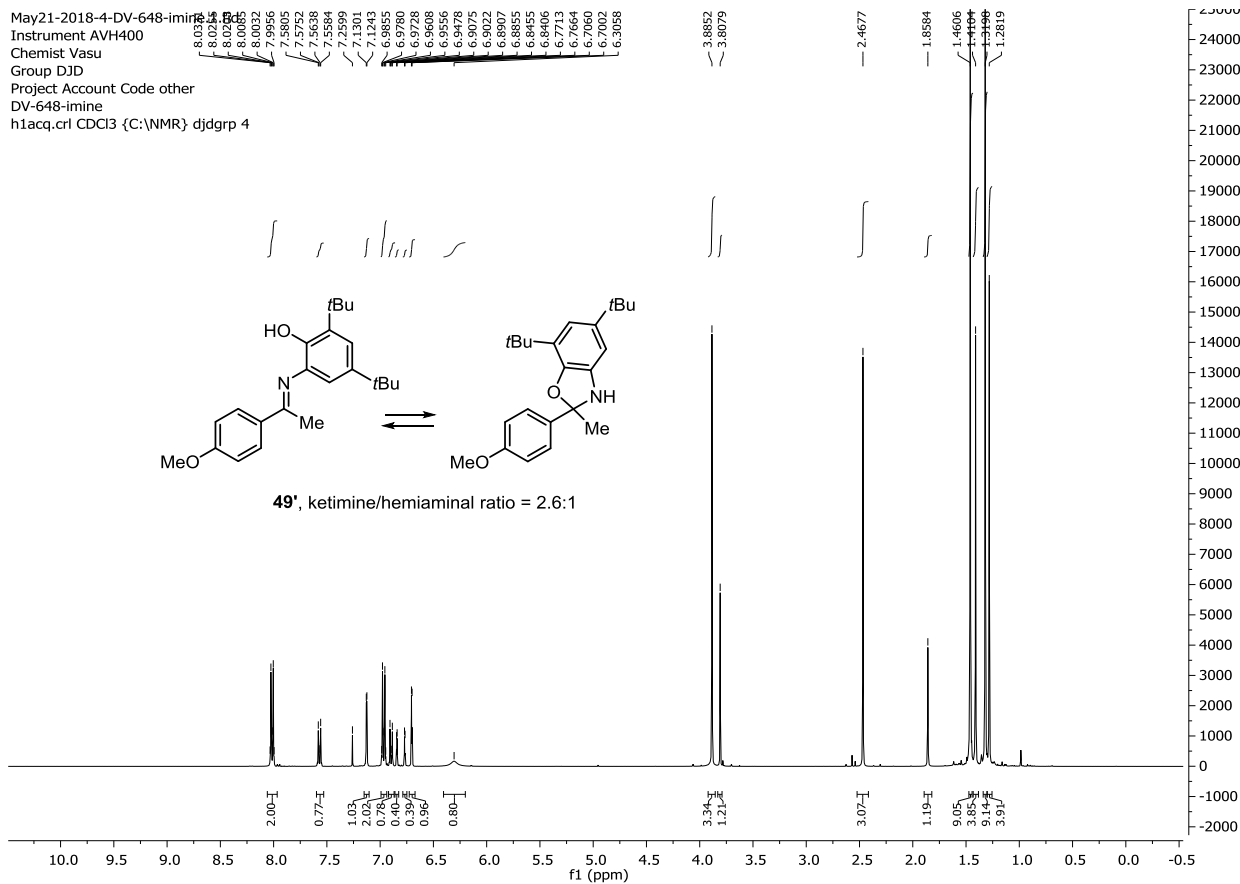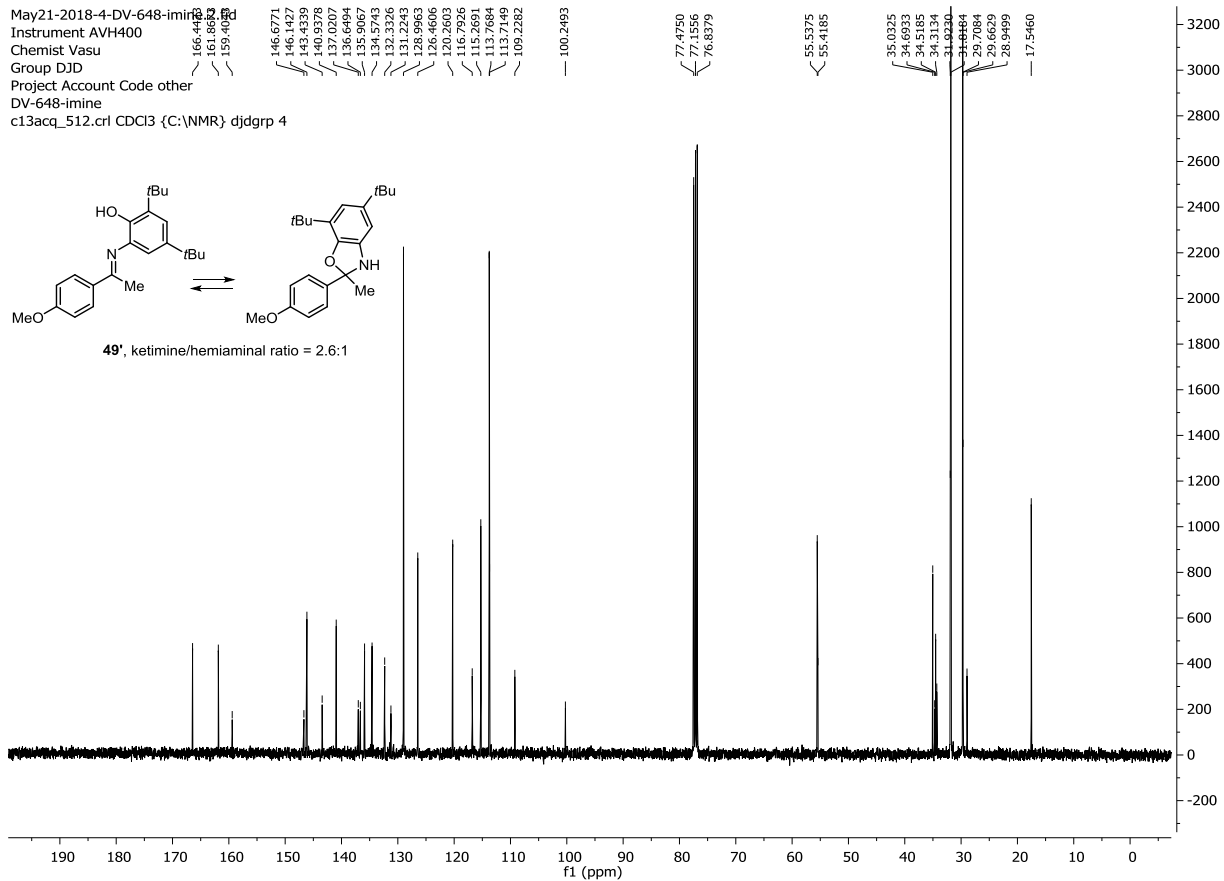

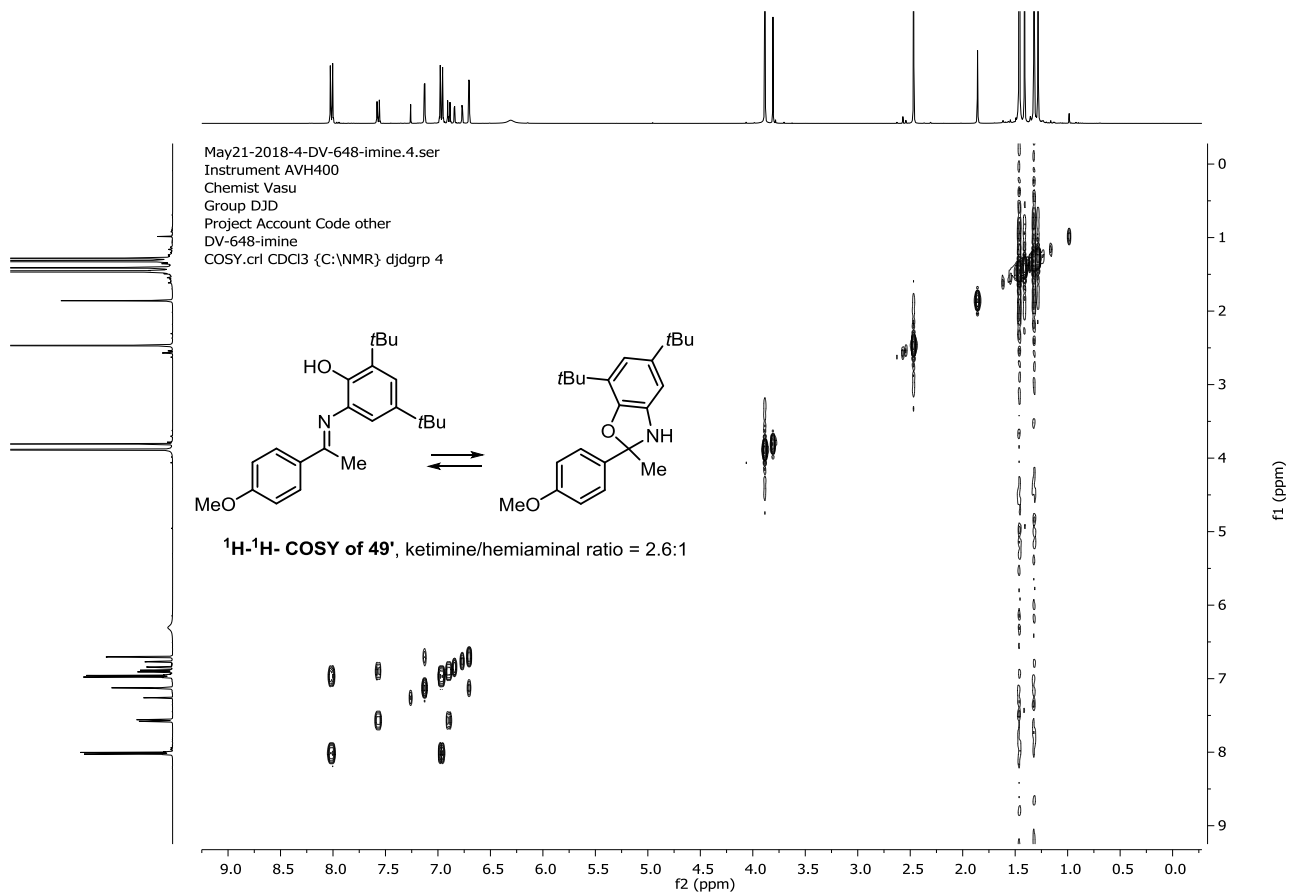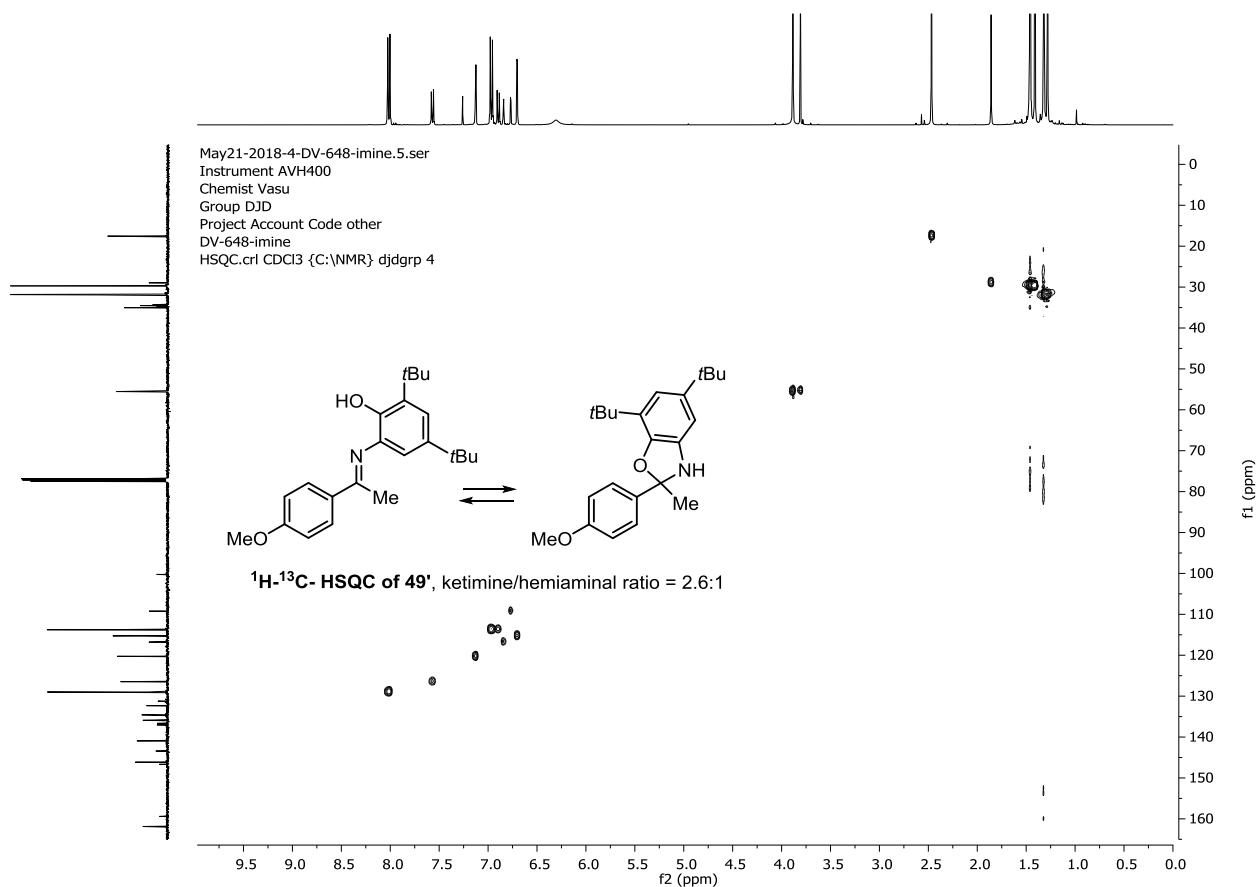

Dec06-2017-19-DV-560-0.6.fid  
 Instrument AVH400  
 Chemist Vasu  
 Group DJD  
 Project Account Code other  
 DV-560-0  
 h1acq.crl CDCl3 {C:\NMR} djgrp 19

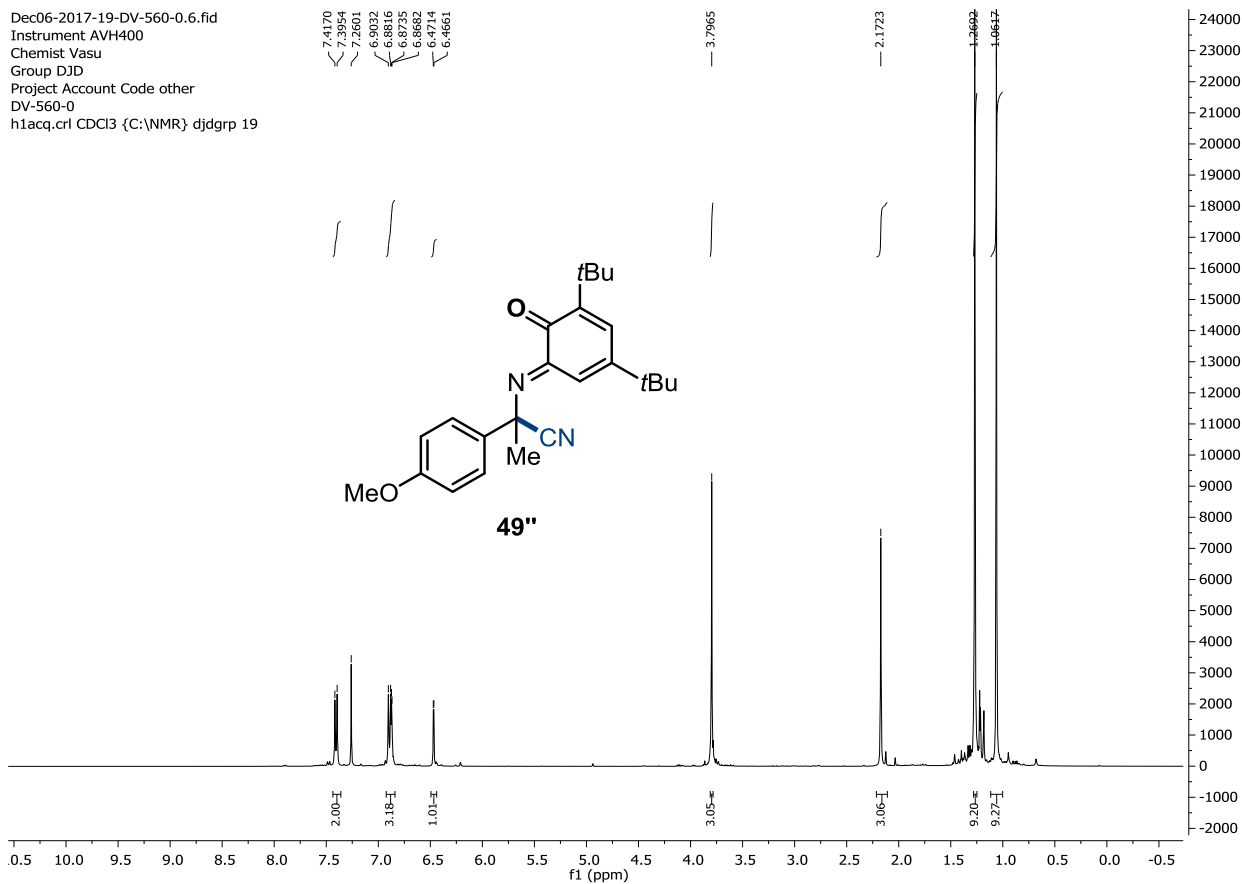

Dec06-2017-19-DV-560-0.2.fid  
 Instrument AVH400  
 Chemist Vasu  
 Group DJD  
 Project Account Code other  
 DV-560-0  
 c13acq\_512.crl CDCl3 {C:\NMR} djgrp 19

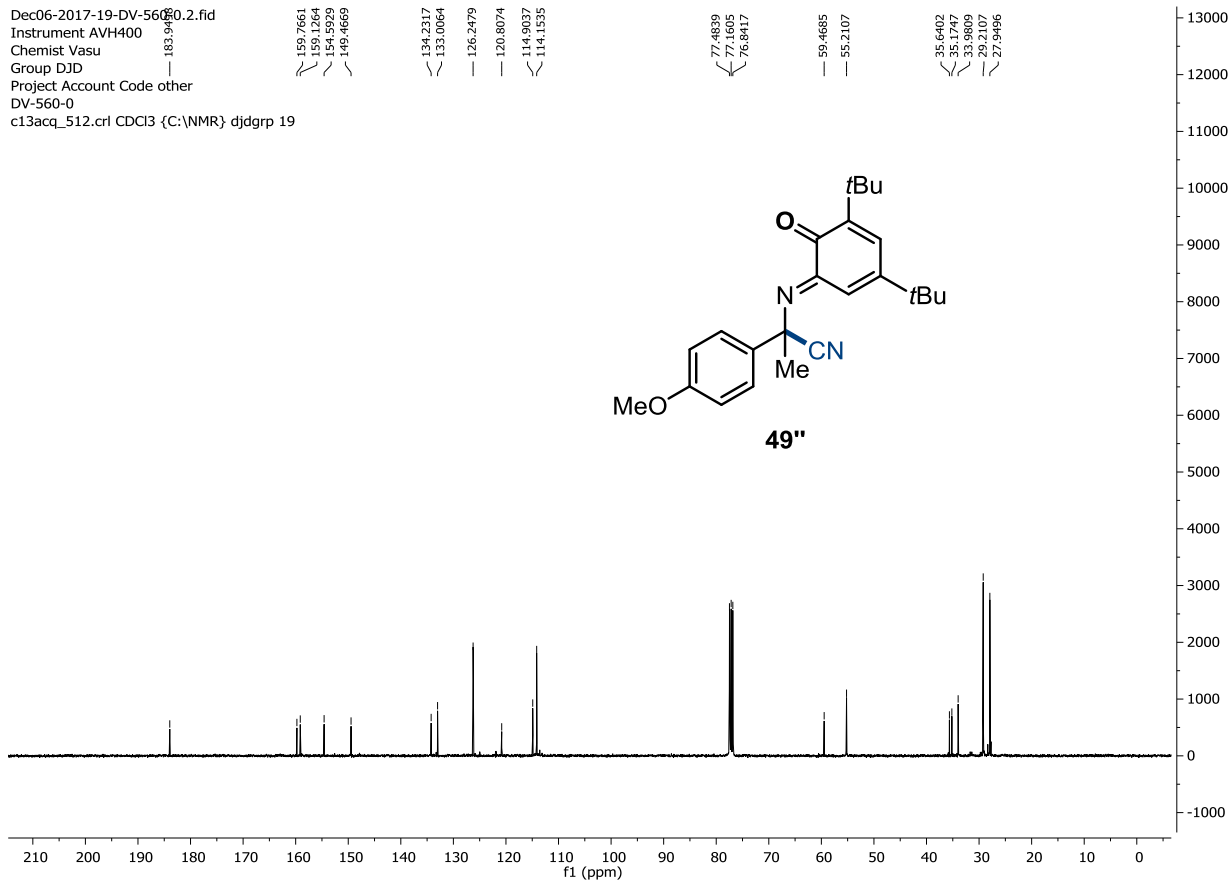

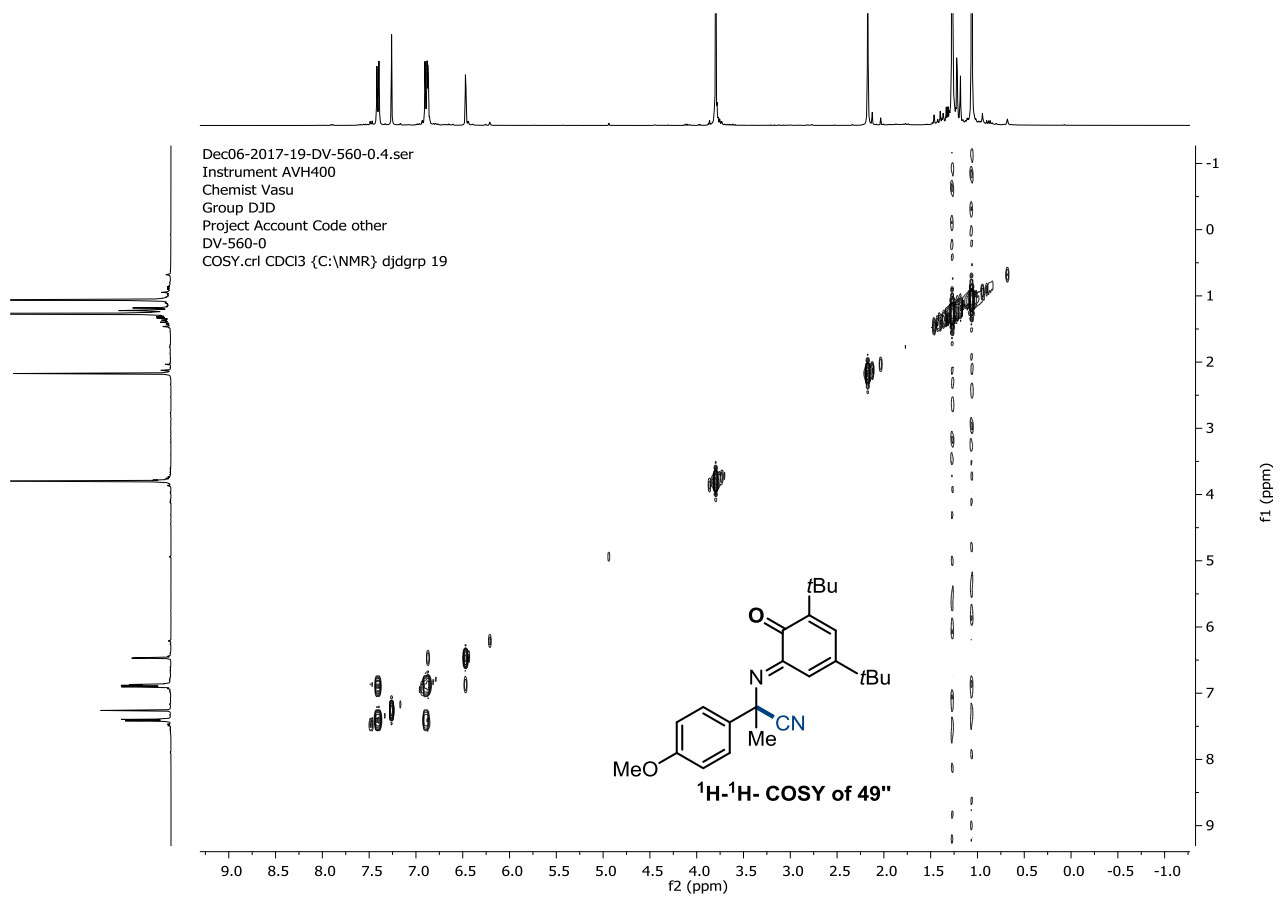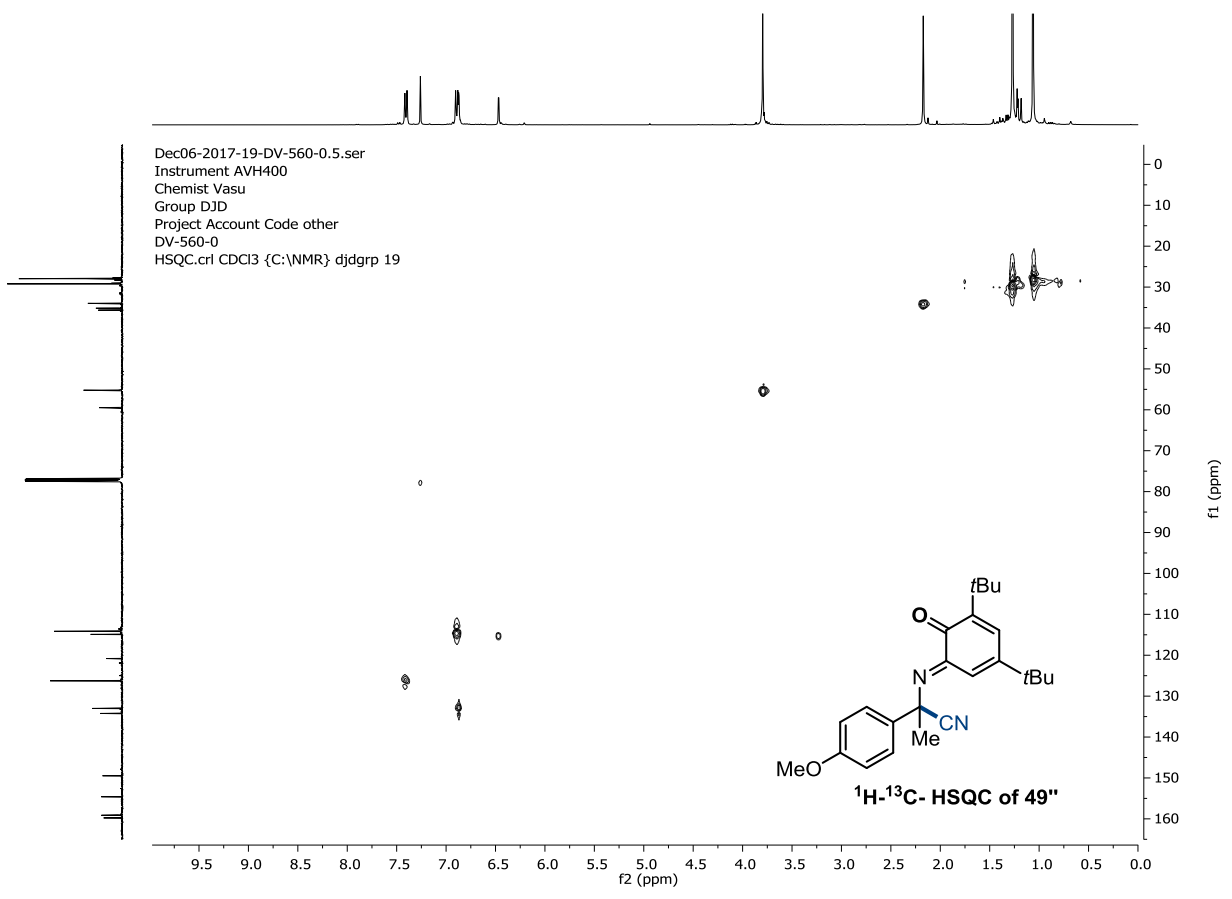

Mar12-2018-38-DV-616.6.fid  
Instrument AVH400  
Chemist Vasu  
Group DJD  
Project Account Code other  
DV-616  
h1acq.crl CDCl3 {C:\NMR} djdgrp 38

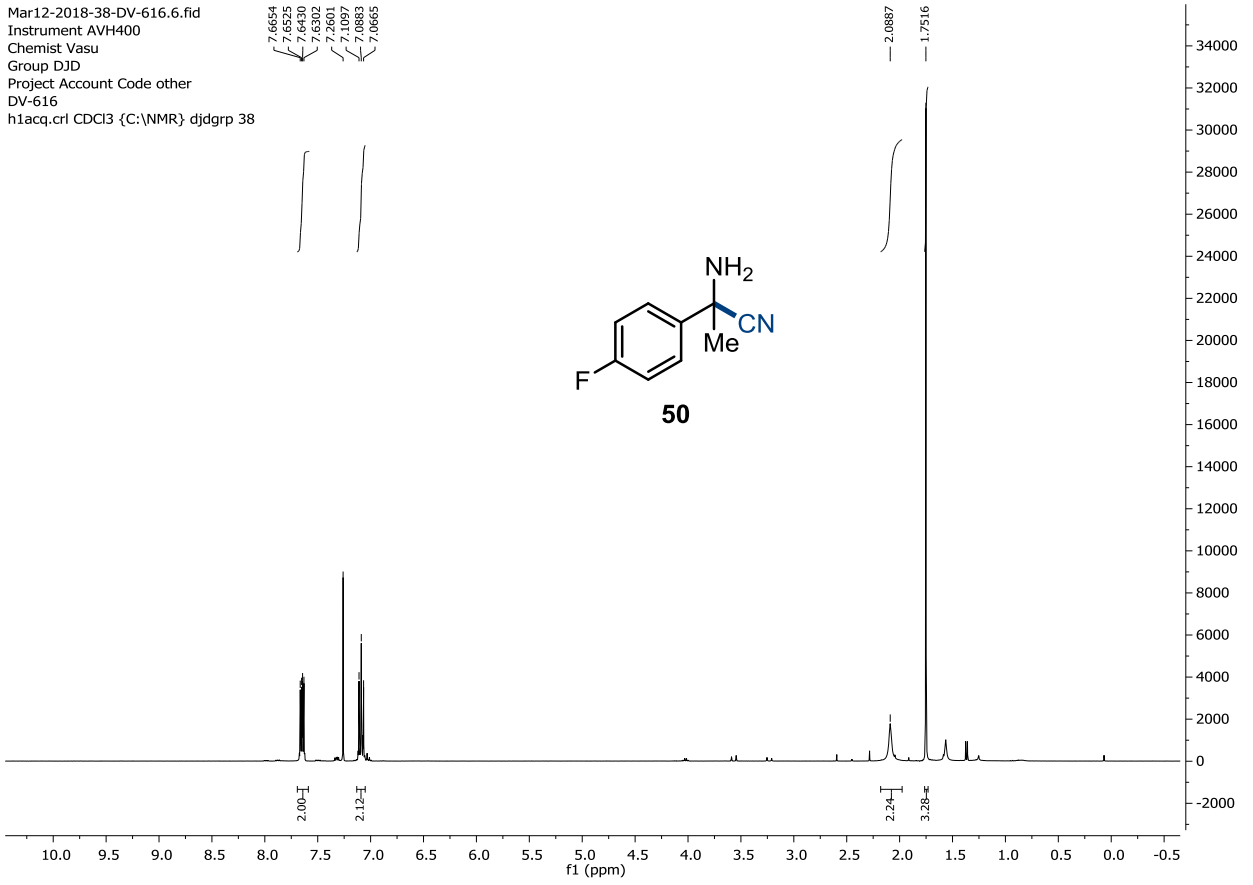

Jun06-2018-1-DV-616.2.fid  
Instrument AVF400  
Chemist Vasu  
Group DJD  
Project Account Code other  
DV-616  
f19dec.crl CD3CN {C:\NMR} djdgrp 1

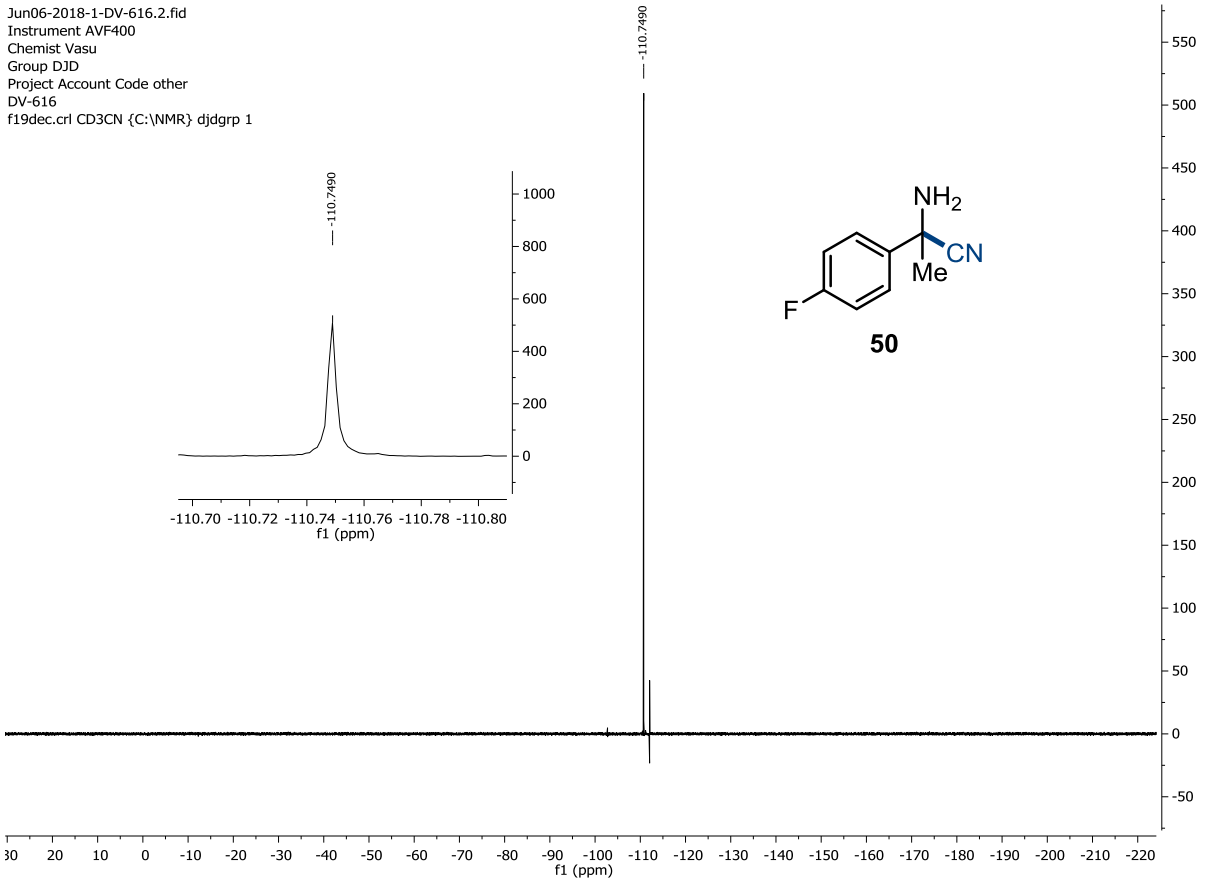

vd11881403.1.fid  
Instrument AVC500  
Group DJD  
Project Account Code DMR00890  
1188 Vasu Dhananjayan 14/3/18

63.82249  
161.8555

137.1554  
127.0458  
126.9795  
124.1247  
115.9380  
115.7661

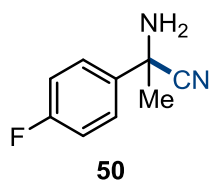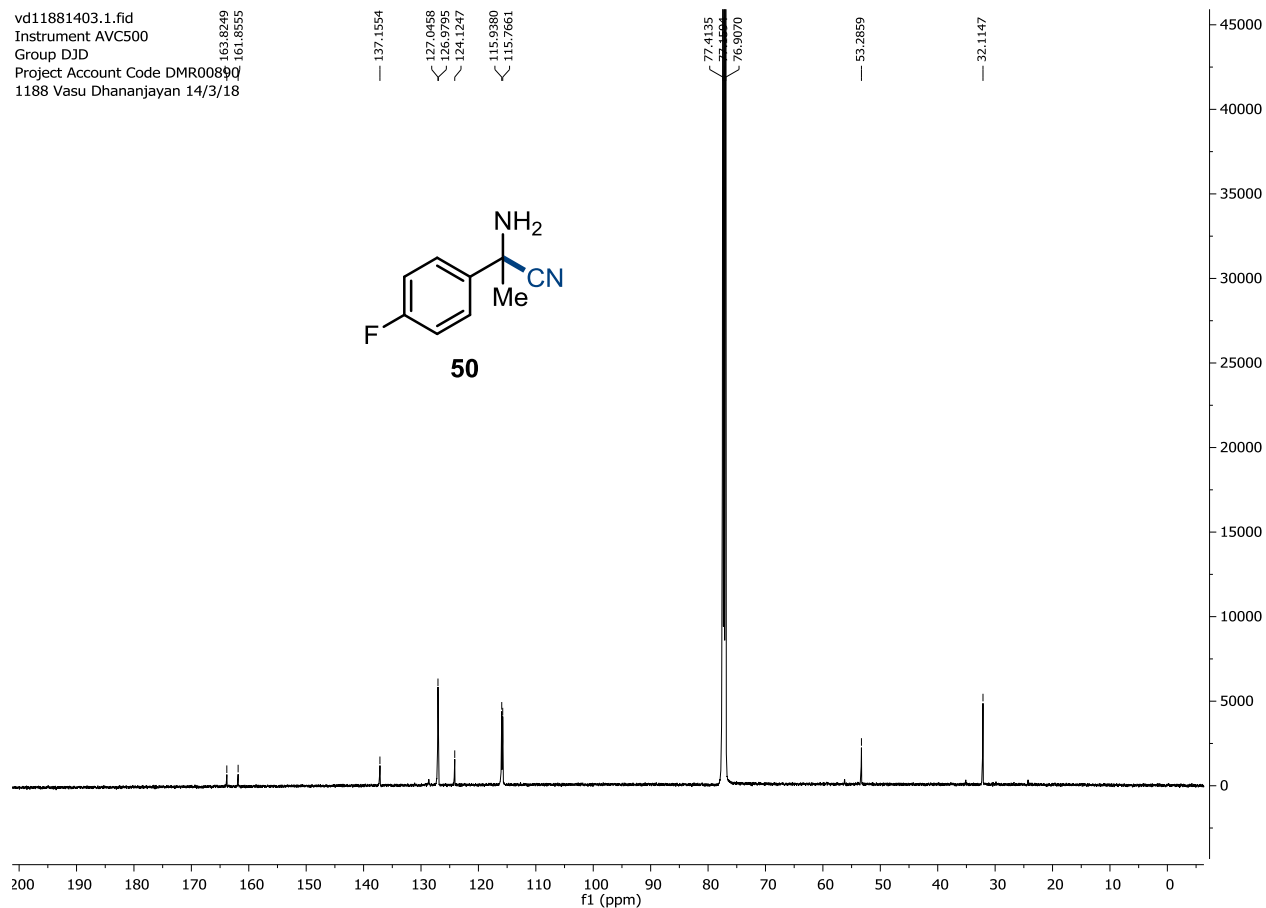

Mar23-2018-48-DV-623-R.6.fid  
Instrument AVH400  
Chemist Vasu  
Group DJD  
Project Account Code other  
DV-623-R  
h1acq.crl CDCl3 {C:\NMR} djgrp 48

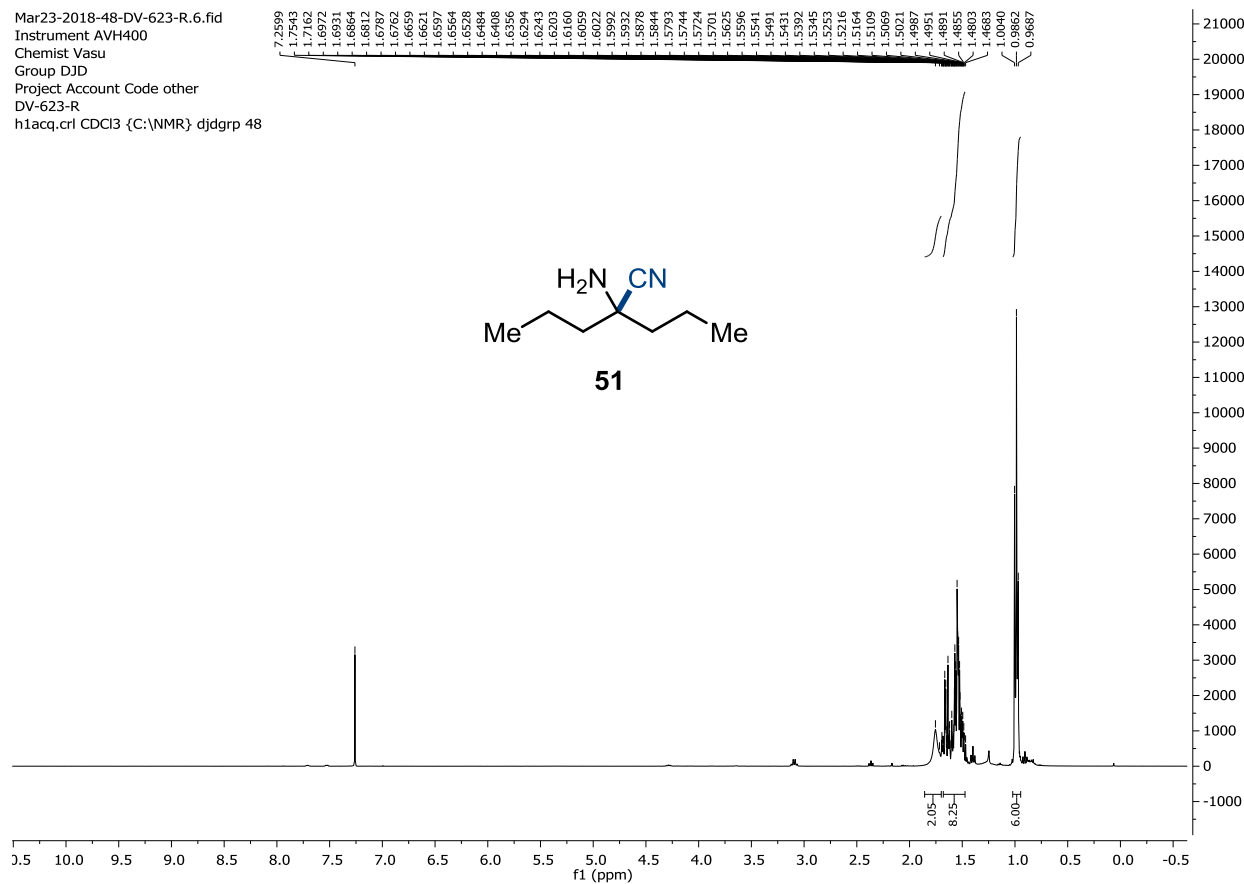

Mar23-2018-48-DV-623-R.2.fid  
Instrument AVH400  
Chemist Vasu  
Group DJD  
Project Account Code other  
DV-623-R  
c13acq\_512.crl CDCl3 {C:\NMR} djgrp 48

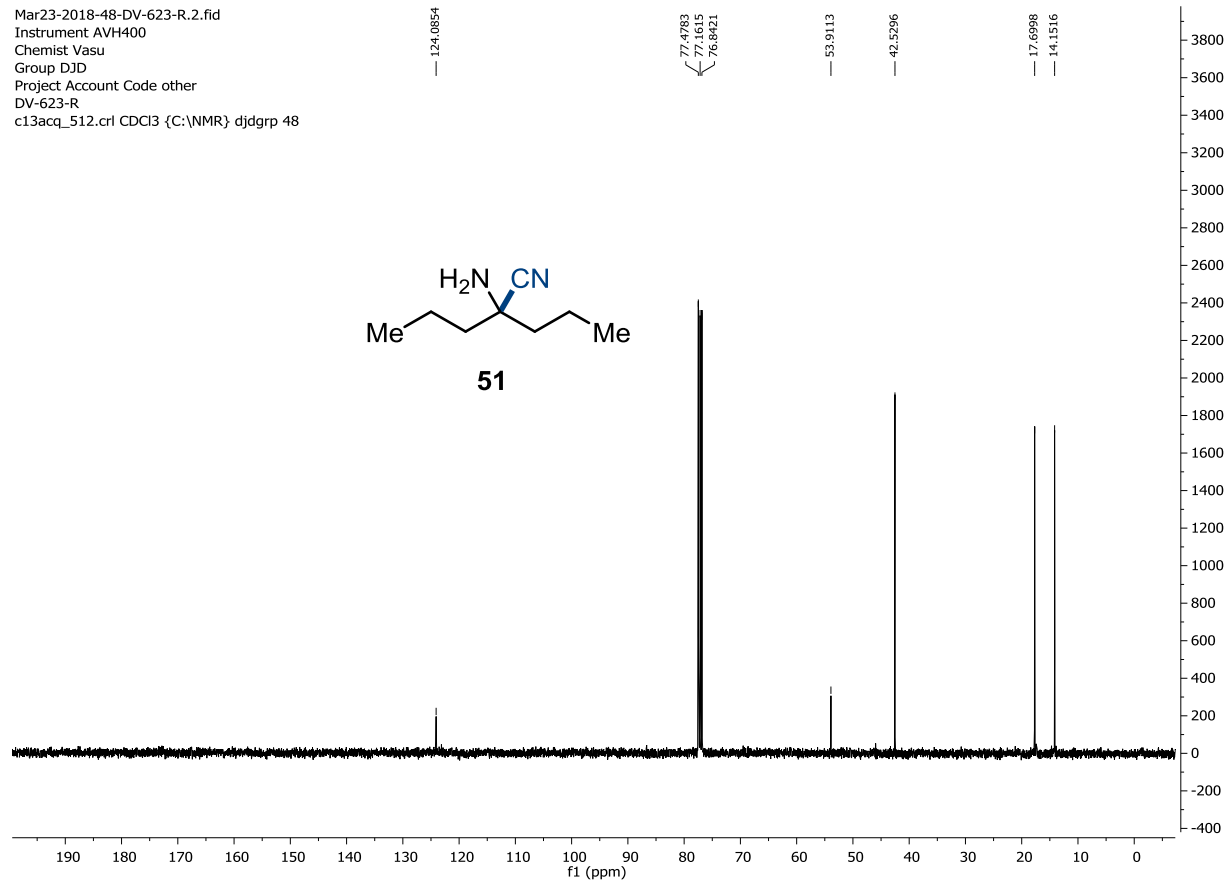



Mar09-2018-37-DV-618-crude.1.fid  
Instrument AVG400  
Group DJD  
Chemist Vasu  
Project Account Code other  
DV-618-crude  
h1acq.crl CDCl3 {C:\NMR} djgrp 37

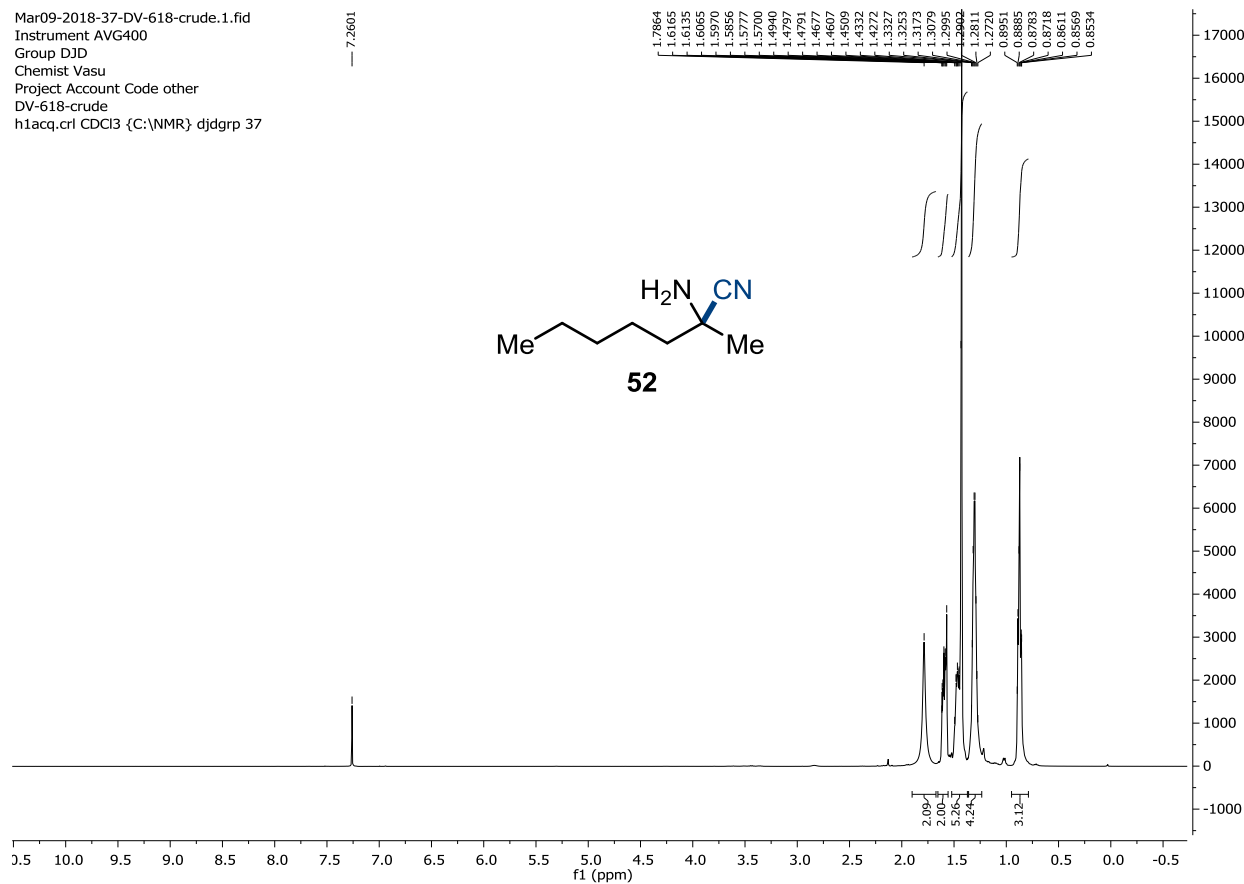

Mar09-2018-37-DV-618-crude.3.fid  
Instrument AVG400  
Group DJD  
Chemist Vasu  
Project Account Code other  
DV-618-crude  
c13acq\_512.crl CDCl3 {C:\NMR} djgrp 37

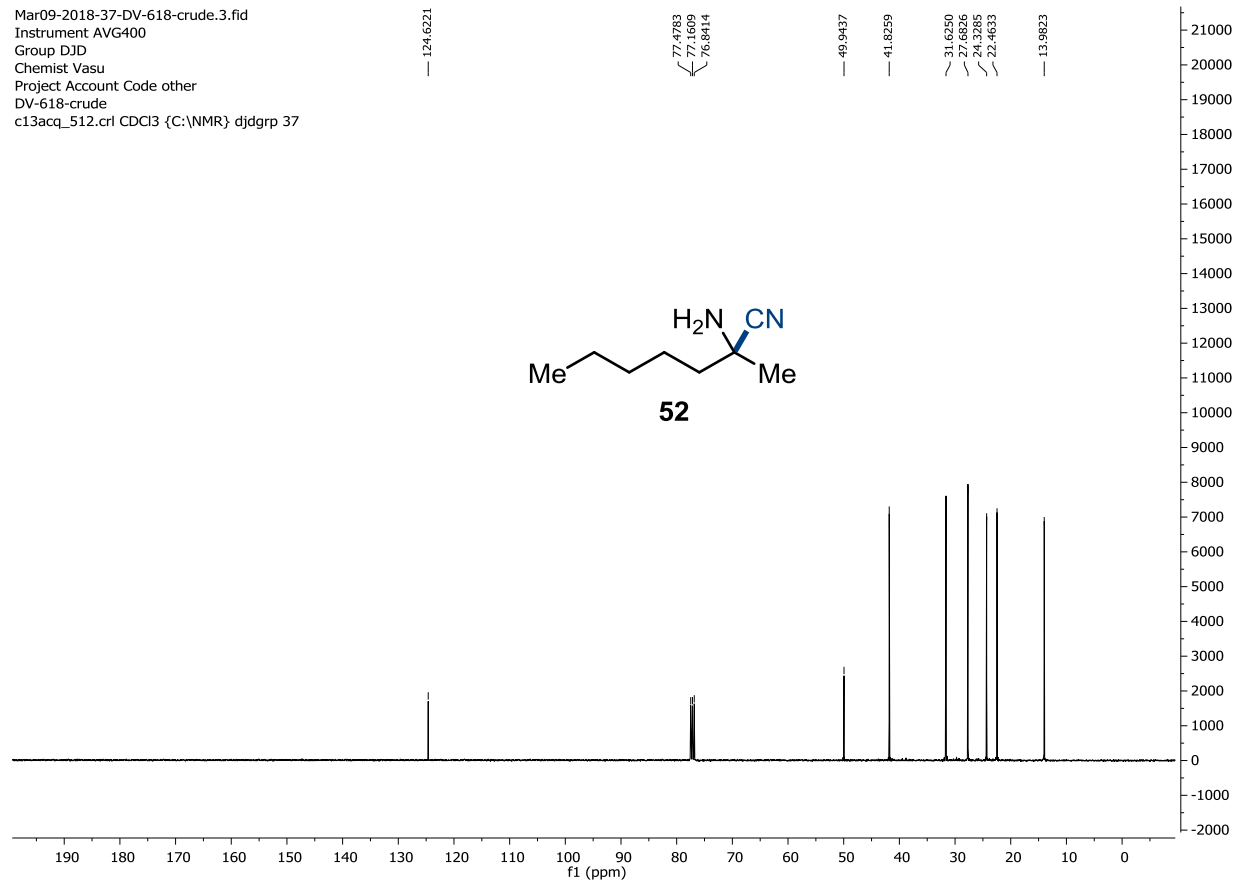

Mar26-2018-58-DV-626-crude.1.fid  
 Instrument AVH400  
 Chemist Vasu  
 Group DJD  
 Project Account Code other  
 DV-626-crude  
 h1acq.crl CD3CN {C:\NMR} djdgrp 58

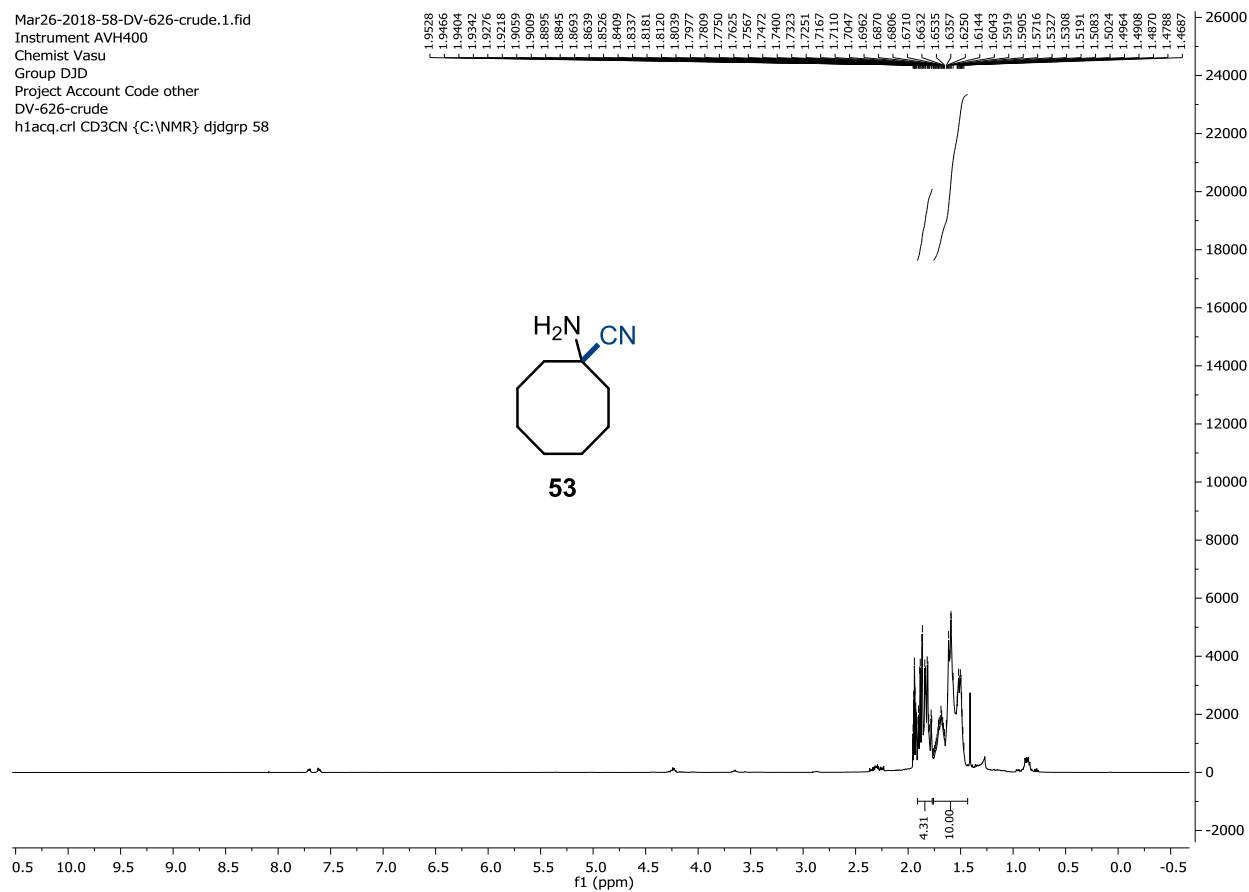

Mar26-2018-58-DV-626-crude.3.fid  
 Instrument AVH400  
 Chemist Vasu  
 Group DJD  
 Project Account Code other  
 DV-626-crude  
 c13acq\_512.crl CD3CN {C:\NMR} djdgrp 58

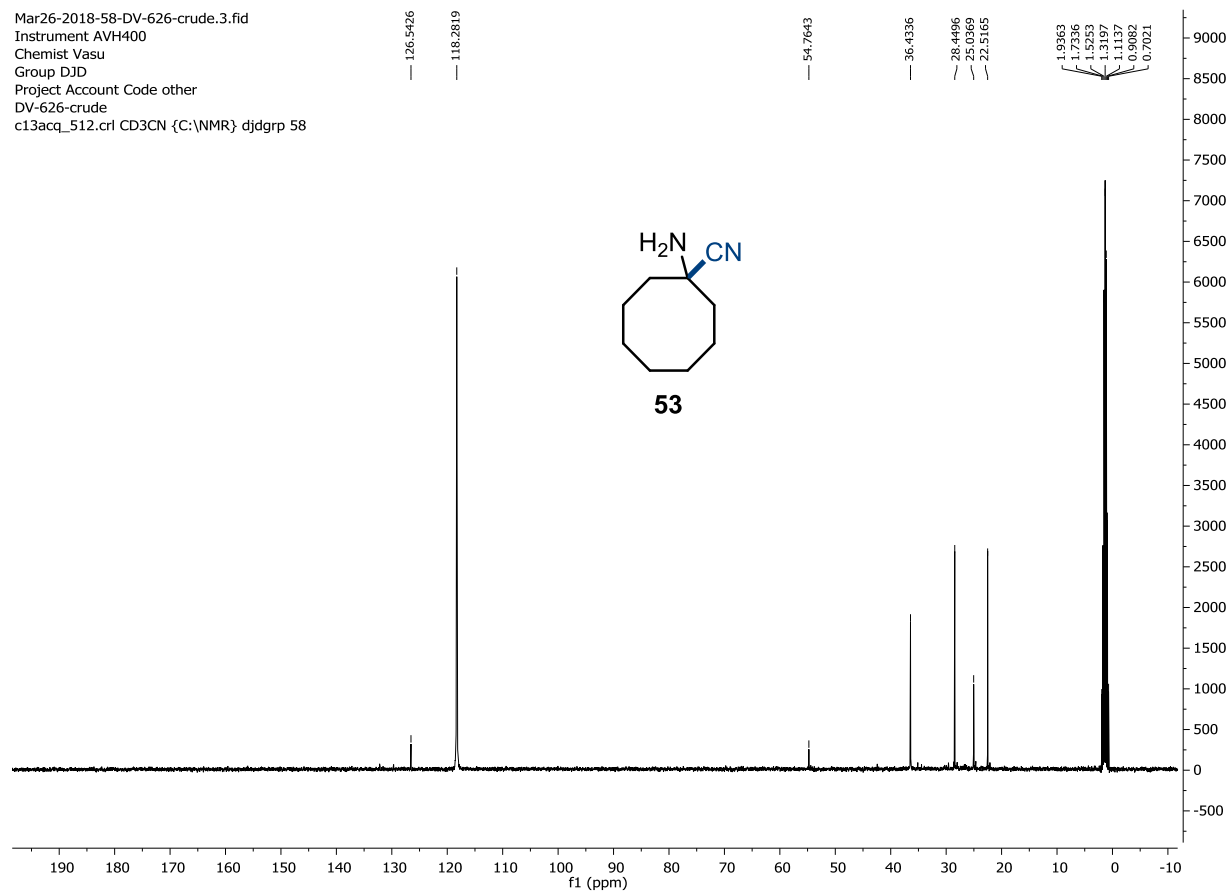

Mar07-2018-29-DV-603-2.1.fid  
Instrument AVH400  
Chemist Vasu  
Group DJD  
Project Account Code other  
DV-603-2  
h1acq.crl CDCl3 {C:\NMR} djgrp 29

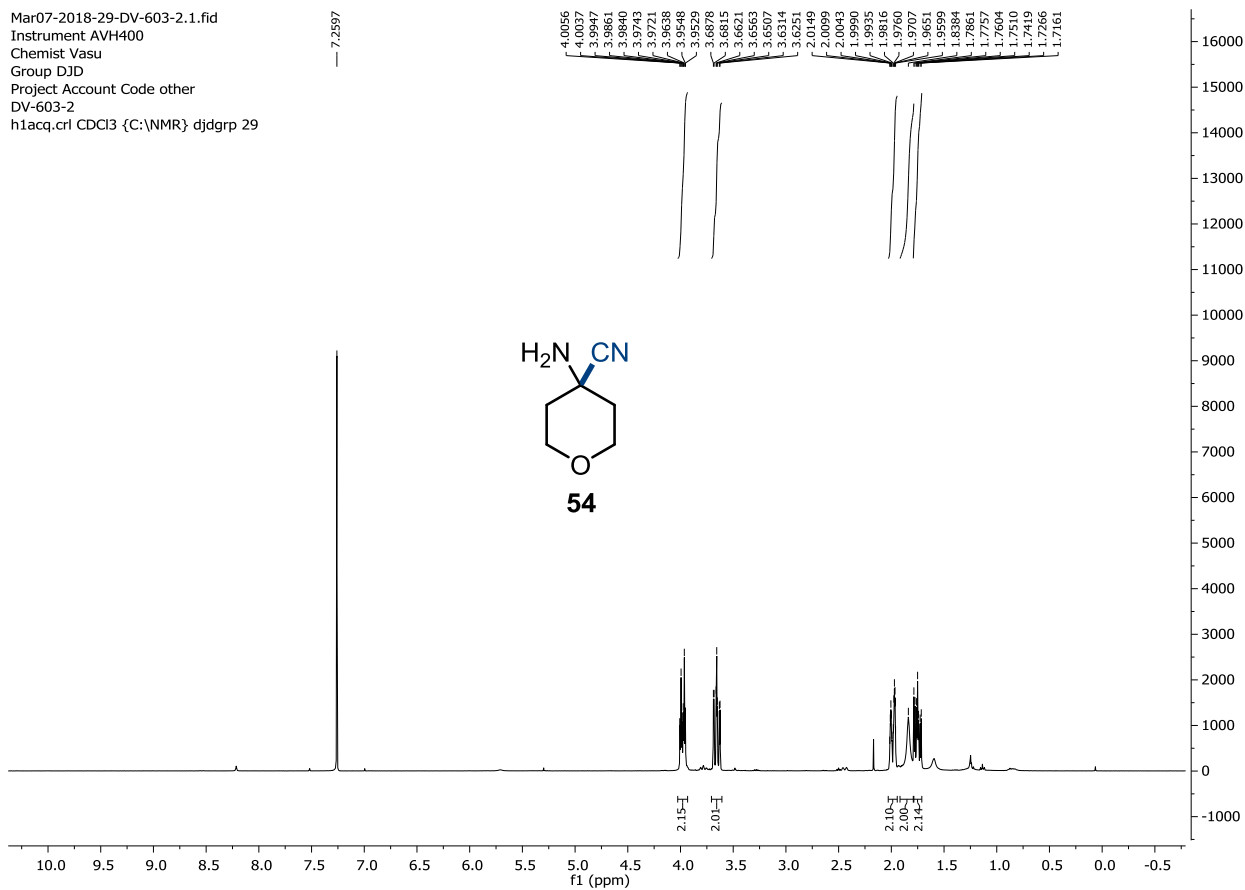

Mar07-2018-29-DV-603-2.2.fid  
Instrument AVH400  
Chemist Vasu  
Group DJD  
Project Account Code other  
DV-603-2  
c13acq\_512.crl CDCl3 {C:\NMR} djgrp 29

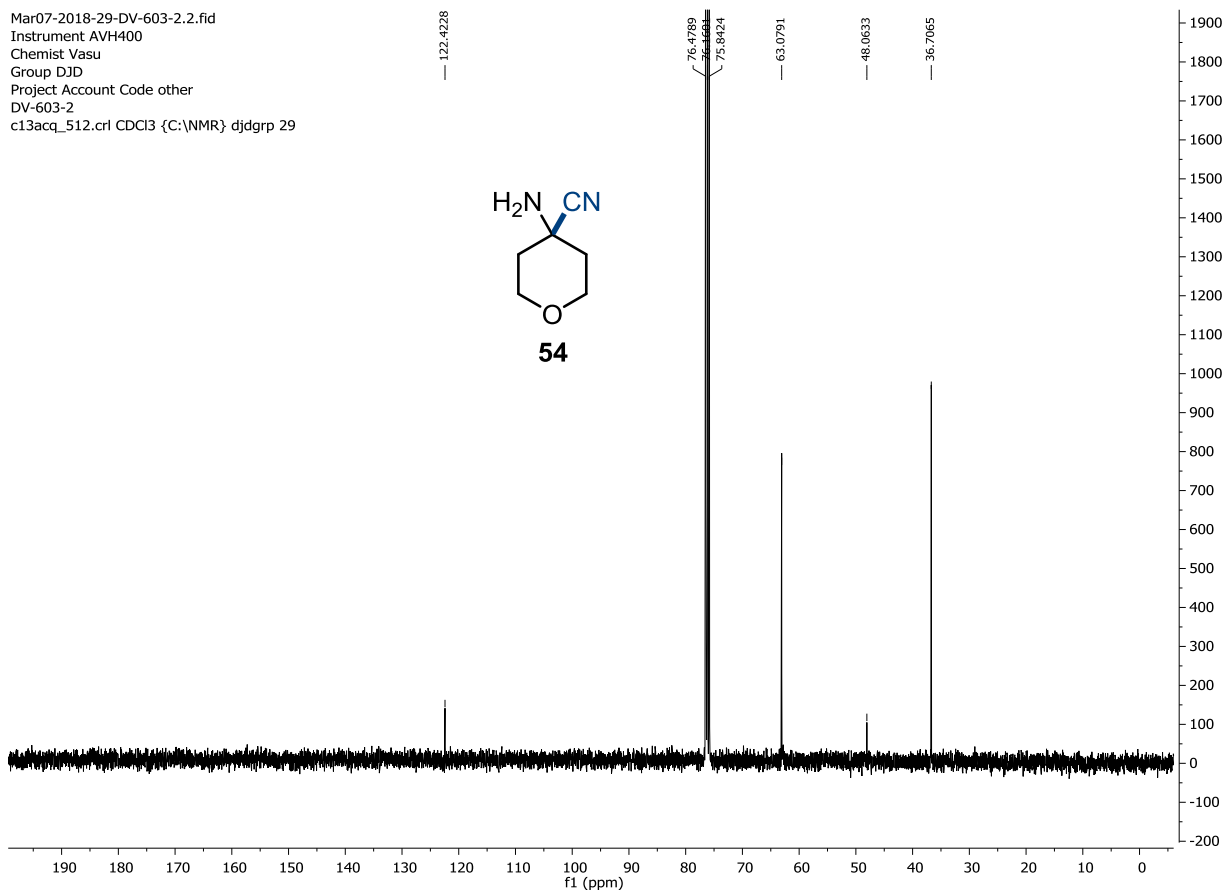

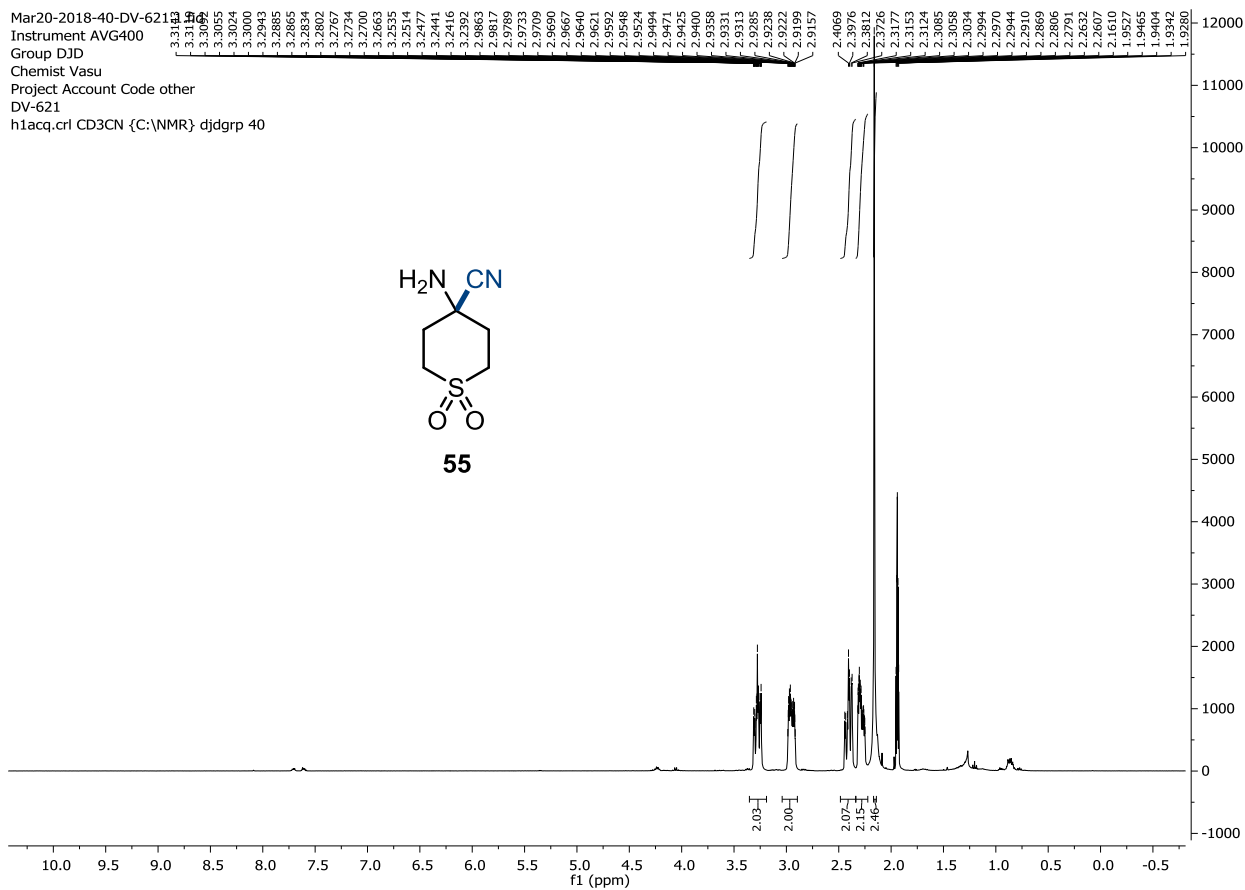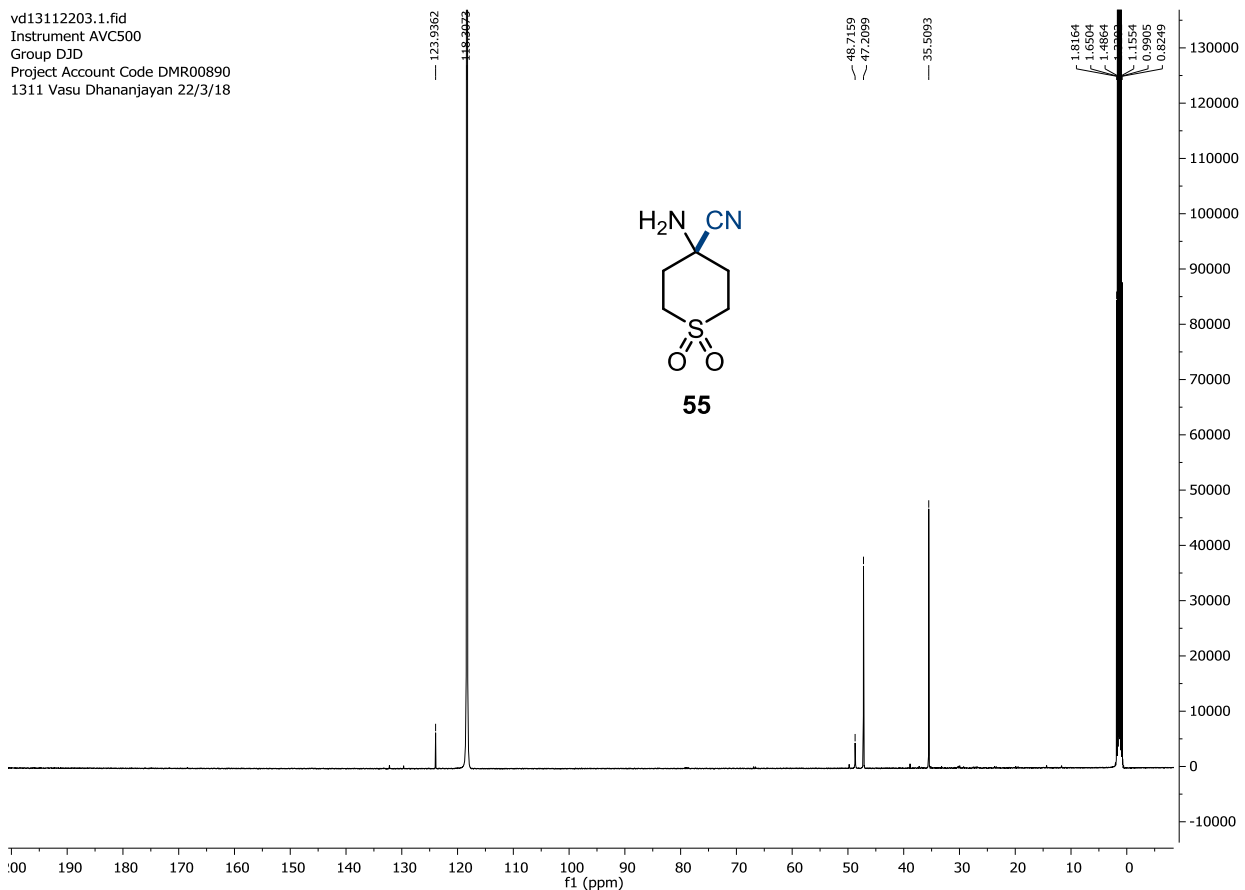

May03-2018-37-DV-639.6.fid  
Instrument AVH400  
Chemist Vasu  
Group DJD  
Project Account Code other  
DV-639-1  
h1acq.crl CDCl3 {C:\NMR} djgrp 37

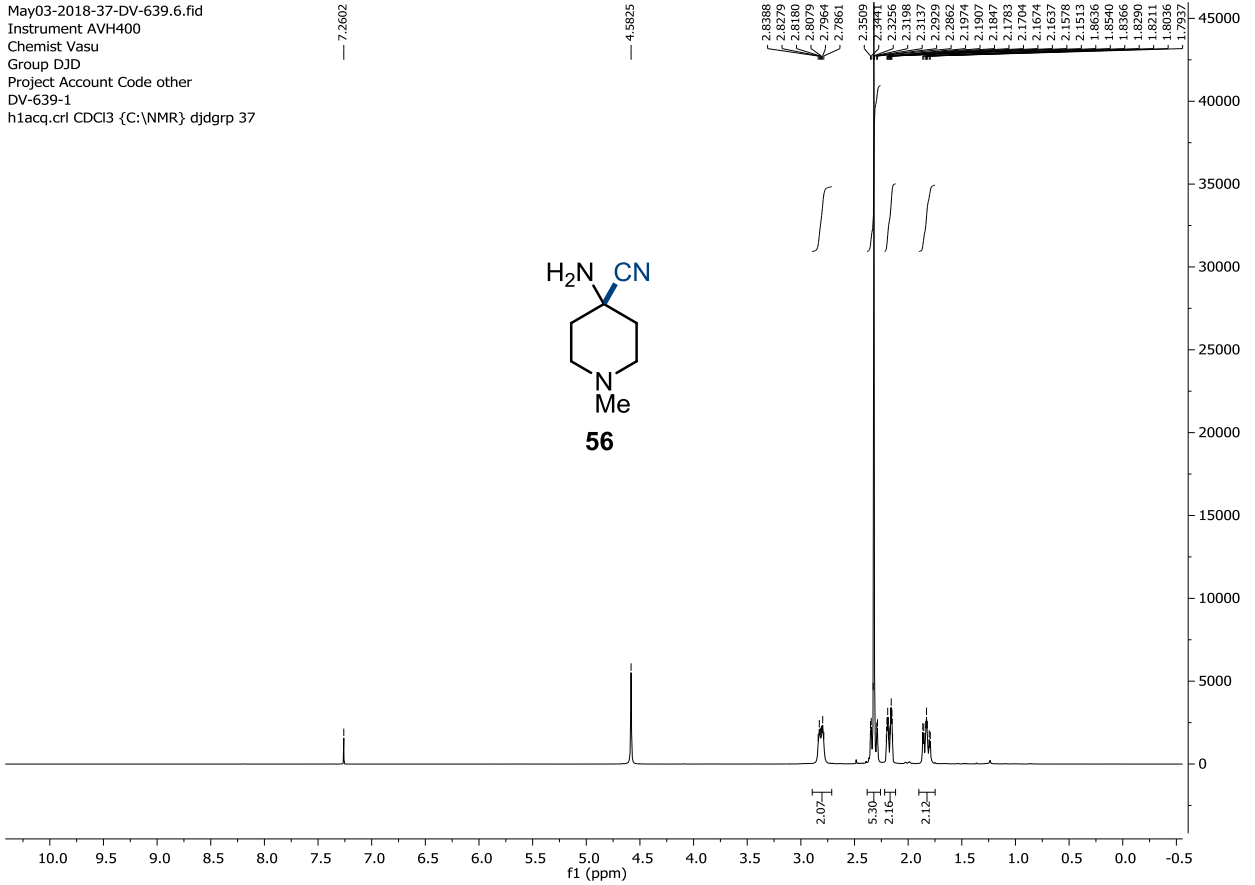

May03-2018-24-DV-639.2.fid  
Instrument AVH400  
Chemist Vasu  
Group DJD  
Project Account Code other  
DV-639  
c13acq\_512.crl CDCl3 {C:\NMR} djgrp 24

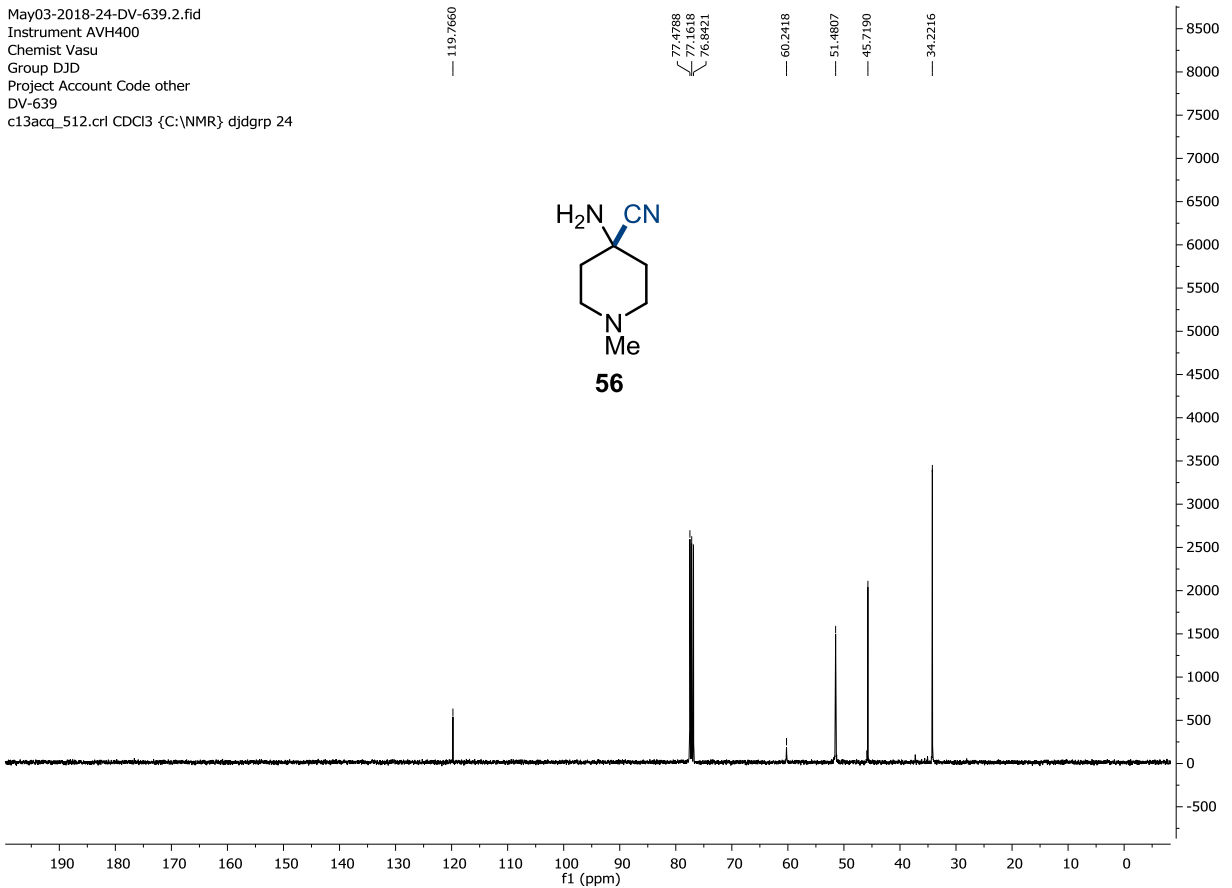

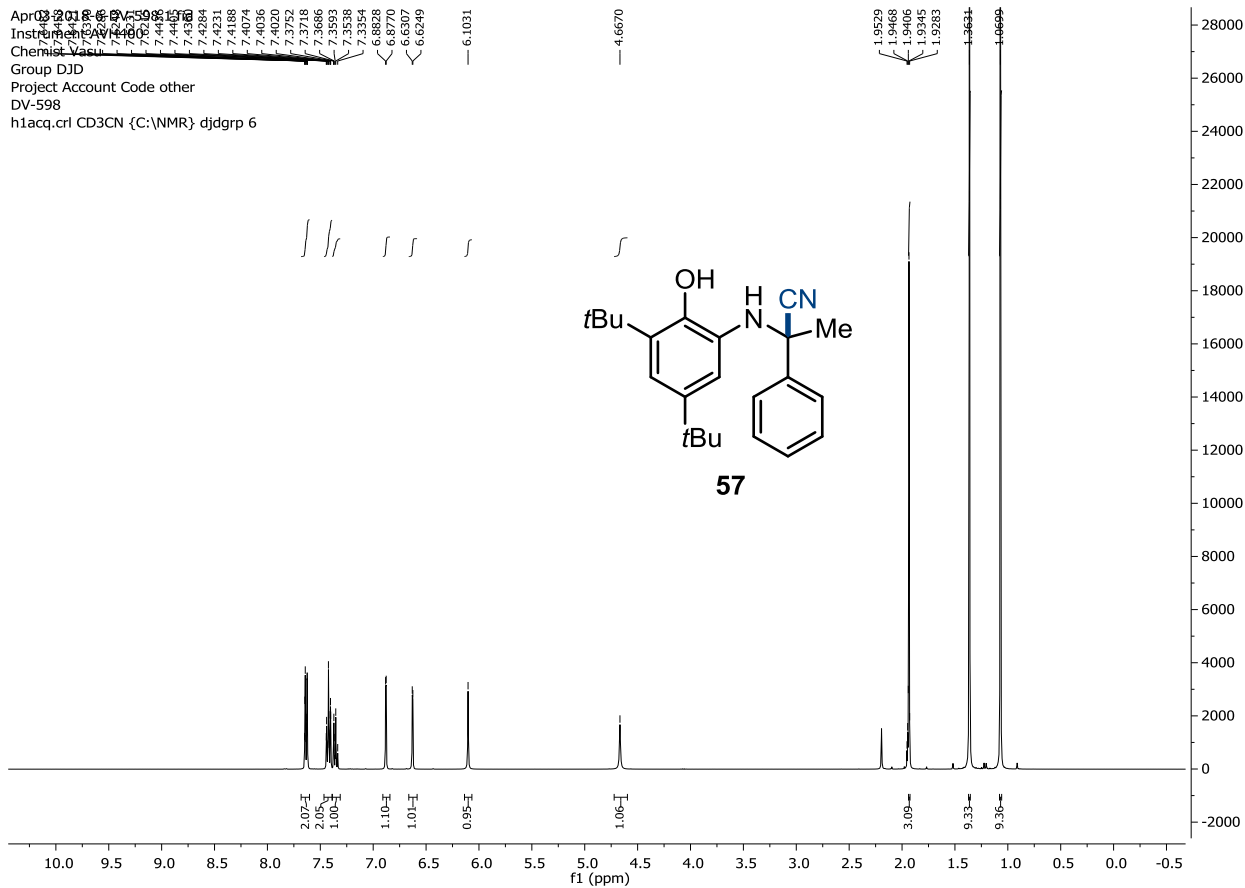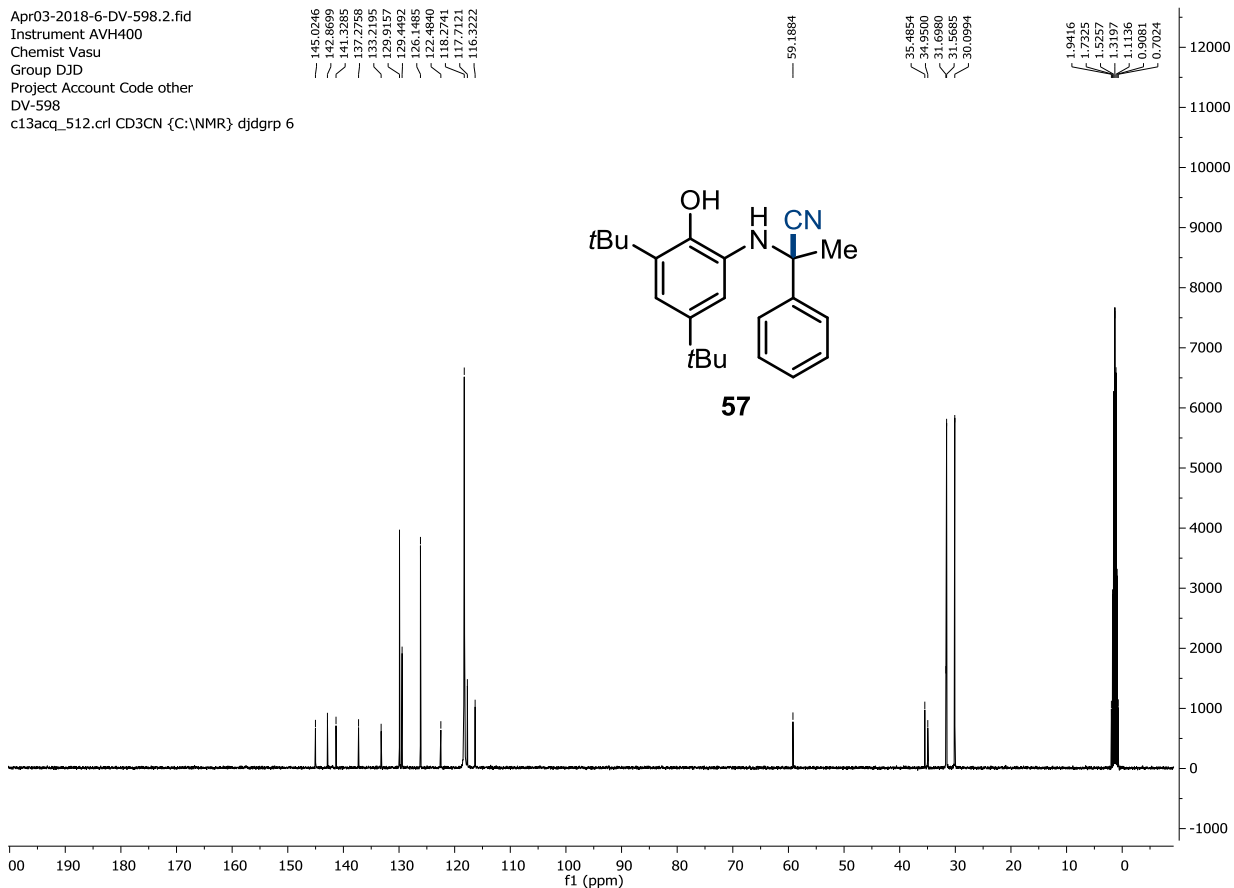

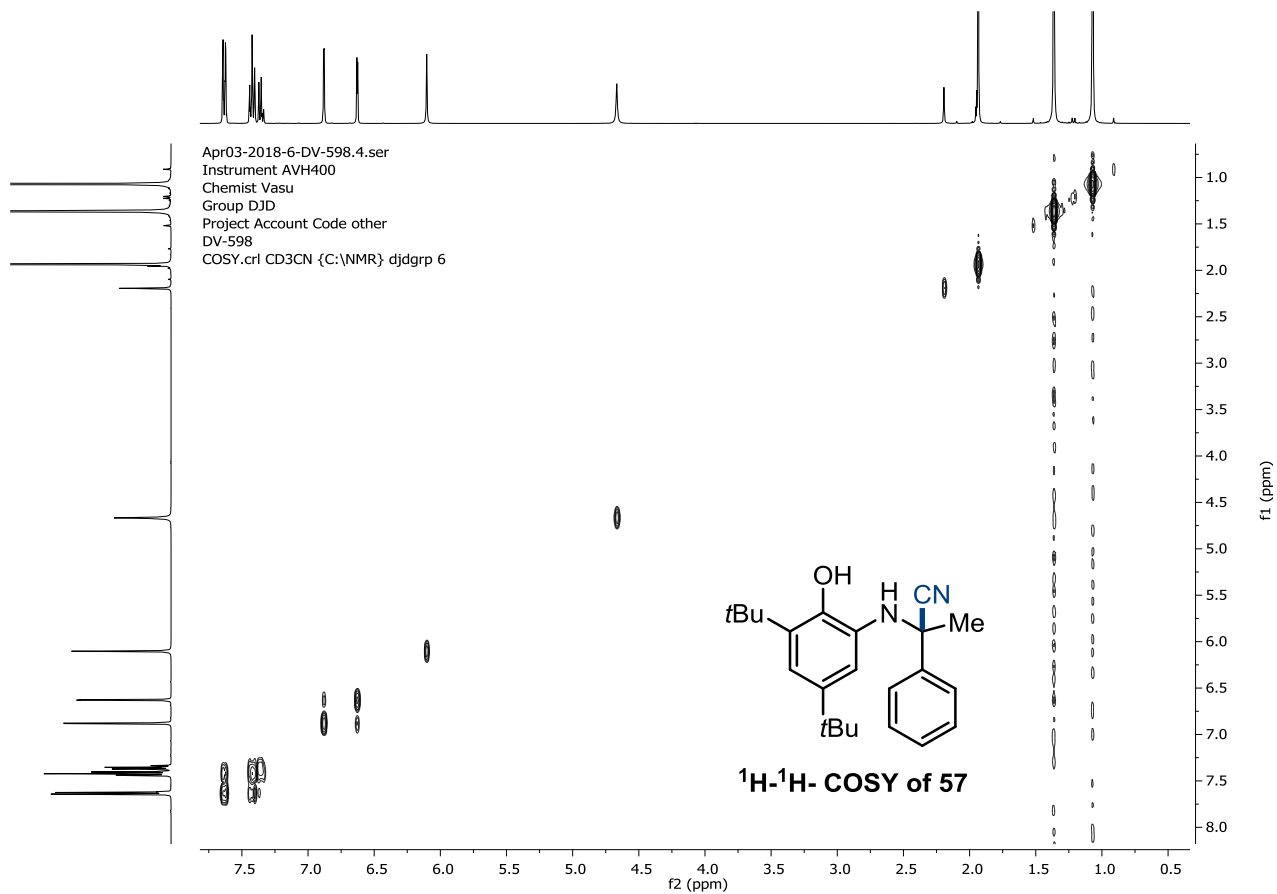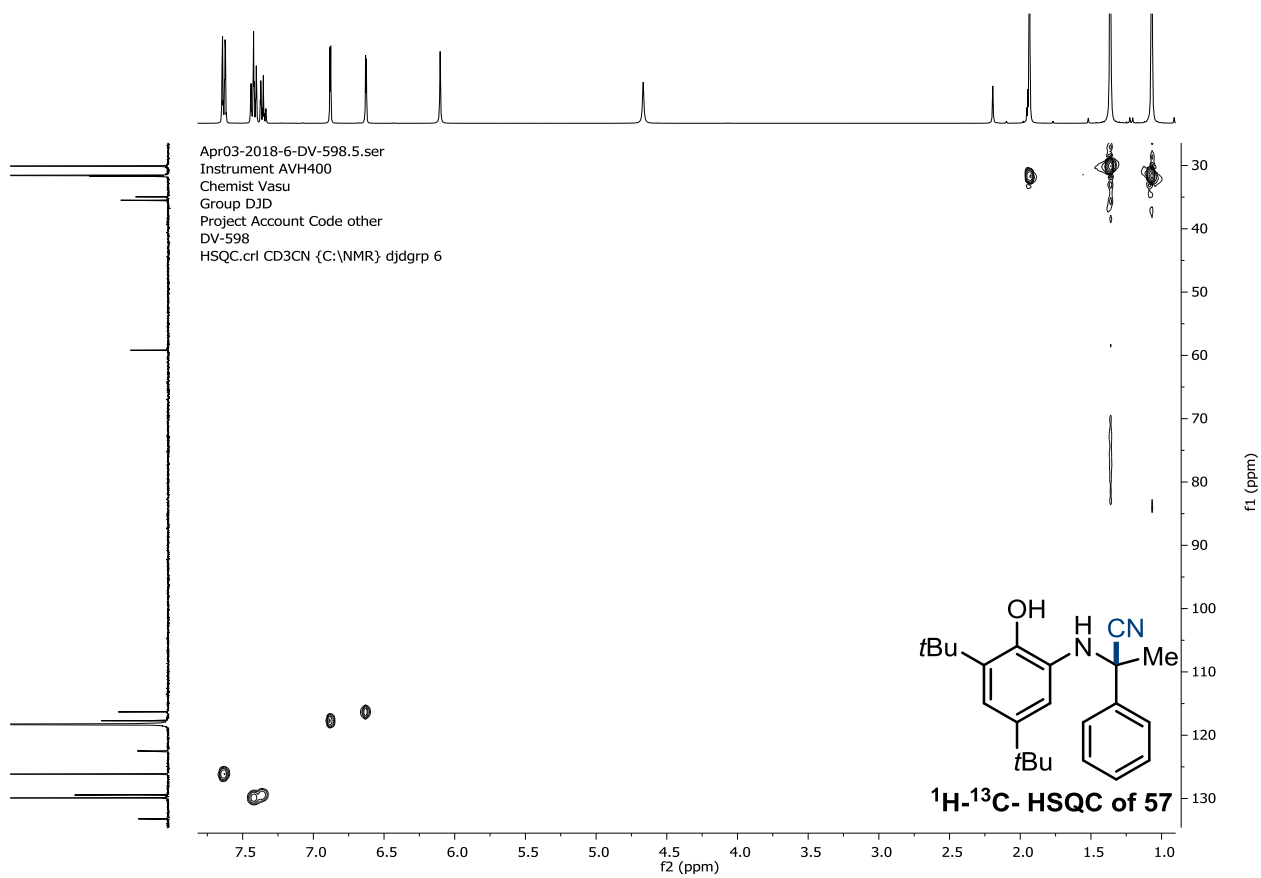

May25-2018-60-JL-2-030-F.1.1.1r  
Instrument AVG400  
Group DJD  
Chemist JAL  
Project Account Code Other  
h1acq.crl CD3CN {C:\NMR} djdgrp 60

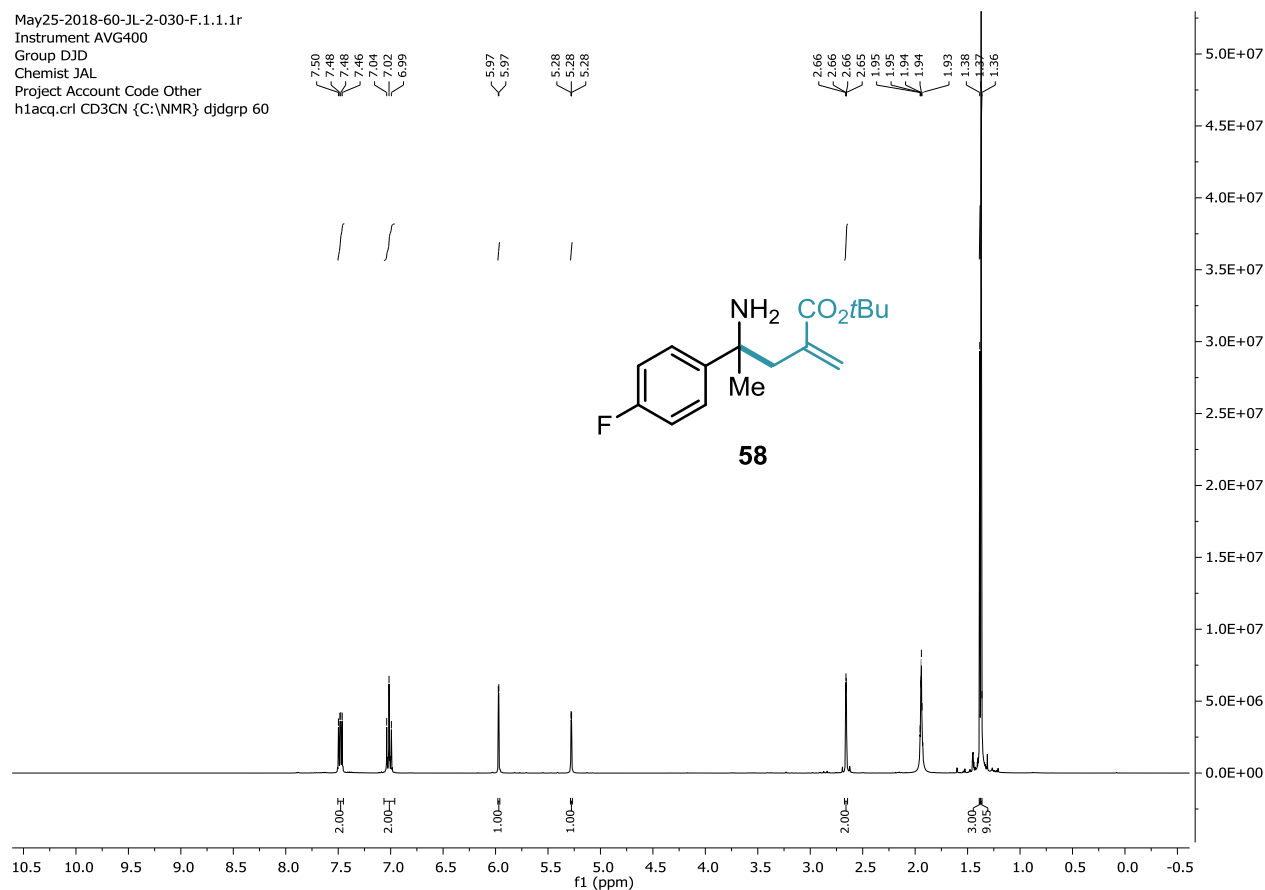

May16-2018-37-JL-2-026-A.2.1.1r  
Instrument AVG400  
Group DJD  
Chemist JAL  
Project Account Code Other  
f19acq.crl DMSO {C:\NMR} djdgrp 37

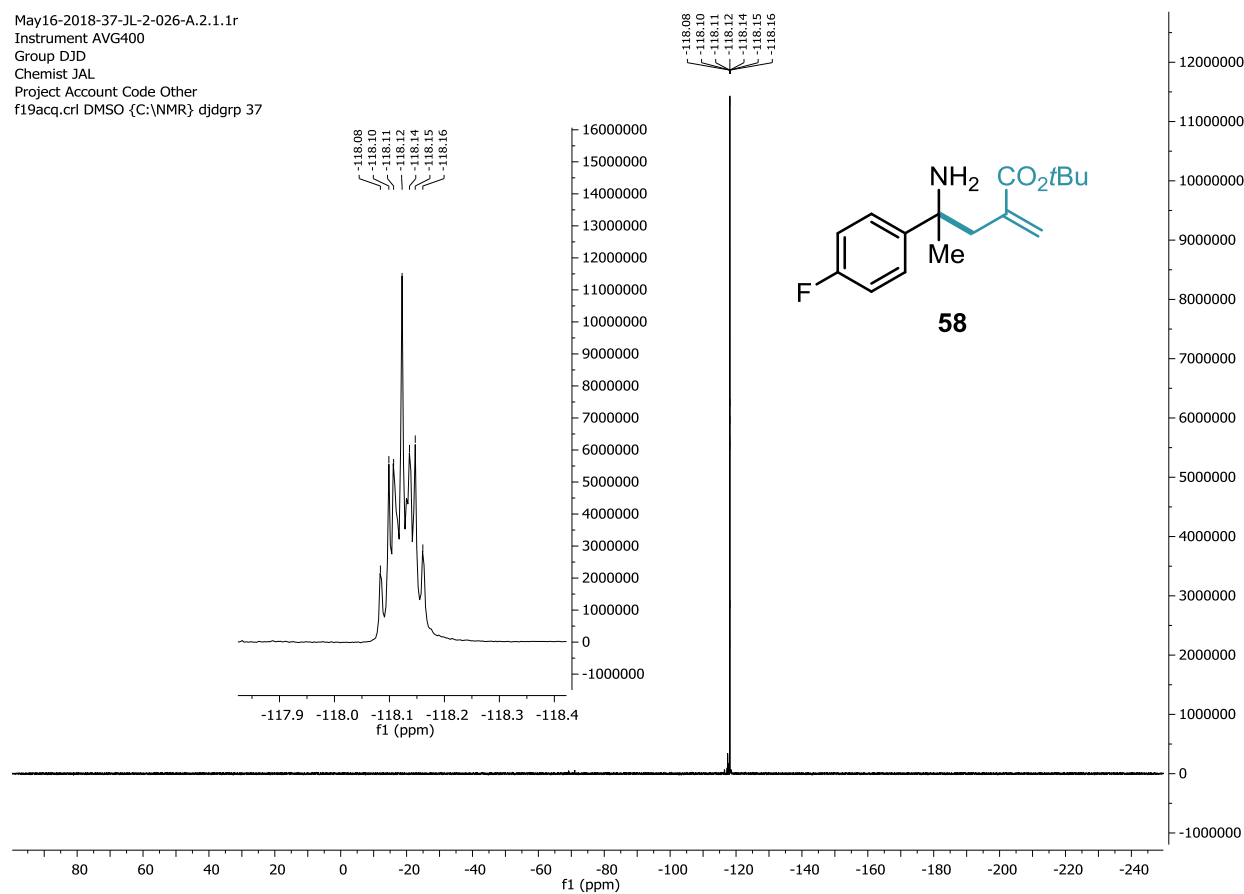



May25-2018-60-JL-2-030-F.2.1.1r  
Instrument AVG400  
Group DJD  
Chemist JAL  
Project Account Code Other  
c13acq\_512.crf CD3CN {C:\NMR} djgrp 60

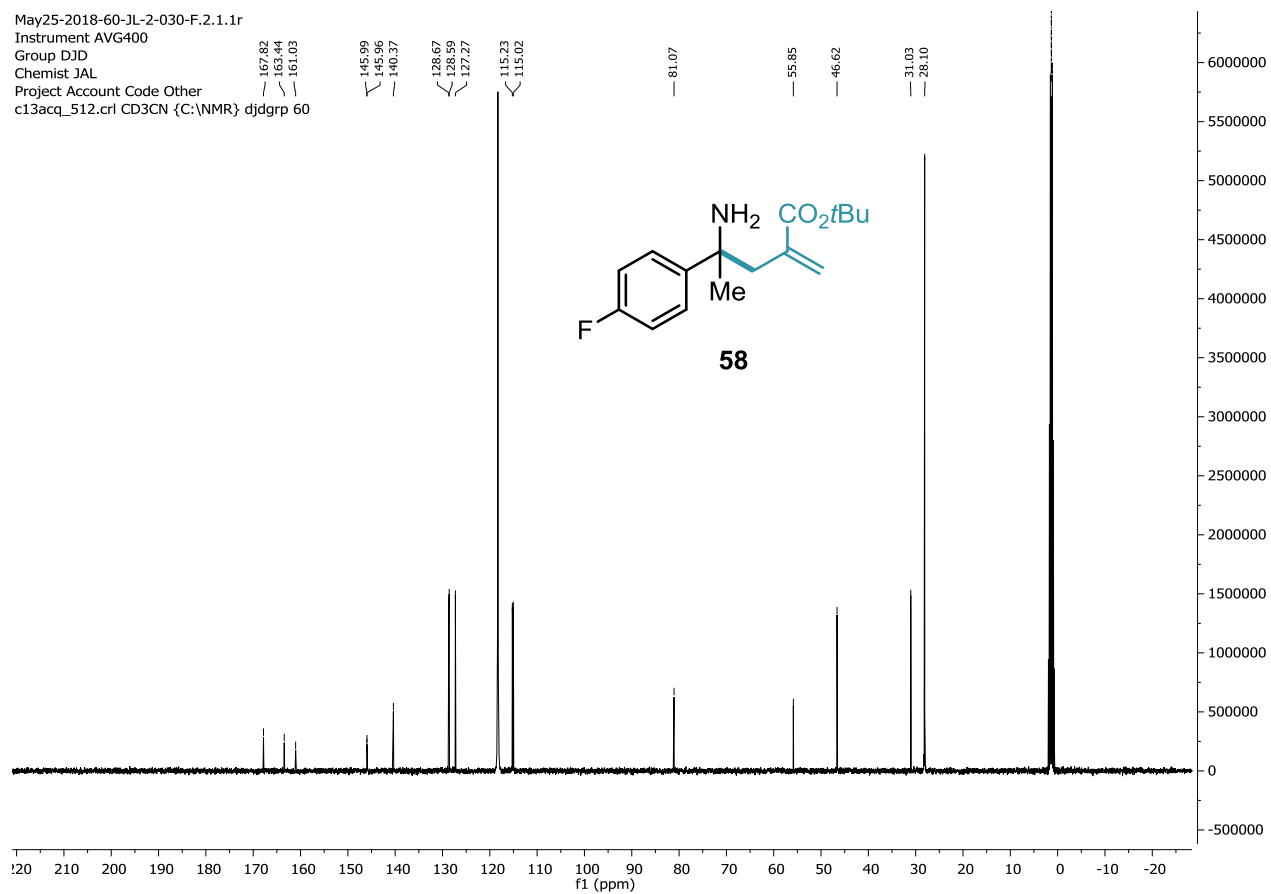

May31-2018-9-JL-2-033-Cl.1.1.1r  
 Instrument AVG400  
 Group DJD  
 Chemist JAL  
 Project Account Code Other  
 h1acq.crl CD3CN {C:\NMR} djdgrp 9

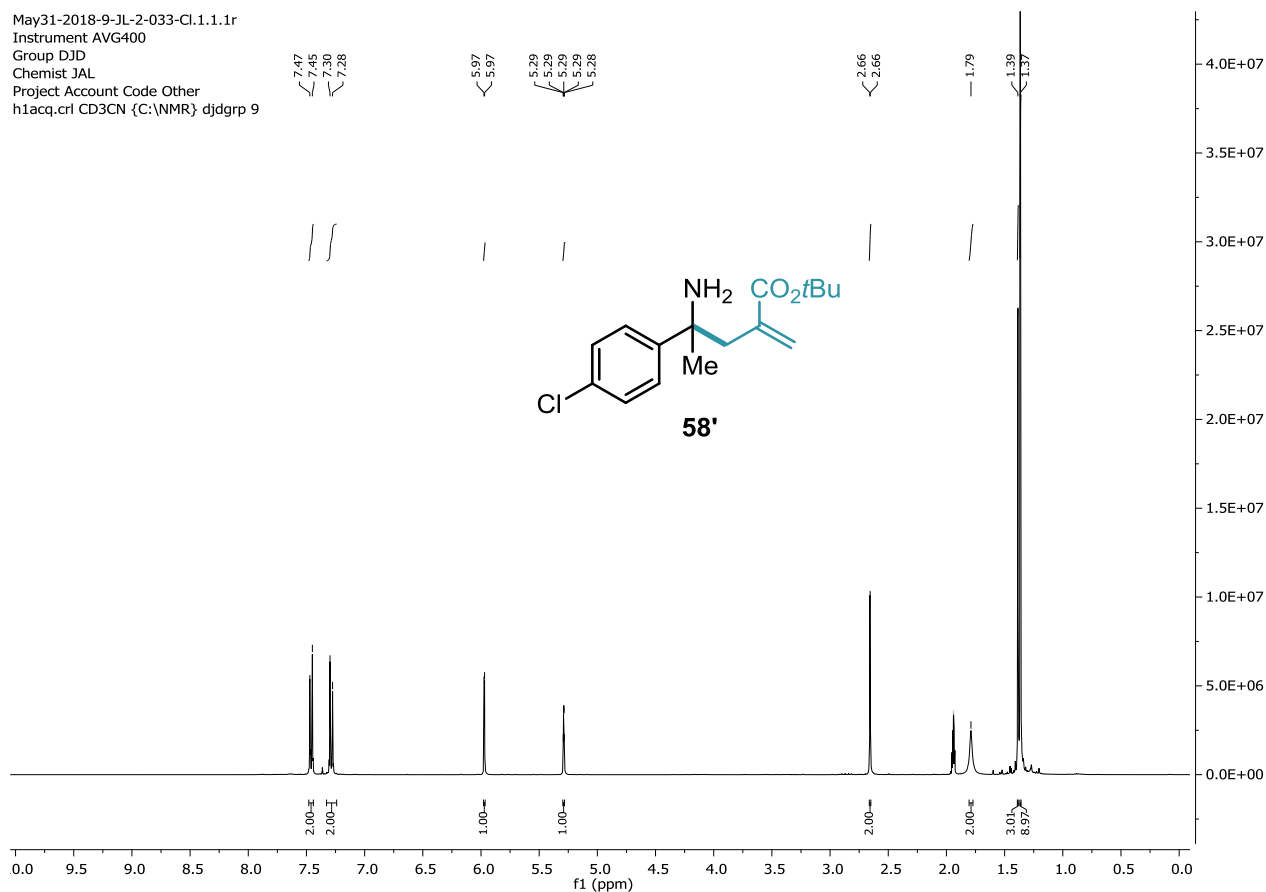

May31-2018-9-JL-2-033-Cl.2.1.1r  
 Instrument AVG400  
 Group DJD  
 Chemist JAL  
 Project Account Code Other  
 c13acq\_512.crl CD3CN {C:\NMR} djdgrp 9

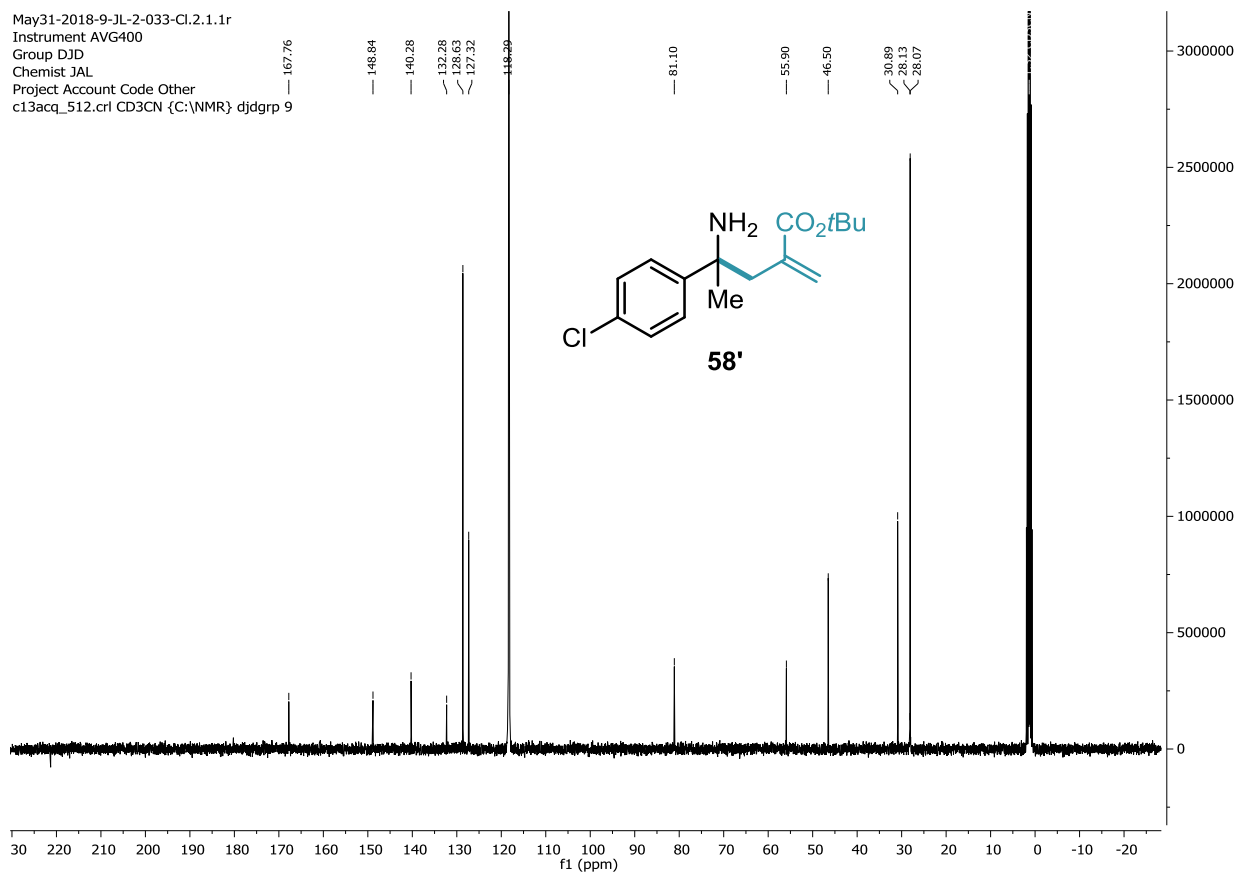

May29-2018-2-JL-2-031-Me.1.1.1r  
Instrument AVG400  
Group DJD  
Chemist JAL  
Project Account Code Other  
h1acq.crl CD3CN {C:\NMR} djdgrp 2

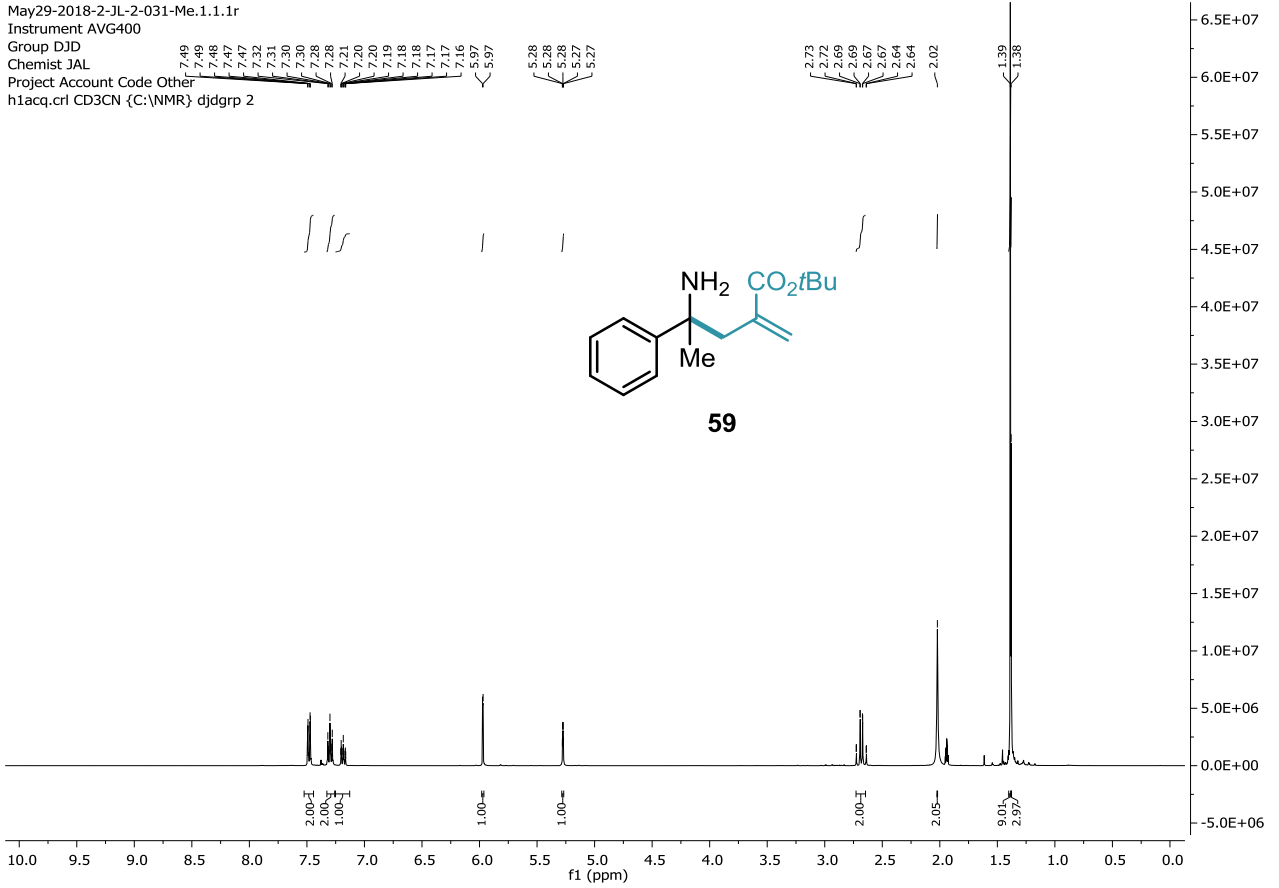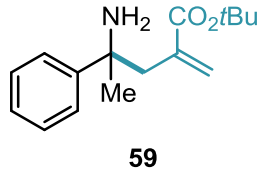

May29-2018-2-JL-2-031-Me.2.1.1r  
Instrument AVG400  
Group DJD  
Chemist JAL  
Project Account Code Other  
c13acq\_512.crl CD3CN {C:\NMR} djdgrp 2

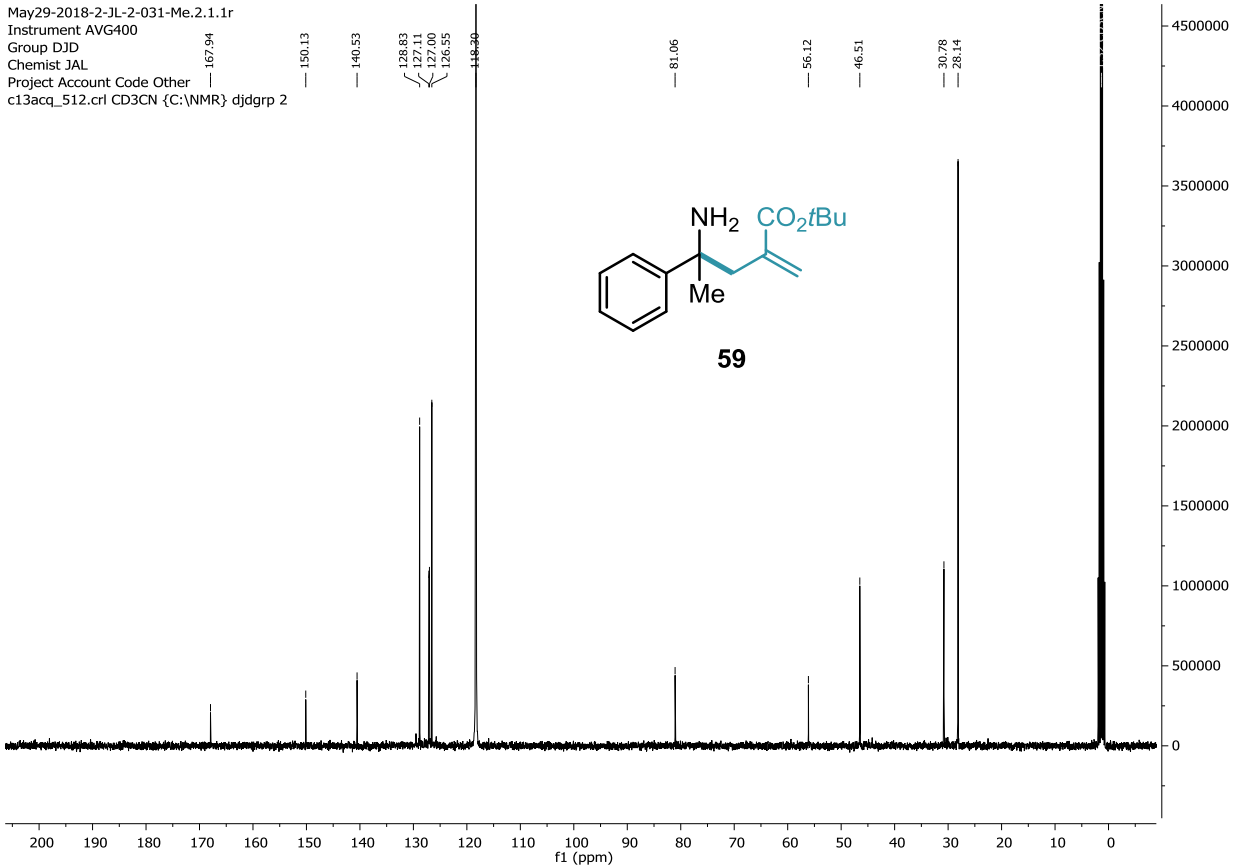

May25-2018-59-JL-2-030-OMe.1.1.1r  
 Instrument AVG400  
 Group DJD  
 Chemist JAL  
 Project Account Code Other  
 h1acq.crl CD3CN {C:\NMR} djdgrp 59

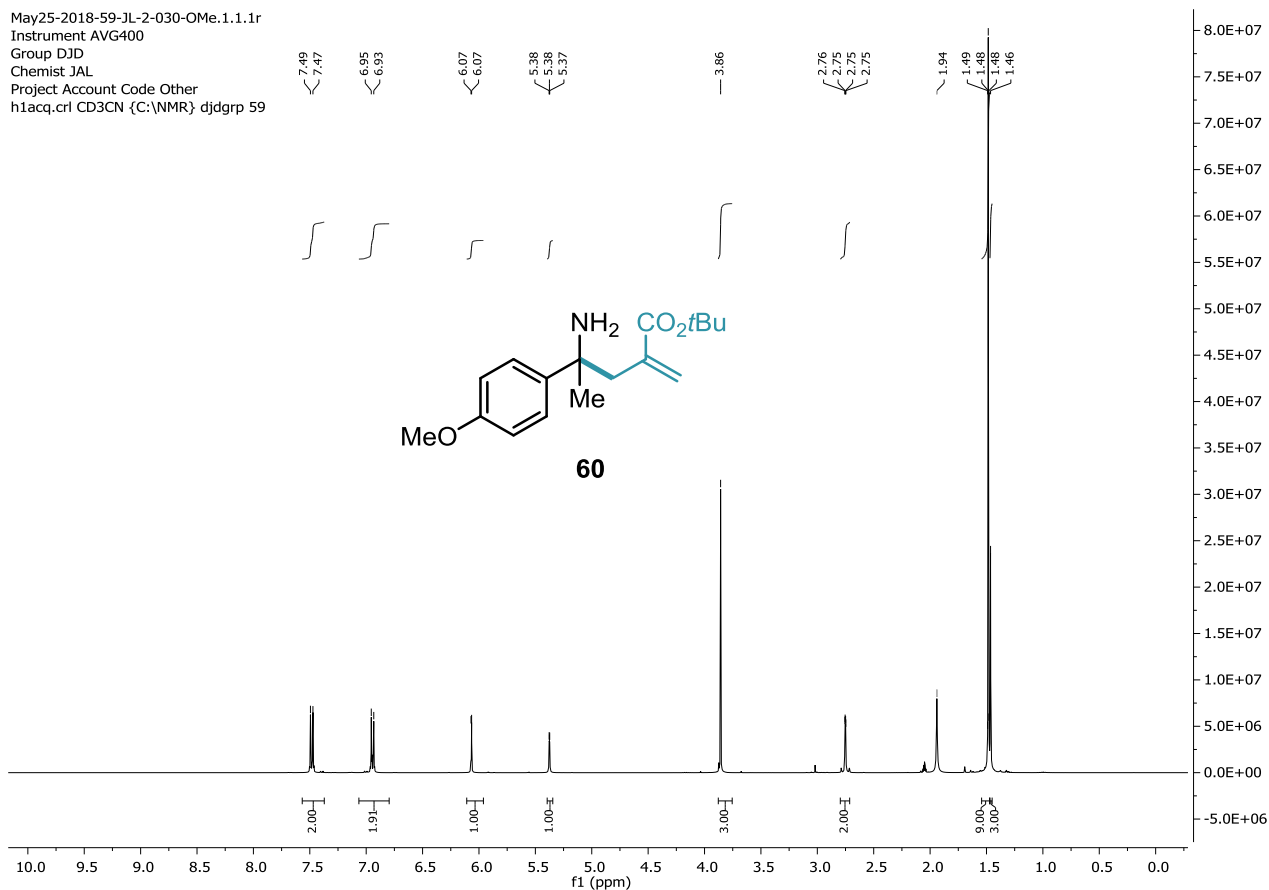

May25-2018-59-JL-2-030-OMe.2.1.1r  
 Instrument AVG400  
 Group DJD  
 Chemist JAL  
 Project Account Code Other  
 c13acq\_512.crl CD3CN {C:\NMR} djdgrp 59

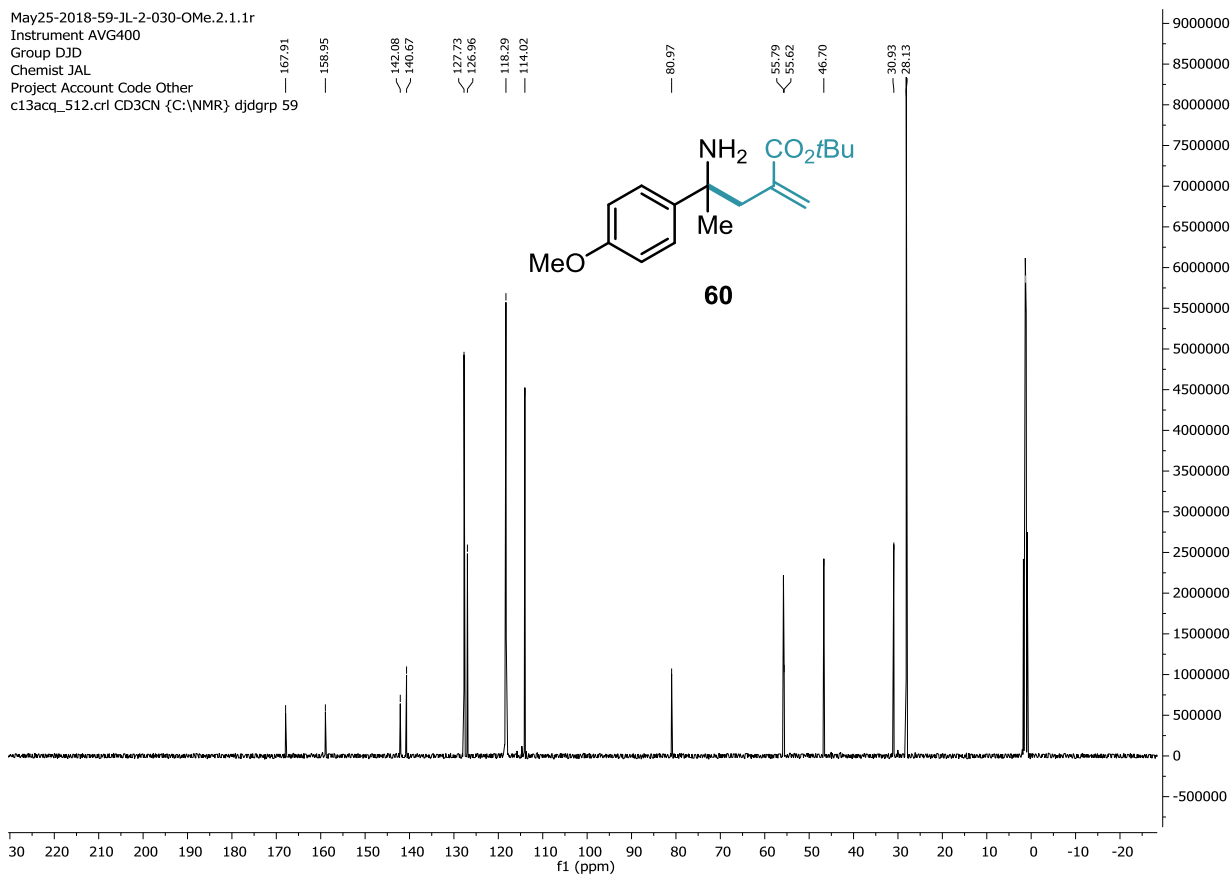

May29-2018-3-JL-2-032-H.1.1.1r  
 Instrument AVG400  
 Group DJD  
 Chemist JAL  
 Project Account Code Other  
 h1acq.crl CD3CN {C:\NMR} djgrp 3

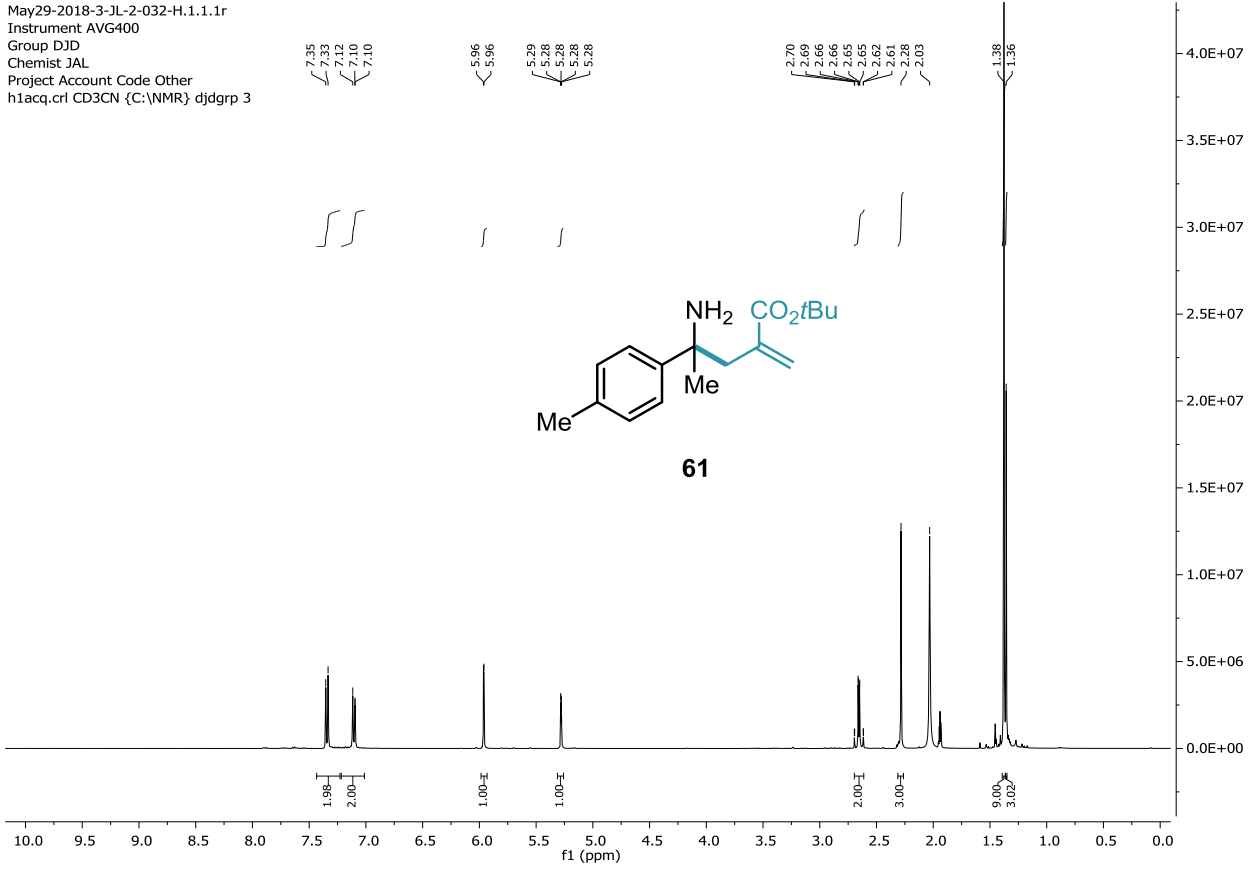

May29-2018-3-JL-2-032-H.2.1.1r  
 Instrument AVG400  
 Group DJD  
 Chemist JAL  
 Project Account Code Other  
 c13acq\_512.crl CD3CN {C:\NMR} djgrp 3

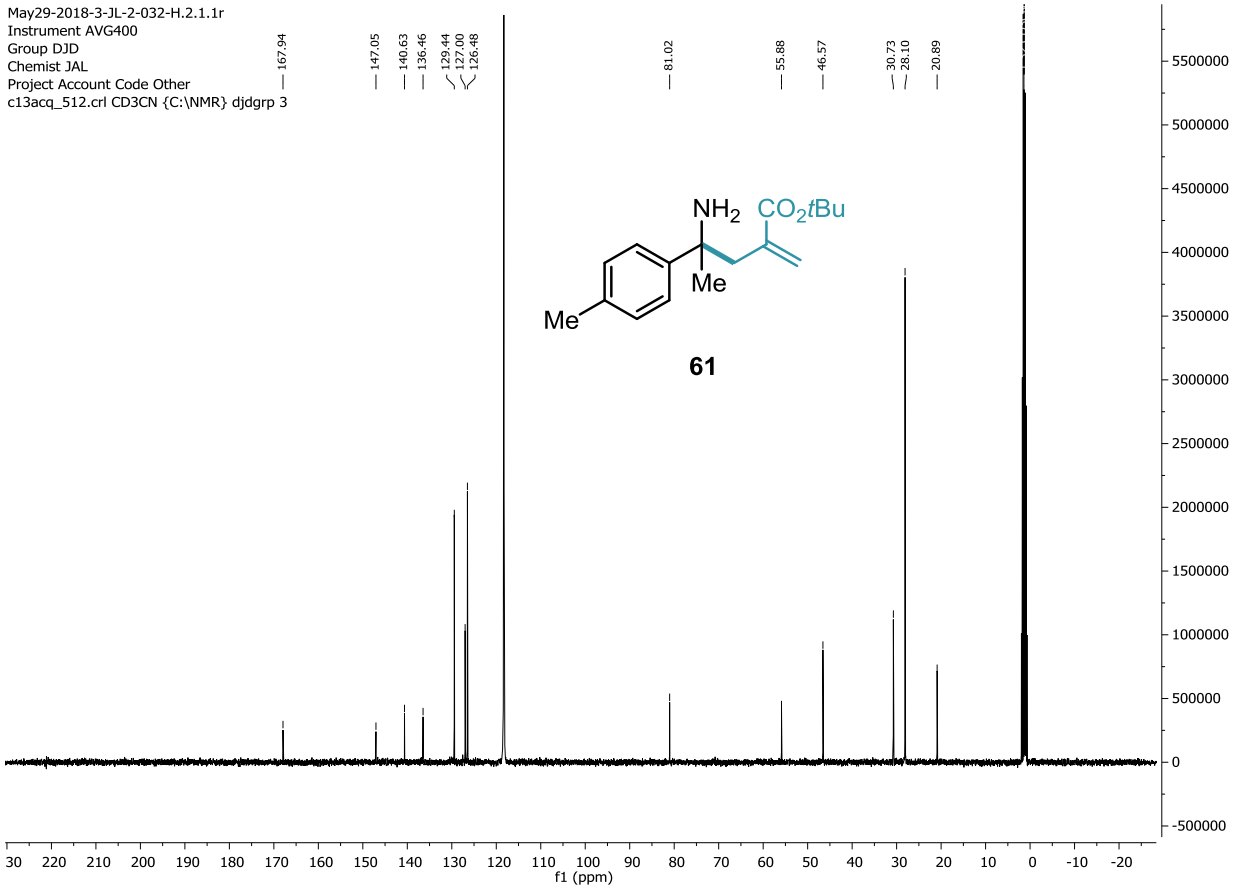

May31-2018-10-JL-2-035-Indane.1.1.1r  
 Instrument AVG400  
 Group DJD  
 Chemist JAL  
 Project Account Code Other  
 h1acq.crl CD3CN {C:\NMR} djdgrp 10

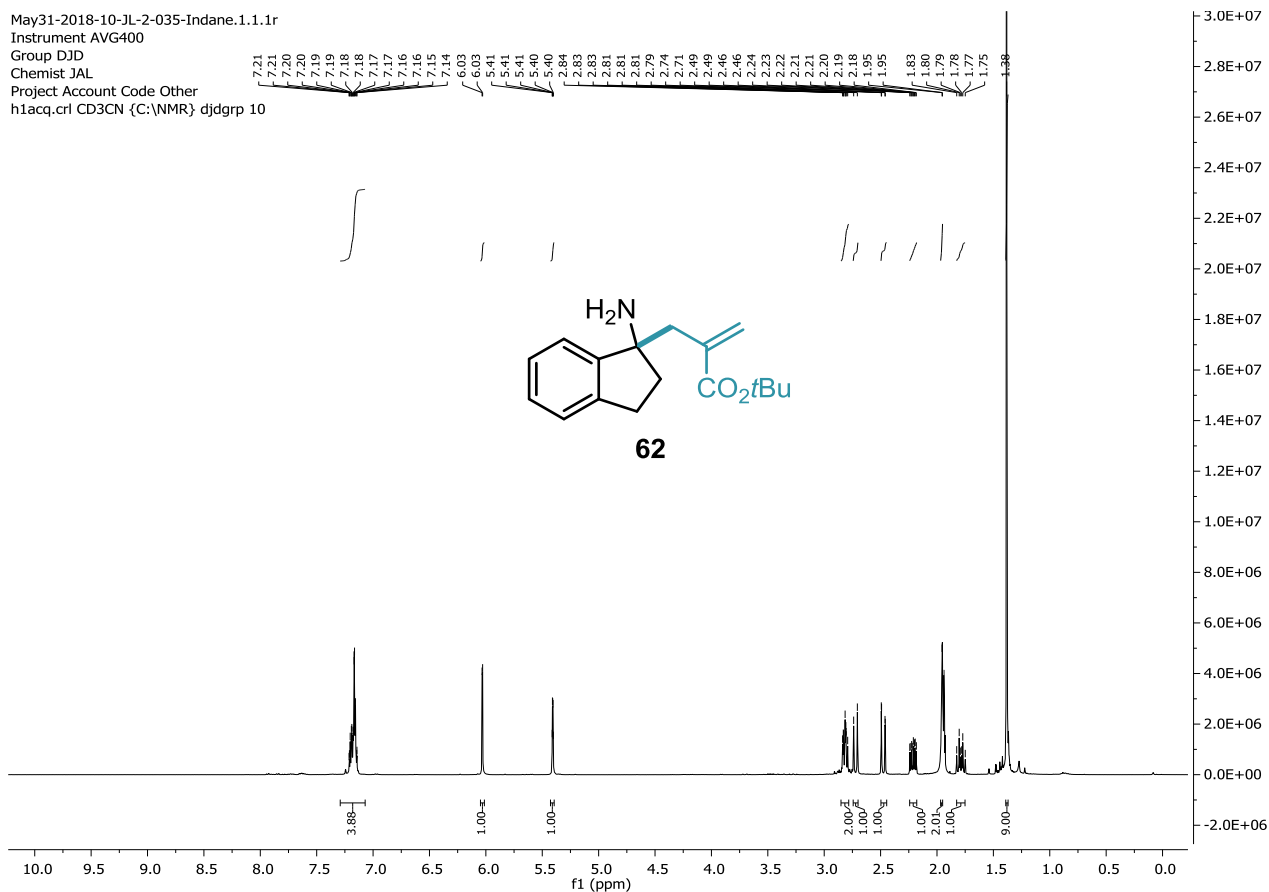

May31-2018-10-JL-2-035-Indane.2.1.1r  
 Instrument AVG400  
 Group DJD  
 Chemist JAL  
 Project Account Code Other  
 c13acq\_512.crl CD3CN {C:\NMR} djdgrp 10

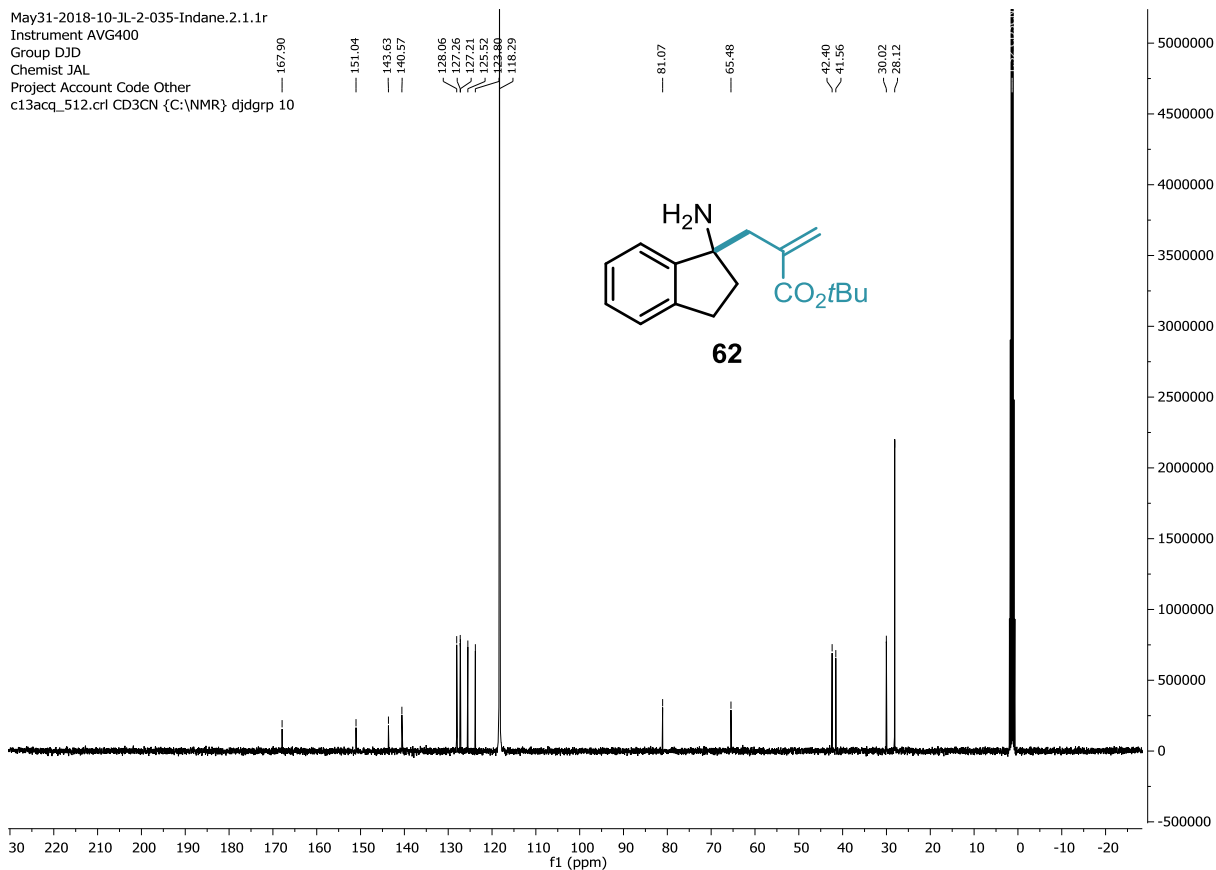

Jun01-2018-3-JL-2-042-OMe-Cy.2.1.1r  
Instrument AVH400  
Chemist JAL  
Group DJD  
Project Account Code Other  
h1acq.crl CD3CN {C:\NMR} djdgrp 3

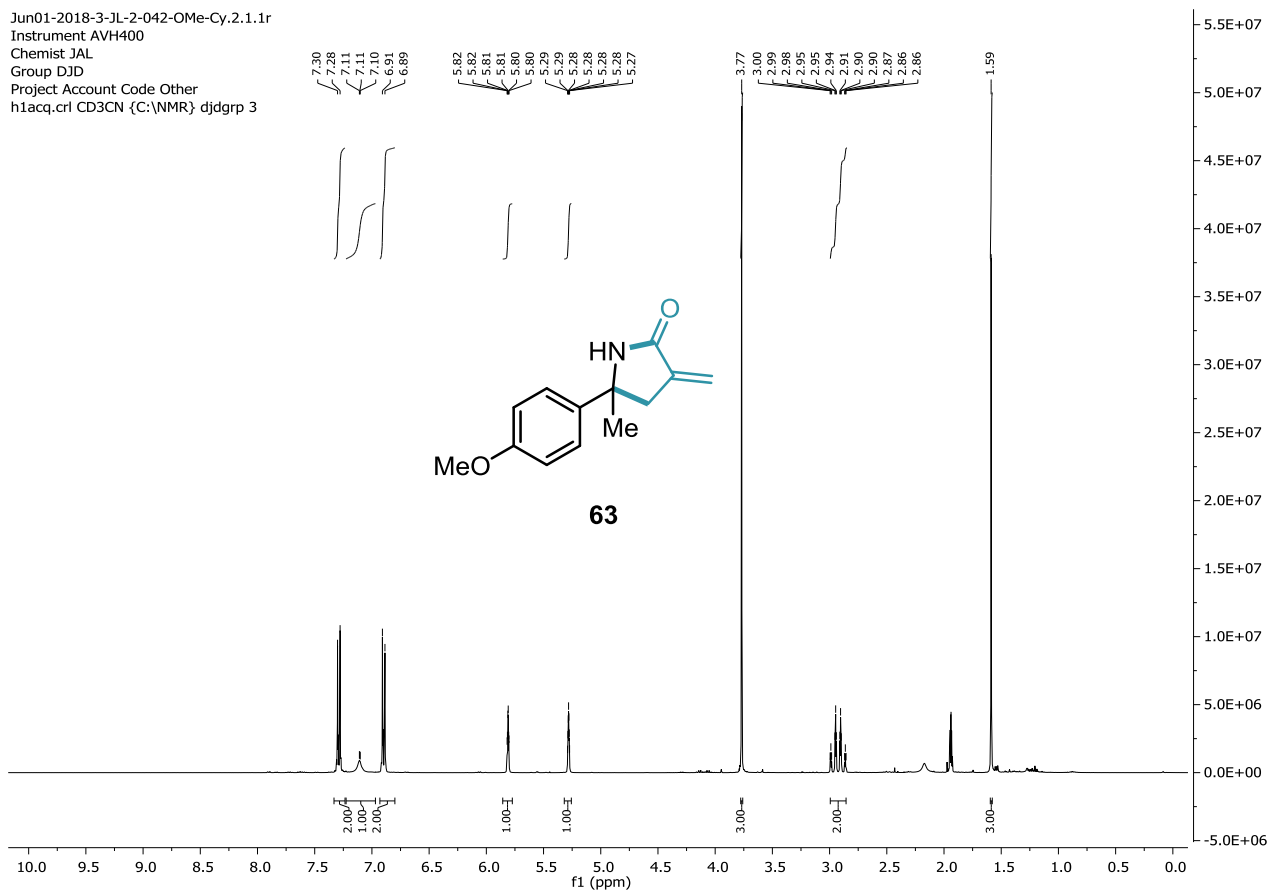

Jun01-2018-3-JL-2-042-OMe-Cy.1.1.1r  
Instrument AVH400  
Chemist JAL  
Group DJD  
Project Account Code Other  
c13acq\_512.crl CD3CN {C:\NMR} djdgrp 3

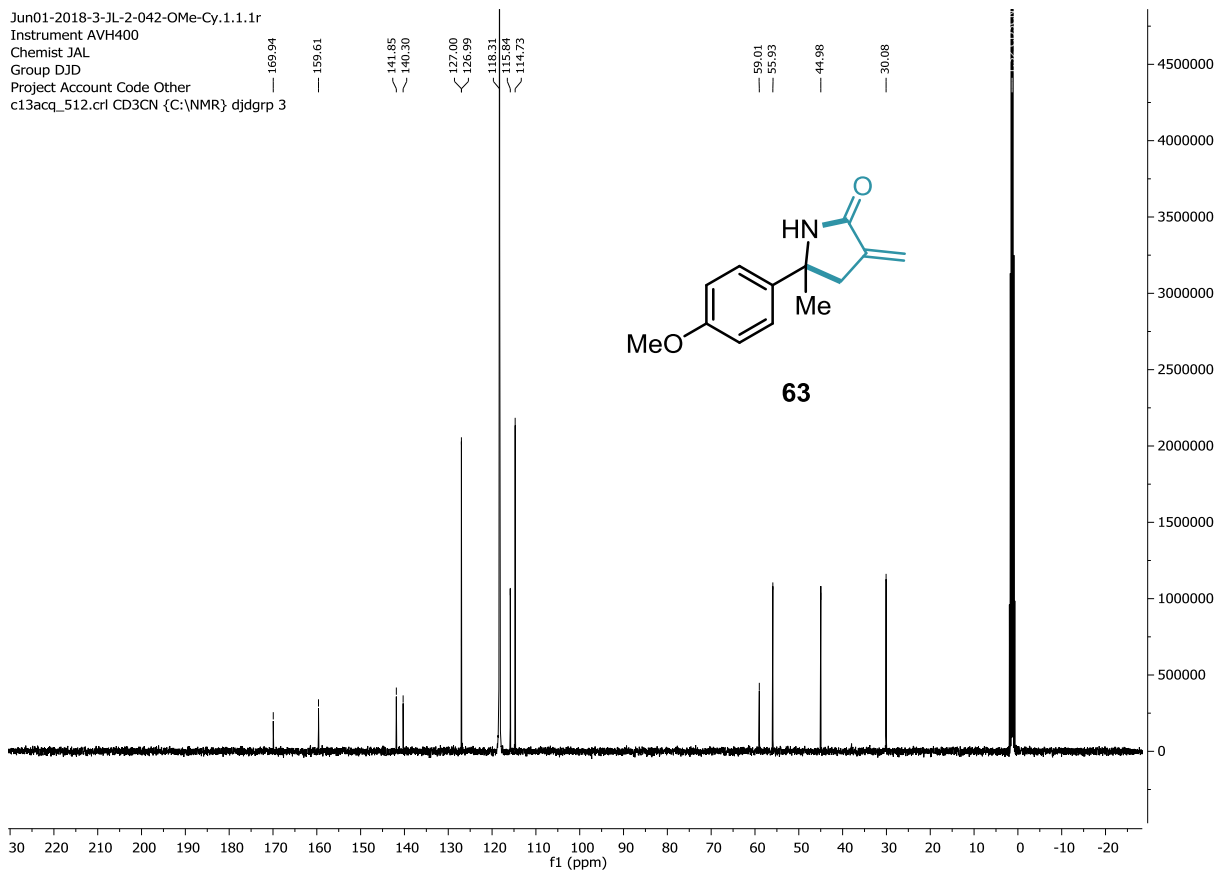

Dec13-2017-1-DV-478-2  
Instrument AVG400  
Group DJD  
Chemist Vasu  
Project Account Code other  
DV-478-2  
h1acq.crl CDCl3 {C:\NMR} djgrp 1

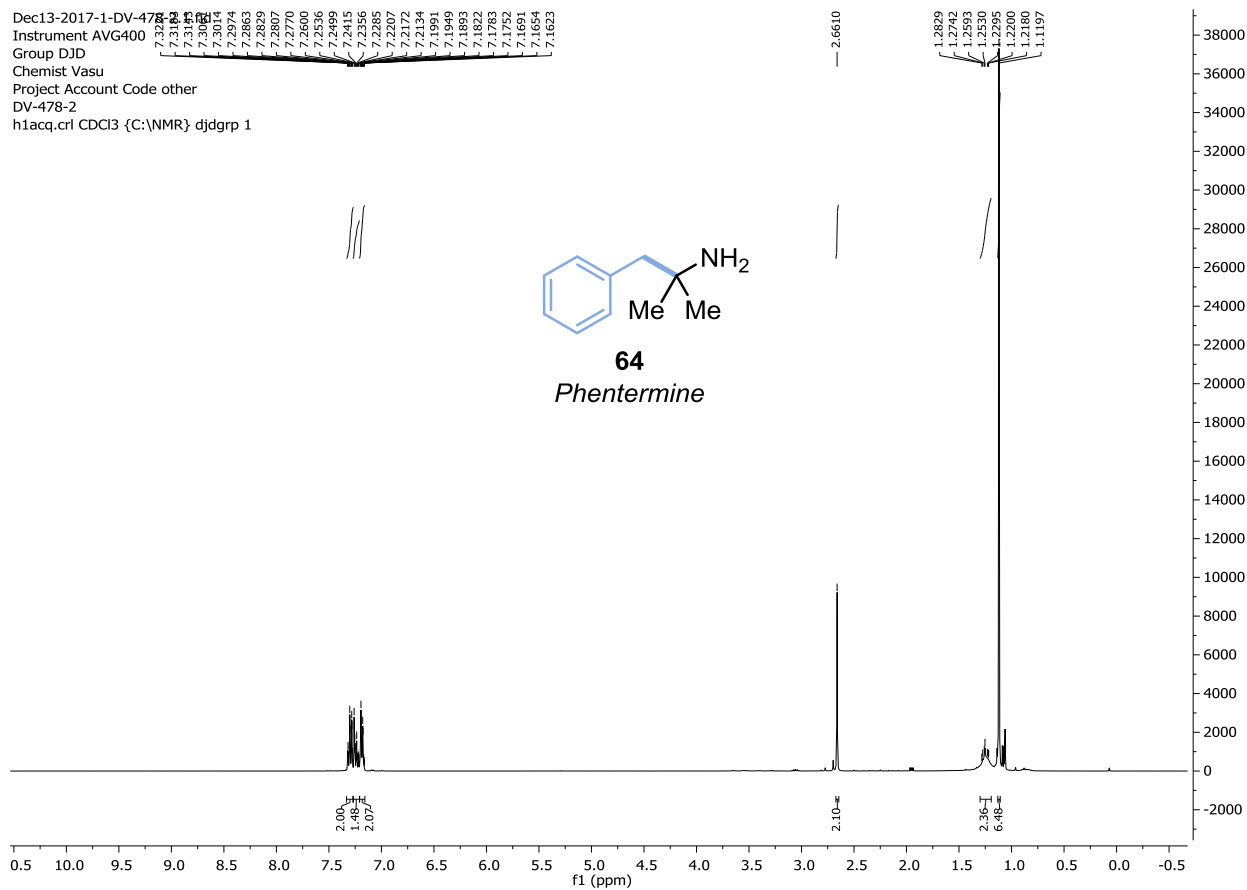

Dec13-2017-1-DV-478-2.2.fid  
Instrument AVG400  
Group DJD  
Chemist Vasu  
Project Account Code other  
DV-478-2  
c13acq\_256.crl CDCl3 {C:\NMR} djgrp 1

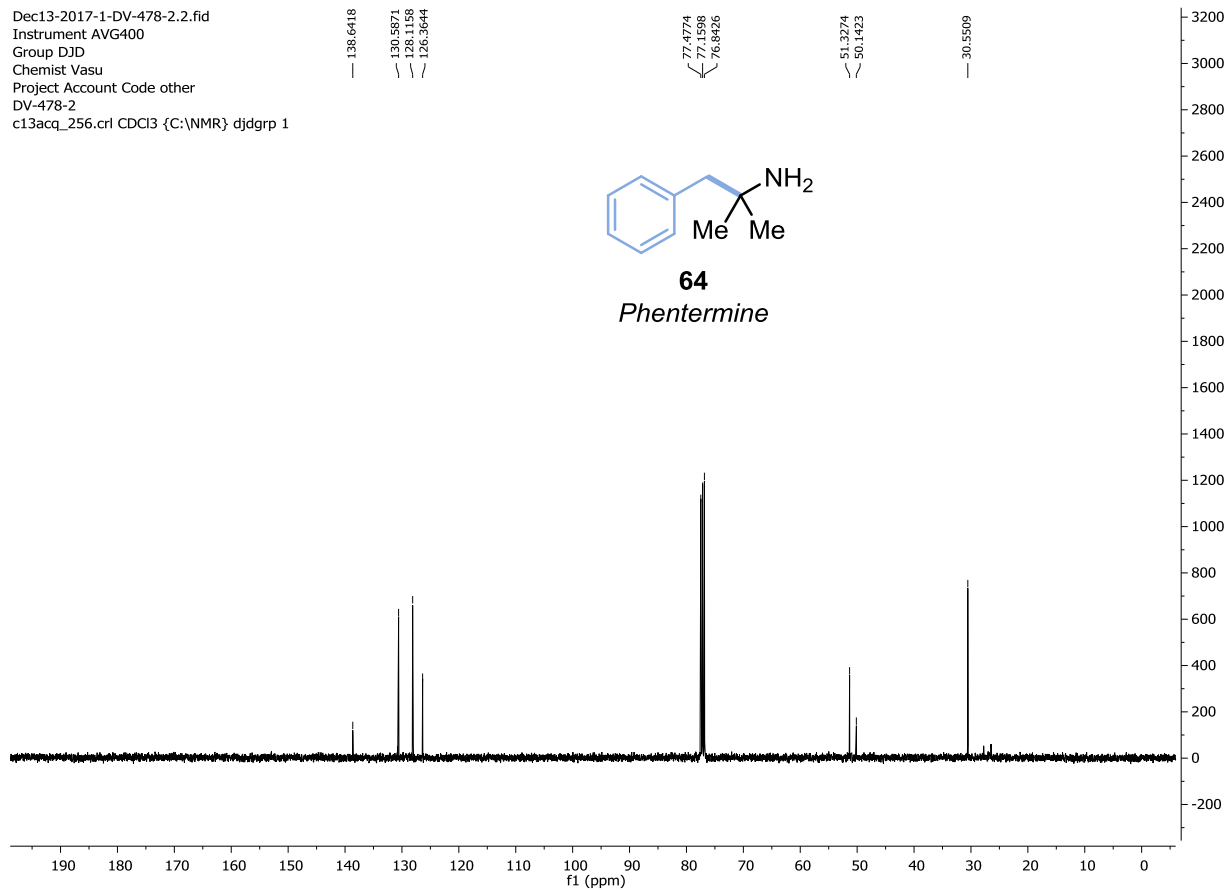



Nov09-2017-11-DV-474-HCl.1.fid  
Instrument AVH400  
Chemist Vasu  
Group DJD  
Project Account Code other  
DV-474-HCl  
h1acq.crl CDCl3 {C:\NMR} djgrp 11

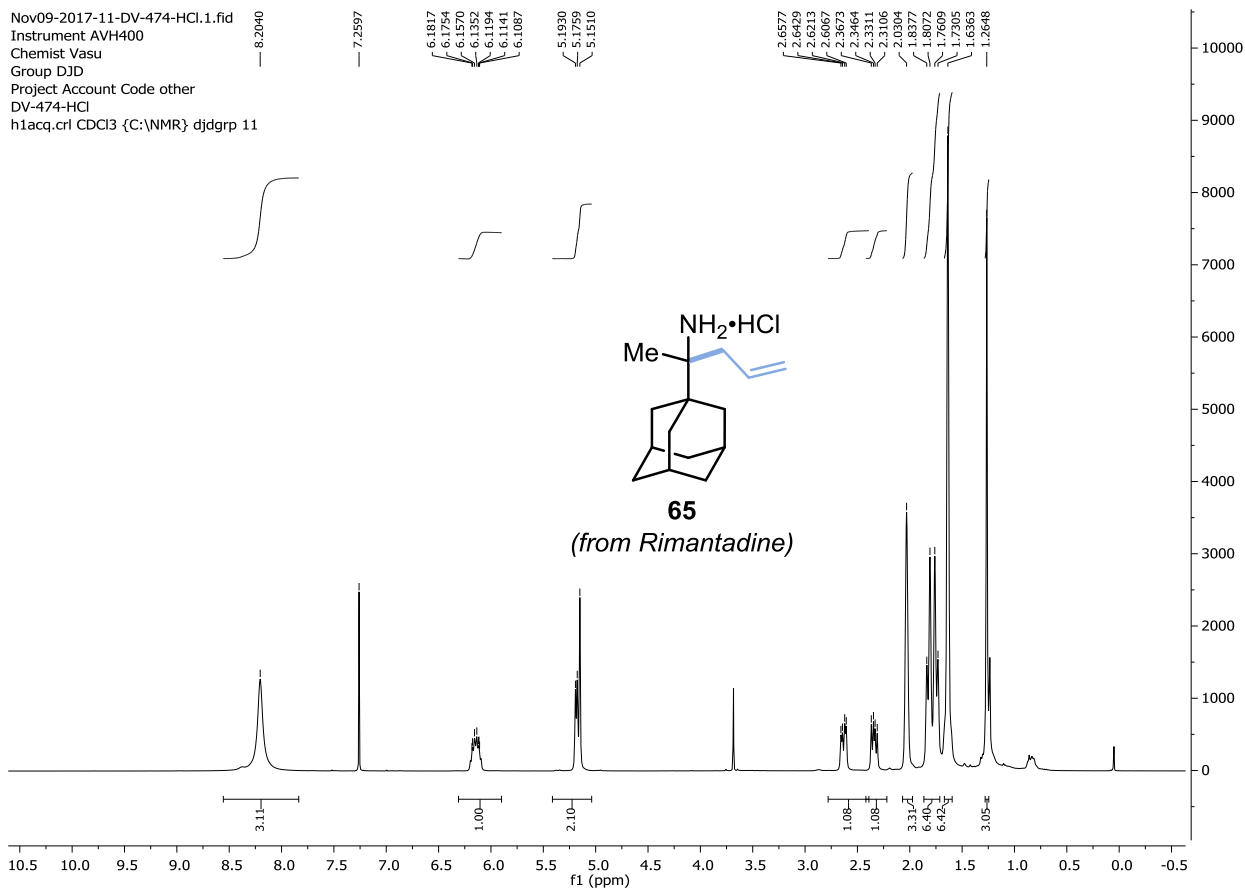

Nov09-2017-11-DV-474-HCl.2.fid  
Instrument AVH400  
Chemist Vasu  
Group DJD  
Project Account Code other  
DV-474-HCl  
c13acq\_512.crl CDCl3 {C:\NMR} djgrp 11

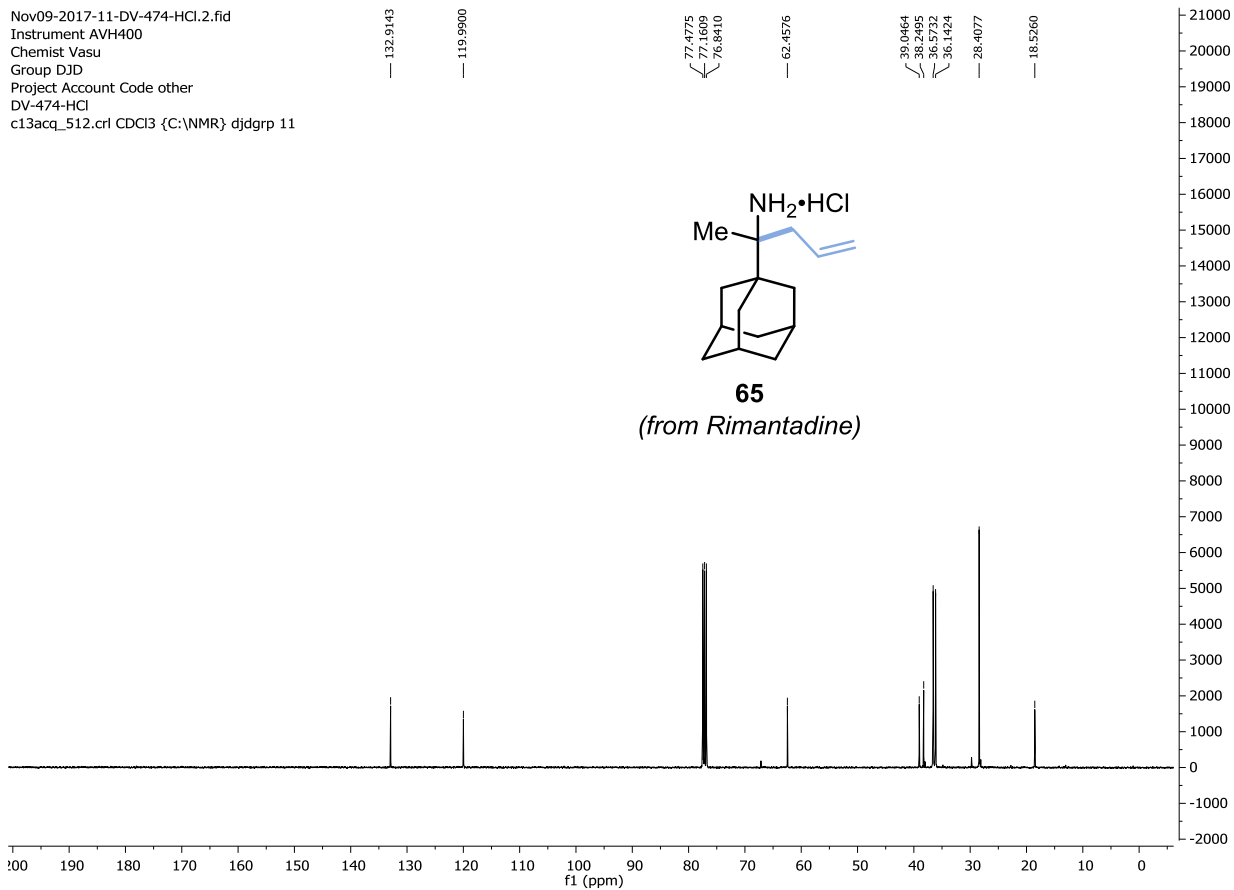

Apr04-2018-41-DV-627.1.fid  
 Instrument AVH400  
 Chemist Vasu  
 Group DJD  
 Project Account Code other  
 DV-627  
 h1acq.crl CD3CN {C:\NMR} djdgrp 41

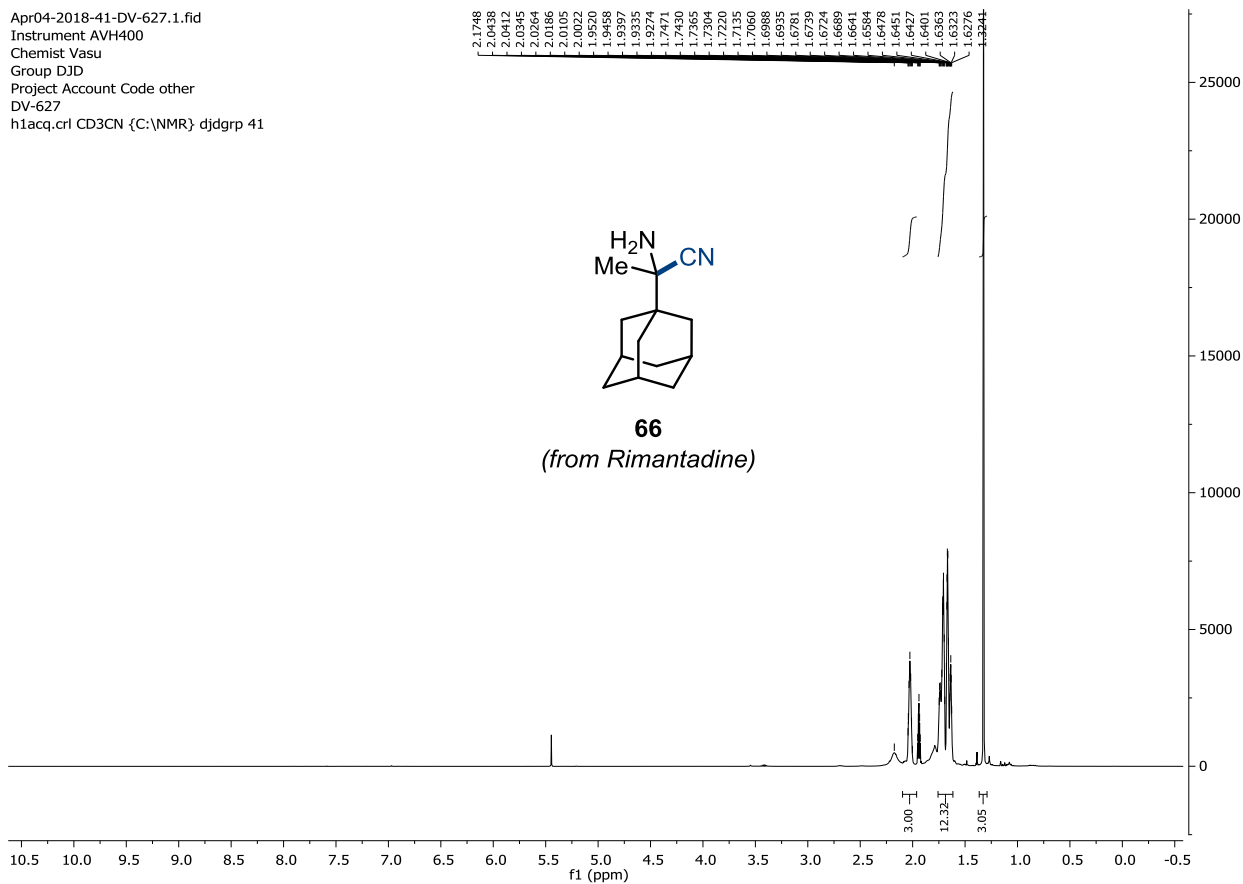

Apr04-2018-41-DV-627.2.fid  
 Instrument AVH400  
 Chemist Vasu  
 Group DJD  
 Project Account Code other  
 DV-627  
 c13acq\_512.crl CD3CN {C:\NMR} djdgrp 41

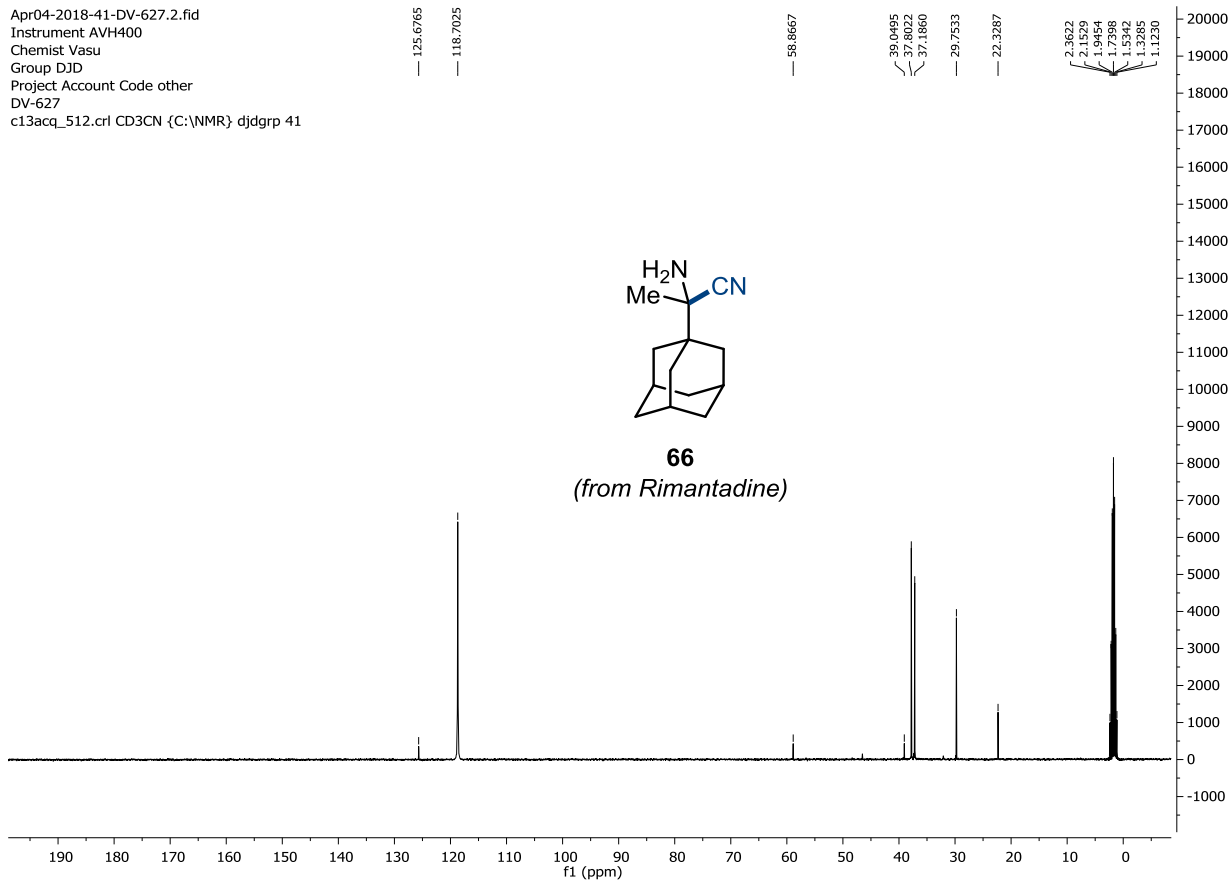

Dec01-2017-58-DV-473.1.fid  
 Instrument AVH400  
 Chemist Vasu  
 Group DJD  
 Project Account Code other  
 DV-473  
 h1acq.crl CDCl3 {C:\NMR} djgrp 58

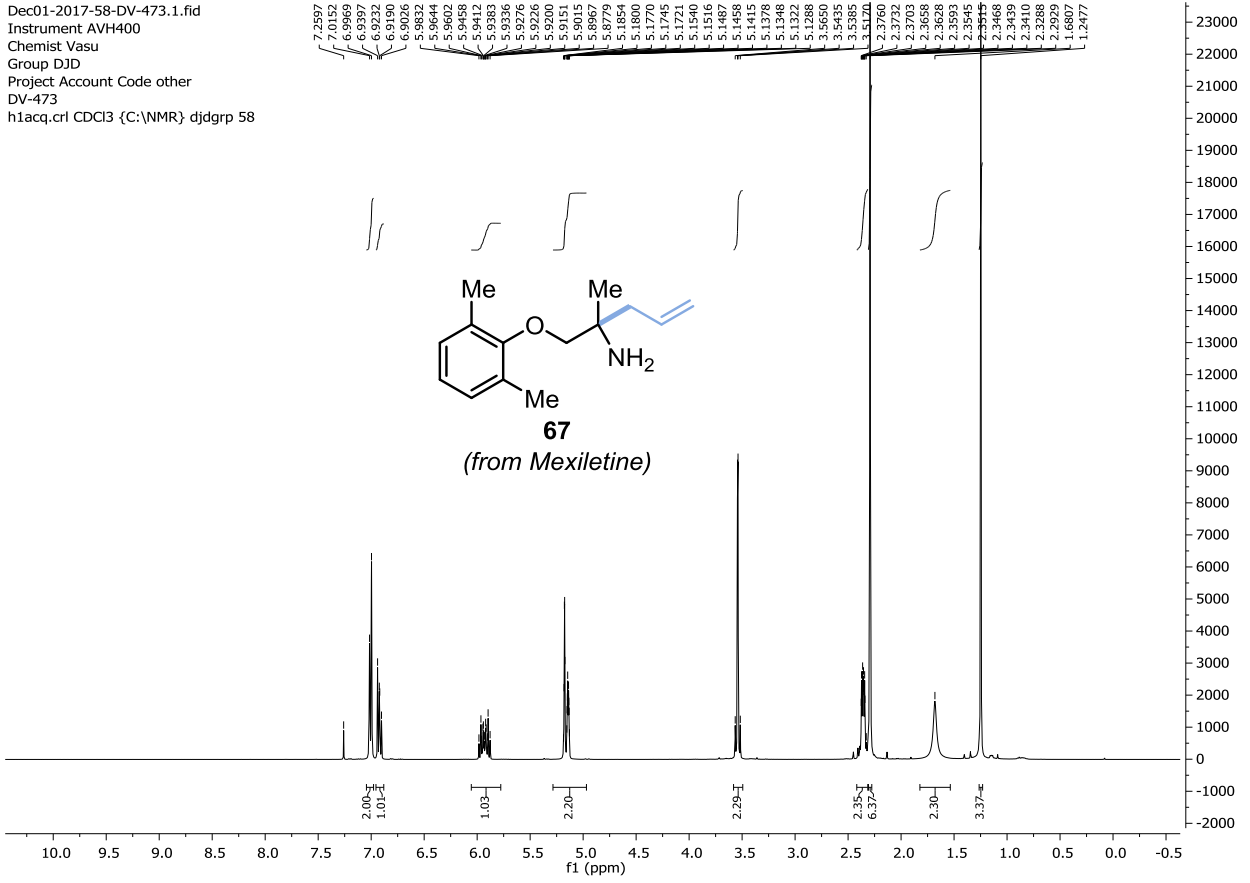

Dec01-2017-58-DV-473.3.fid  
 Instrument AVH400  
 Chemist Vasu  
 Group DJD  
 Project Account Code other  
 DV-473  
 c13acq\_512.crl CDCl3 {C:\NMR} djgrp 58

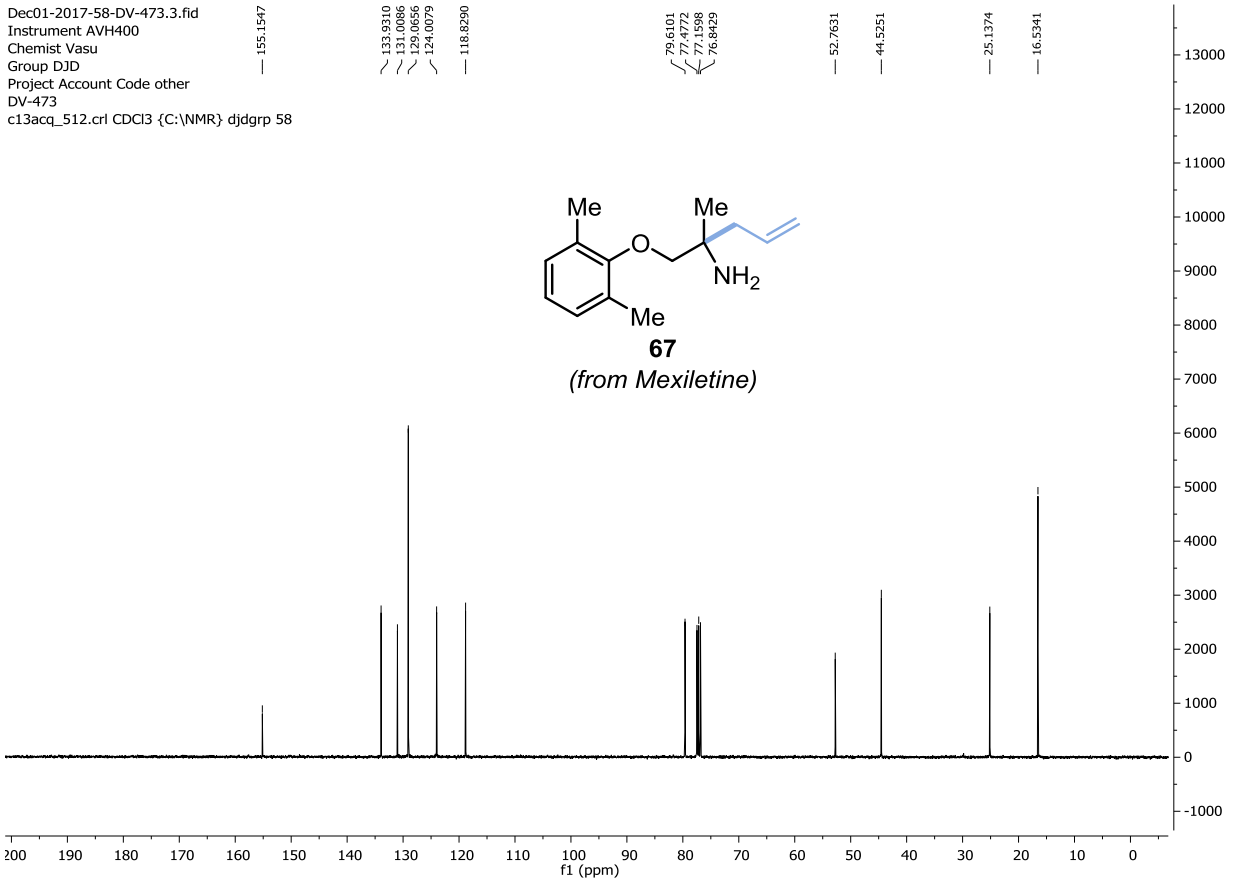

Apr06-2018-21-DV-631-c.1.fid  
Instrument AVH400  
Chemist Vasu  
Group DJD  
Project Account Code other  
DV-631-c  
h1acq.crl CD3CN {C:\NMR} djdgrp 21

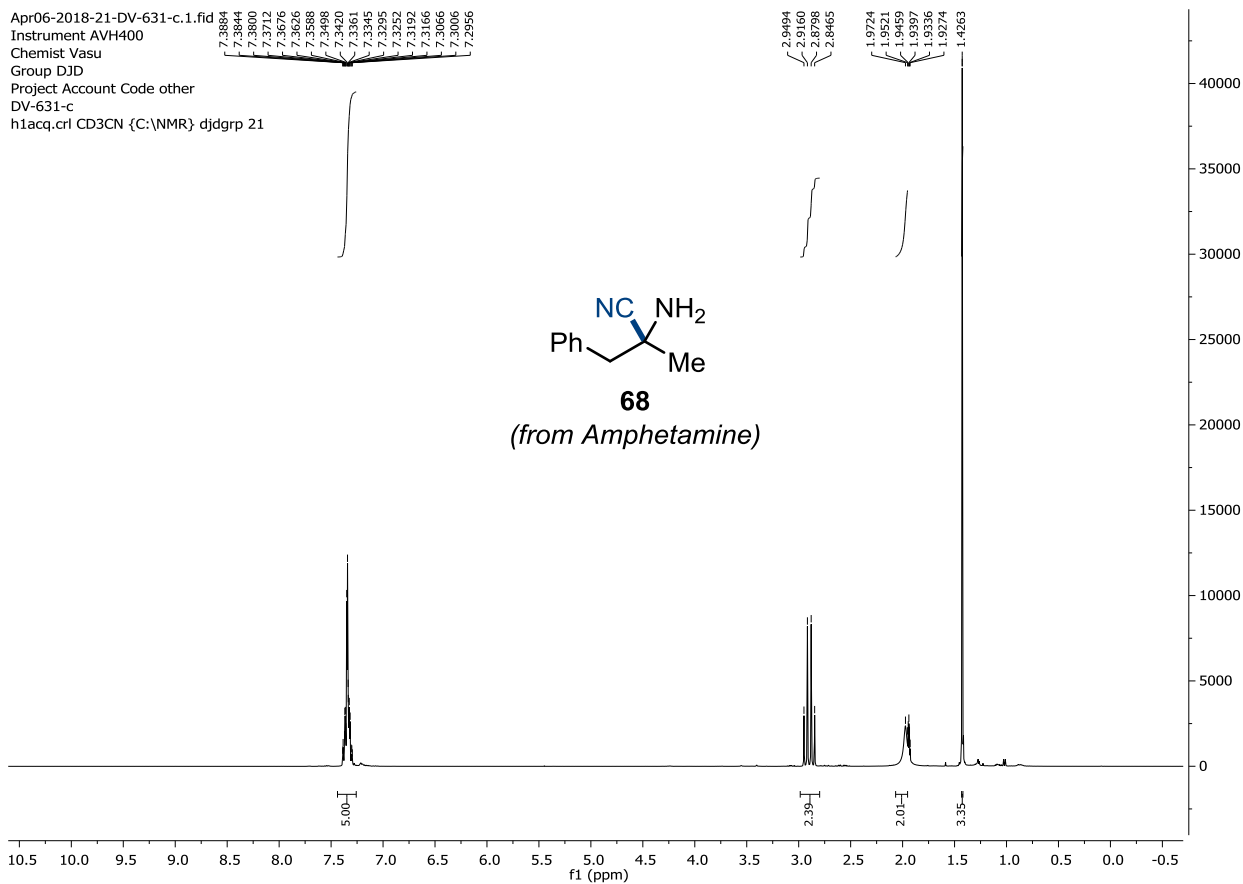

Apr06-2018-41-DV-631-c.2.fid  
Instrument AVH400  
Chemist Vasu  
Group DJD  
Project Account Code other  
DV-631-c  
c13acq\_512.crl CDCl3 {C:\NMR} djdgrp 41

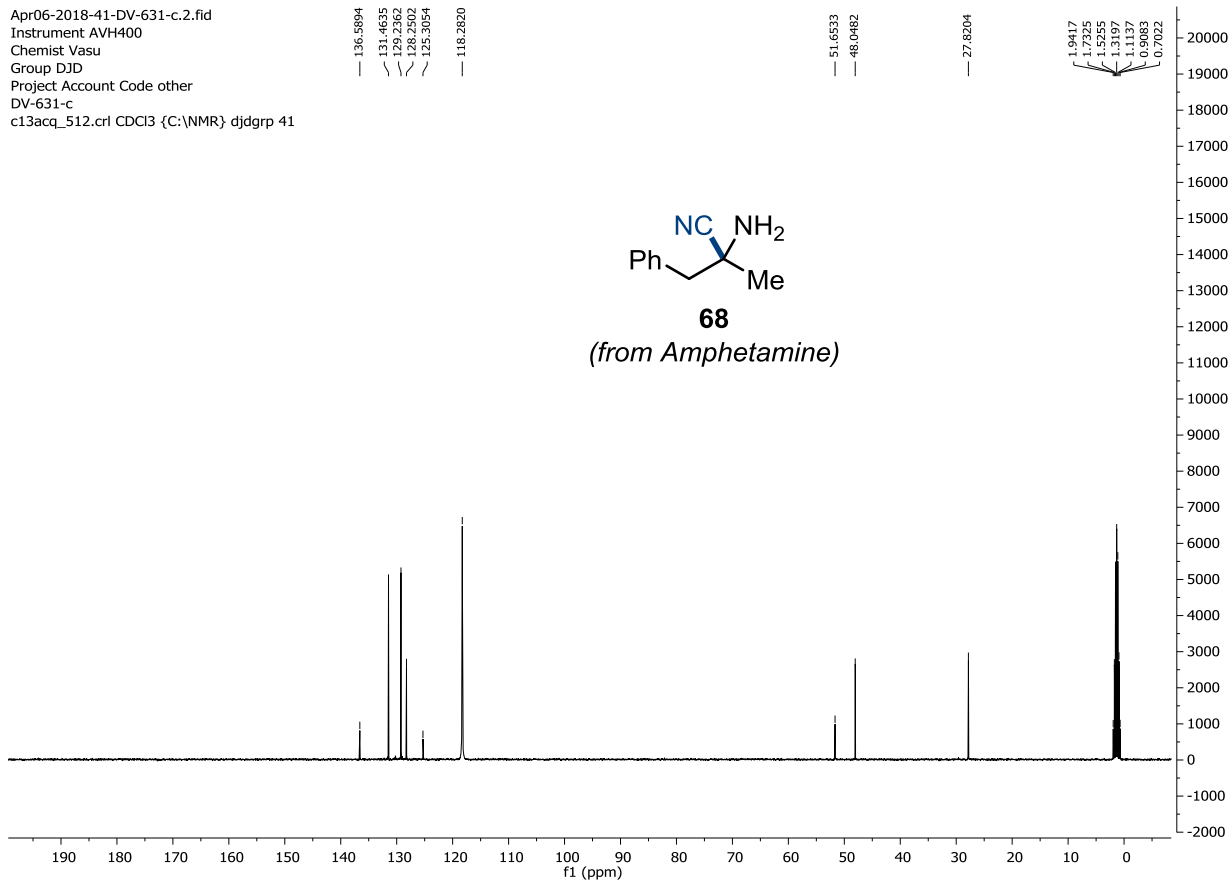

Jun07-2018-2-DV-584.1.fid  
Instrument AVH400  
Chemist Vasu  
Group DJD  
Project Account Code other  
DV-584  
h1acq.crl CDCl3 {C:\NMR} djgrp 2

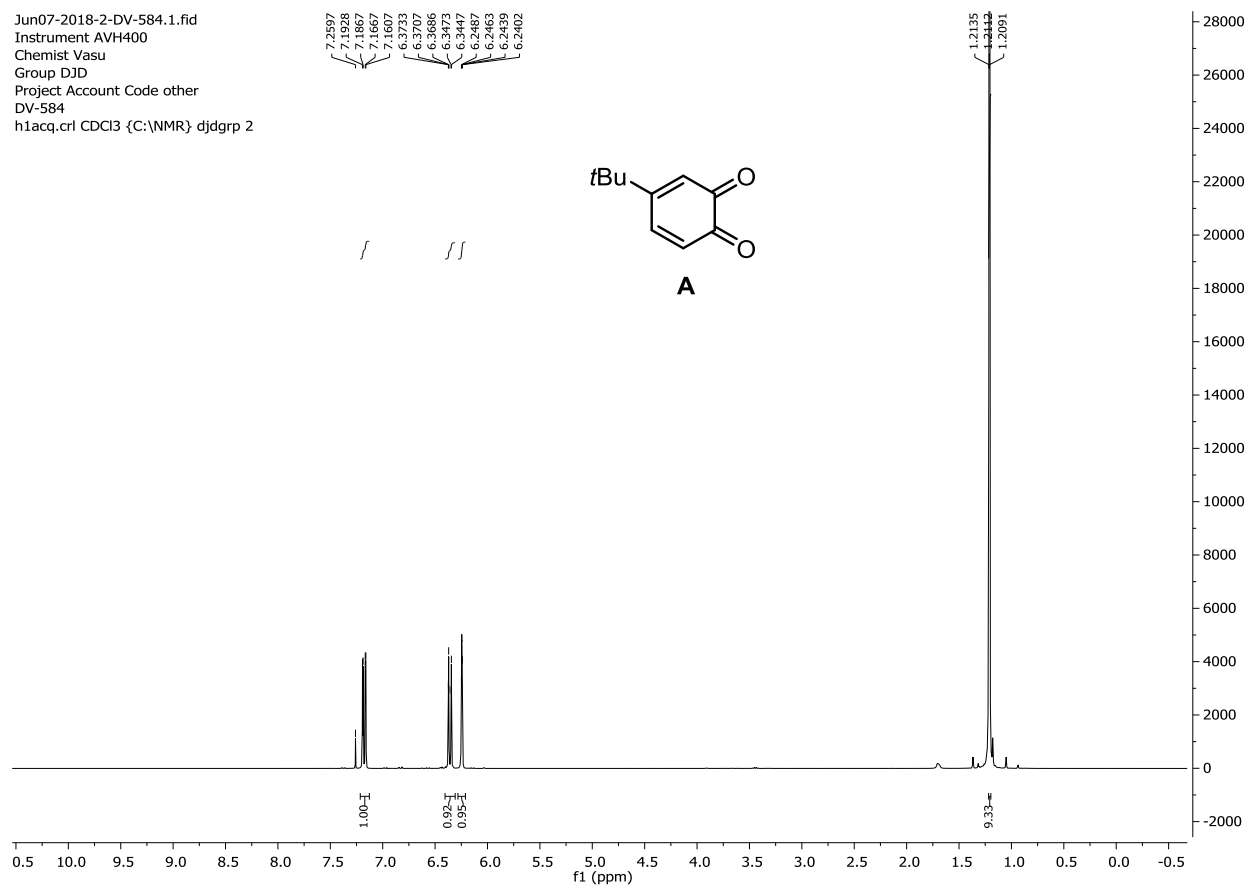

Jun07-2018-2-DV-584.2.fid  
Instrument AVH400  
Chemist Vasu  
Group DJD  
Project Account Code other  
DV-584  
c13acq\_256.crl CDCl3 {C:\NMR} djgrp 2

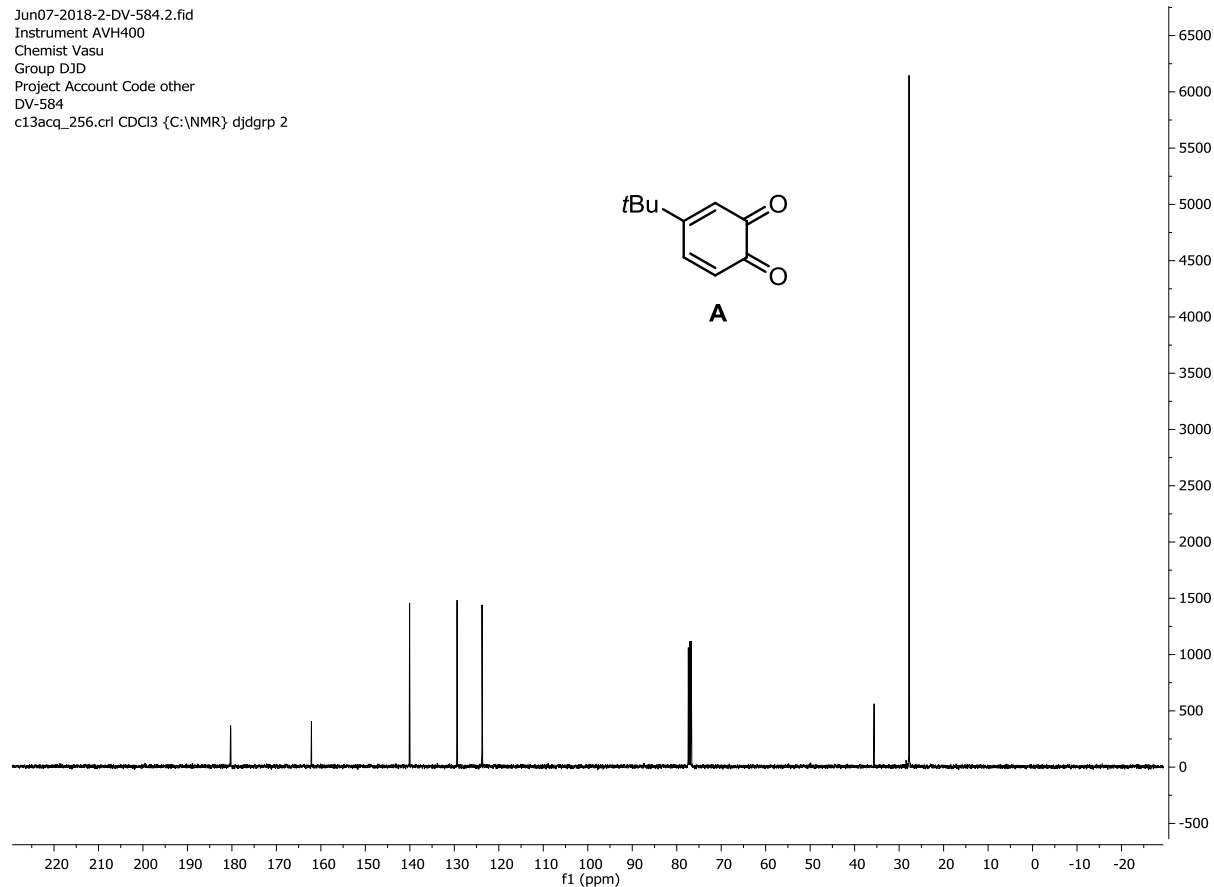

Feb05-2018-18-DV-582.1.fid  
 Instrument AVH400  
 Chemist Vasu  
 Group DJD  
 Project Account Code other  
 DV-582  
 h1acq.crl CDCl3 {C:\NMR} djdgrp 18

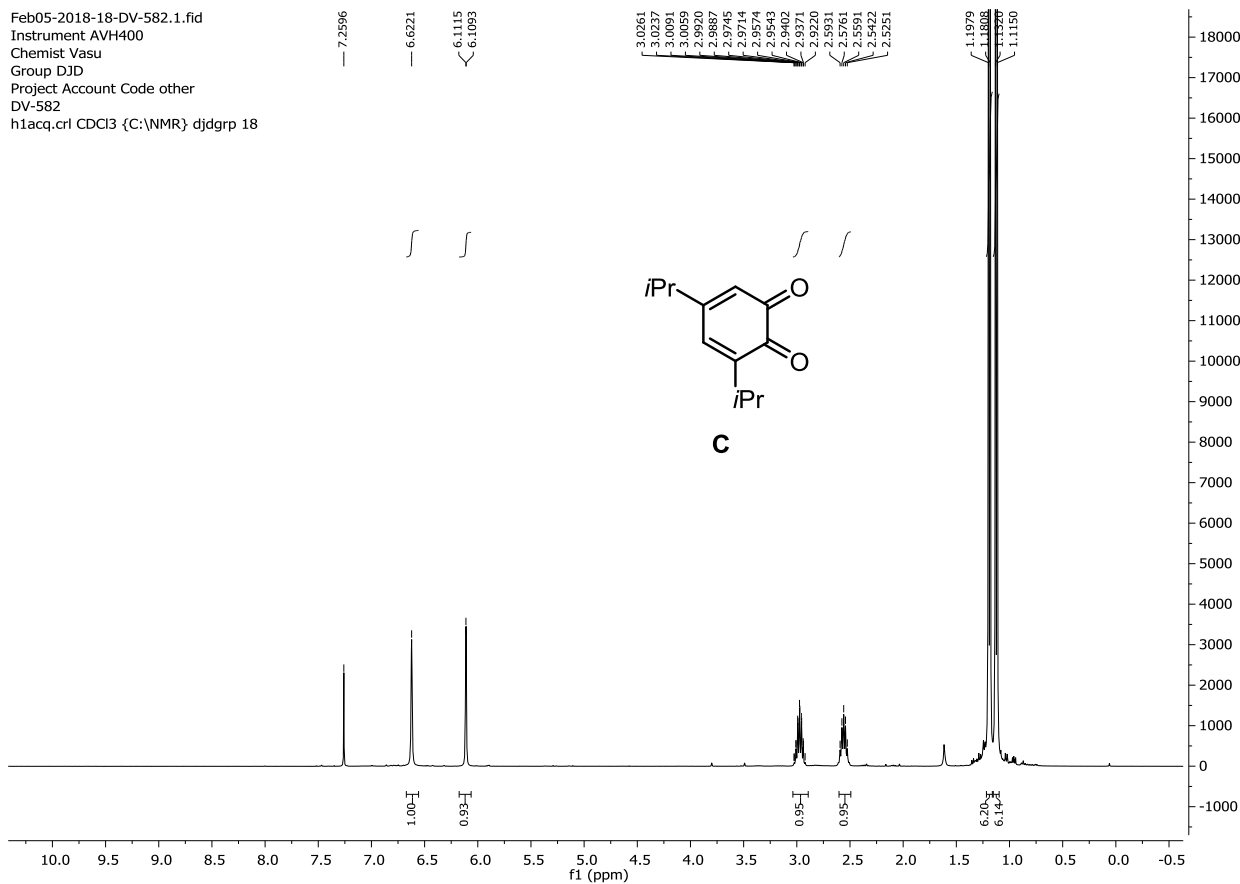

Feb05-2018-18-DV-582.3.fid  
 Instrument AVH400  
 Chemist Vasu  
 Group DJD  
 Project Account Code other  
 DV-582  
 c13acq\_512.crl CDCl3 {C:\NMR} djdgrp 18

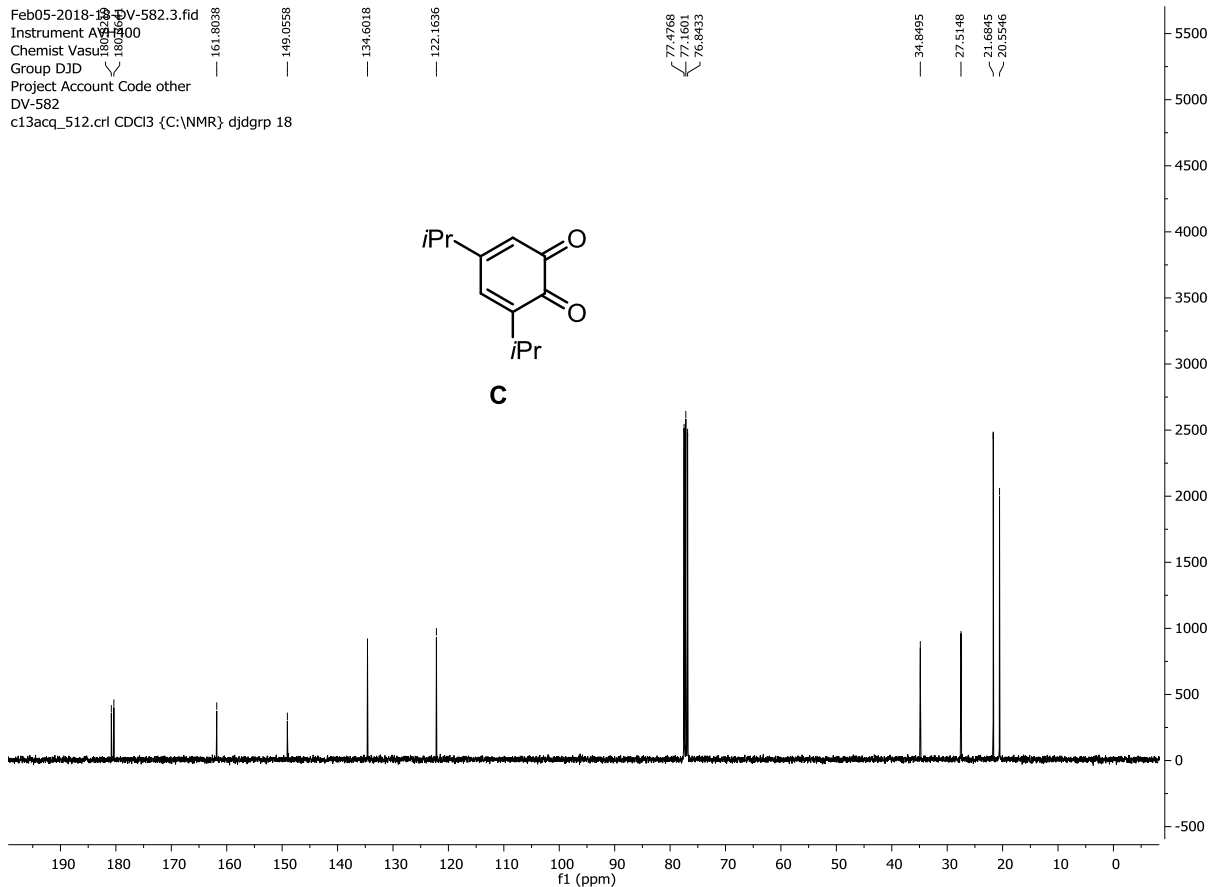

May24-2018-27-DV-661.3.fid  
Instrument AVH400  
Chemist Vasu  
Group DJD  
Project Account Code other  
DV-661  
h1acq.crl CDCl3 {C:\NMR} djgrp 27

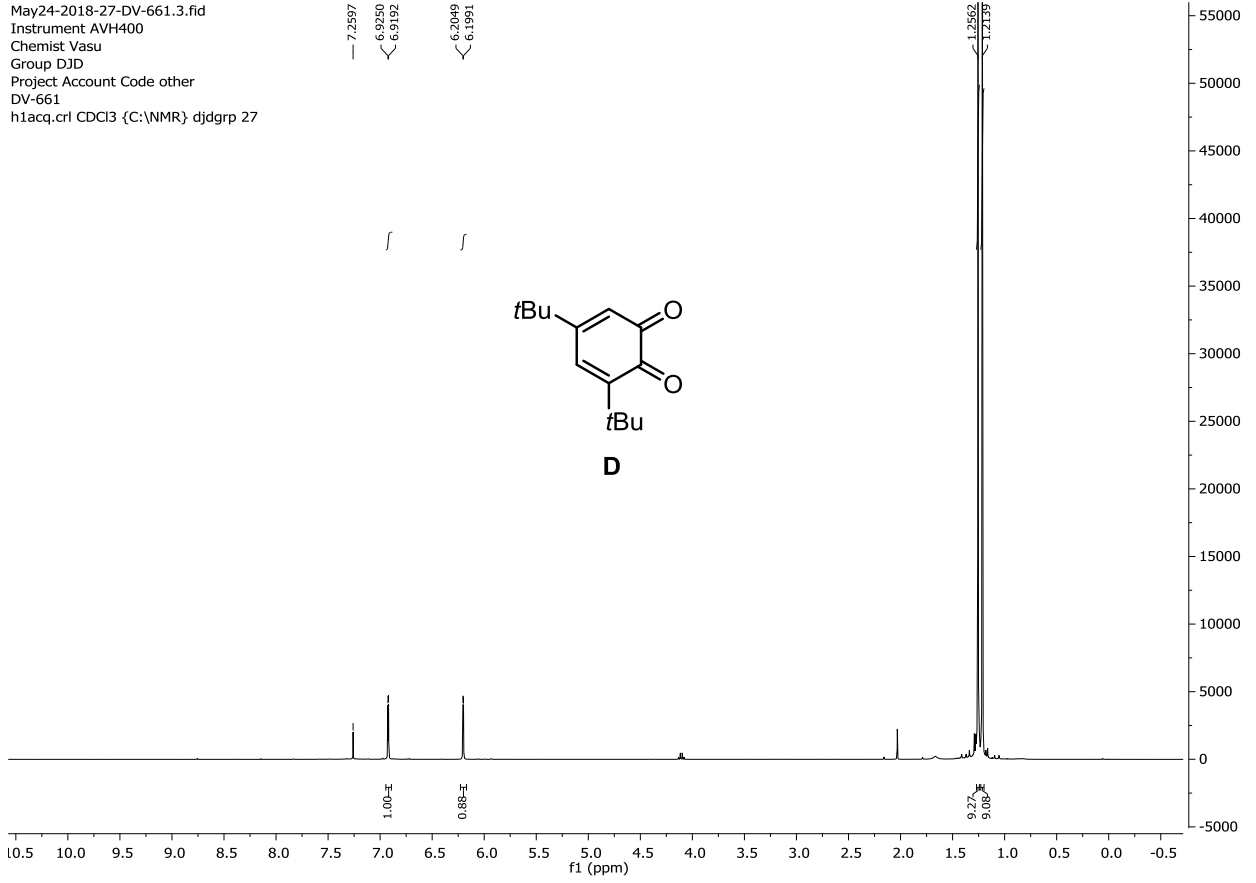

May24-2018-27-DV-661.4.fid  
Instrument AVH400  
Chemist Vasu  
Group DJD  
Project Account Code other  
DV-661  
c13acq\_512.crl CDCl3 {C:\NMR} djgrp 27

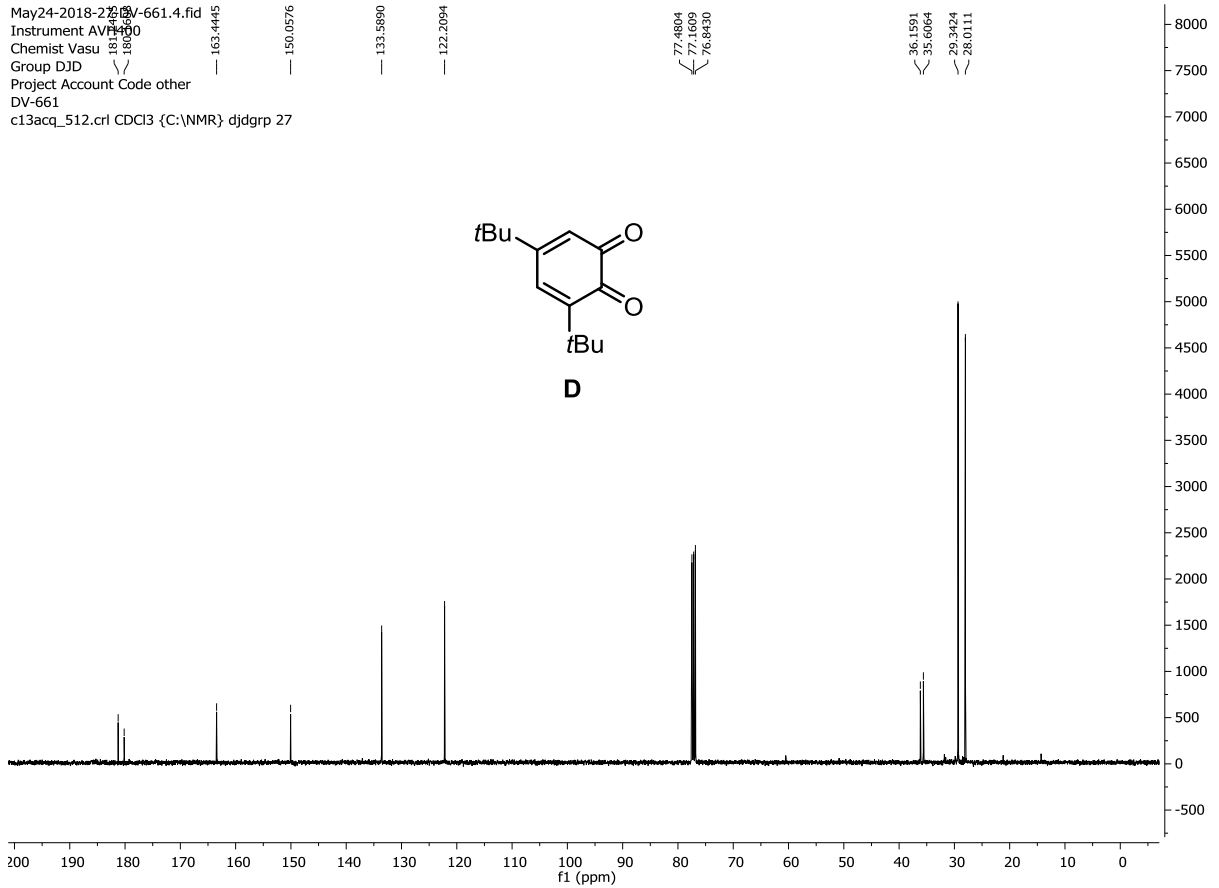

## 7: X- ray structure and data for compound 57:

Table S4: Crystal data and structure refinement for compound 57

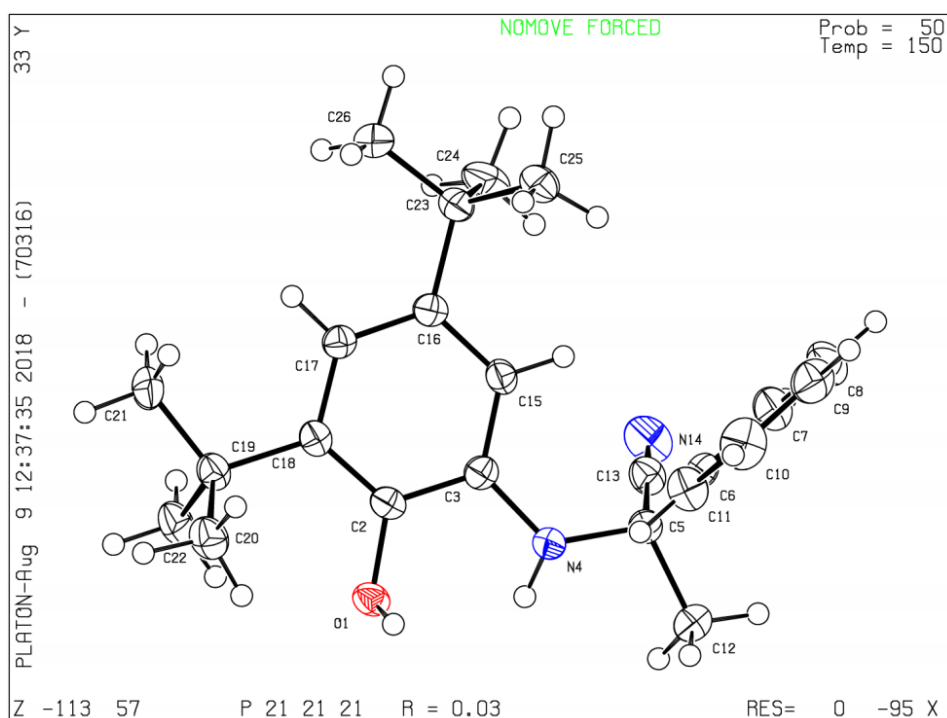

Table 1

### Experimental details

|                                                                              |                                                                 |
|------------------------------------------------------------------------------|-----------------------------------------------------------------|
| Crystal data                                                                 |                                                                 |
| Chemical formula                                                             | $C_{23}H_{30}N_2O$                                              |
| $M_r$                                                                        | 350.50                                                          |
| Crystal system, space group                                                  | Orthorhombic, $P2_12_12_1$                                      |
| Temperature (K)                                                              | 150                                                             |
| $a, b, c$ (Å)                                                                | 9.8225 (2), 10.4555 (2), 19.9670 (4)                            |
| $V$ (Å <sup>3</sup> )                                                        | 2050.59 (4)                                                     |
| $Z$                                                                          | 4                                                               |
| Radiation type                                                               | Cu $K\alpha$                                                    |
| $\mu$ (mm <sup>-1</sup> )                                                    | 0.53                                                            |
| Crystal size (mm)                                                            | 0.20 × 0.15 × 0.05                                              |
| Data collection                                                              |                                                                 |
| Diffractometer                                                               | Unknown                                                         |
| Absorption correction                                                        | Multi-scan<br><i>DENZO/SCALEPACK</i> (Otwinowski & Minor, 1997) |
| $T_{min}, T_{max}$                                                           | 0.86, 0.97                                                      |
| No. of measured, independent and observed [ $I > 2.0\sigma(I)$ ] reflections | 14910, 4230, 3970                                               |
| $R_{int}$                                                                    | 0.032                                                           |



|                                                                   |                                  |
|-------------------------------------------------------------------|----------------------------------|
| $(\sin \theta/\lambda)_{\max}$ ( $\text{\AA}^{-1}$ )              | 0.630                            |
| <b>Refinement</b>                                                 |                                  |
| $R[F^2 > 2\sigma(F^2)]$ , $wR(F^2)$ , $S$                         | 0.034, 0.087, 1.03               |
| No. of reflections                                                | 4230                             |
| No. of parameters                                                 | 326                              |
| No. of restraints                                                 | 116                              |
| H-atom treatment                                                  | Only H-atom coordinates refined  |
| $\Delta\rho_{\max}$ , $\Delta\rho_{\min}$ ( $\text{e \AA}^{-3}$ ) | 0.22, -0.16                      |
| Absolute structure                                                | Flack (1983), 1797 Friedel-pairs |
| Absolute structure parameter                                      | -0.1 (2)                         |

Computer programs: USER DEFINED DATA COLLECTION, USER DEFINED *CELL* REFINEMENT, USER DEFINED DATA REDUCTION, *SUPERFLIP* (Palatinus & Chapuis, 2007), *CRYSTALS* (Betteridge *et al.*, 2003), *CAMERON* (Watkin *et al.*, 1996).

**Table 2**

**Selected geometric parameters ( $\text{\AA}$ ,  $^\circ$ )**

|           |             |             |             |
|-----------|-------------|-------------|-------------|
| O1—C2     | 1.3866 (16) | C10—C11     | 1.392 (2)   |
| C2—C3     | 1.4077 (18) | C13—N14     | 1.136 (2)   |
| C2—C18    | 1.3930 (18) | C15—C16     | 1.3958 (18) |
| C3—N4     | 1.3990 (17) | C16—C17     | 1.3882 (18) |
| C3—C15    | 1.3893 (18) | C16—C23     | 1.5398 (18) |
| N4—C5     | 1.4447 (16) | C17—C18     | 1.4086 (18) |
| C5—C6     | 1.5304 (18) | C18—C19     | 1.5405 (17) |
| C5—C12    | 1.5385 (18) | C19—C20     | 1.539 (2)   |
| C5—C13    | 1.5003 (18) | C19—C21     | 1.533 (2)   |
| C6—C7     | 1.3841 (19) | C19—C22     | 1.538 (2)   |
| C6—C11    | 1.388 (2)   | C23—C24     | 1.534 (2)   |
| C7—C8     | 1.385 (2)   | C23—C25     | 1.537 (2)   |
| C8—C9     | 1.384 (3)   | C23—C26     | 1.534 (2)   |
| C9—C10    | 1.376 (3)   |             |             |
| O1—C2—C3  | 117.05 (11) | C5—C13—N14  | 178.10 (15) |
| O1—C2—C18 | 121.91 (11) | C3—C15—C16  | 120.67 (12) |
| C3—C2—C18 | 120.99 (11) | C15—C16—C17 | 118.46 (12) |
| C2—C3—N4  | 116.27 (11) | C15—C16—C23 | 118.42 (11) |
| C2—C3—C15 | 119.78 (12) | C17—C16—C23 | 123.11 (11) |
| N4—C3—C15 | 123.93 (12) | C16—C17—C18 | 122.71 (12) |
| C3—N4—C5  | 124.04 (11) | C17—C18—C2  | 117.39 (11) |
| N4—C5—C6  | 112.94 (11) | C17—C18—C19 | 121.63 (12) |
| N4—C5—C12 | 107.65 (11) | C2—C18—C19  | 120.98 (11) |
| C6—C5—C12 | 108.96 (11) | C18—C19—C20 | 110.78 (11) |
| N4—C5—C13 | 110.23 (11) | C18—C19—C21 | 111.43 (11) |

|            |             |             |             |
|------------|-------------|-------------|-------------|
| C6—C5—C13  | 109.61 (11) | C20—C19—C21 | 107.07 (12) |
| C12—C5—C13 | 107.27 (11) | C18—C19—C22 | 109.77 (11) |
| C5—C6—C7   | 121.42 (12) | C20—C19—C22 | 109.56 (12) |
| C5—C6—C11  | 119.01 (12) | C21—C19—C22 | 108.14 (12) |
| C7—C6—C11  | 119.35 (13) | C16—C23—C24 | 109.40 (11) |
| C6—C7—C8   | 120.44 (14) | C16—C23—C25 | 109.66 (11) |
| C7—C8—C9   | 120.28 (15) | C24—C23—C25 | 108.87 (12) |
| C8—C9—C10  | 119.47 (15) | C16—C23—C26 | 112.19 (11) |
| C9—C10—C11 | 120.61 (15) | C24—C23—C26 | 108.63 (13) |
| C10—C11—C6 | 119.85 (14) | C25—C23—C26 | 108.02 (12) |

**Table 3**

**Hydrogen-bond geometry (Å, °)**

| <i>D</i> —H... <i>A</i> | <i>D</i> —H | H... <i>A</i> | <i>D</i> ... <i>A</i> | <i>D</i> —H... <i>A</i> |
|-------------------------|-------------|---------------|-----------------------|-------------------------|
| C20—H201...O1           | 0.95        | 2.42          | 3.016 (2)             | 120 (1)                 |
| C22—H221...O1           | 0.97        | 2.43          | 3.051 (2)             | 122 (1)                 |
| O1—H11...N14            | 0.84        | 1.99          | 2.822 (2)             | 175 (2)                 |

## checkCIF/PLATON report

**Alert level G**

PLAT002\_ALERT\_2\_G Number of Distance or Angle Restraints on AtSite 53 Note  
 PLAT152\_ALERT\_1\_G The Supplied and Calc. Volume s.u. Differ by ... 3 Units  
 PLAT230\_ALERT\_2\_G Hirshfeld Test Diff for C5 --C13 . 6.3 s.u.  
 PLAT791\_ALERT\_4\_G Model has Chirality at C5 (Chiral SPGR) R Verify  
 PLAT860\_ALERT\_3\_G Number of Least-Squares Restraints ..... 116 Note  
 PLAT882\_ALERT\_1\_G No Datum for \_diffn\_reflms\_av\_unetI/netI ..... Please Do !

## 8: References:

1. Y. Qin, L. Zhang, J. Lv, S. Luo, J. P Cheng, *Org. Lett.* **2015**, *17*, 1469.
2. M. Uyanik, N. Sasakura, M. Kuwahata, Y. Ejima, K. Ishihara, *Chem Lett.* **2015** *44*, 381.
3. M. Kischkewitz, K. Okamoto, C. Mück-Lichtenfeld, A. Studer, *Science* **2017**, *355*, 936.
4. T. Hashimoto, Y. Kawamata, K. Maruoka, *Nat. Chem.* **2014**, *6*, 702.
5. V. Cherkasov, N. Druzhkov, T. Kocherova, G. Fukin, A. Shavyrin, *Tetrahedron* **2011**, *67*, 80.
6. B. Thiedemann, P. J. Gliese, J. Hoffmann, P. G. Lawrence, F. D. Sönnichsen, A. Staubitz, *Chem. Commun.* **2017**, *53*, 7258.
7. S. Stotani, C. Lorenz, M. Winkler, F. Medda, E. Picazo, R. O. Martinez, A. Karawajczyk, J. Sanchez-Quesada, F. Giordanetto, *ACS Comb. Sci.* **2016**, *18*, 330.
8. J. Zhang, Y. Li, F. Zhang, C. Hu, Y. Chen, *Angew. Chem. Int. Ed.* **2016**, *55*, 1872.
9. B. Giese, T. Linker, *Synthesis*, **1992**, 46-48
10. G. J. Choi, Q. Zhu, D.-C. Miller, C. J. Gu, R. R. Knowles, *Nature* **2016**, *539*, 268.
11. P. Gildner, A. A. S. Gietter, D. Cui, D. A. Watson, *J. Am. Chem. Soc.*, **2012**, *134* 9942.
